# Supplementary material for: Comparative Gene Analysis in Chordate Embryonic Development Reveals Co-existence of Von Baer’s and Haeckel’s Postulates
Source: Research Square preprint supplement (doi:10.21203/rs.3.rs-579345/v1), 2021-06-17
Supplement: Supplementary file 6 [file 80c8b79e38ba565a223cd4fa.xlsx]

## Sheet: Mus musculus
Supplementary Data 1: Sample information used in our study
All data in this analysis were downloaded from Hu et al. [8]. In detail, we got the data from DDBJ (accession number DRA003460) and GEO database (accession number SRP014559) [28]. Here we remove the adult samples from previous studies, the samples were used in this study are listed.
Species	Samples	Figure label	Reads Number
Mus musculus	Mm_2cell_1.fastq.gz	2Cell	36109863
	Mm_2cell_2.fastq.gz		39258687
	Mm_6-8cell_1.fastq.gz	6cell	39050096
	Mm_6-8cell_2.fastq.gz		38387016
	Mm_morulal_1.fastq.gz	morula	38378166
	Mm_morulal_2.fastq.gz		37598104
	Mm_blastocyst_1.fastq.gz	blastocyst	37716375
	Mm_blastocyst_2.fastq.gz		34335620
	Mm_E7.5_1.fastq.gz	E7.5	52335503
	Mm_E7.5_2.fastq.gz		43204399
	Mm_E8.5_1.fastq.gz	E8.5	41022002
	Mm_E8.5_2.fastq.gz		46169762
	Mm_E8.5_3.fastq.gz		42879518
	Mm_E9.0_1.fastq.gz	E9.0	43685479
	Mm_E9.0_2.fastq.gz		38908036
	Mm_E9.5_1.fastq.gz	E9.5	41392141
	Mm_E9.5_2.fastq.gz		49370450
	Mm_E10.5_1.fastq.gz	E10.5	44595290
	Mm_E10.5_2.fastq.gz		41565289
	Mm_E10.5_3.fastq.gz		44679767
	Mm_E11.5_1.fastq.gz	E11.5	45464577
	Mm_E11.5_2.fastq.gz		40486103
	Mm_E11.5_3.fastq.gz		44008585
	Mm_E12.5_1.fastq.gz	E12.5	42161925
	Mm_E12.5_2.fastq.gz		33928869
	Mm_E12.5_3.fastq.gz		42214168
	Mm_E13.5_1.fastq.gz	E13.5	44600479
	Mm_E13.5_2.fastq.gz		49251673
	Mm_E14.5_1.fastq.gz	E14.5	41348566
	Mm_E14.5_2.fastq.gz		35808250
	Mm_E15.5_1.fastq.gz	E15.5	37554568
	Mm_E15.5_2.fastq.gz		39279273
	Mm_E16.5_1.fastq.gz	E16.5	38367392
	Mm_E16.5_2.fastq.gz		38847417
	Mm_E16.5_3.fastq.gz		38386227
	Mm_E17.5_1.fastq.gz	E17.5	38318464
	Mm_E17.5_2.fastq.gz		38463909
	Mm_E18.5_1.fastq.gz	E18.5	37763524
	Mm_E18.5_2.fastq.gz		43372467

## Sheet: Pelodiscus sinensis
Species	Samples	Figure label	Reads Number
Pelodiscus sinensis	Ps_Gastrula_1.fastq.gz	Gastrula	46765342
	Ps_Gastrula_2.fastq.gz		45385795
	Ps_Neurula_1.fastq.gz	Neurula	35253861
	Ps_Neurula_2.fastq.gz		35040231
	Ps_TK5_1.fastq.gz	TK5	38387346
	Ps_TK5_2.fastq.gz		36141315
	Ps_TK7_1.fastq.gz	TK7	38146156
	Ps_TK7_2.fastq.gz		36297084
	Ps_TK9_1.fastq.gz	TK9	38075420
	Ps_TK9_2.fastq.gz		40501663
	Ps_TK11_1.fastq.gz	TK11	40996050
	Ps_TK11_2.fastq.gz		36140745
	Ps_TK13_1.fastq.gz	TK13	34445162
	Ps_TK13_2.fastq.gz		30604839
	Ps_TK14_1.fastq.gz	TK14	32539227
	Ps_TK14_2.fastq.gz		44234749
	Ps_TK15_1.fastq.gz	TK15	31439635
	Ps_TK15_2.fastq.gz		34275302
	Ps_TK17_1.fastq.gz	TK17	31198602
	Ps_TK17_2.fastq.gz		26946687
	Ps_TK21_1.fastq.gz	TK21	31966605
	Ps_TK21_2.fastq.gz		42832633
	Ps_TK23_1.fastq.gz	TK23	27135492
	Ps_TK23_2.fastq.gz		37117631
	Ps_TK25_1.fastq.gz	TK25	40959364
	Ps_TK25_2.fastq.gz		40916173
	Ps_TK27_1.fastq.gz	TK27	44117301
	Ps_TK27_2.fastq.gz		41419511

## Sheet: Gallus gallus
Species	Samples	Figure label	Reads Number
Gallus gallus	Gg_Prim_1.fastq.gz	Prim	20212361
	Gg_Prim_2.fastq.gz		20930573
	Gg_HH6_1.fastq.gz	HH6	31895802
	Gg_HH6_2.fastq.gz		20446787
	Gg_HH8_1.fastq.gz	HH8	43845498
	Gg_HH8_2.fastq.gz		41362994
	Gg_HH11_1.fastq.gz	HH11	32138221
	Gg_HH11_2.fastq.gz		19697787
	Gg_HH14_1.fastq.gz	HH14	32735998
	Gg_HH14_2.fastq.gz		31026654
	Gg_HH16_1.fastq.gz	HH16	32568360
	Gg_HH16_2.fastq.gz		31468292
	Gg_HH19_1.fastq.gz	HH19	40464112
	Gg_HH19_2.fastq.gz		31295460
	Gg_HH21_1.fastq.gz	HH21	42510430
	Gg_HH21_2.fastq.gz		38924996
	Gg_HH24_1.fastq.gz	HH24	40731240
	Gg_HH24_2.fastq.gz		43184112
	Gg_HH28_1.fastq.gz	HH28	22013944
	Gg_HH28_2.fastq.gz		21506469
	Gg_HH32_1.fastq.gz	HH32	42185115
	Gg_HH32_2.fastq.gz		44328446
	Gg_HH34_1.fastq.gz	HH34	40751202
	Gg_HH34_2.fastq.gz		36731581
	Gg_HH38_1.fastq.gz	HH38	31726995
	Gg_HH38_2.fastq.gz		31012093

## Sheet: Xenopus laevis
Species	Samples	Figure label	Reads Number
Xenopus laevis	Xl_stage2_1.fastq.gz	stage2	44571493
	Xl_stage2_2.fastq.gz		42668513
	Xl_stage5_1.fastq.gz	stage5	33514189
	Xl_stage5_2.fastq.gz		41638074
	Xl_stage9_1.fastq.gz	stage9	40378251
	Xl_stage9_2.fastq.gz		38941106
	Xl_stage11_1.fastq.gz	stage11	42909537
	Xl_stage11_2.fastq.gz		41253047
	Xl_stage13_1.fastq.gz	stage13	42706099
	Xl_stage13_2.fastq.gz		41681928
	Xl_stage17_1.fastq.gz	stage17	52150036
	Xl_stage17_2.fastq.gz		46293933
	Xl_stage19_1.fastq.gz	stage19	49764095
	Xl_stage19_2.fastq.gz		47995067
	Xl_stage21_1.fastq.gz	stage21	35709685
	Xl_stage21_2.fastq.gz		37517884
	Xl_stage23_1.fastq.gz	stage23	35692030
	Xl_stage23_2.fastq.gz		32622933
	Xl_stage26_1.fastq.gz	stage26	48429765
	Xl_stage26_2.fastq.gz		54312596
	Xl_stage28_1.fastq.gz	stage28	47605170
	Xl_stage28_2.fastq.gz		59885114
	Xl_stage31_1.fastq.gz	stage31	56681894
	Xl_stage31_2.fastq.gz		45728765
	Xl_stage37-38_1.fastq.gz	stage37	45815166
	Xl_stage37-38_2.fastq.gz		49111768
	Xl_stage43_1.fastq.gz	stage43	33493233
	Xl_stage43_2.fastq.gz		47773720
	Xl_stage48_1.fastq.gz	stage48	50145689
	Xl_stage48_2.fastq.gz		37189817
	Xl_stage61_1.fastq.gz	stage61	48837838
	Xl_stage61_2.fastq.gz		40556593
	Xl_stage66_1.fastq.gz	stage66	41377210
	Xl_stage66_2.fastq.gz		34300483

## Sheet: Xenopus tropicalis
Species	Samples	Figure label	Reads Number
Xenopus tropicalis	Xt_stage2_1.fastq.gz	stage2	47509403
	Xt_stage2_2.fastq.gz		43727437
	Xt_stage5_1.fastq.gz	stage5	44716035
	Xt_stage5_2.fastq.gz		44058047
	Xt_stage9_1.fastq.gz	stage9	45335417
	Xt_stage9_2.fastq.gz		42739786
	Xt_stage11_1.fastq.gz	stage11	42602327
	Xt_stage11_2.fastq.gz		41579867
	Xt_stage13_1.fastq.gz	stage13	42316784
	Xt_stage13_2.fastq.gz		39083988
	Xt_stage17_1.fastq.gz	stage17	38736293
	Xt_stage17_2.fastq.gz		43390177
	Xt_stage19_1.fastq.gz	stage19	54309557
	Xt_stage19_2.fastq.gz		43064276
	Xt_stage21_1.fastq.gz	stage21	39118528
	Xt_stage21_2.fastq.gz		37267150
	Xt_stage23_1.fastq.gz	stage23	44826460
	Xt_stage23_2.fastq.gz		46380666
	Xt_stage26_1.fastq.gz	stage26	43805750
	Xt_stage26_2.fastq.gz		48544251
	Xt_stage28_1.fastq.gz	stage28	50294478
	Xt_stage28_2.fastq.gz		41285467
	Xt_stage31_1.fastq.gz	stage31	39826272
	Xt_stage31_2.fastq.gz		40842150
	Xt_stage37-38_1.fastq.gz	stage37	38783461
	Xt_stage37-38_2.fastq.gz		41820471
	Xt_stage43_1.fastq.gz	stage43	42796428
	Xt_stage43_2.fastq.gz		46608500
	Xt_stage48_1.fastq.gz	stage48	38334106
	Xt_stage48_2.fastq.gz		42557988
	Xt_stage61_1.fastq.gz	stage61	51920362
	Xt_stage61_2.fastq.gz		54668983
	Xt_stage66_1.fastq.gz	stage66	48178189
	Xt_stage66_2.fastq.gz		48718302

## Sheet: Danio rerio
Species	Samples	Figure label	Reads Number
Danio rerio	Dr_2cell_1.fastq.gz	2cell	41566511
	Dr_2cell_2.fastq.gz		36875170
	Dr_8cell_1.fastq.gz	8cell	36669912
	Dr_8cell_2.fastq.gz		37089219
	Dr_32cell_1.fastq.gz	32cell	38709065
	Dr_32cell_2.fastq.gz		36787130
	Dr_30epiboly_1.fastq.gz	30epiboly	43102197
	Dr_30epiboly_2.fastq.gz		31290285
	Dr_shield_1.fastq.gz	shield	38346220
	Dr_shield_2.fastq.gz		36443979
	Dr_75epiboly_1.fastq.gz	75epiboly	37850537
	Dr_75epiboly_2.fastq.gz		32520215
	Dr_90epiboly_1.fastq.gz	90epiboly	34239805
	Dr_90epiboly_2.fastq.gz		35723586
	Dr_bud_1.fastq.gz	bud	45402910
	Dr_bud_2.fastq.gz		41047782
	Dr_6somite_1.fastq.gz	6somite	35293119
	Dr_6somite_2.fastq.gz		37044310
	Dr_14somite_1.fastq.gz	14somite	37443860
	Dr_14somite_2.fastq.gz		37151742
	Dr_14somite_3.fastq.gz		37346105
	Dr_prime5-6_1.fastq.gz	prime5.6	38631295
	Dr_prime5-6_2.fastq.gz		36785497
	Dr_prime5-6_3.fastq.gz		39033328
	Dr_prime25_1.fastq.gz	prime25	35448627
	Dr_prime25_2.fastq.gz		37501361
	Dr_48h_1.fastq.gz	48h	39802404
	Dr_48h_2.fastq.gz		37028047
	Dr_60h_1.fastq.gz	60h	35384682
	Dr_60h_2.fastq.gz		38753370
	Dr_72h_1.fastq.gz	72h	38971945
	Dr_72h_2.fastq.gz		34297958

## Sheet: Branchiostoma floridae
Species	Samples	Figure label	Reads Number
Branchiostoma floridae	Bf_UFegg_1.fastq.gz	Ufegg	51165770
	Bf_UFegg_2.fastq.gz		60579248
	Bf_32-64_1.fastq.gz	32-64	56415654
	Bf_32-64_2.fastq.gz		57000061
	Bf_blastula_1.fastq.gz	blastula	56083328
	Bf_blastula_2.fastq.gz		57063175
	Bf_G1_1.fastq.gz	G1	54496005
	Bf_G1_2.fastq.gz		53428468
	Bf_G5-6_1.fastq.gz	G5-6	54244448
	Bf_G5-6_2.fastq.gz		59066184
	Bf_N1_1.fastq.gz	N1	53929279
	Bf_N1_2.fastq.gz		55359756
	Bf_N3_1.fastq.gz	N3	69869564
	Bf_N3_2.fastq.gz		76790918
	Bf_N3_3.fastq.gz		78472254
	Bf_L1_1.fastq.gz	L1	64475767
	Bf_L1_2.fastq.gz		54213811
	Bf_L2_1.fastq.gz	L2	50249407
	Bf_L2_2.fastq.gz		49564508
	Bf_L3_1.fastq.gz	L3	55916248
	Bf_L3_2.fastq.gz		54769900
	Bf_Juvenile_1.fastq.gz	Juvenile	58104178
	Bf_Juvenile_2.fastq.gz		53940639

## Sheet: Ciona intestinalis
Species	Samples	Figure label	Reads Number
Ciona intestinalis	Ci_St1_1.fastq.gz	St1	21477578
	Ci_St1_2.fastq.gz		28890419
	Ci_St2_1.fastq.gz	St2	18672736
	Ci_St2_2.fastq.gz		22705085
	Ci_St2_3.fastq.gz		29679524
	Ci_St4_1.fastq.gz	St4	19855604
	Ci_St4_2.fastq.gz		23544978
	Ci_St5_1.fastq.gz	St5	29911119
	Ci_St5_2.fastq.gz		19100389
	Ci_St6_1.fastq.gz	St6	30622625
	Ci_St6_2.fastq.gz		27054238
	Ci_St6_3.fastq.gz		31279518
	Ci_St8_1.fastq.gz	St8	24927292
	Ci_St8_2.fastq.gz		21990936
	Ci_St8_3.fastq.gz		23792116
	Ci_St10_1.fastq.gz	St10	27562230
	Ci_St10_2.fastq.gz		20625463
	Ci_St12_1.fastq.gz	St12	25514302
	Ci_St12_2.fastq.gz		28451958
	Ci_St14_1.fastq.gz	St14	29312019
	Ci_St14_2.fastq.gz		22368929
	Ci_St14_3.fastq.gz		28557638
	Ci_St16_1.fastq.gz	St16	20517635
	Ci_St16_2.fastq.gz		30370530
	Ci_St16_3.fastq.gz		23889015
	Ci_St19_1.fastq.gz	St19	22098164
	Ci_St19_2.fastq.gz		24925083
	Ci_St19_3.fastq.gz		23016936
	Ci_St22_1.fastq.gz	St22	19384368
	Ci_St22_2.fastq.gz		22189562
	Ci_St24_1.fastq.gz	St24	22444769
	Ci_St24_2.fastq.gz		25957872
	Ci_St24_3.fastq.gz		25957872
	Ci_St27_1.fastq.gz	St27	25254284
	Ci_St27_2.fastq.gz		22445122
	Ci_St29_1.fastq.gz	St29	33876676
	Ci_St29_2.fastq.gz		18941416
	Ci_St29_3.fastq.gz		24632914
	Ci_St35_1.fastq.gz	St35	20596331
	Ci_St35_2.fastq.gz		24273986
	Ci_St37_1.fastq.gz	St37	21267136
	Ci_St37_2.fastq.gz		21931843
	Ci_St38_1.fastq.gz	St38	25289615
	Ci_St38_2.fastq.gz		25202929
	Ci_St40_1.fastq.gz	St40	21342997
	Ci_St40_2.fastq.gz		26326454
	Ci_lateJuvenile_1.fastq.gz	lateJuvenile	23433230
	Ci_lateJuvenile_2.fastq.gz		26986933

## Sheet: Crassostrea gigas
Species	Samples	Figure label	Reads Number
Crassostrea gigas	Cg_E.fastq.gz	Cg_E	41953428
	Cg_TC.fastq.gz	Cg_TC	42319088
	Cg_FC.fastq.gz	Cg_FC	43013348
	Cg_EM.fastq.gz	Cg_EM	114156300
	Cg_M.fastq.gz	Cg_M	92072332
	Cg_B.fastq.gz	Cg_B	85464220
	Cg_RM.fastq.gz	Cg_RM	92615500
	Cg_FS.fastq.gz	Cg_FS	84966648
	Cg_EG.fastq.gz	Cg_EG	89377224
	Cg_G.fastq.gz	Cg_G	45567488
	Cg_T1.fastq.gz	Cg_T	62430448
	Cg_T2.fastq.gz		50084024
	Cg_T3.fastq.gz		48487176
	Cg_T4.fastq.gz		40138908
	Cg_T5.fastq.gz		46471880
	Cg_ED1.fastq.gz	Cg_ED	44458204
	Cg_ED2.fastq.gz		47789324
	Cg_D1.fastq.gz	Cg_D	41467036
	Cg_D2.fastq.gz		44905612
	Cg_D3.fastq.gz		43716756
	Cg_D4.fastq.gz		43782616
	Cg_D5.fastq.gz		42191800
	Cg_D6.fastq.gz		98939892
	Cg_D7.fastq.gz		65783764
	Cg_EU1.fastq.gz	Cg_EU	90539536
	Cg_EU2.fastq.gz		41414276
	Cg_U1.fastq.gz	Cg_U	96981632
	Cg_U2.fastq.gz		106593424
	Cg_U3.fastq.gz		46745628
	Cg_U4.fastq.gz		106003748
	Cg_U5.fastq.gz		43565132
	Cg_U6.fastq.gz		42337992
	Cg_LU1.fastq.gz	Cg_LU	81814768
	Cg_LU2.fastq.gz		41196884
	Cg_P1.fastq.gz	Cg_P	42524812
	Cg_P2.fastq.gz		64308032
	Cg_S.fastq.gz	Cg_S	59514632
	Cg_J.fastq.gz	Cg_J	68127868
