# Supplementary material for: Comparative Gene Analysis in Chordate Embryonic Development Reveals Co-existence of Von Baer’s and Haeckel’s Postulates
Source: Research Square preprint supplement (doi:10.21203/rs.3.rs-579345/v1), 2021-06-17
Supplement: Supplementary file 9 [file 99bf4721be4769fc12ad9afe.xlsx]

## Sheet: Pelodiscus sinensis
Supplementary Data 5. The list of continuous model genes for each species
ENSPSIG00000000005
ENSPSIG00000000094
ENSPSIG00000000199
ENSPSIG00000000218
ENSPSIG00000000330
ENSPSIG00000000335
ENSPSIG00000000363
ENSPSIG00000000374
ENSPSIG00000000416
ENSPSIG00000000475
ENSPSIG00000000549
ENSPSIG00000000565
ENSPSIG00000000569
ENSPSIG00000000583
ENSPSIG00000000709
ENSPSIG00000000714
ENSPSIG00000000736
ENSPSIG00000000749
ENSPSIG00000000860
ENSPSIG00000001006
ENSPSIG00000001109
ENSPSIG00000001112
ENSPSIG00000001134
ENSPSIG00000001170
ENSPSIG00000001377
ENSPSIG00000001445
ENSPSIG00000001519
ENSPSIG00000001527
ENSPSIG00000001535
ENSPSIG00000001674
ENSPSIG00000001716
ENSPSIG00000001756
ENSPSIG00000001820
ENSPSIG00000001910
ENSPSIG00000001931
ENSPSIG00000001939
ENSPSIG00000001964
ENSPSIG00000002025
ENSPSIG00000002082
ENSPSIG00000002083
ENSPSIG00000002084
ENSPSIG00000002096
ENSPSIG00000002100
ENSPSIG00000002124
ENSPSIG00000002142
ENSPSIG00000002143
ENSPSIG00000002149
ENSPSIG00000002170
ENSPSIG00000002179
ENSPSIG00000002181
ENSPSIG00000002228
ENSPSIG00000002230
ENSPSIG00000002267
ENSPSIG00000002273
ENSPSIG00000002285
ENSPSIG00000002286
ENSPSIG00000002288
ENSPSIG00000002314
ENSPSIG00000002328
ENSPSIG00000002335
ENSPSIG00000002353
ENSPSIG00000002359
ENSPSIG00000002373
ENSPSIG00000002377
ENSPSIG00000002397
ENSPSIG00000002443
ENSPSIG00000002502
ENSPSIG00000002505
ENSPSIG00000002527
ENSPSIG00000002534
ENSPSIG00000002540
ENSPSIG00000002557
ENSPSIG00000002563
ENSPSIG00000002564
ENSPSIG00000002574
ENSPSIG00000002579
ENSPSIG00000002616
ENSPSIG00000002626
ENSPSIG00000002627
ENSPSIG00000002629
ENSPSIG00000002631
ENSPSIG00000002676
ENSPSIG00000002703
ENSPSIG00000002712
ENSPSIG00000002737
ENSPSIG00000002740
ENSPSIG00000002742
ENSPSIG00000002746
ENSPSIG00000002761
ENSPSIG00000002763
ENSPSIG00000002765
ENSPSIG00000002773
ENSPSIG00000002778
ENSPSIG00000002790
ENSPSIG00000002794
ENSPSIG00000002803
ENSPSIG00000002815
ENSPSIG00000002832
ENSPSIG00000002847
ENSPSIG00000002864
ENSPSIG00000002889
ENSPSIG00000002894
ENSPSIG00000002903
ENSPSIG00000002914
ENSPSIG00000002928
ENSPSIG00000002967
ENSPSIG00000002975
ENSPSIG00000002985
ENSPSIG00000002993
ENSPSIG00000003044
ENSPSIG00000003067
ENSPSIG00000003077
ENSPSIG00000003088
ENSPSIG00000003092
ENSPSIG00000003098
ENSPSIG00000003112
ENSPSIG00000003129
ENSPSIG00000003141
ENSPSIG00000003148
ENSPSIG00000003158
ENSPSIG00000003166
ENSPSIG00000003171
ENSPSIG00000003178
ENSPSIG00000003195
ENSPSIG00000003206
ENSPSIG00000003241
ENSPSIG00000003258
ENSPSIG00000003272
ENSPSIG00000003276
ENSPSIG00000003288
ENSPSIG00000003289
ENSPSIG00000003292
ENSPSIG00000003315
ENSPSIG00000003348
ENSPSIG00000003349
ENSPSIG00000003351
ENSPSIG00000003354
ENSPSIG00000003361
ENSPSIG00000003368
ENSPSIG00000003418
ENSPSIG00000003440
ENSPSIG00000003451
ENSPSIG00000003457
ENSPSIG00000003482
ENSPSIG00000003492
ENSPSIG00000003505
ENSPSIG00000003513
ENSPSIG00000003519
ENSPSIG00000003535
ENSPSIG00000003546
ENSPSIG00000003552
ENSPSIG00000003561
ENSPSIG00000003562
ENSPSIG00000003573
ENSPSIG00000003582
ENSPSIG00000003594
ENSPSIG00000003614
ENSPSIG00000003645
ENSPSIG00000003647
ENSPSIG00000003655
ENSPSIG00000003657
ENSPSIG00000003673
ENSPSIG00000003686
ENSPSIG00000003711
ENSPSIG00000003718
ENSPSIG00000003720
ENSPSIG00000003726
ENSPSIG00000003729
ENSPSIG00000003746
ENSPSIG00000003747
ENSPSIG00000003752
ENSPSIG00000003760
ENSPSIG00000003765
ENSPSIG00000003768
ENSPSIG00000003787
ENSPSIG00000003792
ENSPSIG00000003796
ENSPSIG00000003857
ENSPSIG00000003861
ENSPSIG00000003895
ENSPSIG00000003898
ENSPSIG00000003907
ENSPSIG00000003927
ENSPSIG00000003934
ENSPSIG00000003942
ENSPSIG00000003964
ENSPSIG00000003970
ENSPSIG00000003972
ENSPSIG00000004005
ENSPSIG00000004010
ENSPSIG00000004035
ENSPSIG00000004046
ENSPSIG00000004066
ENSPSIG00000004075
ENSPSIG00000004082
ENSPSIG00000004083
ENSPSIG00000004085
ENSPSIG00000004089
ENSPSIG00000004093
ENSPSIG00000004095
ENSPSIG00000004114
ENSPSIG00000004123
ENSPSIG00000004143
ENSPSIG00000004178
ENSPSIG00000004221
ENSPSIG00000004238
ENSPSIG00000004240
ENSPSIG00000004266
ENSPSIG00000004269
ENSPSIG00000004273
ENSPSIG00000004275
ENSPSIG00000004277
ENSPSIG00000004319
ENSPSIG00000004323
ENSPSIG00000004326
ENSPSIG00000004332
ENSPSIG00000004360
ENSPSIG00000004363
ENSPSIG00000004373
ENSPSIG00000004392
ENSPSIG00000004402
ENSPSIG00000004404
ENSPSIG00000004413
ENSPSIG00000004427
ENSPSIG00000004448
ENSPSIG00000004452
ENSPSIG00000004458
ENSPSIG00000004486
ENSPSIG00000004504
ENSPSIG00000004505
ENSPSIG00000004513
ENSPSIG00000004514
ENSPSIG00000004516
ENSPSIG00000004537
ENSPSIG00000004548
ENSPSIG00000004576
ENSPSIG00000004593
ENSPSIG00000004599
ENSPSIG00000004615
ENSPSIG00000004618
ENSPSIG00000004624
ENSPSIG00000004628
ENSPSIG00000004637
ENSPSIG00000004654
ENSPSIG00000004661
ENSPSIG00000004672
ENSPSIG00000004693
ENSPSIG00000004701
ENSPSIG00000004702
ENSPSIG00000004704
ENSPSIG00000004708
ENSPSIG00000004712
ENSPSIG00000004721
ENSPSIG00000004732
ENSPSIG00000004735
ENSPSIG00000004760
ENSPSIG00000004775
ENSPSIG00000004792
ENSPSIG00000004801
ENSPSIG00000004802
ENSPSIG00000004814
ENSPSIG00000004840
ENSPSIG00000004842
ENSPSIG00000004848
ENSPSIG00000004859
ENSPSIG00000004860
ENSPSIG00000004871
ENSPSIG00000004881
ENSPSIG00000004901
ENSPSIG00000004908
ENSPSIG00000004916
ENSPSIG00000004917
ENSPSIG00000004936
ENSPSIG00000004949
ENSPSIG00000004954
ENSPSIG00000004994
ENSPSIG00000005002
ENSPSIG00000005006
ENSPSIG00000005009
ENSPSIG00000005050
ENSPSIG00000005054
ENSPSIG00000005060
ENSPSIG00000005073
ENSPSIG00000005096
ENSPSIG00000005111
ENSPSIG00000005126
ENSPSIG00000005136
ENSPSIG00000005159
ENSPSIG00000005168
ENSPSIG00000005200
ENSPSIG00000005210
ENSPSIG00000005213
ENSPSIG00000005216
ENSPSIG00000005233
ENSPSIG00000005237
ENSPSIG00000005238
ENSPSIG00000005241
ENSPSIG00000005253
ENSPSIG00000005254
ENSPSIG00000005262
ENSPSIG00000005269
ENSPSIG00000005270
ENSPSIG00000005282
ENSPSIG00000005286
ENSPSIG00000005305
ENSPSIG00000005327
ENSPSIG00000005343
ENSPSIG00000005349
ENSPSIG00000005357
ENSPSIG00000005365
ENSPSIG00000005372
ENSPSIG00000005377
ENSPSIG00000005388
ENSPSIG00000005400
ENSPSIG00000005417
ENSPSIG00000005452
ENSPSIG00000005462
ENSPSIG00000005485
ENSPSIG00000005486
ENSPSIG00000005489
ENSPSIG00000005491
ENSPSIG00000005515
ENSPSIG00000005518
ENSPSIG00000005528
ENSPSIG00000005535
ENSPSIG00000005540
ENSPSIG00000005541
ENSPSIG00000005545
ENSPSIG00000005574
ENSPSIG00000005599
ENSPSIG00000005663
ENSPSIG00000005674
ENSPSIG00000005687
ENSPSIG00000005690
ENSPSIG00000005697
ENSPSIG00000005700
ENSPSIG00000005717
ENSPSIG00000005739
ENSPSIG00000005753
ENSPSIG00000005769
ENSPSIG00000005798
ENSPSIG00000005815
ENSPSIG00000005824
ENSPSIG00000005827
ENSPSIG00000005849
ENSPSIG00000005855
ENSPSIG00000005857
ENSPSIG00000005861
ENSPSIG00000005874
ENSPSIG00000005879
ENSPSIG00000005898
ENSPSIG00000005928
ENSPSIG00000005937
ENSPSIG00000005973
ENSPSIG00000005974
ENSPSIG00000006005
ENSPSIG00000006136
ENSPSIG00000006141
ENSPSIG00000006196
ENSPSIG00000006198
ENSPSIG00000006240
ENSPSIG00000006252
ENSPSIG00000006253
ENSPSIG00000006258
ENSPSIG00000006259
ENSPSIG00000006289
ENSPSIG00000006312
ENSPSIG00000006334
ENSPSIG00000006360
ENSPSIG00000006364
ENSPSIG00000006419
ENSPSIG00000006428
ENSPSIG00000006438
ENSPSIG00000006451
ENSPSIG00000006453
ENSPSIG00000006454
ENSPSIG00000006455
ENSPSIG00000006461
ENSPSIG00000006462
ENSPSIG00000006465
ENSPSIG00000006469
ENSPSIG00000006481
ENSPSIG00000006484
ENSPSIG00000006494
ENSPSIG00000006510
ENSPSIG00000006513
ENSPSIG00000006520
ENSPSIG00000006523
ENSPSIG00000006530
ENSPSIG00000006537
ENSPSIG00000006568
ENSPSIG00000006571
ENSPSIG00000006573
ENSPSIG00000006634
ENSPSIG00000006652
ENSPSIG00000006670
ENSPSIG00000006680
ENSPSIG00000006684
ENSPSIG00000006685
ENSPSIG00000006691
ENSPSIG00000006704
ENSPSIG00000006709
ENSPSIG00000006714
ENSPSIG00000006725
ENSPSIG00000006728
ENSPSIG00000006731
ENSPSIG00000006734
ENSPSIG00000006743
ENSPSIG00000006745
ENSPSIG00000006760
ENSPSIG00000006766
ENSPSIG00000006768
ENSPSIG00000006771
ENSPSIG00000006781
ENSPSIG00000006788
ENSPSIG00000006798
ENSPSIG00000006806
ENSPSIG00000006827
ENSPSIG00000006845
ENSPSIG00000006848
ENSPSIG00000006854
ENSPSIG00000006856
ENSPSIG00000006880
ENSPSIG00000006883
ENSPSIG00000006891
ENSPSIG00000006897
ENSPSIG00000006899
ENSPSIG00000006929
ENSPSIG00000006946
ENSPSIG00000006949
ENSPSIG00000006964
ENSPSIG00000006983
ENSPSIG00000006985
ENSPSIG00000007009
ENSPSIG00000007014
ENSPSIG00000007031
ENSPSIG00000007033
ENSPSIG00000007041
ENSPSIG00000007062
ENSPSIG00000007065
ENSPSIG00000007101
ENSPSIG00000007113
ENSPSIG00000007132
ENSPSIG00000007159
ENSPSIG00000007206
ENSPSIG00000007216
ENSPSIG00000007222
ENSPSIG00000007278
ENSPSIG00000007287
ENSPSIG00000007290
ENSPSIG00000007309
ENSPSIG00000007313
ENSPSIG00000007326
ENSPSIG00000007333
ENSPSIG00000007342
ENSPSIG00000007349
ENSPSIG00000007372
ENSPSIG00000007390
ENSPSIG00000007399
ENSPSIG00000007420
ENSPSIG00000007426
ENSPSIG00000007446
ENSPSIG00000007448
ENSPSIG00000007454
ENSPSIG00000007455
ENSPSIG00000007481
ENSPSIG00000007491
ENSPSIG00000007501
ENSPSIG00000007506
ENSPSIG00000007524
ENSPSIG00000007526
ENSPSIG00000007527
ENSPSIG00000007533
ENSPSIG00000007540
ENSPSIG00000007544
ENSPSIG00000007552
ENSPSIG00000007559
ENSPSIG00000007573
ENSPSIG00000007618
ENSPSIG00000007651
ENSPSIG00000007674
ENSPSIG00000007688
ENSPSIG00000007706
ENSPSIG00000007707
ENSPSIG00000007709
ENSPSIG00000007712
ENSPSIG00000007713
ENSPSIG00000007723
ENSPSIG00000007736
ENSPSIG00000007754
ENSPSIG00000007763
ENSPSIG00000007778
ENSPSIG00000007815
ENSPSIG00000007835
ENSPSIG00000007849
ENSPSIG00000007855
ENSPSIG00000007864
ENSPSIG00000007876
ENSPSIG00000007879
ENSPSIG00000007880
ENSPSIG00000007892
ENSPSIG00000007897
ENSPSIG00000007927
ENSPSIG00000007929
ENSPSIG00000007933
ENSPSIG00000007940
ENSPSIG00000007948
ENSPSIG00000007961
ENSPSIG00000007973
ENSPSIG00000007976
ENSPSIG00000007988
ENSPSIG00000007995
ENSPSIG00000007996
ENSPSIG00000008002
ENSPSIG00000008005
ENSPSIG00000008054
ENSPSIG00000008063
ENSPSIG00000008091
ENSPSIG00000008103
ENSPSIG00000008108
ENSPSIG00000008136
ENSPSIG00000008138
ENSPSIG00000008143
ENSPSIG00000008150
ENSPSIG00000008193
ENSPSIG00000008201
ENSPSIG00000008202
ENSPSIG00000008224
ENSPSIG00000008229
ENSPSIG00000008242
ENSPSIG00000008244
ENSPSIG00000008291
ENSPSIG00000008301
ENSPSIG00000008326
ENSPSIG00000008336
ENSPSIG00000008346
ENSPSIG00000008352
ENSPSIG00000008362
ENSPSIG00000008382
ENSPSIG00000008392
ENSPSIG00000008397
ENSPSIG00000008414
ENSPSIG00000008423
ENSPSIG00000008449
ENSPSIG00000008476
ENSPSIG00000008477
ENSPSIG00000008545
ENSPSIG00000008547
ENSPSIG00000008548
ENSPSIG00000008591
ENSPSIG00000008595
ENSPSIG00000008596
ENSPSIG00000008613
ENSPSIG00000008621
ENSPSIG00000008624
ENSPSIG00000008658
ENSPSIG00000008679
ENSPSIG00000008691
ENSPSIG00000008719
ENSPSIG00000008722
ENSPSIG00000008737
ENSPSIG00000008742
ENSPSIG00000008749
ENSPSIG00000008755
ENSPSIG00000008762
ENSPSIG00000008763
ENSPSIG00000008775
ENSPSIG00000008803
ENSPSIG00000008811
ENSPSIG00000008822
ENSPSIG00000008830
ENSPSIG00000008869
ENSPSIG00000008875
ENSPSIG00000008884
ENSPSIG00000008885
ENSPSIG00000008888
ENSPSIG00000008896
ENSPSIG00000008924
ENSPSIG00000008927
ENSPSIG00000008939
ENSPSIG00000008951
ENSPSIG00000008953
ENSPSIG00000008959
ENSPSIG00000008968
ENSPSIG00000008970
ENSPSIG00000008983
ENSPSIG00000008994
ENSPSIG00000009000
ENSPSIG00000009009
ENSPSIG00000009027
ENSPSIG00000009041
ENSPSIG00000009066
ENSPSIG00000009077
ENSPSIG00000009082
ENSPSIG00000009089
ENSPSIG00000009100
ENSPSIG00000009115
ENSPSIG00000009148
ENSPSIG00000009158
ENSPSIG00000009166
ENSPSIG00000009176
ENSPSIG00000009187
ENSPSIG00000009191
ENSPSIG00000009211
ENSPSIG00000009221
ENSPSIG00000009225
ENSPSIG00000009257
ENSPSIG00000009262
ENSPSIG00000009292
ENSPSIG00000009300
ENSPSIG00000009301
ENSPSIG00000009306
ENSPSIG00000009315
ENSPSIG00000009340
ENSPSIG00000009360
ENSPSIG00000009384
ENSPSIG00000009397
ENSPSIG00000009401
ENSPSIG00000009404
ENSPSIG00000009405
ENSPSIG00000009419
ENSPSIG00000009422
ENSPSIG00000009430
ENSPSIG00000009435
ENSPSIG00000009469
ENSPSIG00000009472
ENSPSIG00000009512
ENSPSIG00000009523
ENSPSIG00000009527
ENSPSIG00000009531
ENSPSIG00000009538
ENSPSIG00000009539
ENSPSIG00000009545
ENSPSIG00000009565
ENSPSIG00000009566
ENSPSIG00000009586
ENSPSIG00000009618
ENSPSIG00000009624
ENSPSIG00000009634
ENSPSIG00000009643
ENSPSIG00000009661
ENSPSIG00000009662
ENSPSIG00000009669
ENSPSIG00000009691
ENSPSIG00000009709
ENSPSIG00000009717
ENSPSIG00000009746
ENSPSIG00000009763
ENSPSIG00000009767
ENSPSIG00000009775
ENSPSIG00000009788
ENSPSIG00000009792
ENSPSIG00000009802
ENSPSIG00000009805
ENSPSIG00000009819
ENSPSIG00000009825
ENSPSIG00000009837
ENSPSIG00000009885
ENSPSIG00000009945
ENSPSIG00000009963
ENSPSIG00000009965
ENSPSIG00000009966
ENSPSIG00000009986
ENSPSIG00000009987
ENSPSIG00000009990
ENSPSIG00000009992
ENSPSIG00000010002
ENSPSIG00000010040
ENSPSIG00000010048
ENSPSIG00000010051
ENSPSIG00000010052
ENSPSIG00000010103
ENSPSIG00000010113
ENSPSIG00000010133
ENSPSIG00000010134
ENSPSIG00000010169
ENSPSIG00000010170
ENSPSIG00000010184
ENSPSIG00000010210
ENSPSIG00000010213
ENSPSIG00000010216
ENSPSIG00000010255
ENSPSIG00000010265
ENSPSIG00000010266
ENSPSIG00000010271
ENSPSIG00000010309
ENSPSIG00000010312
ENSPSIG00000010353
ENSPSIG00000010357
ENSPSIG00000010377
ENSPSIG00000010384
ENSPSIG00000010385
ENSPSIG00000010407
ENSPSIG00000010409
ENSPSIG00000010413
ENSPSIG00000010416
ENSPSIG00000010437
ENSPSIG00000010471
ENSPSIG00000010475
ENSPSIG00000010515
ENSPSIG00000010538
ENSPSIG00000010544
ENSPSIG00000010556
ENSPSIG00000010566
ENSPSIG00000010575
ENSPSIG00000010581
ENSPSIG00000010582
ENSPSIG00000010586
ENSPSIG00000010609
ENSPSIG00000010612
ENSPSIG00000010615
ENSPSIG00000010617
ENSPSIG00000010619
ENSPSIG00000010625
ENSPSIG00000010632
ENSPSIG00000010640
ENSPSIG00000010652
ENSPSIG00000010653
ENSPSIG00000010655
ENSPSIG00000010679
ENSPSIG00000010690
ENSPSIG00000010694
ENSPSIG00000010713
ENSPSIG00000010725
ENSPSIG00000010739
ENSPSIG00000010742
ENSPSIG00000010746
ENSPSIG00000010761
ENSPSIG00000010768
ENSPSIG00000010770
ENSPSIG00000010771
ENSPSIG00000010783
ENSPSIG00000010787
ENSPSIG00000010799
ENSPSIG00000010823
ENSPSIG00000010831
ENSPSIG00000010844
ENSPSIG00000010857
ENSPSIG00000010864
ENSPSIG00000010884
ENSPSIG00000010885
ENSPSIG00000010891
ENSPSIG00000010898
ENSPSIG00000010900
ENSPSIG00000010902
ENSPSIG00000010916
ENSPSIG00000010930
ENSPSIG00000010950
ENSPSIG00000010954
ENSPSIG00000010979
ENSPSIG00000010989
ENSPSIG00000011002
ENSPSIG00000011007
ENSPSIG00000011028
ENSPSIG00000011046
ENSPSIG00000011050
ENSPSIG00000011057
ENSPSIG00000011093
ENSPSIG00000011095
ENSPSIG00000011100
ENSPSIG00000011106
ENSPSIG00000011115
ENSPSIG00000011116
ENSPSIG00000011117
ENSPSIG00000011125
ENSPSIG00000011135
ENSPSIG00000011138
ENSPSIG00000011139
ENSPSIG00000011162
ENSPSIG00000011173
ENSPSIG00000011177
ENSPSIG00000011182
ENSPSIG00000011187
ENSPSIG00000011206
ENSPSIG00000011210
ENSPSIG00000011212
ENSPSIG00000011217
ENSPSIG00000011223
ENSPSIG00000011239
ENSPSIG00000011240
ENSPSIG00000011258
ENSPSIG00000011284
ENSPSIG00000011311
ENSPSIG00000011314
ENSPSIG00000011345
ENSPSIG00000011348
ENSPSIG00000011351
ENSPSIG00000011383
ENSPSIG00000011403
ENSPSIG00000011409
ENSPSIG00000011416
ENSPSIG00000011450
ENSPSIG00000011477
ENSPSIG00000011479
ENSPSIG00000011512
ENSPSIG00000011514
ENSPSIG00000011529
ENSPSIG00000011532
ENSPSIG00000011533
ENSPSIG00000011549
ENSPSIG00000011595
ENSPSIG00000011608
ENSPSIG00000011661
ENSPSIG00000011668
ENSPSIG00000011674
ENSPSIG00000011694
ENSPSIG00000011695
ENSPSIG00000011703
ENSPSIG00000011711
ENSPSIG00000011734
ENSPSIG00000011742
ENSPSIG00000011748
ENSPSIG00000011751
ENSPSIG00000011773
ENSPSIG00000011779
ENSPSIG00000011787
ENSPSIG00000011792
ENSPSIG00000011805
ENSPSIG00000011818
ENSPSIG00000011824
ENSPSIG00000011828
ENSPSIG00000011832
ENSPSIG00000011863
ENSPSIG00000011871
ENSPSIG00000011879
ENSPSIG00000011880
ENSPSIG00000011905
ENSPSIG00000011912
ENSPSIG00000011924
ENSPSIG00000011931
ENSPSIG00000011946
ENSPSIG00000011953
ENSPSIG00000011961
ENSPSIG00000011970
ENSPSIG00000011991
ENSPSIG00000012004
ENSPSIG00000012020
ENSPSIG00000012023
ENSPSIG00000012030
ENSPSIG00000012056
ENSPSIG00000012064
ENSPSIG00000012086
ENSPSIG00000012087
ENSPSIG00000012104
ENSPSIG00000012106
ENSPSIG00000012107
ENSPSIG00000012120
ENSPSIG00000012138
ENSPSIG00000012148
ENSPSIG00000012169
ENSPSIG00000012170
ENSPSIG00000012172
ENSPSIG00000012175
ENSPSIG00000012186
ENSPSIG00000012188
ENSPSIG00000012189
ENSPSIG00000012200
ENSPSIG00000012222
ENSPSIG00000012231
ENSPSIG00000012250
ENSPSIG00000012268
ENSPSIG00000012269
ENSPSIG00000012289
ENSPSIG00000012328
ENSPSIG00000012333
ENSPSIG00000012349
ENSPSIG00000012369
ENSPSIG00000012381
ENSPSIG00000012384
ENSPSIG00000012389
ENSPSIG00000012393
ENSPSIG00000012403
ENSPSIG00000012414
ENSPSIG00000012419
ENSPSIG00000012430
ENSPSIG00000012435
ENSPSIG00000012493
ENSPSIG00000012494
ENSPSIG00000012519
ENSPSIG00000012523
ENSPSIG00000012526
ENSPSIG00000012527
ENSPSIG00000012552
ENSPSIG00000012566
ENSPSIG00000012573
ENSPSIG00000012656
ENSPSIG00000012680
ENSPSIG00000012686
ENSPSIG00000012688
ENSPSIG00000012692
ENSPSIG00000012701
ENSPSIG00000012711
ENSPSIG00000012725
ENSPSIG00000012728
ENSPSIG00000012746
ENSPSIG00000012764
ENSPSIG00000012783
ENSPSIG00000012810
ENSPSIG00000012836
ENSPSIG00000012843
ENSPSIG00000012848
ENSPSIG00000012850
ENSPSIG00000012860
ENSPSIG00000012873
ENSPSIG00000012889
ENSPSIG00000012913
ENSPSIG00000012919
ENSPSIG00000012925
ENSPSIG00000012935
ENSPSIG00000012936
ENSPSIG00000012946
ENSPSIG00000012975
ENSPSIG00000012978
ENSPSIG00000012979
ENSPSIG00000013004
ENSPSIG00000013033
ENSPSIG00000013046
ENSPSIG00000013050
ENSPSIG00000013062
ENSPSIG00000013064
ENSPSIG00000013067
ENSPSIG00000013076
ENSPSIG00000013079
ENSPSIG00000013087
ENSPSIG00000013121
ENSPSIG00000013142
ENSPSIG00000013159
ENSPSIG00000013171
ENSPSIG00000013184
ENSPSIG00000013187
ENSPSIG00000013211
ENSPSIG00000013213
ENSPSIG00000013219
ENSPSIG00000013227
ENSPSIG00000013232
ENSPSIG00000013266
ENSPSIG00000013336
ENSPSIG00000013338
ENSPSIG00000013362
ENSPSIG00000013370
ENSPSIG00000013374
ENSPSIG00000013381
ENSPSIG00000013391
ENSPSIG00000013418
ENSPSIG00000013425
ENSPSIG00000013437
ENSPSIG00000013443
ENSPSIG00000013470
ENSPSIG00000013472
ENSPSIG00000013480
ENSPSIG00000013483
ENSPSIG00000013519
ENSPSIG00000013526
ENSPSIG00000013554
ENSPSIG00000013558
ENSPSIG00000013566
ENSPSIG00000013594
ENSPSIG00000013597
ENSPSIG00000013607
ENSPSIG00000013609
ENSPSIG00000013619
ENSPSIG00000013628
ENSPSIG00000013639
ENSPSIG00000013644
ENSPSIG00000013650
ENSPSIG00000013667
ENSPSIG00000013679
ENSPSIG00000013720
ENSPSIG00000013730
ENSPSIG00000013732
ENSPSIG00000013736
ENSPSIG00000013764
ENSPSIG00000013765
ENSPSIG00000013772
ENSPSIG00000013790
ENSPSIG00000013799
ENSPSIG00000013810
ENSPSIG00000013815
ENSPSIG00000013816
ENSPSIG00000013834
ENSPSIG00000013837
ENSPSIG00000013847
ENSPSIG00000013858
ENSPSIG00000013861
ENSPSIG00000013876
ENSPSIG00000013885
ENSPSIG00000013888
ENSPSIG00000013890
ENSPSIG00000013895
ENSPSIG00000013907
ENSPSIG00000013911
ENSPSIG00000013944
ENSPSIG00000013950
ENSPSIG00000013954
ENSPSIG00000013961
ENSPSIG00000013972
ENSPSIG00000014007
ENSPSIG00000014009
ENSPSIG00000014014
ENSPSIG00000014043
ENSPSIG00000014089
ENSPSIG00000014103
ENSPSIG00000014115
ENSPSIG00000014122
ENSPSIG00000014146
ENSPSIG00000014147
ENSPSIG00000014154
ENSPSIG00000014160
ENSPSIG00000014163
ENSPSIG00000014187
ENSPSIG00000014189
ENSPSIG00000014200
ENSPSIG00000014207
ENSPSIG00000014215
ENSPSIG00000014228
ENSPSIG00000014235
ENSPSIG00000014268
ENSPSIG00000014275
ENSPSIG00000014288
ENSPSIG00000014293
ENSPSIG00000014299
ENSPSIG00000014301
ENSPSIG00000014315
ENSPSIG00000014331
ENSPSIG00000014337
ENSPSIG00000014349
ENSPSIG00000014374
ENSPSIG00000014381
ENSPSIG00000014385
ENSPSIG00000014389
ENSPSIG00000014417
ENSPSIG00000014419
ENSPSIG00000014431
ENSPSIG00000014454
ENSPSIG00000014460
ENSPSIG00000014469
ENSPSIG00000014474
ENSPSIG00000014477
ENSPSIG00000014513
ENSPSIG00000014516
ENSPSIG00000014526
ENSPSIG00000014530
ENSPSIG00000014535
ENSPSIG00000014544
ENSPSIG00000014576
ENSPSIG00000014590
ENSPSIG00000014608
ENSPSIG00000014628
ENSPSIG00000014631
ENSPSIG00000014633
ENSPSIG00000014649
ENSPSIG00000014656
ENSPSIG00000014657
ENSPSIG00000014662
ENSPSIG00000014681
ENSPSIG00000014690
ENSPSIG00000014714
ENSPSIG00000014719
ENSPSIG00000014720
ENSPSIG00000014757
ENSPSIG00000014760
ENSPSIG00000014763
ENSPSIG00000014792
ENSPSIG00000014804
ENSPSIG00000014847
ENSPSIG00000014850
ENSPSIG00000014871
ENSPSIG00000014877
ENSPSIG00000014882
ENSPSIG00000014890
ENSPSIG00000014928
ENSPSIG00000014936
ENSPSIG00000014937
ENSPSIG00000014951
ENSPSIG00000014957
ENSPSIG00000014968
ENSPSIG00000015000
ENSPSIG00000015045
ENSPSIG00000015049
ENSPSIG00000015089
ENSPSIG00000015098
ENSPSIG00000015113
ENSPSIG00000015135
ENSPSIG00000015178
ENSPSIG00000015205
ENSPSIG00000015214
ENSPSIG00000015215
ENSPSIG00000015224
ENSPSIG00000015226
ENSPSIG00000015236
ENSPSIG00000015249
ENSPSIG00000015257
ENSPSIG00000015283
ENSPSIG00000015286
ENSPSIG00000015288
ENSPSIG00000015324
ENSPSIG00000015327
ENSPSIG00000015333
ENSPSIG00000015357
ENSPSIG00000015369
ENSPSIG00000015403
ENSPSIG00000015406
ENSPSIG00000015429
ENSPSIG00000015466
ENSPSIG00000015467
ENSPSIG00000015497
ENSPSIG00000015499
ENSPSIG00000015518
ENSPSIG00000015582
ENSPSIG00000015625
ENSPSIG00000015632
ENSPSIG00000015636
ENSPSIG00000015650
ENSPSIG00000015653
ENSPSIG00000015668
ENSPSIG00000015687
ENSPSIG00000015696
ENSPSIG00000015711
ENSPSIG00000015712
ENSPSIG00000015725
ENSPSIG00000015731
ENSPSIG00000015734
ENSPSIG00000015737
ENSPSIG00000015774
ENSPSIG00000015776
ENSPSIG00000015778
ENSPSIG00000015789
ENSPSIG00000015805
ENSPSIG00000015807
ENSPSIG00000015830
ENSPSIG00000015843
ENSPSIG00000015878
ENSPSIG00000015890
ENSPSIG00000015913
ENSPSIG00000015915
ENSPSIG00000015923
ENSPSIG00000015928
ENSPSIG00000015932
ENSPSIG00000015933
ENSPSIG00000015938
ENSPSIG00000015939
ENSPSIG00000015945
ENSPSIG00000015958
ENSPSIG00000015973
ENSPSIG00000015981
ENSPSIG00000015999
ENSPSIG00000016007
ENSPSIG00000016025
ENSPSIG00000016027
ENSPSIG00000016029
ENSPSIG00000016041
ENSPSIG00000016074
ENSPSIG00000016089
ENSPSIG00000016092
ENSPSIG00000016108
ENSPSIG00000016122
ENSPSIG00000016135
ENSPSIG00000016167
ENSPSIG00000016173
ENSPSIG00000016213
ENSPSIG00000016290
ENSPSIG00000016311
ENSPSIG00000016320
ENSPSIG00000016322
ENSPSIG00000016324
ENSPSIG00000016328
ENSPSIG00000016364
ENSPSIG00000016367
ENSPSIG00000016374
ENSPSIG00000016378
ENSPSIG00000016379
ENSPSIG00000016383
ENSPSIG00000016428
ENSPSIG00000016437
ENSPSIG00000016443
ENSPSIG00000016484
ENSPSIG00000016491
ENSPSIG00000016493
ENSPSIG00000016501
ENSPSIG00000016513
ENSPSIG00000016528
ENSPSIG00000016549
ENSPSIG00000016567
ENSPSIG00000016593
ENSPSIG00000016611
ENSPSIG00000016614
ENSPSIG00000016637
ENSPSIG00000016674
ENSPSIG00000016682
ENSPSIG00000016689
ENSPSIG00000016691
ENSPSIG00000016695
ENSPSIG00000016696
ENSPSIG00000016715
ENSPSIG00000016746
ENSPSIG00000016748
ENSPSIG00000016769
ENSPSIG00000016798
ENSPSIG00000016812
ENSPSIG00000016836
ENSPSIG00000016837
ENSPSIG00000016862
ENSPSIG00000016875
ENSPSIG00000016876
ENSPSIG00000016895
ENSPSIG00000016897
ENSPSIG00000016899
ENSPSIG00000016936
ENSPSIG00000016959
ENSPSIG00000016960
ENSPSIG00000016972
ENSPSIG00000016996
ENSPSIG00000017031
ENSPSIG00000017043
ENSPSIG00000017054
ENSPSIG00000017060
ENSPSIG00000017063
ENSPSIG00000017064
ENSPSIG00000017067
ENSPSIG00000017073
ENSPSIG00000017076
ENSPSIG00000017103
ENSPSIG00000017107
ENSPSIG00000017108
ENSPSIG00000017113
ENSPSIG00000017120
ENSPSIG00000017140
ENSPSIG00000017141
ENSPSIG00000017150
ENSPSIG00000017164
ENSPSIG00000017171
ENSPSIG00000017178
ENSPSIG00000017197
ENSPSIG00000017226
ENSPSIG00000017241
ENSPSIG00000017251
ENSPSIG00000017272
ENSPSIG00000017279
ENSPSIG00000017287
ENSPSIG00000017310
ENSPSIG00000017316
ENSPSIG00000017365
ENSPSIG00000017397
ENSPSIG00000017414
ENSPSIG00000017417
ENSPSIG00000017423
ENSPSIG00000017427
ENSPSIG00000017453
ENSPSIG00000017455
ENSPSIG00000017460
ENSPSIG00000017468
ENSPSIG00000017482
ENSPSIG00000017498
ENSPSIG00000017507
ENSPSIG00000017512
ENSPSIG00000017521
ENSPSIG00000017545
ENSPSIG00000017558
ENSPSIG00000017560
ENSPSIG00000017589
ENSPSIG00000017595
ENSPSIG00000017598
ENSPSIG00000017608
ENSPSIG00000017630
ENSPSIG00000017652
ENSPSIG00000017691
ENSPSIG00000017694
ENSPSIG00000017705
ENSPSIG00000017706
ENSPSIG00000017721
ENSPSIG00000017779
ENSPSIG00000017783
ENSPSIG00000017804
ENSPSIG00000017817
ENSPSIG00000017837
ENSPSIG00000017847
ENSPSIG00000017852
ENSPSIG00000017859
ENSPSIG00000017861
ENSPSIG00000017878
ENSPSIG00000017886
ENSPSIG00000017887
ENSPSIG00000017903
ENSPSIG00000017954
ENSPSIG00000017957
ENSPSIG00000017965
ENSPSIG00000018005
ENSPSIG00000018006
ENSPSIG00000018011
ENSPSIG00000018013
ENSPSIG00000018015
ENSPSIG00000018023
ENSPSIG00000018069
ENSPSIG00000018079
ENSPSIG00000018087
ENSPSIG00000018111
ENSPSIG00000018113
ENSPSIG00000018114
ENSPSIG00000018117
ENSPSIG00000018142
ENSPSIG00000018144
ENSPSIG00000018155
ENSPSIG00000018157
ENSPSIG00000018174
ENSPSIG00000018186
ENSPSIG00000018200
ENSPSIG00000018207
ENSPSIG00000018211
ENSPSIG00000018220
ENSPSIG00000018266
ENSPSIG00000019306

## Sheet: Gallus gallus
ENSGALG00000000040
ENSGALG00000000049
ENSGALG00000000151
ENSGALG00000000168
ENSGALG00000000169
ENSGALG00000000201
ENSGALG00000000230
ENSGALG00000000332
ENSGALG00000000372
ENSGALG00000000399
ENSGALG00000000421
ENSGALG00000000463
ENSGALG00000000596
ENSGALG00000000625
ENSGALG00000000638
ENSGALG00000000673
ENSGALG00000000695
ENSGALG00000000708
ENSGALG00000000710
ENSGALG00000000775
ENSGALG00000000777
ENSGALG00000000780
ENSGALG00000000783
ENSGALG00000000802
ENSGALG00000000812
ENSGALG00000000880
ENSGALG00000000890
ENSGALG00000000891
ENSGALG00000000894
ENSGALG00000000939
ENSGALG00000001058
ENSGALG00000001063
ENSGALG00000001079
ENSGALG00000001100
ENSGALG00000001101
ENSGALG00000001130
ENSGALG00000001169
ENSGALG00000001207
ENSGALG00000001263
ENSGALG00000001267
ENSGALG00000001276
ENSGALG00000001283
ENSGALG00000001387
ENSGALG00000001515
ENSGALG00000001561
ENSGALG00000001603
ENSGALG00000001611
ENSGALG00000001684
ENSGALG00000001719
ENSGALG00000001744
ENSGALG00000001758
ENSGALG00000001860
ENSGALG00000001918
ENSGALG00000001938
ENSGALG00000001949
ENSGALG00000001966
ENSGALG00000001975
ENSGALG00000001976
ENSGALG00000001998
ENSGALG00000002007
ENSGALG00000002023
ENSGALG00000002064
ENSGALG00000002076
ENSGALG00000002119
ENSGALG00000002134
ENSGALG00000002151
ENSGALG00000002249
ENSGALG00000002280
ENSGALG00000002282
ENSGALG00000002338
ENSGALG00000002369
ENSGALG00000002522
ENSGALG00000002544
ENSGALG00000002557
ENSGALG00000002591
ENSGALG00000002624
ENSGALG00000002637
ENSGALG00000002663
ENSGALG00000002678
ENSGALG00000002725
ENSGALG00000002764
ENSGALG00000002781
ENSGALG00000002830
ENSGALG00000002835
ENSGALG00000002859
ENSGALG00000002888
ENSGALG00000002898
ENSGALG00000002900
ENSGALG00000002907
ENSGALG00000002910
ENSGALG00000002946
ENSGALG00000002959
ENSGALG00000002993
ENSGALG00000003047
ENSGALG00000003053
ENSGALG00000003091
ENSGALG00000003137
ENSGALG00000003143
ENSGALG00000003163
ENSGALG00000003204
ENSGALG00000003206
ENSGALG00000003227
ENSGALG00000003294
ENSGALG00000003297
ENSGALG00000003324
ENSGALG00000003405
ENSGALG00000003426
ENSGALG00000003479
ENSGALG00000003515
ENSGALG00000003548
ENSGALG00000003550
ENSGALG00000003551
ENSGALG00000003554
ENSGALG00000003641
ENSGALG00000003665
ENSGALG00000003669
ENSGALG00000003675
ENSGALG00000003719
ENSGALG00000003738
ENSGALG00000003747
ENSGALG00000003759
ENSGALG00000003819
ENSGALG00000003852
ENSGALG00000003870
ENSGALG00000003901
ENSGALG00000003904
ENSGALG00000003922
ENSGALG00000004004
ENSGALG00000004043
ENSGALG00000004098
ENSGALG00000004121
ENSGALG00000004142
ENSGALG00000004146
ENSGALG00000004160
ENSGALG00000004187
ENSGALG00000004190
ENSGALG00000004195
ENSGALG00000004267
ENSGALG00000004290
ENSGALG00000004295
ENSGALG00000004343
ENSGALG00000004361
ENSGALG00000004364
ENSGALG00000004378
ENSGALG00000004379
ENSGALG00000004515
ENSGALG00000004573
ENSGALG00000004637
ENSGALG00000004669
ENSGALG00000004695
ENSGALG00000004701
ENSGALG00000004744
ENSGALG00000004771
ENSGALG00000004858
ENSGALG00000004882
ENSGALG00000005012
ENSGALG00000005054
ENSGALG00000005061
ENSGALG00000005090
ENSGALG00000005093
ENSGALG00000005102
ENSGALG00000005203
ENSGALG00000005284
ENSGALG00000005297
ENSGALG00000005302
ENSGALG00000005308
ENSGALG00000005358
ENSGALG00000005407
ENSGALG00000005415
ENSGALG00000005459
ENSGALG00000005579
ENSGALG00000005618
ENSGALG00000005651
ENSGALG00000005702
ENSGALG00000005888
ENSGALG00000005927
ENSGALG00000005955
ENSGALG00000005991
ENSGALG00000006016
ENSGALG00000006025
ENSGALG00000006050
ENSGALG00000006075
ENSGALG00000006122
ENSGALG00000006134
ENSGALG00000006153
ENSGALG00000006190
ENSGALG00000006240
ENSGALG00000006245
ENSGALG00000006336
ENSGALG00000006346
ENSGALG00000006395
ENSGALG00000006411
ENSGALG00000006439
ENSGALG00000006446
ENSGALG00000006490
ENSGALG00000006507
ENSGALG00000006520
ENSGALG00000006524
ENSGALG00000006532
ENSGALG00000006576
ENSGALG00000006588
ENSGALG00000006591
ENSGALG00000006593
ENSGALG00000006680
ENSGALG00000006694
ENSGALG00000006710
ENSGALG00000006715
ENSGALG00000006725
ENSGALG00000006736
ENSGALG00000006751
ENSGALG00000006756
ENSGALG00000006782
ENSGALG00000006790
ENSGALG00000006835
ENSGALG00000006851
ENSGALG00000006886
ENSGALG00000006915
ENSGALG00000006949
ENSGALG00000006957
ENSGALG00000006978
ENSGALG00000006981
ENSGALG00000007039
ENSGALG00000007063
ENSGALG00000007090
ENSGALG00000007100
ENSGALG00000007106
ENSGALG00000007158
ENSGALG00000007226
ENSGALG00000007242
ENSGALG00000007269
ENSGALG00000007286
ENSGALG00000007307
ENSGALG00000007326
ENSGALG00000007354
ENSGALG00000007364
ENSGALG00000007458
ENSGALG00000007468
ENSGALG00000007537
ENSGALG00000007555
ENSGALG00000007594
ENSGALG00000007609
ENSGALG00000007758
ENSGALG00000007769
ENSGALG00000007808
ENSGALG00000007809
ENSGALG00000007882
ENSGALG00000007956
ENSGALG00000008010
ENSGALG00000008011
ENSGALG00000008041
ENSGALG00000008054
ENSGALG00000008057
ENSGALG00000008058
ENSGALG00000008123
ENSGALG00000008233
ENSGALG00000008262
ENSGALG00000008289
ENSGALG00000008290
ENSGALG00000008337
ENSGALG00000008361
ENSGALG00000008452
ENSGALG00000008461
ENSGALG00000008469
ENSGALG00000008473
ENSGALG00000008585
ENSGALG00000008607
ENSGALG00000008608
ENSGALG00000008654
ENSGALG00000008659
ENSGALG00000008678
ENSGALG00000008708
ENSGALG00000008716
ENSGALG00000008720
ENSGALG00000008764
ENSGALG00000008840
ENSGALG00000008845
ENSGALG00000008886
ENSGALG00000008890
ENSGALG00000008961
ENSGALG00000008992
ENSGALG00000009002
ENSGALG00000009011
ENSGALG00000009029
ENSGALG00000009032
ENSGALG00000009062
ENSGALG00000009064
ENSGALG00000009071
ENSGALG00000009098
ENSGALG00000009176
ENSGALG00000009214
ENSGALG00000009228
ENSGALG00000009229
ENSGALG00000009234
ENSGALG00000009250
ENSGALG00000009266
ENSGALG00000009270
ENSGALG00000009315
ENSGALG00000009404
ENSGALG00000009451
ENSGALG00000009455
ENSGALG00000009467
ENSGALG00000009475
ENSGALG00000009489
ENSGALG00000009491
ENSGALG00000009500
ENSGALG00000009513
ENSGALG00000009523
ENSGALG00000009549
ENSGALG00000009551
ENSGALG00000009553
ENSGALG00000009568
ENSGALG00000009569
ENSGALG00000009634
ENSGALG00000009677
ENSGALG00000009700
ENSGALG00000009722
ENSGALG00000009843
ENSGALG00000009853
ENSGALG00000009866
ENSGALG00000009867
ENSGALG00000009873
ENSGALG00000009920
ENSGALG00000009927
ENSGALG00000009947
ENSGALG00000009963
ENSGALG00000010001
ENSGALG00000010054
ENSGALG00000010079
ENSGALG00000010139
ENSGALG00000010374
ENSGALG00000010391
ENSGALG00000010406
ENSGALG00000010564
ENSGALG00000010598
ENSGALG00000010603
ENSGALG00000010671
ENSGALG00000010692
ENSGALG00000010747
ENSGALG00000010783
ENSGALG00000010787
ENSGALG00000010836
ENSGALG00000010853
ENSGALG00000010925
ENSGALG00000010999
ENSGALG00000011038
ENSGALG00000011041
ENSGALG00000011069
ENSGALG00000011149
ENSGALG00000011155
ENSGALG00000011169
ENSGALG00000011176
ENSGALG00000011205
ENSGALG00000011207
ENSGALG00000011211
ENSGALG00000011241
ENSGALG00000011244
ENSGALG00000011266
ENSGALG00000011270
ENSGALG00000011294
ENSGALG00000011387
ENSGALG00000011435
ENSGALG00000011436
ENSGALG00000011504
ENSGALG00000011506
ENSGALG00000011509
ENSGALG00000011510
ENSGALG00000011513
ENSGALG00000011521
ENSGALG00000011590
ENSGALG00000011604
ENSGALG00000011612
ENSGALG00000011613
ENSGALG00000011706
ENSGALG00000011725
ENSGALG00000011784
ENSGALG00000011810
ENSGALG00000011813
ENSGALG00000011834
ENSGALG00000011837
ENSGALG00000011894
ENSGALG00000011898
ENSGALG00000011973
ENSGALG00000011986
ENSGALG00000011991
ENSGALG00000012010
ENSGALG00000012030
ENSGALG00000012034
ENSGALG00000012051
ENSGALG00000012105
ENSGALG00000012115
ENSGALG00000012178
ENSGALG00000012183
ENSGALG00000012199
ENSGALG00000012250
ENSGALG00000012390
ENSGALG00000012437
ENSGALG00000012515
ENSGALG00000012541
ENSGALG00000012610
ENSGALG00000012613
ENSGALG00000012688
ENSGALG00000012689
ENSGALG00000012709
ENSGALG00000012744
ENSGALG00000013182
ENSGALG00000013204
ENSGALG00000013254
ENSGALG00000013362
ENSGALG00000013383
ENSGALG00000013408
ENSGALG00000013464
ENSGALG00000013535
ENSGALG00000013547
ENSGALG00000013602
ENSGALG00000013603
ENSGALG00000013606
ENSGALG00000013627
ENSGALG00000013635
ENSGALG00000013678
ENSGALG00000013695
ENSGALG00000013824
ENSGALG00000013872
ENSGALG00000013886
ENSGALG00000013940
ENSGALG00000014042
ENSGALG00000014083
ENSGALG00000014116
ENSGALG00000014185
ENSGALG00000014209
ENSGALG00000014227
ENSGALG00000014295
ENSGALG00000014331
ENSGALG00000014372
ENSGALG00000014395
ENSGALG00000014405
ENSGALG00000014425
ENSGALG00000014466
ENSGALG00000014471
ENSGALG00000014477
ENSGALG00000014485
ENSGALG00000014542
ENSGALG00000014565
ENSGALG00000014568
ENSGALG00000014573
ENSGALG00000014639
ENSGALG00000014664
ENSGALG00000014691
ENSGALG00000014696
ENSGALG00000014713
ENSGALG00000014729
ENSGALG00000014740
ENSGALG00000014753
ENSGALG00000014771
ENSGALG00000014787
ENSGALG00000014788
ENSGALG00000014791
ENSGALG00000014858
ENSGALG00000014961
ENSGALG00000014967
ENSGALG00000014991
ENSGALG00000015096
ENSGALG00000015111
ENSGALG00000015205
ENSGALG00000015271
ENSGALG00000015289
ENSGALG00000015310
ENSGALG00000015313
ENSGALG00000015352
ENSGALG00000015353
ENSGALG00000015360
ENSGALG00000015415
ENSGALG00000015446
ENSGALG00000015537
ENSGALG00000015542
ENSGALG00000015545
ENSGALG00000015564
ENSGALG00000015574
ENSGALG00000015644
ENSGALG00000015667
ENSGALG00000015681
ENSGALG00000015689
ENSGALG00000015691
ENSGALG00000015755
ENSGALG00000015835
ENSGALG00000015903
ENSGALG00000015929
ENSGALG00000015984
ENSGALG00000015993
ENSGALG00000016038
ENSGALG00000016045
ENSGALG00000016058
ENSGALG00000016071
ENSGALG00000016080
ENSGALG00000016089
ENSGALG00000016090
ENSGALG00000016095
ENSGALG00000016108
ENSGALG00000016139
ENSGALG00000016145
ENSGALG00000016164
ENSGALG00000016165
ENSGALG00000016198
ENSGALG00000016223
ENSGALG00000016259
ENSGALG00000016276
ENSGALG00000016282
ENSGALG00000016312
ENSGALG00000016342
ENSGALG00000016455
ENSGALG00000016459
ENSGALG00000016509
ENSGALG00000016524
ENSGALG00000016560
ENSGALG00000016569
ENSGALG00000016570
ENSGALG00000016574
ENSGALG00000016617
ENSGALG00000016692
ENSGALG00000016746
ENSGALG00000016800
ENSGALG00000016822
ENSGALG00000016843
ENSGALG00000016844
ENSGALG00000016867
ENSGALG00000016868
ENSGALG00000016881
ENSGALG00000016890
ENSGALG00000016893
ENSGALG00000016934
ENSGALG00000016975
ENSGALG00000016985
ENSGALG00000017027
ENSGALG00000017075
ENSGALG00000017135
ENSGALG00000017155
ENSGALG00000017156
ENSGALG00000017239
ENSGALG00000017272
ENSGALG00000017323
ENSGALG00000017345
ENSGALG00000017357
ENSGALG00000017405
ENSGALG00000019756
ENSGALG00000019967
ENSGALG00000020003
ENSGALG00000020199
ENSGALG00000020561
ENSGALG00000020742
ENSGALG00000020788
ENSGALG00000021047
ENSGALG00000021362
ENSGALG00000021542
ENSGALG00000021567
ENSGALG00000021637
ENSGALG00000022622
ENSGALG00000022715
ENSGALG00000022926
ENSGALG00000023042
ENSGALG00000023348
ENSGALG00000023420
ENSGALG00000023580
ENSGALG00000023647
ENSGALG00000023786
ENSGALG00000023876
ENSGALG00000023988
ENSGALG00000024049
ENSGALG00000024076
ENSGALG00000024077
ENSGALG00000024128
ENSGALG00000024326
ENSGALG00000024411
ENSGALG00000025774
ENSGALG00000025818
ENSGALG00000025842
ENSGALG00000026027
ENSGALG00000026042
ENSGALG00000026049
ENSGALG00000026153
ENSGALG00000026192
ENSGALG00000026223
ENSGALG00000026426
ENSGALG00000026536
ENSGALG00000026542
ENSGALG00000026553
ENSGALG00000026572
ENSGALG00000026582
ENSGALG00000026590
ENSGALG00000026651
ENSGALG00000026661
ENSGALG00000026704
ENSGALG00000026761
ENSGALG00000026790
ENSGALG00000026825
ENSGALG00000026838
ENSGALG00000026928
ENSGALG00000026999
ENSGALG00000027109
ENSGALG00000027165
ENSGALG00000027234
ENSGALG00000027237
ENSGALG00000027243
ENSGALG00000027311
ENSGALG00000027315
ENSGALG00000027326
ENSGALG00000027409
ENSGALG00000027471
ENSGALG00000027506
ENSGALG00000027774
ENSGALG00000027786
ENSGALG00000027887
ENSGALG00000027903
ENSGALG00000027908
ENSGALG00000028035
ENSGALG00000028056
ENSGALG00000028065
ENSGALG00000028091
ENSGALG00000028102
ENSGALG00000028147
ENSGALG00000028186
ENSGALG00000028415
ENSGALG00000028423
ENSGALG00000028443
ENSGALG00000028517
ENSGALG00000028530
ENSGALG00000028536
ENSGALG00000028551
ENSGALG00000028631
ENSGALG00000028812
ENSGALG00000028871
ENSGALG00000028908
ENSGALG00000028951
ENSGALG00000028979
ENSGALG00000029001
ENSGALG00000029011
ENSGALG00000029102
ENSGALG00000029130
ENSGALG00000029142
ENSGALG00000029174

## Sheet: Xenopus laevis
XeXenL6RMv10000028m
XeXenL6RMv10000041m
XeXenL6RMv10000102m
XeXenL6RMv10000222m
XeXenL6RMv10000241m
XeXenL6RMv10000254m
XeXenL6RMv10000274m
XeXenL6RMv10000292m
XeXenL6RMv10000391m
XeXenL6RMv10000430m
XeXenL6RMv10000440m
XeXenL6RMv10000540m
XeXenL6RMv10000564m
XeXenL6RMv10000604m
XeXenL6RMv10000631m
XeXenL6RMv10000642m
XeXenL6RMv10000718m
XeXenL6RMv10000727m
XeXenL6RMv10000760m
XeXenL6RMv10000844m
XeXenL6RMv10000902m
XeXenL6RMv10000961m
XeXenL6RMv10001017m
XeXenL6RMv10001087m
XeXenL6RMv10001093m
XeXenL6RMv10001280m
XeXenL6RMv10001410m
XeXenL6RMv10001436m
XeXenL6RMv10001459m
XeXenL6RMv10001461m
XeXenL6RMv10001502m
XeXenL6RMv10001507m
XeXenL6RMv10001592m
XeXenL6RMv10001602m
XeXenL6RMv10001645m
XeXenL6RMv10001673m
XeXenL6RMv10001694m
XeXenL6RMv10001752m
XeXenL6RMv10001819m
XeXenL6RMv10001925m
XeXenL6RMv10002121m
XeXenL6RMv10002167m
XeXenL6RMv10002173m
XeXenL6RMv10002247m
XeXenL6RMv10002495m
XeXenL6RMv10002575m
XeXenL6RMv10002665m
XeXenL6RMv10002697m
XeXenL6RMv10002714m
XeXenL6RMv10002733m
XeXenL6RMv10002776m
XeXenL6RMv10002810m
XeXenL6RMv10002844m
XeXenL6RMv10002862m
XeXenL6RMv10002916m
XeXenL6RMv10002981m
XeXenL6RMv10002983m
XeXenL6RMv10002990m
XeXenL6RMv10003079m
XeXenL6RMv10003263m
XeXenL6RMv10003391m
XeXenL6RMv10003401m
XeXenL6RMv10003524m
XeXenL6RMv10003623m
XeXenL6RMv10003845m
XeXenL6RMv10003980m
XeXenL6RMv10004041m
XeXenL6RMv10004070m
XeXenL6RMv10004146m
XeXenL6RMv10004237m
XeXenL6RMv10004245m
XeXenL6RMv10004420m
XeXenL6RMv10004452m
XeXenL6RMv10004470m
XeXenL6RMv10004495m
XeXenL6RMv10004530m
XeXenL6RMv10004569m
XeXenL6RMv10004579m
XeXenL6RMv10004611m
XeXenL6RMv10004884m
XeXenL6RMv10004890m
XeXenL6RMv10004895m
XeXenL6RMv10004923m
XeXenL6RMv10004999m
XeXenL6RMv10005040m
XeXenL6RMv10005042m
XeXenL6RMv10005100m
XeXenL6RMv10005171m
XeXenL6RMv10005244m
XeXenL6RMv10005245m
XeXenL6RMv10005327m
XeXenL6RMv10005411m
XeXenL6RMv10005435m
XeXenL6RMv10005437m
XeXenL6RMv10005683m
XeXenL6RMv10005925m
XeXenL6RMv10005933m
XeXenL6RMv10006030m
XeXenL6RMv10006142m
XeXenL6RMv10006250m
XeXenL6RMv10006277m
XeXenL6RMv10006416m
XeXenL6RMv10006418m
XeXenL6RMv10006424m
XeXenL6RMv10006473m
XeXenL6RMv10006545m
XeXenL6RMv10006577m
XeXenL6RMv10006599m
XeXenL6RMv10006701m
XeXenL6RMv10006867m
XeXenL6RMv10006883m
XeXenL6RMv10006927m
XeXenL6RMv10006996m
XeXenL6RMv10007081m
XeXenL6RMv10007102m
XeXenL6RMv10007133m
XeXenL6RMv10007171m
XeXenL6RMv10007254m
XeXenL6RMv10007256m
XeXenL6RMv10007291m
XeXenL6RMv10007402m
XeXenL6RMv10007448m
XeXenL6RMv10007572m
XeXenL6RMv10007609m
XeXenL6RMv10007658m
XeXenL6RMv10007690m
XeXenL6RMv10007725m
XeXenL6RMv10007784m
XeXenL6RMv10007824m
XeXenL6RMv10007860m
XeXenL6RMv10007922m
XeXenL6RMv10007934m
XeXenL6RMv10008076m
XeXenL6RMv10008096m
XeXenL6RMv10008214m
XeXenL6RMv10008419m
XeXenL6RMv10008437m
XeXenL6RMv10008493m
XeXenL6RMv10008542m
XeXenL6RMv10008628m
XeXenL6RMv10008650m
XeXenL6RMv10008660m
XeXenL6RMv10008687m
XeXenL6RMv10008715m
XeXenL6RMv10008776m
XeXenL6RMv10008801m
XeXenL6RMv10008832m
XeXenL6RMv10009000m
XeXenL6RMv10009019m
XeXenL6RMv10009093m
XeXenL6RMv10009131m
XeXenL6RMv10009146m
XeXenL6RMv10009164m
XeXenL6RMv10009171m
XeXenL6RMv10009176m
XeXenL6RMv10009192m
XeXenL6RMv10009274m
XeXenL6RMv10009309m
XeXenL6RMv10009356m
XeXenL6RMv10009685m
XeXenL6RMv10009690m
XeXenL6RMv10009727m
XeXenL6RMv10009818m
XeXenL6RMv10009852m
XeXenL6RMv10009958m
XeXenL6RMv10010011m
XeXenL6RMv10010053m
XeXenL6RMv10010057m
XeXenL6RMv10010126m
XeXenL6RMv10010198m
XeXenL6RMv10010206m
XeXenL6RMv10010311m
XeXenL6RMv10010312m
XeXenL6RMv10010371m
XeXenL6RMv10010440m
XeXenL6RMv10010446m
XeXenL6RMv10010523m
XeXenL6RMv10010590m
XeXenL6RMv10010638m
XeXenL6RMv10010667m
XeXenL6RMv10010722m
XeXenL6RMv10010780m
XeXenL6RMv10010876m
XeXenL6RMv10010894m
XeXenL6RMv10011133m
XeXenL6RMv10011134m
XeXenL6RMv10011212m
XeXenL6RMv10011216m
XeXenL6RMv10011261m
XeXenL6RMv10011289m
XeXenL6RMv10011313m
XeXenL6RMv10011342m
XeXenL6RMv10011378m
XeXenL6RMv10011381m
XeXenL6RMv10011453m
XeXenL6RMv10011546m
XeXenL6RMv10011580m
XeXenL6RMv10011591m
XeXenL6RMv10011702m
XeXenL6RMv10011705m
XeXenL6RMv10011767m
XeXenL6RMv10011835m
XeXenL6RMv10011880m
XeXenL6RMv10011884m
XeXenL6RMv10011895m
XeXenL6RMv10011903m
XeXenL6RMv10012104m
XeXenL6RMv10012160m
XeXenL6RMv10012161m
XeXenL6RMv10012195m
XeXenL6RMv10012251m
XeXenL6RMv10012275m
XeXenL6RMv10012287m
XeXenL6RMv10012316m
XeXenL6RMv10012431m
XeXenL6RMv10012512m
XeXenL6RMv10012513m
XeXenL6RMv10012537m
XeXenL6RMv10012612m
XeXenL6RMv10012820m
XeXenL6RMv10012837m
XeXenL6RMv10012851m
XeXenL6RMv10012884m
XeXenL6RMv10012930m
XeXenL6RMv10012976m
XeXenL6RMv10012978m
XeXenL6RMv10012980m
XeXenL6RMv10013052m
XeXenL6RMv10013091m
XeXenL6RMv10013122m
XeXenL6RMv10013193m
XeXenL6RMv10013202m
XeXenL6RMv10013271m
XeXenL6RMv10013303m
XeXenL6RMv10013354m
XeXenL6RMv10013357m
XeXenL6RMv10013359m
XeXenL6RMv10013427m
XeXenL6RMv10013556m
XeXenL6RMv10013761m
XeXenL6RMv10013796m
XeXenL6RMv10013872m
XeXenL6RMv10013879m
XeXenL6RMv10013896m
XeXenL6RMv10013972m
XeXenL6RMv10013978m
XeXenL6RMv10013992m
XeXenL6RMv10014029m
XeXenL6RMv10014033m
XeXenL6RMv10014271m
XeXenL6RMv10014292m
XeXenL6RMv10014311m
XeXenL6RMv10014342m
XeXenL6RMv10014376m
XeXenL6RMv10014414m
XeXenL6RMv10014443m
XeXenL6RMv10014463m
XeXenL6RMv10014650m
XeXenL6RMv10014654m
XeXenL6RMv10014657m
XeXenL6RMv10014785m
XeXenL6RMv10014879m
XeXenL6RMv10014895m
XeXenL6RMv10015037m
XeXenL6RMv10015156m
XeXenL6RMv10015232m
XeXenL6RMv10015391m
XeXenL6RMv10015410m
XeXenL6RMv10015412m
XeXenL6RMv10015419m
XeXenL6RMv10015481m
XeXenL6RMv10015523m
XeXenL6RMv10015754m
XeXenL6RMv10015832m
XeXenL6RMv10016072m
XeXenL6RMv10016111m
XeXenL6RMv10016114m
XeXenL6RMv10016131m
XeXenL6RMv10016146m
XeXenL6RMv10016205m
XeXenL6RMv10016230m
XeXenL6RMv10016244m
XeXenL6RMv10016277m
XeXenL6RMv10016290m
XeXenL6RMv10016316m
XeXenL6RMv10016350m
XeXenL6RMv10016360m
XeXenL6RMv10016489m
XeXenL6RMv10016528m
XeXenL6RMv10016533m
XeXenL6RMv10016544m
XeXenL6RMv10016781m
XeXenL6RMv10016789m
XeXenL6RMv10016798m
XeXenL6RMv10016873m
XeXenL6RMv10016984m
XeXenL6RMv10017039m
XeXenL6RMv10017194m
XeXenL6RMv10017467m
XeXenL6RMv10017476m
XeXenL6RMv10017494m
XeXenL6RMv10017566m
XeXenL6RMv10017612m
XeXenL6RMv10017633m
XeXenL6RMv10017638m
XeXenL6RMv10017690m
XeXenL6RMv10017693m
XeXenL6RMv10017753m
XeXenL6RMv10017852m
XeXenL6RMv10017930m
XeXenL6RMv10018031m
XeXenL6RMv10018226m
XeXenL6RMv10018227m
XeXenL6RMv10018307m
XeXenL6RMv10018462m
XeXenL6RMv10018537m
XeXenL6RMv10018616m
XeXenL6RMv10018647m
XeXenL6RMv10018734m
XeXenL6RMv10018816m
XeXenL6RMv10018939m
XeXenL6RMv10018943m
XeXenL6RMv10018969m
XeXenL6RMv10019135m
XeXenL6RMv10019188m
XeXenL6RMv10019243m
XeXenL6RMv10019260m
XeXenL6RMv10019265m
XeXenL6RMv10019286m
XeXenL6RMv10019304m
XeXenL6RMv10019311m
XeXenL6RMv10019312m
XeXenL6RMv10019426m
XeXenL6RMv10019491m
XeXenL6RMv10019529m
XeXenL6RMv10019610m
XeXenL6RMv10019616m
XeXenL6RMv10019679m
XeXenL6RMv10019704m
XeXenL6RMv10019760m
XeXenL6RMv10019817m
XeXenL6RMv10019863m
XeXenL6RMv10019935m
XeXenL6RMv10019939m
XeXenL6RMv10019959m
XeXenL6RMv10019975m
XeXenL6RMv10020055m
XeXenL6RMv10020123m
XeXenL6RMv10020164m
XeXenL6RMv10020316m
XeXenL6RMv10020324m
XeXenL6RMv10020421m
XeXenL6RMv10020535m
XeXenL6RMv10020577m
XeXenL6RMv10020602m
XeXenL6RMv10020798m
XeXenL6RMv10020925m
XeXenL6RMv10020957m
XeXenL6RMv10020967m
XeXenL6RMv10020972m
XeXenL6RMv10020974m
XeXenL6RMv10020979m
XeXenL6RMv10021002m
XeXenL6RMv10021018m
XeXenL6RMv10021082m
XeXenL6RMv10021110m
XeXenL6RMv10021142m
XeXenL6RMv10021143m
XeXenL6RMv10021159m
XeXenL6RMv10021204m
XeXenL6RMv10021314m
XeXenL6RMv10021334m
XeXenL6RMv10021345m
XeXenL6RMv10021404m
XeXenL6RMv10021436m
XeXenL6RMv10021442m
XeXenL6RMv10021446m
XeXenL6RMv10021484m
XeXenL6RMv10021488m
XeXenL6RMv10021499m
XeXenL6RMv10021564m
XeXenL6RMv10021569m
XeXenL6RMv10021574m
XeXenL6RMv10021588m
XeXenL6RMv10021620m
XeXenL6RMv10021690m
XeXenL6RMv10021832m
XeXenL6RMv10021846m
XeXenL6RMv10021854m
XeXenL6RMv10021877m
XeXenL6RMv10021899m
XeXenL6RMv10021975m
XeXenL6RMv10021983m
XeXenL6RMv10021993m
XeXenL6RMv10022145m
XeXenL6RMv10022172m
XeXenL6RMv10022176m
XeXenL6RMv10022438m
XeXenL6RMv10022537m
XeXenL6RMv10022691m
XeXenL6RMv10022766m
XeXenL6RMv10022823m
XeXenL6RMv10022869m
XeXenL6RMv10022925m
XeXenL6RMv10023005m
XeXenL6RMv10023102m
XeXenL6RMv10023108m
XeXenL6RMv10023123m
XeXenL6RMv10023128m
XeXenL6RMv10023151m
XeXenL6RMv10023181m
XeXenL6RMv10023239m
XeXenL6RMv10023251m
XeXenL6RMv10023252m
XeXenL6RMv10023261m
XeXenL6RMv10023359m
XeXenL6RMv10023383m
XeXenL6RMv10023454m
XeXenL6RMv10023530m
XeXenL6RMv10023647m
XeXenL6RMv10023867m
XeXenL6RMv10023910m
XeXenL6RMv10024008m
XeXenL6RMv10024009m
XeXenL6RMv10024040m
XeXenL6RMv10024217m
XeXenL6RMv10024258m
XeXenL6RMv10024275m
XeXenL6RMv10024328m
XeXenL6RMv10024333m
XeXenL6RMv10024525m
XeXenL6RMv10024562m
XeXenL6RMv10024609m
XeXenL6RMv10024703m
XeXenL6RMv10024704m
XeXenL6RMv10024730m
XeXenL6RMv10024908m
XeXenL6RMv10024965m
XeXenL6RMv10024989m
XeXenL6RMv10025019m
XeXenL6RMv10025079m
XeXenL6RMv10025111m
XeXenL6RMv10025117m
XeXenL6RMv10025225m
XeXenL6RMv10025314m
XeXenL6RMv10025349m
XeXenL6RMv10025456m
XeXenL6RMv10025538m
XeXenL6RMv10025745m
XeXenL6RMv10025887m
XeXenL6RMv10026004m
XeXenL6RMv10026055m
XeXenL6RMv10026113m
XeXenL6RMv10026157m
XeXenL6RMv10026336m
XeXenL6RMv10026380m
XeXenL6RMv10026394m
XeXenL6RMv10026502m
XeXenL6RMv10026571m
XeXenL6RMv10026651m
XeXenL6RMv10026851m
XeXenL6RMv10026852m
XeXenL6RMv10026893m
XeXenL6RMv10026915m
XeXenL6RMv10026981m
XeXenL6RMv10027073m
XeXenL6RMv10027105m
XeXenL6RMv10027114m
XeXenL6RMv10027118m
XeXenL6RMv10027202m
XeXenL6RMv10027233m
XeXenL6RMv10027235m
XeXenL6RMv10027239m
XeXenL6RMv10027259m
XeXenL6RMv10027281m
XeXenL6RMv10027337m
XeXenL6RMv10027436m
XeXenL6RMv10027444m
XeXenL6RMv10027623m
XeXenL6RMv10027632m
XeXenL6RMv10027709m
XeXenL6RMv10027734m
XeXenL6RMv10027743m
XeXenL6RMv10027747m
XeXenL6RMv10027761m
XeXenL6RMv10027835m
XeXenL6RMv10027856m
XeXenL6RMv10027917m
XeXenL6RMv10027955m
XeXenL6RMv10027986m
XeXenL6RMv10028078m
XeXenL6RMv10028112m
XeXenL6RMv10028118m
XeXenL6RMv10028129m
XeXenL6RMv10028133m
XeXenL6RMv10028212m
XeXenL6RMv10028250m
XeXenL6RMv10028256m
XeXenL6RMv10028294m
XeXenL6RMv10028333m
XeXenL6RMv10028341m
XeXenL6RMv10028385m
XeXenL6RMv10028435m
XeXenL6RMv10028438m
XeXenL6RMv10028721m
XeXenL6RMv10028723m
XeXenL6RMv10028837m
XeXenL6RMv10029165m
XeXenL6RMv10029296m
XeXenL6RMv10029313m
XeXenL6RMv10029346m
XeXenL6RMv10029359m
XeXenL6RMv10029578m
XeXenL6RMv10029663m
XeXenL6RMv10029669m
XeXenL6RMv10029672m
XeXenL6RMv10029767m
XeXenL6RMv10029866m
XeXenL6RMv10029890m
XeXenL6RMv10030000m
XeXenL6RMv10030102m
XeXenL6RMv10030418m
XeXenL6RMv10030464m
XeXenL6RMv10030513m
XeXenL6RMv10030571m
XeXenL6RMv10030678m
XeXenL6RMv10030828m
XeXenL6RMv10030842m
XeXenL6RMv10030934m
XeXenL6RMv10031047m
XeXenL6RMv10031121m
XeXenL6RMv10031208m
XeXenL6RMv10031255m
XeXenL6RMv10031275m
XeXenL6RMv10031344m
XeXenL6RMv10031387m
XeXenL6RMv10031401m
XeXenL6RMv10031449m
XeXenL6RMv10031467m
XeXenL6RMv10031469m
XeXenL6RMv10031564m
XeXenL6RMv10031597m
XeXenL6RMv10031629m
XeXenL6RMv10031829m
XeXenL6RMv10032083m
XeXenL6RMv10032142m
XeXenL6RMv10032164m
XeXenL6RMv10032232m
XeXenL6RMv10032421m
XeXenL6RMv10032444m
XeXenL6RMv10032561m
XeXenL6RMv10032684m
XeXenL6RMv10032700m
XeXenL6RMv10032789m
XeXenL6RMv10032830m
XeXenL6RMv10032896m
XeXenL6RMv10032989m
XeXenL6RMv10033103m
XeXenL6RMv10033125m
XeXenL6RMv10033157m
XeXenL6RMv10033282m
XeXenL6RMv10033340m
XeXenL6RMv10033395m
XeXenL6RMv10033550m
XeXenL6RMv10033625m
XeXenL6RMv10033659m
XeXenL6RMv10033704m
XeXenL6RMv10033718m
XeXenL6RMv10033791m
XeXenL6RMv10033944m
XeXenL6RMv10033977m
XeXenL6RMv10034037m
XeXenL6RMv10034049m
XeXenL6RMv10034152m
XeXenL6RMv10034159m
XeXenL6RMv10034239m
XeXenL6RMv10034340m
XeXenL6RMv10034390m
XeXenL6RMv10034513m
XeXenL6RMv10034597m
XeXenL6RMv10034725m
XeXenL6RMv10034729m
XeXenL6RMv10034820m
XeXenL6RMv10034985m
XeXenL6RMv10034987m
XeXenL6RMv10034989m
XeXenL6RMv10035010m
XeXenL6RMv10035068m
XeXenL6RMv10035179m
XeXenL6RMv10035196m
XeXenL6RMv10035198m
XeXenL6RMv10035252m
XeXenL6RMv10035285m
XeXenL6RMv10035317m
XeXenL6RMv10035327m
XeXenL6RMv10035329m
XeXenL6RMv10035340m
XeXenL6RMv10035389m
XeXenL6RMv10035391m
XeXenL6RMv10035394m
XeXenL6RMv10035402m
XeXenL6RMv10035405m
XeXenL6RMv10035486m
XeXenL6RMv10035497m
XeXenL6RMv10035565m
XeXenL6RMv10035588m
XeXenL6RMv10035599m
XeXenL6RMv10035614m
XeXenL6RMv10035663m
XeXenL6RMv10035718m
XeXenL6RMv10035841m
XeXenL6RMv10035964m
XeXenL6RMv10035976m
XeXenL6RMv10035983m
XeXenL6RMv10036004m
XeXenL6RMv10036057m
XeXenL6RMv10036078m
XeXenL6RMv10036136m
XeXenL6RMv10036216m
XeXenL6RMv10036246m
XeXenL6RMv10036251m
XeXenL6RMv10036292m
XeXenL6RMv10036298m
XeXenL6RMv10036573m
XeXenL6RMv10036630m
XeXenL6RMv10036799m
XeXenL6RMv10036837m
XeXenL6RMv10036877m
XeXenL6RMv10036893m
XeXenL6RMv10036963m
XeXenL6RMv10037079m
XeXenL6RMv10037134m
XeXenL6RMv10037181m
XeXenL6RMv10037214m
XeXenL6RMv10037243m
XeXenL6RMv10037325m
XeXenL6RMv10037432m
XeXenL6RMv10037468m
XeXenL6RMv10037521m
XeXenL6RMv10037553m
XeXenL6RMv10037568m
XeXenL6RMv10037666m
XeXenL6RMv10037696m
XeXenL6RMv10037750m
XeXenL6RMv10037800m
XeXenL6RMv10037808m
XeXenL6RMv10037936m
XeXenL6RMv10038060m
XeXenL6RMv10038062m
XeXenL6RMv10038101m
XeXenL6RMv10038102m
XeXenL6RMv10038120m
XeXenL6RMv10038123m
XeXenL6RMv10038197m
XeXenL6RMv10038232m
XeXenL6RMv10038245m
XeXenL6RMv10038249m
XeXenL6RMv10038258m
XeXenL6RMv10038392m
XeXenL6RMv10038395m
XeXenL6RMv10038410m
XeXenL6RMv10038515m
XeXenL6RMv10038618m
XeXenL6RMv10038639m
XeXenL6RMv10038787m
XeXenL6RMv10038812m
XeXenL6RMv10038849m
XeXenL6RMv10038962m
XeXenL6RMv10039096m
XeXenL6RMv10039101m
XeXenL6RMv10039259m
XeXenL6RMv10039481m
XeXenL6RMv10039675m
XeXenL6RMv10039713m
XeXenL6RMv10039846m
XeXenL6RMv10039985m
XeXenL6RMv10040019m
XeXenL6RMv10040022m
XeXenL6RMv10040095m
XeXenL6RMv10040096m
XeXenL6RMv10040107m
XeXenL6RMv10040168m
XeXenL6RMv10040176m
XeXenL6RMv10040186m
XeXenL6RMv10040228m
XeXenL6RMv10040252m
XeXenL6RMv10040267m
XeXenL6RMv10040306m
XeXenL6RMv10040348m
XeXenL6RMv10040391m
XeXenL6RMv10040426m
XeXenL6RMv10040517m
XeXenL6RMv10040518m
XeXenL6RMv10040519m
XeXenL6RMv10040565m
XeXenL6RMv10040584m
XeXenL6RMv10040662m
XeXenL6RMv10040691m
XeXenL6RMv10040733m
XeXenL6RMv10040734m
XeXenL6RMv10040742m
XeXenL6RMv10040811m
XeXenL6RMv10040814m
XeXenL6RMv10040948m
XeXenL6RMv10041057m
XeXenL6RMv10041100m
XeXenL6RMv10041191m
XeXenL6RMv10041236m
XeXenL6RMv10041241m
XeXenL6RMv10041321m
XeXenL6RMv10041354m
XeXenL6RMv10041373m
XeXenL6RMv10041544m
XeXenL6RMv10041606m
XeXenL6RMv10041635m
XeXenL6RMv10041657m
XeXenL6RMv10041750m
XeXenL6RMv10041766m
XeXenL6RMv10041832m
XeXenL6RMv10041981m
XeXenL6RMv10042037m
XeXenL6RMv10042081m
XeXenL6RMv10042165m
XeXenL6RMv10042266m
XeXenL6RMv10042270m
XeXenL6RMv10042330m
XeXenL6RMv10042360m
XeXenL6RMv10042370m
XeXenL6RMv10042402m
XeXenL6RMv10042416m
XeXenL6RMv10042515m
XeXenL6RMv10042528m
XeXenL6RMv10042541m
XeXenL6RMv10042593m
XeXenL6RMv10042681m
XeXenL6RMv10042722m
XeXenL6RMv10042784m
XeXenL6RMv10042943m
XeXenL6RMv10042957m
XeXenL6RMv10043010m
XeXenL6RMv10043105m
XeXenL6RMv10043115m
XeXenL6RMv10043120m
XeXenL6RMv10043127m
XeXenL6RMv10043212m
XeXenL6RMv10043271m
XeXenL6RMv10043311m
XeXenL6RMv10043324m
XeXenL6RMv10043326m
XeXenL6RMv10043350m
XeXenL6RMv10043351m
XeXenL6RMv10043414m
XeXenL6RMv10043467m
XeXenL6RMv10043468m
XeXenL6RMv10043476m
XeXenL6RMv10043548m
XeXenL6RMv10043567m
XeXenL6RMv10043635m
XeXenL6RMv10043639m
XeXenL6RMv10043667m
XeXenL6RMv10043763m
XeXenL6RMv10043800m
XeXenL6RMv10043865m
XeXenL6RMv10043867m
XeXenL6RMv10043891m
XeXenL6RMv10043908m
XeXenL6RMv10043952m
XeXenL6RMv10043965m
XeXenL6RMv10044126m
XeXenL6RMv10044138m
XeXenL6RMv10044247m
XeXenL6RMv10044262m
XeXenL6RMv10044364m
XeXenL6RMv10044444m
XeXenL6RMv10044461m
XeXenL6RMv10044479m
XeXenL6RMv10044572m
XeXenL6RMv10044578m
XeXenL6RMv10044616m
XeXenL6RMv10044800m
XeXenL6RMv10044922m
XeXenL6RMv10044953m
XeXenL6RMv10044956m
XeXenL6RMv10044993m
XeXenL6RMv10045016m
XeXenL6RMv10045025m
XeXenL6RMv10045046m
XeXenL6RMv10045073m
XeXenL6RMv10045274m
XeXenL6RMv10045302m
XeXenL6RMv10045388m
XeXenL6RMv10045434m
XeXenL6RMv10045454m
XeXenL6RMv10045520m
XeXenL6RMv10045553m
XeXenL6RMv10045661m
XeXenL6RMv10045729m
XeXenL6RMv10045812m
XeXenL6RMv10045871m
XeXenL6RMv10045941m
XeXenL6RMv10045982m
XeXenL6RMv10046010m
XeXenL6RMv10046025m
XeXenL6RMv10046166m
XeXenL6RMv10046186m
XeXenL6RMv10046187m
XeXenL6RMv10046332m
XeXenL6RMv10046404m
XeXenL6RMv10046406m
XeXenL6RMv10046407m
XeXenL6RMv10046408m
XeXenL6RMv10046420m
XeXenL6RMv10046492m
XeXenL6RMv10046509m
XeXenL6RMv10046512m
XeXenL6RMv10046639m
XeXenL6RMv10046711m
XeXenL6RMv10046781m
XeXenL6RMv10046866m
XeXenL6RMv10046874m
XeXenL6RMv10046890m
XeXenL6RMv10046933m
XeXenL6RMv10047091m
XeXenL6RMv10047100m
XeXenL6RMv10047129m
XeXenL6RMv10047261m
XeXenL6RMv10047354m
XeXenL6RMv10047399m
XeXenL6RMv10047500m
XeXenL6RMv10047511m
XeXenL6RMv10047515m
XeXenL6RMv10047562m
XeXenL6RMv10047659m
XeXenL6RMv10047682m
XeXenL6RMv10047784m
XeXenL6RMv10047847m
XeXenL6RMv10047947m
XeXenL6RMv10047979m
XeXenL6RMv10048019m
XeXenL6RMv10048226m
XeXenL6RMv10048268m
XeXenL6RMv10048289m
XeXenL6RMv10048292m
XeXenL6RMv10048304m
XeXenL6RMv10048359m
XeXenL6RMv10048390m
XeXenL6RMv10048405m
XeXenL6RMv10048490m
XeXenL6RMv10048540m
XeXenL6RMv10048555m
XeXenL6RMv10048668m
XeXenL6RMv10048752m
XeXenL6RMv10048864m
XeXenL6RMv10049046m
XeXenL6RMv10049137m
XeXenL6RMv10049198m
XeXenL6RMv10049290m
XeXenL6RMv10049295m
XeXenL6RMv10049366m
XeXenL6RMv10049483m
XeXenL6RMv10049530m
XeXenL6RMv10049563m
XeXenL6RMv10049638m
XeXenL6RMv10049698m
XeXenL6RMv10049719m
XeXenL6RMv10049756m
XeXenL6RMv10049773m
XeXenL6RMv10049892m
XeXenL6RMv10049904m
XeXenL6RMv10049943m
XeXenL6RMv10049994m
XeXenL6RMv10049998m
XeXenL6RMv10050070m
XeXenL6RMv10050071m
XeXenL6RMv10050129m
XeXenL6RMv10050139m
XeXenL6RMv10050154m
XeXenL6RMv10050171m
XeXenL6RMv10050184m
XeXenL6RMv10050353m
XeXenL6RMv10050415m
XeXenL6RMv10050432m
XeXenL6RMv10050436m
XeXenL6RMv10050457m
XeXenL6RMv10050488m
XeXenL6RMv10050531m
XeXenL6RMv10050554m
XeXenL6RMv10050669m
XeXenL6RMv10050712m
XeXenL6RMv10050800m
XeXenL6RMv10050865m
XeXenL6RMv10050959m
XeXenL6RMv10051036m
XeXenL6RMv10051210m
XeXenL6RMv10051214m
XeXenL6RMv10051256m
XeXenL6RMv10051381m
XeXenL6RMv10051636m
XeXenL6RMv10051667m
XeXenL6RMv10051764m
XeXenL6RMv10051827m
XeXenL6RMv10051840m
XeXenL6RMv10051862m
XeXenL6RMv10051876m
XeXenL6RMv10051923m
XeXenL6RMv10051934m
XeXenL6RMv10051951m
XeXenL6RMv10052056m
XeXenL6RMv10052084m
XeXenL6RMv10052107m
XeXenL6RMv10052151m
XeXenL6RMv10052155m
XeXenL6RMv10052219m
XeXenL6RMv10052283m
XeXenL6RMv10052349m
XeXenL6RMv10052409m
XeXenL6RMv10052438m
XeXenL6RMv10052566m
XeXenL6RMv10052567m
XeXenL6RMv10052575m
XeXenL6RMv10052594m
XeXenL6RMv10052664m
XeXenL6RMv10052675m
XeXenL6RMv10052682m
XeXenL6RMv10052698m
XeXenL6RMv10052726m
XeXenL6RMv10052812m
XeXenL6RMv10052814m
XeXenL6RMv10052954m
XeXenL6RMv10052959m
XeXenL6RMv10052994m
XeXenL6RMv10053027m
XeXenL6RMv10053122m
XeXenL6RMv10053182m
XeXenL6RMv10053204m
XeXenL6RMv10053345m
XeXenL6RMv10053357m
XeXenL6RMv10053415m
XeXenL6RMv10053479m
XeXenL6RMv10053513m
XeXenL6RMv10053517m
XeXenL6RMv10053565m
XeXenL6RMv10053591m
XeXenL6RMv10053636m
XeXenL6RMv10053698m
XeXenL6RMv10053735m
XeXenL6RMv10054019m
XeXenL6RMv10054111m
XeXenL6RMv10054123m
XeXenL6RMv10054166m
XeXenL6RMv10054228m
XeXenL6RMv10054261m
XeXenL6RMv10054312m
XeXenL6RMv10054329m
XeXenL6RMv10054393m
XeXenL6RMv10054451m
XeXenL6RMv10054544m
XeXenL6RMv10054646m
XeXenL6RMv10054709m
XeXenL6RMv10054716m
XeXenL6RMv10054791m
XeXenL6RMv10054992m
XeXenL6RMv10055212m
XeXenL6RMv10055249m
XeXenL6RMv10055259m
XeXenL6RMv10055265m
XeXenL6RMv10055288m
XeXenL6RMv10055454m
XeXenL6RMv10055489m
XeXenL6RMv10055524m
XeXenL6RMv10055628m
XeXenL6RMv10055643m
XeXenL6RMv10055676m
XeXenL6RMv10055701m
XeXenL6RMv10055708m
XeXenL6RMv10055713m
XeXenL6RMv10055726m

## Sheet: Xenopus tropicalis
ENSXETG00000000014
ENSXETG00000000037
ENSXETG00000000056
ENSXETG00000000081
ENSXETG00000000088
ENSXETG00000000138
ENSXETG00000000210
ENSXETG00000000298
ENSXETG00000000316
ENSXETG00000000331
ENSXETG00000000396
ENSXETG00000000401
ENSXETG00000000455
ENSXETG00000000456
ENSXETG00000000457
ENSXETG00000000459
ENSXETG00000000466
ENSXETG00000000518
ENSXETG00000000598
ENSXETG00000000638
ENSXETG00000000667
ENSXETG00000000668
ENSXETG00000000679
ENSXETG00000000707
ENSXETG00000000720
ENSXETG00000000724
ENSXETG00000000732
ENSXETG00000000783
ENSXETG00000000786
ENSXETG00000000853
ENSXETG00000000896
ENSXETG00000000953
ENSXETG00000000957
ENSXETG00000000962
ENSXETG00000000973
ENSXETG00000000986
ENSXETG00000001031
ENSXETG00000001112
ENSXETG00000001154
ENSXETG00000001177
ENSXETG00000001210
ENSXETG00000001212
ENSXETG00000001223
ENSXETG00000001245
ENSXETG00000001249
ENSXETG00000001272
ENSXETG00000001335
ENSXETG00000001356
ENSXETG00000001366
ENSXETG00000001445
ENSXETG00000001478
ENSXETG00000001541
ENSXETG00000001672
ENSXETG00000001704
ENSXETG00000001725
ENSXETG00000001734
ENSXETG00000001756
ENSXETG00000001763
ENSXETG00000001859
ENSXETG00000001861
ENSXETG00000001866
ENSXETG00000001886
ENSXETG00000001913
ENSXETG00000001931
ENSXETG00000001932
ENSXETG00000001938
ENSXETG00000001982
ENSXETG00000002000
ENSXETG00000002074
ENSXETG00000002112
ENSXETG00000002122
ENSXETG00000002150
ENSXETG00000002230
ENSXETG00000002263
ENSXETG00000002264
ENSXETG00000002324
ENSXETG00000002431
ENSXETG00000002515
ENSXETG00000002525
ENSXETG00000002548
ENSXETG00000002566
ENSXETG00000002602
ENSXETG00000002635
ENSXETG00000002637
ENSXETG00000002746
ENSXETG00000002750
ENSXETG00000002758
ENSXETG00000002846
ENSXETG00000002852
ENSXETG00000002872
ENSXETG00000002882
ENSXETG00000002887
ENSXETG00000002919
ENSXETG00000002939
ENSXETG00000002976
ENSXETG00000002985
ENSXETG00000002996
ENSXETG00000003004
ENSXETG00000003033
ENSXETG00000003043
ENSXETG00000003066
ENSXETG00000003071
ENSXETG00000003090
ENSXETG00000003092
ENSXETG00000003121
ENSXETG00000003126
ENSXETG00000003135
ENSXETG00000003146
ENSXETG00000003149
ENSXETG00000003152
ENSXETG00000003155
ENSXETG00000003191
ENSXETG00000003194
ENSXETG00000003240
ENSXETG00000003371
ENSXETG00000003388
ENSXETG00000003389
ENSXETG00000003393
ENSXETG00000003395
ENSXETG00000003419
ENSXETG00000003468
ENSXETG00000003470
ENSXETG00000003474
ENSXETG00000003480
ENSXETG00000003517
ENSXETG00000003519
ENSXETG00000003530
ENSXETG00000003533
ENSXETG00000003537
ENSXETG00000003545
ENSXETG00000003575
ENSXETG00000003618
ENSXETG00000003729
ENSXETG00000003732
ENSXETG00000003765
ENSXETG00000003766
ENSXETG00000003836
ENSXETG00000003891
ENSXETG00000003943
ENSXETG00000003947
ENSXETG00000003954
ENSXETG00000003981
ENSXETG00000004036
ENSXETG00000004066
ENSXETG00000004125
ENSXETG00000004144
ENSXETG00000004151
ENSXETG00000004180
ENSXETG00000004188
ENSXETG00000004209
ENSXETG00000004215
ENSXETG00000004227
ENSXETG00000004247
ENSXETG00000004250
ENSXETG00000004288
ENSXETG00000004302
ENSXETG00000004316
ENSXETG00000004366
ENSXETG00000004374
ENSXETG00000004450
ENSXETG00000004455
ENSXETG00000004462
ENSXETG00000004501
ENSXETG00000004531
ENSXETG00000004580
ENSXETG00000004590
ENSXETG00000004621
ENSXETG00000004643
ENSXETG00000004673
ENSXETG00000004705
ENSXETG00000004749
ENSXETG00000004766
ENSXETG00000004773
ENSXETG00000004775
ENSXETG00000004776
ENSXETG00000004784
ENSXETG00000004839
ENSXETG00000004971
ENSXETG00000005005
ENSXETG00000005013
ENSXETG00000005049
ENSXETG00000005147
ENSXETG00000005149
ENSXETG00000005150
ENSXETG00000005195
ENSXETG00000005203
ENSXETG00000005204
ENSXETG00000005207
ENSXETG00000005211
ENSXETG00000005251
ENSXETG00000005271
ENSXETG00000005315
ENSXETG00000005319
ENSXETG00000005331
ENSXETG00000005343
ENSXETG00000005350
ENSXETG00000005431
ENSXETG00000005436
ENSXETG00000005474
ENSXETG00000005484
ENSXETG00000005524
ENSXETG00000005539
ENSXETG00000005597
ENSXETG00000005640
ENSXETG00000005647
ENSXETG00000005657
ENSXETG00000005661
ENSXETG00000005678
ENSXETG00000005714
ENSXETG00000005734
ENSXETG00000005741
ENSXETG00000005761
ENSXETG00000005789
ENSXETG00000005794
ENSXETG00000005818
ENSXETG00000005820
ENSXETG00000005840
ENSXETG00000005851
ENSXETG00000005867
ENSXETG00000005873
ENSXETG00000005932
ENSXETG00000005935
ENSXETG00000006009
ENSXETG00000006017
ENSXETG00000006020
ENSXETG00000006028
ENSXETG00000006090
ENSXETG00000006108
ENSXETG00000006150
ENSXETG00000006199
ENSXETG00000006203
ENSXETG00000006205
ENSXETG00000006214
ENSXETG00000006219
ENSXETG00000006227
ENSXETG00000006229
ENSXETG00000006265
ENSXETG00000006271
ENSXETG00000006305
ENSXETG00000006314
ENSXETG00000006324
ENSXETG00000006340
ENSXETG00000006346
ENSXETG00000006357
ENSXETG00000006386
ENSXETG00000006441
ENSXETG00000006499
ENSXETG00000006532
ENSXETG00000006543
ENSXETG00000006582
ENSXETG00000006584
ENSXETG00000006612
ENSXETG00000006616
ENSXETG00000006617
ENSXETG00000006656
ENSXETG00000006669
ENSXETG00000006675
ENSXETG00000006697
ENSXETG00000006730
ENSXETG00000006793
ENSXETG00000006829
ENSXETG00000006863
ENSXETG00000006892
ENSXETG00000006906
ENSXETG00000006916
ENSXETG00000006919
ENSXETG00000006932
ENSXETG00000007043
ENSXETG00000007076
ENSXETG00000007097
ENSXETG00000007178
ENSXETG00000007182
ENSXETG00000007221
ENSXETG00000007245
ENSXETG00000007279
ENSXETG00000007305
ENSXETG00000007353
ENSXETG00000007361
ENSXETG00000007390
ENSXETG00000007394
ENSXETG00000007397
ENSXETG00000007398
ENSXETG00000007434
ENSXETG00000007462
ENSXETG00000007480
ENSXETG00000007492
ENSXETG00000007511
ENSXETG00000007532
ENSXETG00000007533
ENSXETG00000007538
ENSXETG00000007574
ENSXETG00000007580
ENSXETG00000007584
ENSXETG00000007640
ENSXETG00000007649
ENSXETG00000007696
ENSXETG00000007709
ENSXETG00000007743
ENSXETG00000007814
ENSXETG00000007834
ENSXETG00000007852
ENSXETG00000007853
ENSXETG00000007862
ENSXETG00000007964
ENSXETG00000007976
ENSXETG00000008016
ENSXETG00000008060
ENSXETG00000008115
ENSXETG00000008124
ENSXETG00000008129
ENSXETG00000008139
ENSXETG00000008147
ENSXETG00000008158
ENSXETG00000008160
ENSXETG00000008174
ENSXETG00000008175
ENSXETG00000008185
ENSXETG00000008186
ENSXETG00000008197
ENSXETG00000008243
ENSXETG00000008383
ENSXETG00000008421
ENSXETG00000008434
ENSXETG00000008547
ENSXETG00000008622
ENSXETG00000008706
ENSXETG00000008720
ENSXETG00000008832
ENSXETG00000008840
ENSXETG00000008954
ENSXETG00000008966
ENSXETG00000008969
ENSXETG00000008972
ENSXETG00000009044
ENSXETG00000009045
ENSXETG00000009070
ENSXETG00000009119
ENSXETG00000009258
ENSXETG00000009267
ENSXETG00000009293
ENSXETG00000009373
ENSXETG00000009383
ENSXETG00000009405
ENSXETG00000009476
ENSXETG00000009511
ENSXETG00000009616
ENSXETG00000009640
ENSXETG00000009700
ENSXETG00000009718
ENSXETG00000009720
ENSXETG00000009788
ENSXETG00000009837
ENSXETG00000009863
ENSXETG00000009866
ENSXETG00000009916
ENSXETG00000009918
ENSXETG00000010013
ENSXETG00000010086
ENSXETG00000010095
ENSXETG00000010109
ENSXETG00000010173
ENSXETG00000010182
ENSXETG00000010185
ENSXETG00000010191
ENSXETG00000010257
ENSXETG00000010266
ENSXETG00000010288
ENSXETG00000010289
ENSXETG00000010305
ENSXETG00000010326
ENSXETG00000010406
ENSXETG00000010440
ENSXETG00000010462
ENSXETG00000010464
ENSXETG00000010537
ENSXETG00000010546
ENSXETG00000010624
ENSXETG00000010680
ENSXETG00000010813
ENSXETG00000010832
ENSXETG00000010839
ENSXETG00000010902
ENSXETG00000010915
ENSXETG00000010916
ENSXETG00000010939
ENSXETG00000010984
ENSXETG00000010991
ENSXETG00000011050
ENSXETG00000011189
ENSXETG00000011231
ENSXETG00000011317
ENSXETG00000011319
ENSXETG00000011385
ENSXETG00000011386
ENSXETG00000011409
ENSXETG00000011429
ENSXETG00000011430
ENSXETG00000011442
ENSXETG00000011494
ENSXETG00000011543
ENSXETG00000011562
ENSXETG00000011611
ENSXETG00000011655
ENSXETG00000011747
ENSXETG00000011781
ENSXETG00000011804
ENSXETG00000011875
ENSXETG00000011942
ENSXETG00000011988
ENSXETG00000012081
ENSXETG00000012126
ENSXETG00000012132
ENSXETG00000012149
ENSXETG00000012209
ENSXETG00000012264
ENSXETG00000012286
ENSXETG00000012298
ENSXETG00000012304
ENSXETG00000012311
ENSXETG00000012353
ENSXETG00000012418
ENSXETG00000012447
ENSXETG00000012470
ENSXETG00000012516
ENSXETG00000012522
ENSXETG00000012558
ENSXETG00000012588
ENSXETG00000012622
ENSXETG00000012629
ENSXETG00000012631
ENSXETG00000012641
ENSXETG00000012654
ENSXETG00000012718
ENSXETG00000012746
ENSXETG00000012775
ENSXETG00000012785
ENSXETG00000012840
ENSXETG00000012844
ENSXETG00000012851
ENSXETG00000012863
ENSXETG00000012870
ENSXETG00000012876
ENSXETG00000012896
ENSXETG00000012901
ENSXETG00000012902
ENSXETG00000012904
ENSXETG00000012910
ENSXETG00000012912
ENSXETG00000012923
ENSXETG00000012934
ENSXETG00000012969
ENSXETG00000012973
ENSXETG00000012975
ENSXETG00000012997
ENSXETG00000013012
ENSXETG00000013014
ENSXETG00000013018
ENSXETG00000013086
ENSXETG00000013095
ENSXETG00000013115
ENSXETG00000013118
ENSXETG00000013200
ENSXETG00000013203
ENSXETG00000013207
ENSXETG00000013268
ENSXETG00000013330
ENSXETG00000013339
ENSXETG00000013340
ENSXETG00000013348
ENSXETG00000013365
ENSXETG00000013400
ENSXETG00000013408
ENSXETG00000013424
ENSXETG00000013443
ENSXETG00000013462
ENSXETG00000013481
ENSXETG00000013534
ENSXETG00000013556
ENSXETG00000013634
ENSXETG00000013670
ENSXETG00000013673
ENSXETG00000013674
ENSXETG00000013698
ENSXETG00000013741
ENSXETG00000013772
ENSXETG00000013819
ENSXETG00000013835
ENSXETG00000013930
ENSXETG00000013954
ENSXETG00000014008
ENSXETG00000014012
ENSXETG00000014029
ENSXETG00000014032
ENSXETG00000014099
ENSXETG00000014145
ENSXETG00000014149
ENSXETG00000014152
ENSXETG00000014163
ENSXETG00000014184
ENSXETG00000014193
ENSXETG00000014244
ENSXETG00000014251
ENSXETG00000014290
ENSXETG00000014293
ENSXETG00000014328
ENSXETG00000014344
ENSXETG00000014356
ENSXETG00000014391
ENSXETG00000014394
ENSXETG00000014401
ENSXETG00000014420
ENSXETG00000014474
ENSXETG00000014477
ENSXETG00000014484
ENSXETG00000014529
ENSXETG00000014559
ENSXETG00000014594
ENSXETG00000014639
ENSXETG00000014677
ENSXETG00000014721
ENSXETG00000014753
ENSXETG00000014815
ENSXETG00000014864
ENSXETG00000014877
ENSXETG00000014881
ENSXETG00000015018
ENSXETG00000015145
ENSXETG00000015201
ENSXETG00000015267
ENSXETG00000015288
ENSXETG00000015442
ENSXETG00000015443
ENSXETG00000015589
ENSXETG00000015595
ENSXETG00000015636
ENSXETG00000015656
ENSXETG00000015671
ENSXETG00000015687
ENSXETG00000015715
ENSXETG00000015718
ENSXETG00000015727
ENSXETG00000015731
ENSXETG00000015750
ENSXETG00000015752
ENSXETG00000015769
ENSXETG00000015780
ENSXETG00000015806
ENSXETG00000015810
ENSXETG00000015817
ENSXETG00000015843
ENSXETG00000015857
ENSXETG00000015953
ENSXETG00000015984
ENSXETG00000015992
ENSXETG00000016005
ENSXETG00000016016
ENSXETG00000016020
ENSXETG00000016040
ENSXETG00000016052
ENSXETG00000016057
ENSXETG00000016079
ENSXETG00000016090
ENSXETG00000016127
ENSXETG00000016144
ENSXETG00000016162
ENSXETG00000016180
ENSXETG00000016189
ENSXETG00000016201
ENSXETG00000016222
ENSXETG00000016248
ENSXETG00000016262
ENSXETG00000016264
ENSXETG00000016288
ENSXETG00000016335
ENSXETG00000016354
ENSXETG00000016406
ENSXETG00000016467
ENSXETG00000016491
ENSXETG00000016536
ENSXETG00000016721
ENSXETG00000016732
ENSXETG00000016816
ENSXETG00000016852
ENSXETG00000016868
ENSXETG00000016884
ENSXETG00000016896
ENSXETG00000016952
ENSXETG00000016964
ENSXETG00000016972
ENSXETG00000016987
ENSXETG00000017063
ENSXETG00000017102
ENSXETG00000017114
ENSXETG00000017135
ENSXETG00000017156
ENSXETG00000017176
ENSXETG00000017194
ENSXETG00000017222
ENSXETG00000017225
ENSXETG00000017226
ENSXETG00000017309
ENSXETG00000017318
ENSXETG00000017362
ENSXETG00000017390
ENSXETG00000017395
ENSXETG00000017483
ENSXETG00000017583
ENSXETG00000017599
ENSXETG00000017642
ENSXETG00000017645
ENSXETG00000017708
ENSXETG00000017778
ENSXETG00000017823
ENSXETG00000017855
ENSXETG00000017895
ENSXETG00000017898
ENSXETG00000017926
ENSXETG00000017935
ENSXETG00000017948
ENSXETG00000017977
ENSXETG00000017985
ENSXETG00000018032
ENSXETG00000018075
ENSXETG00000018085
ENSXETG00000018110
ENSXETG00000018183
ENSXETG00000018210
ENSXETG00000018290
ENSXETG00000018359
ENSXETG00000018372
ENSXETG00000018417
ENSXETG00000018482
ENSXETG00000018565
ENSXETG00000018602
ENSXETG00000018632
ENSXETG00000018634
ENSXETG00000018665
ENSXETG00000018720
ENSXETG00000018752
ENSXETG00000018792
ENSXETG00000018811
ENSXETG00000018853
ENSXETG00000018872
ENSXETG00000018878
ENSXETG00000018917
ENSXETG00000018929
ENSXETG00000018934
ENSXETG00000018958
ENSXETG00000018965
ENSXETG00000019028
ENSXETG00000019042
ENSXETG00000019065
ENSXETG00000019108
ENSXETG00000019166
ENSXETG00000019265
ENSXETG00000019377
ENSXETG00000019380
ENSXETG00000019391
ENSXETG00000019408
ENSXETG00000019441
ENSXETG00000019501
ENSXETG00000019606
ENSXETG00000019629
ENSXETG00000019668
ENSXETG00000019694
ENSXETG00000019727
ENSXETG00000019739
ENSXETG00000019760
ENSXETG00000019849
ENSXETG00000019915
ENSXETG00000019927
ENSXETG00000019934
ENSXETG00000019940
ENSXETG00000020022
ENSXETG00000020032
ENSXETG00000020033
ENSXETG00000020075
ENSXETG00000020233
ENSXETG00000020236
ENSXETG00000020265
ENSXETG00000020299
ENSXETG00000020372
ENSXETG00000020388
ENSXETG00000020406
ENSXETG00000020473
ENSXETG00000020548
ENSXETG00000020553
ENSXETG00000020679
ENSXETG00000020695
ENSXETG00000020708
ENSXETG00000020722
ENSXETG00000020868
ENSXETG00000020892
ENSXETG00000020947
ENSXETG00000020971
ENSXETG00000020975
ENSXETG00000021081
ENSXETG00000021098
ENSXETG00000021118
ENSXETG00000021123
ENSXETG00000021148
ENSXETG00000021149
ENSXETG00000021253
ENSXETG00000021277
ENSXETG00000021337
ENSXETG00000021382
ENSXETG00000021445
ENSXETG00000021450
ENSXETG00000021460
ENSXETG00000021480
ENSXETG00000021492
ENSXETG00000021533
ENSXETG00000021542
ENSXETG00000021550
ENSXETG00000021559
ENSXETG00000021591
ENSXETG00000021595
ENSXETG00000021603
ENSXETG00000021612
ENSXETG00000021615
ENSXETG00000021630
ENSXETG00000021653
ENSXETG00000021670
ENSXETG00000021674
ENSXETG00000021832
ENSXETG00000021861
ENSXETG00000021938
ENSXETG00000021967
ENSXETG00000021978
ENSXETG00000021987
ENSXETG00000021992
ENSXETG00000022078
ENSXETG00000022080
ENSXETG00000022118
ENSXETG00000022133
ENSXETG00000022281
ENSXETG00000022315
ENSXETG00000022337
ENSXETG00000022355
ENSXETG00000022358
ENSXETG00000022361
ENSXETG00000022368
ENSXETG00000022447
ENSXETG00000022448
ENSXETG00000022451
ENSXETG00000022452
ENSXETG00000022465
ENSXETG00000022466
ENSXETG00000022525
ENSXETG00000022572
ENSXETG00000022629
ENSXETG00000022643
ENSXETG00000022690
ENSXETG00000022730
ENSXETG00000022748
ENSXETG00000022784
ENSXETG00000022804
ENSXETG00000022923
ENSXETG00000022951
ENSXETG00000022954
ENSXETG00000022980
ENSXETG00000022997
ENSXETG00000023001
ENSXETG00000023036
ENSXETG00000023084
ENSXETG00000023090
ENSXETG00000023113
ENSXETG00000023141
ENSXETG00000023176
ENSXETG00000023198
ENSXETG00000023224
ENSXETG00000023250
ENSXETG00000023329
ENSXETG00000023399
ENSXETG00000023471
ENSXETG00000023472
ENSXETG00000023475
ENSXETG00000023476
ENSXETG00000023479
ENSXETG00000023484
ENSXETG00000023538
ENSXETG00000023554
ENSXETG00000023563
ENSXETG00000023595
ENSXETG00000023615
ENSXETG00000023647
ENSXETG00000023648
ENSXETG00000023676
ENSXETG00000023691
ENSXETG00000023717
ENSXETG00000023742
ENSXETG00000023804
ENSXETG00000023811
ENSXETG00000023887
ENSXETG00000023888
ENSXETG00000023908
ENSXETG00000023935
ENSXETG00000024063
ENSXETG00000024087
ENSXETG00000024098
ENSXETG00000024100
ENSXETG00000024103
ENSXETG00000024108
ENSXETG00000024112
ENSXETG00000024117
ENSXETG00000024124
ENSXETG00000024129
ENSXETG00000024145
ENSXETG00000024199
ENSXETG00000024224
ENSXETG00000024288
ENSXETG00000024395
ENSXETG00000024441
ENSXETG00000024478
ENSXETG00000024534
ENSXETG00000024543
ENSXETG00000024610
ENSXETG00000024642
ENSXETG00000024648
ENSXETG00000024695
ENSXETG00000024752
ENSXETG00000024834
ENSXETG00000024875
ENSXETG00000024911
ENSXETG00000024943
ENSXETG00000024949
ENSXETG00000024952
ENSXETG00000025124
ENSXETG00000025131
ENSXETG00000025157
ENSXETG00000025183
ENSXETG00000025184
ENSXETG00000025363
ENSXETG00000025400
ENSXETG00000025441
ENSXETG00000025479
ENSXETG00000025480
ENSXETG00000025493
ENSXETG00000025593
ENSXETG00000025623
ENSXETG00000025649
ENSXETG00000025697
ENSXETG00000025709
ENSXETG00000025730
ENSXETG00000025742
ENSXETG00000025807
ENSXETG00000025941
ENSXETG00000025999
ENSXETG00000026007
ENSXETG00000026026
ENSXETG00000026124
ENSXETG00000026157
ENSXETG00000026163
ENSXETG00000026177
ENSXETG00000026233
ENSXETG00000026269
ENSXETG00000026292
ENSXETG00000026308
ENSXETG00000026404
ENSXETG00000026450
ENSXETG00000026639
ENSXETG00000026642
ENSXETG00000026722
ENSXETG00000026797
ENSXETG00000026847
ENSXETG00000026867
ENSXETG00000026893
ENSXETG00000026921
ENSXETG00000026940
ENSXETG00000027066
ENSXETG00000027261
ENSXETG00000027272
ENSXETG00000027302
ENSXETG00000027351
ENSXETG00000027356
ENSXETG00000027392
ENSXETG00000027405
ENSXETG00000027476
ENSXETG00000027510
ENSXETG00000027567
ENSXETG00000027581
ENSXETG00000027605
ENSXETG00000027655
ENSXETG00000027722
ENSXETG00000027759
ENSXETG00000027815
ENSXETG00000027832
ENSXETG00000027834
ENSXETG00000029918
ENSXETG00000030021
ENSXETG00000030057
ENSXETG00000030084
ENSXETG00000030207
ENSXETG00000030212
ENSXETG00000030217
ENSXETG00000030222
ENSXETG00000030247
ENSXETG00000030368
ENSXETG00000030465
ENSXETG00000030469
ENSXETG00000030506
ENSXETG00000030514
ENSXETG00000030591
ENSXETG00000030595
ENSXETG00000030602
ENSXETG00000030693
ENSXETG00000030726
ENSXETG00000030776
ENSXETG00000030790
ENSXETG00000030822
ENSXETG00000030849
ENSXETG00000030886
ENSXETG00000030888
ENSXETG00000030953
ENSXETG00000031041
ENSXETG00000031066
ENSXETG00000031122
ENSXETG00000031189
ENSXETG00000031281
ENSXETG00000031332
ENSXETG00000031337
ENSXETG00000031380
ENSXETG00000031416
ENSXETG00000031431
ENSXETG00000031488
ENSXETG00000031503
ENSXETG00000031506
ENSXETG00000031542
ENSXETG00000031567
ENSXETG00000031568
ENSXETG00000031617
ENSXETG00000031660
ENSXETG00000031662
ENSXETG00000031677
ENSXETG00000031689
ENSXETG00000031731
ENSXETG00000031947
ENSXETG00000031961
ENSXETG00000032039
ENSXETG00000032076
ENSXETG00000032118
ENSXETG00000032129
ENSXETG00000032150
ENSXETG00000032164
ENSXETG00000032195
ENSXETG00000032204
ENSXETG00000032205
ENSXETG00000032403
ENSXETG00000032678
ENSXETG00000032726
ENSXETG00000032778
ENSXETG00000032850
ENSXETG00000032872
ENSXETG00000032881
ENSXETG00000032956
ENSXETG00000033046
ENSXETG00000033110
ENSXETG00000033121
ENSXETG00000033122
ENSXETG00000033130
ENSXETG00000033242
ENSXETG00000033244
ENSXETG00000033282
ENSXETG00000033283
ENSXETG00000033317
ENSXETG00000033345
ENSXETG00000033356
ENSXETG00000033383
ENSXETG00000033401
ENSXETG00000033427
ENSXETG00000033466
ENSXETG00000033541
ENSXETG00000033563
ENSXETG00000033585
ENSXETG00000033652
ENSXETG00000033655
ENSXETG00000033716
ENSXETG00000033874
ENSXETG00000033877
ENSXETG00000033882
ENSXETG00000033887
ENSXETG00000033917
ENSXETG00000033983
ENSXETG00000034012
ENSXETG00000034121
ENSXETG00000034143
ENSXETG00000034215
ENSXETG00000034216
ENSXETG00000034247
ENSXETG00000034249
ENSXETG00000034252

## Sheet: Danio rerio
ENSDARG00000000369
ENSDARG00000000540
ENSDARG00000000729
ENSDARG00000000747
ENSDARG00000001244
ENSDARG00000001578
ENSDARG00000001950
ENSDARG00000001969
ENSDARG00000002213
ENSDARG00000002479
ENSDARG00000002571
ENSDARG00000002591
ENSDARG00000002659
ENSDARG00000002670
ENSDARG00000002701
ENSDARG00000003132
ENSDARG00000003270
ENSDARG00000003307
ENSDARG00000003513
ENSDARG00000003697
ENSDARG00000003984
ENSDARG00000004034
ENSDARG00000004060
ENSDARG00000004251
ENSDARG00000004296
ENSDARG00000004308
ENSDARG00000004363
ENSDARG00000004436
ENSDARG00000004532
ENSDARG00000004735
ENSDARG00000004823
ENSDARG00000005112
ENSDARG00000005541
ENSDARG00000005576
ENSDARG00000005619
ENSDARG00000005640
ENSDARG00000005704
ENSDARG00000005774
ENSDARG00000005789
ENSDARG00000005908
ENSDARG00000005916
ENSDARG00000006005
ENSDARG00000006467
ENSDARG00000006609
ENSDARG00000006760
ENSDARG00000006811
ENSDARG00000006924
ENSDARG00000007264
ENSDARG00000007294
ENSDARG00000007523
ENSDARG00000007711
ENSDARG00000007774
ENSDARG00000007918
ENSDARG00000008032
ENSDARG00000008097
ENSDARG00000008188
ENSDARG00000008200
ENSDARG00000008235
ENSDARG00000008239
ENSDARG00000008765
ENSDARG00000008829
ENSDARG00000008884
ENSDARG00000009021
ENSDARG00000009074
ENSDARG00000009153
ENSDARG00000009170
ENSDARG00000009194
ENSDARG00000009311
ENSDARG00000009341
ENSDARG00000009436
ENSDARG00000009607
ENSDARG00000009748
ENSDARG00000009783
ENSDARG00000009933
ENSDARG00000010137
ENSDARG00000010267
ENSDARG00000010318
ENSDARG00000010400
ENSDARG00000010481
ENSDARG00000010640
ENSDARG00000010771
ENSDARG00000010823
ENSDARG00000010978
ENSDARG00000011170
ENSDARG00000011186
ENSDARG00000011262
ENSDARG00000011317
ENSDARG00000011400
ENSDARG00000011418
ENSDARG00000011555
ENSDARG00000011564
ENSDARG00000011613
ENSDARG00000011648
ENSDARG00000011724
ENSDARG00000011740
ENSDARG00000011743
ENSDARG00000011925
ENSDARG00000011958
ENSDARG00000011998
ENSDARG00000012016
ENSDARG00000012066
ENSDARG00000012222
ENSDARG00000012248
ENSDARG00000012368
ENSDARG00000012405
ENSDARG00000012506
ENSDARG00000012563
ENSDARG00000012627
ENSDARG00000012682
ENSDARG00000013042
ENSDARG00000013058
ENSDARG00000013082
ENSDARG00000013207
ENSDARG00000013397
ENSDARG00000013461
ENSDARG00000013522
ENSDARG00000013655
ENSDARG00000013729
ENSDARG00000013782
ENSDARG00000013830
ENSDARG00000013863
ENSDARG00000013881
ENSDARG00000013930
ENSDARG00000014050
ENSDARG00000014179
ENSDARG00000014248
ENSDARG00000014366
ENSDARG00000014522
ENSDARG00000014571
ENSDARG00000014634
ENSDARG00000014727
ENSDARG00000014943
ENSDARG00000015538
ENSDARG00000015554
ENSDARG00000015681
ENSDARG00000015831
ENSDARG00000015891
ENSDARG00000015947
ENSDARG00000016181
ENSDARG00000016319
ENSDARG00000016345
ENSDARG00000016594
ENSDARG00000016636
ENSDARG00000016656
ENSDARG00000016717
ENSDARG00000016724
ENSDARG00000016744
ENSDARG00000016866
ENSDARG00000017155
ENSDARG00000017165
ENSDARG00000017211
ENSDARG00000017261
ENSDARG00000017389
ENSDARG00000017444
ENSDARG00000017762
ENSDARG00000017794
ENSDARG00000017843
ENSDARG00000018118
ENSDARG00000018181
ENSDARG00000018303
ENSDARG00000018432
ENSDARG00000018542
ENSDARG00000018574
ENSDARG00000018637
ENSDARG00000018809
ENSDARG00000018890
ENSDARG00000018907
ENSDARG00000018944
ENSDARG00000018976
ENSDARG00000019326
ENSDARG00000019353
ENSDARG00000019364
ENSDARG00000019950
ENSDARG00000020007
ENSDARG00000020084
ENSDARG00000020115
ENSDARG00000020192
ENSDARG00000020201
ENSDARG00000020232
ENSDARG00000020239
ENSDARG00000020250
ENSDARG00000020607
ENSDARG00000020608
ENSDARG00000020625
ENSDARG00000020730
ENSDARG00000020822
ENSDARG00000020841
ENSDARG00000020876
ENSDARG00000020890
ENSDARG00000020952
ENSDARG00000020953
ENSDARG00000020979
ENSDARG00000020986
ENSDARG00000021032
ENSDARG00000021048
ENSDARG00000021120
ENSDARG00000021147
ENSDARG00000021208
ENSDARG00000021582
ENSDARG00000021794
ENSDARG00000021827
ENSDARG00000021889
ENSDARG00000021945
ENSDARG00000021974
ENSDARG00000021975
ENSDARG00000021985
ENSDARG00000022424
ENSDARG00000023145
ENSDARG00000023190
ENSDARG00000023678
ENSDARG00000023713
ENSDARG00000023861
ENSDARG00000024032
ENSDARG00000024047
ENSDARG00000024090
ENSDARG00000024092
ENSDARG00000024311
ENSDARG00000024651
ENSDARG00000024964
ENSDARG00000025032
ENSDARG00000025301
ENSDARG00000025612
ENSDARG00000025615
ENSDARG00000025679
ENSDARG00000025820
ENSDARG00000026053
ENSDARG00000026149
ENSDARG00000026180
ENSDARG00000026294
ENSDARG00000026400
ENSDARG00000026548
ENSDARG00000026561
ENSDARG00000026577
ENSDARG00000026767
ENSDARG00000026787
ENSDARG00000026985
ENSDARG00000027182
ENSDARG00000027584
ENSDARG00000027867
ENSDARG00000027984
ENSDARG00000028345
ENSDARG00000028435
ENSDARG00000028475
ENSDARG00000028824
ENSDARG00000028971
ENSDARG00000029057
ENSDARG00000029071
ENSDARG00000029248
ENSDARG00000029351
ENSDARG00000029388
ENSDARG00000029394
ENSDARG00000029695
ENSDARG00000029729
ENSDARG00000029911
ENSDARG00000029952
ENSDARG00000030094
ENSDARG00000030110
ENSDARG00000030133
ENSDARG00000030157
ENSDARG00000030166
ENSDARG00000030236
ENSDARG00000030251
ENSDARG00000030417
ENSDARG00000030463
ENSDARG00000030548
ENSDARG00000030573
ENSDARG00000030665
ENSDARG00000030830
ENSDARG00000030896
ENSDARG00000031483
ENSDARG00000031683
ENSDARG00000032098
ENSDARG00000032380
ENSDARG00000032603
ENSDARG00000032919
ENSDARG00000033370
ENSDARG00000033852
ENSDARG00000034042
ENSDARG00000034060
ENSDARG00000034293
ENSDARG00000034375
ENSDARG00000034473
ENSDARG00000034528
ENSDARG00000034541
ENSDARG00000034616
ENSDARG00000034956
ENSDARG00000035074
ENSDARG00000035146
ENSDARG00000035158
ENSDARG00000035324
ENSDARG00000035389
ENSDARG00000035398
ENSDARG00000035434
ENSDARG00000035437
ENSDARG00000035505
ENSDARG00000036056
ENSDARG00000036155
ENSDARG00000036179
ENSDARG00000036293
ENSDARG00000036456
ENSDARG00000036463
ENSDARG00000036549
ENSDARG00000036592
ENSDARG00000036675
ENSDARG00000036678
ENSDARG00000036754
ENSDARG00000036755
ENSDARG00000036776
ENSDARG00000037059
ENSDARG00000037079
ENSDARG00000037109
ENSDARG00000037116
ENSDARG00000037144
ENSDARG00000037158
ENSDARG00000037177
ENSDARG00000037285
ENSDARG00000037835
ENSDARG00000037897
ENSDARG00000037910
ENSDARG00000037960
ENSDARG00000037995
ENSDARG00000038185
ENSDARG00000038186
ENSDARG00000038258
ENSDARG00000038423
ENSDARG00000038566
ENSDARG00000038567
ENSDARG00000038643
ENSDARG00000038784
ENSDARG00000038826
ENSDARG00000039051
ENSDARG00000039052
ENSDARG00000039185
ENSDARG00000039319
ENSDARG00000039363
ENSDARG00000039399
ENSDARG00000039516
ENSDARG00000039517
ENSDARG00000039675
ENSDARG00000039743
ENSDARG00000039770
ENSDARG00000039931
ENSDARG00000039989
ENSDARG00000040039
ENSDARG00000040070
ENSDARG00000040334
ENSDARG00000040346
ENSDARG00000040548
ENSDARG00000040623
ENSDARG00000040657
ENSDARG00000040803
ENSDARG00000040948
ENSDARG00000041060
ENSDARG00000041217
ENSDARG00000041428
ENSDARG00000041665
ENSDARG00000041706
ENSDARG00000041747
ENSDARG00000041791
ENSDARG00000041870
ENSDARG00000041887
ENSDARG00000041921
ENSDARG00000042080
ENSDARG00000042344
ENSDARG00000042428
ENSDARG00000042448
ENSDARG00000042527
ENSDARG00000042571
ENSDARG00000042714
ENSDARG00000042716
ENSDARG00000042727
ENSDARG00000042823
ENSDARG00000042876
ENSDARG00000042984
ENSDARG00000043246
ENSDARG00000043283
ENSDARG00000043287
ENSDARG00000043360
ENSDARG00000043388
ENSDARG00000043548
ENSDARG00000043624
ENSDARG00000043720
ENSDARG00000043854
ENSDARG00000043884
ENSDARG00000044155
ENSDARG00000044484
ENSDARG00000044491
ENSDARG00000044566
ENSDARG00000044596
ENSDARG00000044625
ENSDARG00000044634
ENSDARG00000044669
ENSDARG00000044895
ENSDARG00000044949
ENSDARG00000045017
ENSDARG00000045129
ENSDARG00000045306
ENSDARG00000045398
ENSDARG00000045402
ENSDARG00000045416
ENSDARG00000045438
ENSDARG00000045562
ENSDARG00000045864
ENSDARG00000045873
ENSDARG00000045893
ENSDARG00000045951
ENSDARG00000045958
ENSDARG00000051785
ENSDARG00000051876
ENSDARG00000051916
ENSDARG00000051923
ENSDARG00000051931
ENSDARG00000052114
ENSDARG00000052247
ENSDARG00000052322
ENSDARG00000052348
ENSDARG00000052567
ENSDARG00000052907
ENSDARG00000053186
ENSDARG00000053219
ENSDARG00000053227
ENSDARG00000053254
ENSDARG00000053262
ENSDARG00000053344
ENSDARG00000053481
ENSDARG00000053485
ENSDARG00000053493
ENSDARG00000053505
ENSDARG00000053666
ENSDARG00000053946
ENSDARG00000054096
ENSDARG00000054213
ENSDARG00000054446
ENSDARG00000054570
ENSDARG00000054588
ENSDARG00000054666
ENSDARG00000054688
ENSDARG00000054978
ENSDARG00000055185
ENSDARG00000055190
ENSDARG00000055240
ENSDARG00000055445
ENSDARG00000055470
ENSDARG00000055591
ENSDARG00000055613
ENSDARG00000055705
ENSDARG00000055901
ENSDARG00000055912
ENSDARG00000056134
ENSDARG00000056209
ENSDARG00000056387
ENSDARG00000056447
ENSDARG00000056559
ENSDARG00000056590
ENSDARG00000056640
ENSDARG00000056722
ENSDARG00000056726
ENSDARG00000056855
ENSDARG00000056871
ENSDARG00000056932
ENSDARG00000056938
ENSDARG00000056957
ENSDARG00000057147
ENSDARG00000057210
ENSDARG00000057234
ENSDARG00000057681
ENSDARG00000058108
ENSDARG00000058260
ENSDARG00000058292
ENSDARG00000058352
ENSDARG00000058356
ENSDARG00000058448
ENSDARG00000058471
ENSDARG00000058571
ENSDARG00000058597
ENSDARG00000058710
ENSDARG00000058760
ENSDARG00000059048
ENSDARG00000059093
ENSDARG00000059303
ENSDARG00000059308
ENSDARG00000059360
ENSDARG00000059367
ENSDARG00000059498
ENSDARG00000059631
ENSDARG00000059856
ENSDARG00000059858
ENSDARG00000059923
ENSDARG00000060005
ENSDARG00000060041
ENSDARG00000060120
ENSDARG00000060265
ENSDARG00000060288
ENSDARG00000060298
ENSDARG00000060316
ENSDARG00000060318
ENSDARG00000060362
ENSDARG00000060580
ENSDARG00000060594
ENSDARG00000060641
ENSDARG00000060847
ENSDARG00000060917
ENSDARG00000060946
ENSDARG00000060948
ENSDARG00000061052
ENSDARG00000061070
ENSDARG00000061124
ENSDARG00000061162
ENSDARG00000061165
ENSDARG00000061204
ENSDARG00000061219
ENSDARG00000061249
ENSDARG00000061255
ENSDARG00000061288
ENSDARG00000061379
ENSDARG00000061417
ENSDARG00000061450
ENSDARG00000061621
ENSDARG00000061747
ENSDARG00000061774
ENSDARG00000061796
ENSDARG00000061901
ENSDARG00000061960
ENSDARG00000062077
ENSDARG00000062237
ENSDARG00000062350
ENSDARG00000062579
ENSDARG00000062634
ENSDARG00000062662
ENSDARG00000062699
ENSDARG00000062711
ENSDARG00000062987
ENSDARG00000062997
ENSDARG00000063031
ENSDARG00000063078
ENSDARG00000063244
ENSDARG00000063341
ENSDARG00000063371
ENSDARG00000063457
ENSDARG00000063563
ENSDARG00000063569
ENSDARG00000063621
ENSDARG00000063627
ENSDARG00000063636
ENSDARG00000063661
ENSDARG00000063718
ENSDARG00000067591
ENSDARG00000067639
ENSDARG00000067711
ENSDARG00000067752
ENSDARG00000067829
ENSDARG00000067848
ENSDARG00000067947
ENSDARG00000067982
ENSDARG00000068082
ENSDARG00000068125
ENSDARG00000068319
ENSDARG00000068457
ENSDARG00000068586
ENSDARG00000068640
ENSDARG00000068680
ENSDARG00000068691
ENSDARG00000068726
ENSDARG00000068889
ENSDARG00000069009
ENSDARG00000069065
ENSDARG00000069092
ENSDARG00000069356
ENSDARG00000069397
ENSDARG00000069419
ENSDARG00000069423
ENSDARG00000069476
ENSDARG00000069485
ENSDARG00000069494
ENSDARG00000069525
ENSDARG00000069590
ENSDARG00000069601
ENSDARG00000069671
ENSDARG00000069855
ENSDARG00000070038
ENSDARG00000070047
ENSDARG00000070151
ENSDARG00000070214
ENSDARG00000070239
ENSDARG00000070261
ENSDARG00000070278
ENSDARG00000070387
ENSDARG00000070545
ENSDARG00000070597
ENSDARG00000070623
ENSDARG00000070656
ENSDARG00000070658
ENSDARG00000070686
ENSDARG00000070702
ENSDARG00000070721
ENSDARG00000070730
ENSDARG00000070810
ENSDARG00000070835
ENSDARG00000070971
ENSDARG00000071051
ENSDARG00000071060
ENSDARG00000071378
ENSDARG00000071418
ENSDARG00000071469
ENSDARG00000071491
ENSDARG00000071549
ENSDARG00000071579
ENSDARG00000071592
ENSDARG00000071694
ENSDARG00000071868
ENSDARG00000071876
ENSDARG00000071877
ENSDARG00000073773
ENSDARG00000073881
ENSDARG00000073914
ENSDARG00000073928
ENSDARG00000073988
ENSDARG00000073997
ENSDARG00000074168
ENSDARG00000074229
ENSDARG00000074309
ENSDARG00000074316
ENSDARG00000074378
ENSDARG00000074447
ENSDARG00000074507
ENSDARG00000074726
ENSDARG00000074786
ENSDARG00000074852
ENSDARG00000074891
ENSDARG00000074923
ENSDARG00000074927
ENSDARG00000075159
ENSDARG00000075217
ENSDARG00000075249
ENSDARG00000075326
ENSDARG00000075333
ENSDARG00000075526
ENSDARG00000075682
ENSDARG00000075754
ENSDARG00000075819
ENSDARG00000075906
ENSDARG00000075993
ENSDARG00000076002
ENSDARG00000076045
ENSDARG00000076060
ENSDARG00000076312
ENSDARG00000076393
ENSDARG00000076439
ENSDARG00000076464
ENSDARG00000076565
ENSDARG00000076566
ENSDARG00000076618
ENSDARG00000076735
ENSDARG00000076821
ENSDARG00000076874
ENSDARG00000076968
ENSDARG00000077054
ENSDARG00000077222
ENSDARG00000077253
ENSDARG00000077323
ENSDARG00000077375
ENSDARG00000077424
ENSDARG00000077583
ENSDARG00000077590
ENSDARG00000077607
ENSDARG00000077815
ENSDARG00000077860
ENSDARG00000077909
ENSDARG00000078044
ENSDARG00000078094
ENSDARG00000078261
ENSDARG00000078373
ENSDARG00000078546
ENSDARG00000078561
ENSDARG00000078576
ENSDARG00000078593
ENSDARG00000078654
ENSDARG00000078680
ENSDARG00000078707
ENSDARG00000079166
ENSDARG00000079470
ENSDARG00000079492
ENSDARG00000079631
ENSDARG00000079680
ENSDARG00000079688
ENSDARG00000079751
ENSDARG00000079795
ENSDARG00000079872
ENSDARG00000079886
ENSDARG00000079933
ENSDARG00000079947
ENSDARG00000086112
ENSDARG00000086269
ENSDARG00000087196
ENSDARG00000087640
ENSDARG00000087895
ENSDARG00000087950
ENSDARG00000088087
ENSDARG00000088119
ENSDARG00000088246
ENSDARG00000088454
ENSDARG00000088581
ENSDARG00000088763
ENSDARG00000088959
ENSDARG00000088981
ENSDARG00000089302
ENSDARG00000089546
ENSDARG00000089637
ENSDARG00000089644
ENSDARG00000089787
ENSDARG00000089847
ENSDARG00000089885
ENSDARG00000089920
ENSDARG00000090096
ENSDARG00000090387
ENSDARG00000090396
ENSDARG00000090481
ENSDARG00000090581
ENSDARG00000090616
ENSDARG00000090830
ENSDARG00000090980
ENSDARG00000091163
ENSDARG00000091198
ENSDARG00000091481
ENSDARG00000091511
ENSDARG00000091512
ENSDARG00000091658
ENSDARG00000092112
ENSDARG00000094557
ENSDARG00000094623
ENSDARG00000094646
ENSDARG00000094992
ENSDARG00000095086
ENSDARG00000095904
ENSDARG00000095963
ENSDARG00000096045
ENSDARG00000096454
ENSDARG00000096668

## Sheet: Branchiostoma floridae
bf-105101
bf-107099
bf-111943
bf-113828
bf-114402
bf-114431
bf-114879
bf-114929
bf-115076
bf-115405
bf-115435
bf-115457
bf-116065
bf-116178
bf-116232
bf-117049
bf-117239
bf-117746
bf-118348
bf-118464
bf-118793
bf-118952
bf-118994
bf-119144
bf-119373
bf-119718
bf-120481
bf-121166
bf-121259
bf-121645
bf-122058
bf-122212
bf-123382
bf-123634
bf-123714
bf-123925
bf-124303
bf-124326
bf-124403
bf-125026
bf-125077
bf-125246
bf-125501
bf-125713
bf-126051
bf-126137
bf-126222
bf-126410
bf-126417
bf-126497
bf-126888
bf-126926
bf-127904
bf-128755
bf-128813
bf-128941
bf-131307
bf-133849
bf-135629
bf-145199
bf-154102
bf-173527
bf-181634
bf-181965
bf-194026
bf-198761
bf-199003
bf-199850
bf-202549
bf-203026
bf-203150
bf-203567
bf-203813
bf-204360
bf-205562
bf-207091
bf-208943
bf-209019
bf-209123
bf-211768
bf-212228
bf-214382
bf-214882
bf-215239
bf-215251
bf-215272
bf-216227
bf-216236
bf-216420
bf-217012
bf-220688
bf-223927
bf-224986
bf-232983
bf-234140
bf-235564
bf-235977
bf-236516
bf-245792
bf-247570
bf-247699
bf-247762
bf-249506
bf-250332
bf-255350
bf-260217
bf-260843
bf-264353
bf-264576
bf-264754
bf-265006
bf-269081
bf-269554
bf-269996
bf-271338
bf-273506
bf-275357
bf-275838
bf-276314
bf-276868
bf-277479
bf-277895
bf-279133
bf-279857
bf-280395
bf-281557
bf-282854
bf-285261
bf-286839
bf-287194
bf-57556
bf-58691
bf-59014
bf-59837
bf-60376
bf-60404
bf-61248
bf-62482
bf-63786
bf-63956
bf-63957
bf-64000
bf-64100
bf-64327
bf-64337
bf-64593
bf-65090
bf-65483
bf-66127
bf-67169
bf-67658
bf-67749
bf-68288
bf-68503
bf-70176
bf-70434
bf-70490
bf-70494
bf-71032
bf-73296
bf-74076
bf-74383
bf-76524
bf-76728
bf-77420
bf-79122
bf-79853
bf-81341
bf-81741
bf-83769
bf-84067
bf-84493
bf-84526
bf-84669
bf-84831
bf-84838
bf-84959
bf-85076
bf-85426
bf-85605
bf-85695
bf-85817
bf-85925
bf-86844
bf-89089
bf-89455
bf-89654
bf-89760
bf-89984
bf-90716
bf-90748
bf-90929
bf-91063
bf-91518
bf-91636
bf-92201
bf-92208
bf-92366
bf-93050
bf-96304
bf-97448
bf-98875

## Sheet: Ciona intestinalis
ENSCING00000000079
ENSCING00000000219
ENSCING00000000231
ENSCING00000000337
ENSCING00000000348
ENSCING00000000618
ENSCING00000000654
ENSCING00000000950
ENSCING00000001083
ENSCING00000001342
ENSCING00000001372
ENSCING00000001453
ENSCING00000001528
ENSCING00000001688
ENSCING00000001872
ENSCING00000001896
ENSCING00000001918
ENSCING00000002042
ENSCING00000002154
ENSCING00000002162
ENSCING00000002170
ENSCING00000002179
ENSCING00000002409
ENSCING00000002580
ENSCING00000002649
ENSCING00000002781
ENSCING00000002813
ENSCING00000002848
ENSCING00000003086
ENSCING00000003158
ENSCING00000003191
ENSCING00000003219
ENSCING00000003235
ENSCING00000003241
ENSCING00000003432
ENSCING00000003436
ENSCING00000003448
ENSCING00000003548
ENSCING00000003572
ENSCING00000003658
ENSCING00000003660
ENSCING00000003763
ENSCING00000003782
ENSCING00000003912
ENSCING00000004050
ENSCING00000004069
ENSCING00000004115
ENSCING00000004136
ENSCING00000004205
ENSCING00000004212
ENSCING00000004226
ENSCING00000004299
ENSCING00000004300
ENSCING00000004329
ENSCING00000004501
ENSCING00000004508
ENSCING00000004582
ENSCING00000004591
ENSCING00000004635
ENSCING00000004639
ENSCING00000004783
ENSCING00000004825
ENSCING00000004905
ENSCING00000004996
ENSCING00000005020
ENSCING00000005024
ENSCING00000005042
ENSCING00000005043
ENSCING00000005247
ENSCING00000005284
ENSCING00000005291
ENSCING00000005360
ENSCING00000005361
ENSCING00000005502
ENSCING00000005582
ENSCING00000005595
ENSCING00000005608
ENSCING00000005634
ENSCING00000005638
ENSCING00000005659
ENSCING00000005716
ENSCING00000005927
ENSCING00000005956
ENSCING00000005985
ENSCING00000006005
ENSCING00000006065
ENSCING00000006179
ENSCING00000006195
ENSCING00000006270
ENSCING00000006286
ENSCING00000006308
ENSCING00000006436
ENSCING00000006467
ENSCING00000006615
ENSCING00000006667
ENSCING00000006719
ENSCING00000006721
ENSCING00000006815
ENSCING00000006912
ENSCING00000007109
ENSCING00000007220
ENSCING00000007329
ENSCING00000007375
ENSCING00000007420
ENSCING00000007432
ENSCING00000007478
ENSCING00000007645
ENSCING00000007712
ENSCING00000007729
ENSCING00000007910
ENSCING00000007913
ENSCING00000007942
ENSCING00000007967
ENSCING00000008006
ENSCING00000008017
ENSCING00000008098
ENSCING00000008164
ENSCING00000008347
ENSCING00000008401
ENSCING00000008574
ENSCING00000008579
ENSCING00000008614
ENSCING00000008620
ENSCING00000008630
ENSCING00000008647
ENSCING00000008657
ENSCING00000008671
ENSCING00000008706
ENSCING00000008749
ENSCING00000008811
ENSCING00000008906
ENSCING00000008912
ENSCING00000008938
ENSCING00000008979
ENSCING00000009152
ENSCING00000009198
ENSCING00000009298
ENSCING00000009302
ENSCING00000009415
ENSCING00000009423
ENSCING00000009485
ENSCING00000009532
ENSCING00000009562
ENSCING00000009583
ENSCING00000009590
ENSCING00000009621
ENSCING00000009649
ENSCING00000009655
ENSCING00000009663
ENSCING00000009878
ENSCING00000010079
ENSCING00000011306
ENSCING00000011417
ENSCING00000011567
ENSCING00000011599
ENSCING00000011658
ENSCING00000011762
ENSCING00000011871
ENSCING00000012236
ENSCING00000012455
ENSCING00000012473
ENSCING00000012548
ENSCING00000012575
ENSCING00000012641
ENSCING00000012657
ENSCING00000012709
ENSCING00000012734
ENSCING00000012945
ENSCING00000012953
ENSCING00000012994
ENSCING00000013443
ENSCING00000013549
ENSCING00000013600
ENSCING00000013683
ENSCING00000013778
ENSCING00000014087
ENSCING00000014092
ENSCING00000014278
ENSCING00000014322
ENSCING00000014447
ENSCING00000014557
ENSCING00000014916
ENSCING00000014932
ENSCING00000014981
ENSCING00000015038
ENSCING00000015285
ENSCING00000015563
ENSCING00000016670
ENSCING00000016942
ENSCING00000017107
ENSCING00000017193
ENSCING00000017363
ENSCING00000017967
ENSCING00000017984
ENSCING00000018276
ENSCING00000018434
ENSCING00000018681
ENSCING00000018831
ENSCING00000019148
ENSCING00000019315
ENSCING00000019447
ENSCING00000019565
ENSCING00000019572
ENSCING00000019580
ENSCING00000019714
ENSCING00000019722
ENSCING00000019738
ENSCING00000019849
ENSCING00000020062
ENSCING00000020096
ENSCING00000020123
ENSCING00000020226
ENSCING00000020383
ENSCING00000020417
ENSCING00000020442
ENSCING00000020446
ENSCING00000020625
ENSCING00000020740
ENSCING00000020776
ENSCING00000020931
ENSCING00000020969
ENSCING00000021005
ENSCING00000021117
ENSCING00000021125
ENSCING00000021131
ENSCING00000021138
ENSCING00000021546
ENSCING00000021617
ENSCING00000021621
ENSCING00000021685
ENSCING00000021761
ENSCING00000022168
ENSCING00000022335
ENSCING00000022589
ENSCING00000022668
ENSCING00000022681
ENSCING00000022788
ENSCING00000022911
ENSCING00000022974
ENSCING00000023015
ENSCING00000023034
ENSCING00000023042
ENSCING00000023134
ENSCING00000023187
ENSCING00000023259
ENSCING00000023267
ENSCING00000023447
ENSCING00000023496
ENSCING00000023652
ENSCING00000023781
ENSCING00000023983
ENSCING00000024164
ENSCING00000024328
ENSCING00000024768
ENSCING00000024877
ENSCING00000024903
ENSCING00000025034
ENSCING00000025062
ENSCING00000025107
ENSCING00000025115

## Sheet: Crassostrea gigas
CGI_10000307
CGI_10000867
CGI_10001022
CGI_10001253
CGI_10001334
CGI_10001347
CGI_10001643
CGI_10001654
CGI_10001852
CGI_10001975
CGI_10002374
CGI_10002435
CGI_10002806
CGI_10002981
CGI_10003268
CGI_10003298
CGI_10003308
CGI_10003331
CGI_10003369
CGI_10003695
CGI_10003721
CGI_10003949
CGI_10003999
CGI_10004289
CGI_10004296
CGI_10004299
CGI_10004307
CGI_10004329
CGI_10004374
CGI_10004478
CGI_10004962
CGI_10004963
CGI_10005088
CGI_10005145
CGI_10005375
CGI_10005388
CGI_10005472
CGI_10005487
CGI_10005570
CGI_10005796
CGI_10005825
CGI_10005870
CGI_10005940
CGI_10005961
CGI_10006022
CGI_10006313
CGI_10006322
CGI_10006343
CGI_10006375
CGI_10006403
CGI_10006405
CGI_10006430
CGI_10006467
CGI_10006529
CGI_10006547
CGI_10006579
CGI_10006739
CGI_10006803
CGI_10006860
CGI_10006951
CGI_10006953
CGI_10006975
CGI_10006996
CGI_10007026
CGI_10007059
CGI_10007214
CGI_10007216
CGI_10007234
CGI_10007343
CGI_10007572
CGI_10007625
CGI_10007701
CGI_10007771
CGI_10007796
CGI_10007801
CGI_10007930
CGI_10008051
CGI_10008056
CGI_10008274
CGI_10008284
CGI_10008401
CGI_10008412
CGI_10008538
CGI_10008593
CGI_10008686
CGI_10008777
CGI_10008805
CGI_10008811
CGI_10008864
CGI_10008892
CGI_10008906
CGI_10009015
CGI_10009029
CGI_10009111
CGI_10009125
CGI_10009282
CGI_10009379
CGI_10009424
CGI_10009425
CGI_10009524
CGI_10009528
CGI_10009534
CGI_10009696
CGI_10009705
CGI_10009814
CGI_10009849
CGI_10009974
CGI_10009993
CGI_10010010
CGI_10010072
CGI_10010310
CGI_10010520
CGI_10010613
CGI_10010706
CGI_10010709
CGI_10010713
CGI_10010758
CGI_10010828
CGI_10010847
CGI_10010849
CGI_10010854
CGI_10011108
CGI_10011117
CGI_10011155
CGI_10011160
CGI_10011200
CGI_10011619
CGI_10011630
CGI_10011714
CGI_10011802
CGI_10011851
CGI_10011867
CGI_10011944
CGI_10012019
CGI_10012022
CGI_10012094
CGI_10012171
CGI_10012186
CGI_10012187
CGI_10012196
CGI_10012199
CGI_10012223
CGI_10012291
CGI_10012317
CGI_10012378
CGI_10012383
CGI_10012418
CGI_10012431
CGI_10012637
CGI_10012718
CGI_10012765
CGI_10012805
CGI_10012818
CGI_10012866
CGI_10012883
CGI_10013296
CGI_10013366
CGI_10013373
CGI_10013374
CGI_10013700
CGI_10013929
CGI_10014061
CGI_10014285
CGI_10014573
CGI_10014602
CGI_10014624
CGI_10014634
CGI_10014648
CGI_10014701
CGI_10014747
CGI_10014759
CGI_10014868
CGI_10014885
CGI_10014888
CGI_10014943
CGI_10014955
CGI_10015081
CGI_10015082
CGI_10015138
CGI_10015192
CGI_10015195
CGI_10015226
CGI_10015274
CGI_10015300
CGI_10015427
CGI_10015476
CGI_10015491
CGI_10015560
CGI_10015784
CGI_10016103
CGI_10016209
CGI_10016523
CGI_10016589
CGI_10016636
CGI_10016691
CGI_10016706
CGI_10016803
CGI_10016982
CGI_10017032
CGI_10017078
CGI_10017099
CGI_10017127
CGI_10017142
CGI_10017259
CGI_10017392
CGI_10017401
CGI_10017486
CGI_10017504
CGI_10017692
CGI_10017762
CGI_10017839
CGI_10017860
CGI_10018073
CGI_10018128
CGI_10018228
CGI_10018506
CGI_10018533
CGI_10018562
CGI_10018712
CGI_10018756
CGI_10018828
CGI_10018936
CGI_10018991
CGI_10019079
CGI_10019100
CGI_10019123
CGI_10019156
CGI_10019208
CGI_10019259
CGI_10019261
CGI_10019269
CGI_10019273
CGI_10019335
CGI_10019390
CGI_10019544
CGI_10019550
CGI_10019569
CGI_10019579
CGI_10019585
CGI_10019590
CGI_10019658
CGI_10019668
CGI_10019670
CGI_10019696
CGI_10019804
CGI_10019856
CGI_10019918
CGI_10019931
CGI_10019933
CGI_10019949
CGI_10020133
CGI_10020161
CGI_10020162
CGI_10020179
CGI_10020371
CGI_10020382
CGI_10020443
CGI_10020475
CGI_10020477
CGI_10020498
CGI_10020500
CGI_10020582
CGI_10020614
CGI_10020639
CGI_10020698
CGI_10020732
CGI_10020739
CGI_10020770
CGI_10020890
CGI_10020942
CGI_10020964
CGI_10020966
CGI_10020971
CGI_10021127
CGI_10021223
CGI_10021242
CGI_10021254
CGI_10021257
CGI_10021263
CGI_10021567
CGI_10021679
CGI_10021745
CGI_10021751
CGI_10021787
CGI_10021811
CGI_10021823
CGI_10021830
CGI_10021851
CGI_10021853
CGI_10021856
CGI_10021889
CGI_10021903
CGI_10021933
CGI_10021937
CGI_10021960
CGI_10021979
CGI_10021983
CGI_10022007
CGI_10022026
CGI_10022075
CGI_10022152
CGI_10022184
CGI_10022561
CGI_10022855
CGI_10022856
CGI_10022884
CGI_10022985
CGI_10023091
CGI_10023242
CGI_10023264
CGI_10023265
CGI_10023364
CGI_10023402
CGI_10023410
CGI_10023422
CGI_10023429
CGI_10023441
CGI_10023522
CGI_10023576
CGI_10023724
CGI_10023785
CGI_10023811
CGI_10023852
CGI_10023941
CGI_10023950
CGI_10023953
CGI_10023990
CGI_10024121
CGI_10024150
CGI_10024169
CGI_10024242
CGI_10024267
CGI_10024477
CGI_10024527
CGI_10024544
CGI_10024665
CGI_10024974
CGI_10024986
CGI_10025026
CGI_10025068
CGI_10025069
CGI_10025156
CGI_10025174
CGI_10025187
CGI_10025343
CGI_10025365
CGI_10025403
CGI_10025428
CGI_10025524
CGI_10025580
CGI_10025654
CGI_10025684
CGI_10025763
CGI_10025826
CGI_10025849
CGI_10025997
CGI_10026036
CGI_10026246
CGI_10026326
CGI_10026424
CGI_10026537
CGI_10026589
CGI_10026590
CGI_10026596
CGI_10026597
CGI_10026680
CGI_10026788
CGI_10026810
CGI_10026972
CGI_10027083
CGI_10027165
CGI_10027187
CGI_10027234
CGI_10027261
CGI_10027263
CGI_10027307
CGI_10027342
CGI_10027396
CGI_10027401
CGI_10027463
CGI_10027590
CGI_10027605
CGI_10027675
CGI_10027757
CGI_10027772
CGI_10027813
CGI_10027910
CGI_10027973
CGI_10027977
CGI_10028008
CGI_10028104
CGI_10028150
CGI_10028193
CGI_10028209
CGI_10028314
CGI_10028337
CGI_10028339
CGI_10028452
CGI_10028469
CGI_10028534
CGI_10028549
CGI_10028653
CGI_10028772
CGI_10028797
CGI_10028884
CGI_10028885
