# Supplementary material for: Comparative Gene Analysis in Chordate Embryonic Development Reveals Co-existence of Von Baer’s and Haeckel’s Postulates
Source: Research Square preprint supplement (doi:10.21203/rs.3.rs-579345/v1), 2021-06-17
Supplement: Supplementary file 11 [file 0e7d0c8b986ca7e4da358227.xlsx]

## Sheet: 工作表1
Supplementary Data 3. Stage associated gene numbers for each species
	2cell	6	morula	blastocyst	E7.5	E8.5	E9.0	E9.5	E10.5	E11.5	E12.5	E13.5	E14.5	E15.5	E16.5	E17.5	E18.5
Mm	3017	2332	1682	2238	1735	845	353	103	160	304	402	192	230	301	670	1858	2264
	Prim	HH6	HH8	HH11	HH14	HH16	HH19	HH21	HH24	HH28	HH32	HH34	HH38
Gg	2468	977	871	449	314	198	71	221	819	727	909	955	1734
	Gastrula	Neurula	TK5	TK7	TK9	TK11	TK13	TK14	TK15	TK17	TK21	TK23	TK25	TK27
Ps	1872	2419	518	390	471	139	240	367	643	745	362	951	931	1829
	stage2	stage5	stage9	stage11	stage13	stage17	stage19	stage21	stage23	stage26	stage28	stage31	stage37	stage43	stage48	stage61	stage66
Xl	4170	5444	5184	2280	1675	1247	866	646	684	1164	758	579	1299	2147	4111	4286	4206
	stage2	stage5	stage9	stage11	stage13	stage17	stage19	stage21	stage23	stage26	stage28	stage31	stage37	stage43	stage48	stage61	stage66
Xt	2106	2562	3263	1574	904	728	928	164	131	140	248	306	1102	1419	2353	1446	1472
	2cell	8cell	32cell	30epiboly	shield	75epiboly	90epiboly	bud	6somite	14somite	prim5.6	prim25	48h	60h	72h
Dr	2122	2922	3626	1833	1493	543	392	306	674	1120	961	829	1143	3661	3911
	UFegg	32-64	blastula	G1	G5-6	N1	N3	L1	L2	L3	Juvenile
Bf	1889	2260	1050	1484	1523	1062	791	520	1339	2386	4006
	St1	St2	St4	St5	St6	St8	St10	St12	St14	St16	St19	St22	St24	St27	St29	St35	St37	St38	St40	laterJuvenile
Ci	2731	2120	1621	1140	674	610	1063	1113	889	742	930	1059	866	1257	1268	1216	1497	2211	1892	2270
	Cg_E	Cg_TC	Cg_FC	Cg_EM	Cg_M	Cg_B	Cg_RM	Cg_FS	Cg_EG	Cg_G	Cg_T	Cg_ED	Cg_D	Cg_EU	Cg_U	Cg_LU	Cg_P	Cg_S	Cg_J
Cg	1489	1900	1073	1743	1220	852	345	1214	1876	1075	933	1179	2288	1712	2512	2518	2246	3472	5551
We defined genes preferentially expressed at a particular developmental stage in each species following the method described in [8,21]. For each species, we required FPKM > 2 at a particular stage and Z-score (normalized FPKM across samples) representing the difference between this stage and the rest of stages > 1.5.
