# Supplementary material for: Comparative Gene Analysis in Chordate Embryonic Development Reveals Co-existence of Von Baer’s and Haeckel’s Postulates
Source: Research Square preprint supplement (doi:10.21203/rs.3.rs-579345/v1), 2021-06-17
Supplement: Supplementary file 12 [file 29b2e0b3e244c4a8e1e7eb02.xlsx]

## Sheet: PM
Supplementary Data 7. Bonferroni-corrected p-values of overlapping PM genes between pairwise species
	Gg	Ps	Xl	Xt	Dr	Bf	Ci	Cg
Gg	1309
Ps	0 | 90	433
Xl	0 | 46	0.0308 | 14	145
Xt	0 | 90	0 | 29	0 | 28	336
Dr	0 | 137	0.35 | 34	0 | 26	0 | 43	592
Bf	1 | 15	1 | 4	1 | 1	1 | 3	0.8232 | 12	114
Ci	1 | 20	1 | 8	1 | 1	1 | 3	0.21 | 14	0.014 | 8	119
Cg	1 | 22	1 | 5	1 | 2	1 | 2	1 | 11	0 | 14	0.0196 | 12	236
Gg: chicken Ps: turtle Xl & Xt: two kinds of frogs Dr: zebrafish Bf: amphioxus Ci: ciona Cg: oyster
content of cell: Bonferroni-corrected p value | number of overlapped PM genes between pairwise species
italic: Bonferroni-corrected p < 0.05

## Sheet: CM
Supplementary Data 7. Bonferroni-corrected p-values of overlapping CM genes between pairwise species
	Gg	Ps	Xl	Xt	Dr	Bf	Ci	Cg
Gg	638
Ps	0 | 176	1311
Xl	0 | 90	0 | 194	977
Xt	0 | 97	0 | 227	0 | 408	991
Dr	0.7588 | 55	0.0168 | 115	0 | 150	0 | 152	738
Bf	0.028 | 23	0 | 51	0 | 41	0 | 49	0.084 | 25	202
Ci	0.1792 | 26	0 | 70	0.0084 | 40	0.1008 | 37	1 | 24	0.56 | 13	260
Cg	0.0056 | 43	0 | 87	0 | 58	0 | 72	0 | 51	0 | 29	0.0112 | 28	406
Gg: chicken Ps: turtle Xl & Xt: two kinds of frogs Dr: zebrafish Bf: amphioxus Ci: ciona Cg: oyster
content of cell: Bonferroni-corrected p value | number of overlapped CM genes between pairwise species
italic : Bonferroni-corrected p < 0.05
