# Supplementary material for: Comparative Gene Analysis in Chordate Embryonic Development Reveals Co-existence of Von Baer’s and Haeckel’s Postulates
Source: Research Square preprint supplement (doi:10.21203/rs.3.rs-579345/v1), 2021-06-17
Supplement: Supplementary file 13 [file 2f9134e7dd7af4102215283c.xlsx]

## Sheet: Mus musculus
Supplementary Data 2. Developmental related gene list for each species
ENSMUSG00000000001
ENSMUSG00000000028
ENSMUSG00000000037
ENSMUSG00000000049
ENSMUSG00000000056
ENSMUSG00000000058
ENSMUSG00000000078
ENSMUSG00000000085
ENSMUSG00000000088
ENSMUSG00000000093
ENSMUSG00000000094
ENSMUSG00000000120
ENSMUSG00000000125
ENSMUSG00000000126
ENSMUSG00000000127
ENSMUSG00000000131
ENSMUSG00000000134
ENSMUSG00000000148
ENSMUSG00000000154
ENSMUSG00000000157
ENSMUSG00000000159
ENSMUSG00000000167
ENSMUSG00000000168
ENSMUSG00000000171
ENSMUSG00000000183
ENSMUSG00000000184
ENSMUSG00000000194
ENSMUSG00000000197
ENSMUSG00000000202
ENSMUSG00000000204
ENSMUSG00000000214
ENSMUSG00000000215
ENSMUSG00000000216
ENSMUSG00000000223
ENSMUSG00000000244
ENSMUSG00000000247
ENSMUSG00000000248
ENSMUSG00000000253
ENSMUSG00000000266
ENSMUSG00000000276
ENSMUSG00000000278
ENSMUSG00000000282
ENSMUSG00000000290
ENSMUSG00000000295
ENSMUSG00000000296
ENSMUSG00000000301
ENSMUSG00000000305
ENSMUSG00000000308
ENSMUSG00000000317
ENSMUSG00000000318
ENSMUSG00000000326
ENSMUSG00000000339
ENSMUSG00000000340
ENSMUSG00000000346
ENSMUSG00000000355
ENSMUSG00000000359
ENSMUSG00000000365
ENSMUSG00000000374
ENSMUSG00000000378
ENSMUSG00000000384
ENSMUSG00000000392
ENSMUSG00000000394
ENSMUSG00000000399
ENSMUSG00000000402
ENSMUSG00000000409
ENSMUSG00000000416
ENSMUSG00000000420
ENSMUSG00000000435
ENSMUSG00000000439
ENSMUSG00000000440
ENSMUSG00000000441
ENSMUSG00000000486
ENSMUSG00000000489
ENSMUSG00000000530
ENSMUSG00000000531
ENSMUSG00000000532
ENSMUSG00000000538
ENSMUSG00000000544
ENSMUSG00000000555
ENSMUSG00000000560
ENSMUSG00000000561
ENSMUSG00000000562
ENSMUSG00000000563
ENSMUSG00000000567
ENSMUSG00000000568
ENSMUSG00000000579
ENSMUSG00000000600
ENSMUSG00000000605
ENSMUSG00000000627
ENSMUSG00000000628
ENSMUSG00000000631
ENSMUSG00000000632
ENSMUSG00000000673
ENSMUSG00000000682
ENSMUSG00000000686
ENSMUSG00000000690
ENSMUSG00000000693
ENSMUSG00000000701
ENSMUSG00000000708
ENSMUSG00000000711
ENSMUSG00000000724
ENSMUSG00000000730
ENSMUSG00000000732
ENSMUSG00000000751
ENSMUSG00000000753
ENSMUSG00000000759
ENSMUSG00000000766
ENSMUSG00000000776
ENSMUSG00000000787
ENSMUSG00000000794
ENSMUSG00000000804
ENSMUSG00000000811
ENSMUSG00000000823
ENSMUSG00000000826
ENSMUSG00000000827
ENSMUSG00000000838
ENSMUSG00000000861
ENSMUSG00000000869
ENSMUSG00000000876
ENSMUSG00000000881
ENSMUSG00000000884
ENSMUSG00000000889
ENSMUSG00000000901
ENSMUSG00000000902
ENSMUSG00000000903
ENSMUSG00000000915
ENSMUSG00000000916
ENSMUSG00000000938
ENSMUSG00000000942
ENSMUSG00000000957
ENSMUSG00000000976
ENSMUSG00000000983
ENSMUSG00000001016
ENSMUSG00000001017
ENSMUSG00000001020
ENSMUSG00000001021
ENSMUSG00000001025
ENSMUSG00000001027
ENSMUSG00000001029
ENSMUSG00000001034
ENSMUSG00000001036
ENSMUSG00000001052
ENSMUSG00000001053
ENSMUSG00000001054
ENSMUSG00000001056
ENSMUSG00000001076
ENSMUSG00000001082
ENSMUSG00000001089
ENSMUSG00000001095
ENSMUSG00000001098
ENSMUSG00000001100
ENSMUSG00000001103
ENSMUSG00000001105
ENSMUSG00000001119
ENSMUSG00000001123
ENSMUSG00000001128
ENSMUSG00000001131
ENSMUSG00000001134
ENSMUSG00000001138
ENSMUSG00000001143
ENSMUSG00000001150
ENSMUSG00000001151
ENSMUSG00000001155
ENSMUSG00000001156
ENSMUSG00000001157
ENSMUSG00000001158
ENSMUSG00000001166
ENSMUSG00000001168
ENSMUSG00000001175
ENSMUSG00000001211
ENSMUSG00000001225
ENSMUSG00000001227
ENSMUSG00000001228
ENSMUSG00000001240
ENSMUSG00000001247
ENSMUSG00000001248
ENSMUSG00000001249
ENSMUSG00000001260
ENSMUSG00000001270
ENSMUSG00000001281
ENSMUSG00000001285
ENSMUSG00000001289
ENSMUSG00000001305
ENSMUSG00000001323
ENSMUSG00000001334
ENSMUSG00000001348
ENSMUSG00000001349
ENSMUSG00000001376
ENSMUSG00000001379
ENSMUSG00000001380
ENSMUSG00000001383
ENSMUSG00000001403
ENSMUSG00000001415
ENSMUSG00000001416
ENSMUSG00000001417
ENSMUSG00000001418
ENSMUSG00000001419
ENSMUSG00000001420
ENSMUSG00000001424
ENSMUSG00000001435
ENSMUSG00000001436
ENSMUSG00000001440
ENSMUSG00000001441
ENSMUSG00000001444
ENSMUSG00000001445
ENSMUSG00000001467
ENSMUSG00000001473
ENSMUSG00000001493
ENSMUSG00000001496
ENSMUSG00000001497
ENSMUSG00000001504
ENSMUSG00000001506
ENSMUSG00000001508
ENSMUSG00000001510
ENSMUSG00000001518
ENSMUSG00000001520
ENSMUSG00000001524
ENSMUSG00000001525
ENSMUSG00000001542
ENSMUSG00000001552
ENSMUSG00000001555
ENSMUSG00000001558
ENSMUSG00000001566
ENSMUSG00000001569
ENSMUSG00000001576
ENSMUSG00000001588
ENSMUSG00000001604
ENSMUSG00000001627
ENSMUSG00000001630
ENSMUSG00000001632
ENSMUSG00000001642
ENSMUSG00000001655
ENSMUSG00000001656
ENSMUSG00000001657
ENSMUSG00000001661
ENSMUSG00000001663
ENSMUSG00000001665
ENSMUSG00000001674
ENSMUSG00000001687
ENSMUSG00000001700
ENSMUSG00000001707
ENSMUSG00000001729
ENSMUSG00000001739
ENSMUSG00000001741
ENSMUSG00000001750
ENSMUSG00000001751
ENSMUSG00000001761
ENSMUSG00000001763
ENSMUSG00000001767
ENSMUSG00000001768
ENSMUSG00000001774
ENSMUSG00000001783
ENSMUSG00000001785
ENSMUSG00000001786
ENSMUSG00000001794
ENSMUSG00000001802
ENSMUSG00000001815
ENSMUSG00000001819
ENSMUSG00000001823
ENSMUSG00000001827
ENSMUSG00000001855
ENSMUSG00000001864
ENSMUSG00000001865
ENSMUSG00000001870
ENSMUSG00000001891
ENSMUSG00000001909
ENSMUSG00000001910
ENSMUSG00000001911
ENSMUSG00000001918
ENSMUSG00000001924
ENSMUSG00000001930
ENSMUSG00000001942
ENSMUSG00000001943
ENSMUSG00000001946
ENSMUSG00000001948
ENSMUSG00000001962
ENSMUSG00000001964
ENSMUSG00000001983
ENSMUSG00000001985
ENSMUSG00000001986
ENSMUSG00000001988
ENSMUSG00000001998
ENSMUSG00000001999
ENSMUSG00000002006
ENSMUSG00000002007
ENSMUSG00000002010
ENSMUSG00000002012
ENSMUSG00000002015
ENSMUSG00000002017
ENSMUSG00000002020
ENSMUSG00000002028
ENSMUSG00000002031
ENSMUSG00000002032
ENSMUSG00000002033
ENSMUSG00000002043
ENSMUSG00000002052
ENSMUSG00000002055
ENSMUSG00000002058
ENSMUSG00000002068
ENSMUSG00000002076
ENSMUSG00000002103
ENSMUSG00000002104
ENSMUSG00000002105
ENSMUSG00000002107
ENSMUSG00000002108
ENSMUSG00000002109
ENSMUSG00000002111
ENSMUSG00000002129
ENSMUSG00000002147
ENSMUSG00000002190
ENSMUSG00000002204
ENSMUSG00000002205
ENSMUSG00000002210
ENSMUSG00000002221
ENSMUSG00000002233
ENSMUSG00000002249
ENSMUSG00000002257
ENSMUSG00000002265
ENSMUSG00000002266
ENSMUSG00000002274
ENSMUSG00000002279
ENSMUSG00000002280
ENSMUSG00000002297
ENSMUSG00000002307
ENSMUSG00000002308
ENSMUSG00000002319
ENSMUSG00000002325
ENSMUSG00000002326
ENSMUSG00000002329
ENSMUSG00000002332
ENSMUSG00000002341
ENSMUSG00000002342
ENSMUSG00000002343
ENSMUSG00000002345
ENSMUSG00000002346
ENSMUSG00000002365
ENSMUSG00000002372
ENSMUSG00000002379
ENSMUSG00000002393
ENSMUSG00000002396
ENSMUSG00000002409
ENSMUSG00000002413
ENSMUSG00000002416
ENSMUSG00000002428
ENSMUSG00000002455
ENSMUSG00000002459
ENSMUSG00000002475
ENSMUSG00000002477
ENSMUSG00000002489
ENSMUSG00000002496
ENSMUSG00000002500
ENSMUSG00000002504
ENSMUSG00000002524
ENSMUSG00000002546
ENSMUSG00000002550
ENSMUSG00000002580
ENSMUSG00000002588
ENSMUSG00000002602
ENSMUSG00000002603
ENSMUSG00000002608
ENSMUSG00000002617
ENSMUSG00000002633
ENSMUSG00000002635
ENSMUSG00000002658
ENSMUSG00000002660
ENSMUSG00000002668
ENSMUSG00000002679
ENSMUSG00000002699
ENSMUSG00000002718
ENSMUSG00000002728
ENSMUSG00000002731
ENSMUSG00000002732
ENSMUSG00000002733
ENSMUSG00000002741
ENSMUSG00000002748
ENSMUSG00000002763
ENSMUSG00000002767
ENSMUSG00000002769
ENSMUSG00000002771
ENSMUSG00000002781
ENSMUSG00000002797
ENSMUSG00000002799
ENSMUSG00000002804
ENSMUSG00000002808
ENSMUSG00000002814
ENSMUSG00000002820
ENSMUSG00000002825
ENSMUSG00000002831
ENSMUSG00000002833
ENSMUSG00000002835
ENSMUSG00000002844
ENSMUSG00000002845
ENSMUSG00000002846
ENSMUSG00000002847
ENSMUSG00000002870
ENSMUSG00000002871
ENSMUSG00000002881
ENSMUSG00000002897
ENSMUSG00000002908
ENSMUSG00000002910
ENSMUSG00000002930
ENSMUSG00000002944
ENSMUSG00000002948
ENSMUSG00000002949
ENSMUSG00000002963
ENSMUSG00000002968
ENSMUSG00000002980
ENSMUSG00000002981
ENSMUSG00000002983
ENSMUSG00000002984
ENSMUSG00000002996
ENSMUSG00000002997
ENSMUSG00000003031
ENSMUSG00000003032
ENSMUSG00000003033
ENSMUSG00000003037
ENSMUSG00000003038
ENSMUSG00000003068
ENSMUSG00000003070
ENSMUSG00000003099
ENSMUSG00000003123
ENSMUSG00000003131
ENSMUSG00000003134
ENSMUSG00000003135
ENSMUSG00000003154
ENSMUSG00000003161
ENSMUSG00000003166
ENSMUSG00000003178
ENSMUSG00000003190
ENSMUSG00000003198
ENSMUSG00000003199
ENSMUSG00000003200
ENSMUSG00000003206
ENSMUSG00000003208
ENSMUSG00000003226
ENSMUSG00000003228
ENSMUSG00000003233
ENSMUSG00000003234
ENSMUSG00000003235
ENSMUSG00000003269
ENSMUSG00000003271
ENSMUSG00000003273
ENSMUSG00000003279
ENSMUSG00000003283
ENSMUSG00000003299
ENSMUSG00000003308
ENSMUSG00000003309
ENSMUSG00000003316
ENSMUSG00000003346
ENSMUSG00000003348
ENSMUSG00000003352
ENSMUSG00000003354
ENSMUSG00000003355
ENSMUSG00000003360
ENSMUSG00000003378
ENSMUSG00000003379
ENSMUSG00000003380
ENSMUSG00000003382
ENSMUSG00000003402
ENSMUSG00000003410
ENSMUSG00000003411
ENSMUSG00000003418
ENSMUSG00000003420
ENSMUSG00000003421
ENSMUSG00000003429
ENSMUSG00000003435
ENSMUSG00000003436
ENSMUSG00000003437
ENSMUSG00000003438
ENSMUSG00000003444
ENSMUSG00000003452
ENSMUSG00000003458
ENSMUSG00000003464
ENSMUSG00000003469
ENSMUSG00000003477
ENSMUSG00000003500
ENSMUSG00000003518
ENSMUSG00000003526
ENSMUSG00000003527
ENSMUSG00000003528
ENSMUSG00000003531
ENSMUSG00000003534
ENSMUSG00000003541
ENSMUSG00000003545
ENSMUSG00000003546
ENSMUSG00000003549
ENSMUSG00000003555
ENSMUSG00000003559
ENSMUSG00000003573
ENSMUSG00000003575
ENSMUSG00000003581
ENSMUSG00000003604
ENSMUSG00000003617
ENSMUSG00000003623
ENSMUSG00000003657
ENSMUSG00000003660
ENSMUSG00000003662
ENSMUSG00000003665
ENSMUSG00000003680
ENSMUSG00000003721
ENSMUSG00000003731
ENSMUSG00000003746
ENSMUSG00000003752
ENSMUSG00000003762
ENSMUSG00000003778
ENSMUSG00000003779
ENSMUSG00000003808
ENSMUSG00000003812
ENSMUSG00000003813
ENSMUSG00000003824
ENSMUSG00000003847
ENSMUSG00000003848
ENSMUSG00000003849
ENSMUSG00000003863
ENSMUSG00000003865
ENSMUSG00000003868
ENSMUSG00000003872
ENSMUSG00000003873
ENSMUSG00000003923
ENSMUSG00000003929
ENSMUSG00000003934
ENSMUSG00000003948
ENSMUSG00000003949
ENSMUSG00000003955
ENSMUSG00000003970
ENSMUSG00000003974
ENSMUSG00000003992
ENSMUSG00000004018
ENSMUSG00000004031
ENSMUSG00000004032
ENSMUSG00000004035
ENSMUSG00000004038
ENSMUSG00000004043
ENSMUSG00000004044
ENSMUSG00000004056
ENSMUSG00000004069
ENSMUSG00000004071
ENSMUSG00000004085
ENSMUSG00000004096
ENSMUSG00000004098
ENSMUSG00000004099
ENSMUSG00000004100
ENSMUSG00000004105
ENSMUSG00000004110
ENSMUSG00000004113
ENSMUSG00000004127
ENSMUSG00000004151
ENSMUSG00000004207
ENSMUSG00000004264
ENSMUSG00000004267
ENSMUSG00000004268
ENSMUSG00000004285
ENSMUSG00000004328
ENSMUSG00000004347
ENSMUSG00000004356
ENSMUSG00000004359
ENSMUSG00000004360
ENSMUSG00000004364
ENSMUSG00000004366
ENSMUSG00000004383
ENSMUSG00000004393
ENSMUSG00000004394
ENSMUSG00000004415
ENSMUSG00000004446
ENSMUSG00000004451
ENSMUSG00000004455
ENSMUSG00000004460
ENSMUSG00000004462
ENSMUSG00000004473
ENSMUSG00000004500
ENSMUSG00000004508
ENSMUSG00000004530
ENSMUSG00000004535
ENSMUSG00000004540
ENSMUSG00000004552
ENSMUSG00000004558
ENSMUSG00000004561
ENSMUSG00000004562
ENSMUSG00000004567
ENSMUSG00000004591
ENSMUSG00000004609
ENSMUSG00000004610
ENSMUSG00000004612
ENSMUSG00000004613
ENSMUSG00000004626
ENSMUSG00000004631
ENSMUSG00000004637
ENSMUSG00000004642
ENSMUSG00000004655
ENSMUSG00000004661
ENSMUSG00000004665
ENSMUSG00000004667
ENSMUSG00000004677
ENSMUSG00000004698
ENSMUSG00000004730
ENSMUSG00000004768
ENSMUSG00000004771
ENSMUSG00000004788
ENSMUSG00000004789
ENSMUSG00000004791
ENSMUSG00000004798
ENSMUSG00000004814
ENSMUSG00000004815
ENSMUSG00000004821
ENSMUSG00000004837
ENSMUSG00000004849
ENSMUSG00000004864
ENSMUSG00000004865
ENSMUSG00000004872
ENSMUSG00000004880
ENSMUSG00000004885
ENSMUSG00000004891
ENSMUSG00000004892
ENSMUSG00000004895
ENSMUSG00000004896
ENSMUSG00000004897
ENSMUSG00000004902
ENSMUSG00000004929
ENSMUSG00000004931
ENSMUSG00000004933
ENSMUSG00000004934
ENSMUSG00000004936
ENSMUSG00000004937
ENSMUSG00000004939
ENSMUSG00000004945
ENSMUSG00000004947
ENSMUSG00000004948
ENSMUSG00000004951
ENSMUSG00000004952
ENSMUSG00000004961
ENSMUSG00000004980
ENSMUSG00000004994
ENSMUSG00000004996
ENSMUSG00000005034
ENSMUSG00000005045
ENSMUSG00000005057
ENSMUSG00000005078
ENSMUSG00000005087
ENSMUSG00000005089
ENSMUSG00000005107
ENSMUSG00000005124
ENSMUSG00000005125
ENSMUSG00000005131
ENSMUSG00000005142
ENSMUSG00000005148
ENSMUSG00000005150
ENSMUSG00000005161
ENSMUSG00000005198
ENSMUSG00000005202
ENSMUSG00000005204
ENSMUSG00000005220
ENSMUSG00000005233
ENSMUSG00000005237
ENSMUSG00000005251
ENSMUSG00000005267
ENSMUSG00000005268
ENSMUSG00000005299
ENSMUSG00000005312
ENSMUSG00000005320
ENSMUSG00000005338
ENSMUSG00000005354
ENSMUSG00000005355
ENSMUSG00000005357
ENSMUSG00000005360
ENSMUSG00000005370
ENSMUSG00000005373
ENSMUSG00000005374
ENSMUSG00000005378
ENSMUSG00000005397
ENSMUSG00000005410
ENSMUSG00000005413
ENSMUSG00000005417
ENSMUSG00000005442
ENSMUSG00000005447
ENSMUSG00000005469
ENSMUSG00000005470
ENSMUSG00000005481
ENSMUSG00000005483
ENSMUSG00000005493
ENSMUSG00000005501
ENSMUSG00000005505
ENSMUSG00000005506
ENSMUSG00000005510
ENSMUSG00000005533
ENSMUSG00000005534
ENSMUSG00000005547
ENSMUSG00000005553
ENSMUSG00000005566
ENSMUSG00000005575
ENSMUSG00000005580
ENSMUSG00000005583
ENSMUSG00000005609
ENSMUSG00000005610
ENSMUSG00000005611
ENSMUSG00000005615
ENSMUSG00000005621
ENSMUSG00000005625
ENSMUSG00000005628
ENSMUSG00000005656
ENSMUSG00000005667
ENSMUSG00000005674
ENSMUSG00000005677
ENSMUSG00000005681
ENSMUSG00000005682
ENSMUSG00000005683
ENSMUSG00000005686
ENSMUSG00000005687
ENSMUSG00000005698
ENSMUSG00000005705
ENSMUSG00000005716
ENSMUSG00000005718
ENSMUSG00000005732
ENSMUSG00000005763
ENSMUSG00000005779
ENSMUSG00000005800
ENSMUSG00000005803
ENSMUSG00000005804
ENSMUSG00000005813
ENSMUSG00000005836
ENSMUSG00000005846
ENSMUSG00000005871
ENSMUSG00000005873
ENSMUSG00000005882
ENSMUSG00000005893
ENSMUSG00000005897
ENSMUSG00000005899
ENSMUSG00000005907
ENSMUSG00000005917
ENSMUSG00000005936
ENSMUSG00000005947
ENSMUSG00000005949
ENSMUSG00000005950
ENSMUSG00000005951
ENSMUSG00000005968
ENSMUSG00000005973
ENSMUSG00000005980
ENSMUSG00000005983
ENSMUSG00000005986
ENSMUSG00000005994
ENSMUSG00000006005
ENSMUSG00000006014
ENSMUSG00000006050
ENSMUSG00000006056
ENSMUSG00000006057
ENSMUSG00000006058
ENSMUSG00000006095
ENSMUSG00000006127
ENSMUSG00000006143
ENSMUSG00000006154
ENSMUSG00000006169
ENSMUSG00000006179
ENSMUSG00000006191
ENSMUSG00000006205
ENSMUSG00000006215
ENSMUSG00000006218
ENSMUSG00000006221
ENSMUSG00000006235
ENSMUSG00000006241
ENSMUSG00000006262
ENSMUSG00000006269
ENSMUSG00000006270
ENSMUSG00000006276
ENSMUSG00000006288
ENSMUSG00000006289
ENSMUSG00000006299
ENSMUSG00000006301
ENSMUSG00000006304
ENSMUSG00000006307
ENSMUSG00000006310
ENSMUSG00000006315
ENSMUSG00000006333
ENSMUSG00000006335
ENSMUSG00000006344
ENSMUSG00000006360
ENSMUSG00000006369
ENSMUSG00000006386
ENSMUSG00000006389
ENSMUSG00000006390
ENSMUSG00000006392
ENSMUSG00000006395
ENSMUSG00000006398
ENSMUSG00000006403
ENSMUSG00000006411
ENSMUSG00000006412
ENSMUSG00000006418
ENSMUSG00000006423
ENSMUSG00000006435
ENSMUSG00000006442
ENSMUSG00000006445
ENSMUSG00000006456
ENSMUSG00000006457
ENSMUSG00000006463
ENSMUSG00000006464
ENSMUSG00000006469
ENSMUSG00000006471
ENSMUSG00000006476
ENSMUSG00000006498
ENSMUSG00000006522
ENSMUSG00000006529
ENSMUSG00000006542
ENSMUSG00000006546
ENSMUSG00000006574
ENSMUSG00000006575
ENSMUSG00000006576
ENSMUSG00000006586
ENSMUSG00000006599
ENSMUSG00000006611
ENSMUSG00000006641
ENSMUSG00000006642
ENSMUSG00000006649
ENSMUSG00000006651
ENSMUSG00000006673
ENSMUSG00000006676
ENSMUSG00000006678
ENSMUSG00000006699
ENSMUSG00000006711
ENSMUSG00000006715
ENSMUSG00000006717
ENSMUSG00000006720
ENSMUSG00000006724
ENSMUSG00000006728
ENSMUSG00000006732
ENSMUSG00000006736
ENSMUSG00000006740
ENSMUSG00000006763
ENSMUSG00000006764
ENSMUSG00000006777
ENSMUSG00000006782
ENSMUSG00000006800
ENSMUSG00000006850
ENSMUSG00000006906
ENSMUSG00000006920
ENSMUSG00000006930
ENSMUSG00000006932
ENSMUSG00000006941
ENSMUSG00000006958
ENSMUSG00000006998
ENSMUSG00000007021
ENSMUSG00000007029
ENSMUSG00000007033
ENSMUSG00000007036
ENSMUSG00000007038
ENSMUSG00000007039
ENSMUSG00000007041
ENSMUSG00000007050
ENSMUSG00000007080
ENSMUSG00000007097
ENSMUSG00000007122
ENSMUSG00000007207
ENSMUSG00000007216
ENSMUSG00000007279
ENSMUSG00000007338
ENSMUSG00000007379
ENSMUSG00000007411
ENSMUSG00000007415
ENSMUSG00000007440
ENSMUSG00000007458
ENSMUSG00000007476
ENSMUSG00000007570
ENSMUSG00000007589
ENSMUSG00000007594
ENSMUSG00000007603
ENSMUSG00000007610
ENSMUSG00000007613
ENSMUSG00000007646
ENSMUSG00000007653
ENSMUSG00000007655
ENSMUSG00000007656
ENSMUSG00000007659
ENSMUSG00000007670
ENSMUSG00000007682
ENSMUSG00000007721
ENSMUSG00000007739
ENSMUSG00000007777
ENSMUSG00000007783
ENSMUSG00000007805
ENSMUSG00000007812
ENSMUSG00000007817
ENSMUSG00000007827
ENSMUSG00000007833
ENSMUSG00000007836
ENSMUSG00000007850
ENSMUSG00000007877
ENSMUSG00000007880
ENSMUSG00000007888
ENSMUSG00000007892
ENSMUSG00000007908
ENSMUSG00000007944
ENSMUSG00000007946
ENSMUSG00000007950
ENSMUSG00000007987
ENSMUSG00000007989
ENSMUSG00000008035
ENSMUSG00000008036
ENSMUSG00000008090
ENSMUSG00000008129
ENSMUSG00000008136
ENSMUSG00000008153
ENSMUSG00000008167
ENSMUSG00000008193
ENSMUSG00000008200
ENSMUSG00000008226
ENSMUSG00000008301
ENSMUSG00000008305
ENSMUSG00000008307
ENSMUSG00000008333
ENSMUSG00000008348
ENSMUSG00000008373
ENSMUSG00000008384
ENSMUSG00000008398
ENSMUSG00000008429
ENSMUSG00000008435
ENSMUSG00000008450
ENSMUSG00000008489
ENSMUSG00000008496
ENSMUSG00000008540
ENSMUSG00000008575
ENSMUSG00000008601
ENSMUSG00000008604
ENSMUSG00000008658
ENSMUSG00000008668
ENSMUSG00000008682
ENSMUSG00000008683
ENSMUSG00000008690
ENSMUSG00000008730
ENSMUSG00000008734
ENSMUSG00000008763
ENSMUSG00000008822
ENSMUSG00000008843
ENSMUSG00000008845
ENSMUSG00000008855
ENSMUSG00000008859
ENSMUSG00000008874
ENSMUSG00000008892
ENSMUSG00000008958
ENSMUSG00000008976
ENSMUSG00000008999
ENSMUSG00000009013
ENSMUSG00000009030
ENSMUSG00000009035
ENSMUSG00000009070
ENSMUSG00000009075
ENSMUSG00000009076
ENSMUSG00000009079
ENSMUSG00000009092
ENSMUSG00000009097
ENSMUSG00000009112
ENSMUSG00000009114
ENSMUSG00000009145
ENSMUSG00000009207
ENSMUSG00000009214
ENSMUSG00000009216
ENSMUSG00000009246
ENSMUSG00000009281
ENSMUSG00000009291
ENSMUSG00000009292
ENSMUSG00000009350
ENSMUSG00000009356
ENSMUSG00000009376
ENSMUSG00000009378
ENSMUSG00000009394
ENSMUSG00000009406
ENSMUSG00000009418
ENSMUSG00000009470
ENSMUSG00000009471
ENSMUSG00000009535
ENSMUSG00000009545
ENSMUSG00000009549
ENSMUSG00000009555
ENSMUSG00000009563
ENSMUSG00000009566
ENSMUSG00000009569
ENSMUSG00000009575
ENSMUSG00000009614
ENSMUSG00000009621
ENSMUSG00000009628
ENSMUSG00000009630
ENSMUSG00000009633
ENSMUSG00000009640
ENSMUSG00000009647
ENSMUSG00000009654
ENSMUSG00000009670
ENSMUSG00000009681
ENSMUSG00000009687
ENSMUSG00000009733
ENSMUSG00000009734
ENSMUSG00000009739
ENSMUSG00000009772
ENSMUSG00000009828
ENSMUSG00000009863
ENSMUSG00000009876
ENSMUSG00000009900
ENSMUSG00000009905
ENSMUSG00000009907
ENSMUSG00000009927
ENSMUSG00000009941
ENSMUSG00000010021
ENSMUSG00000010025
ENSMUSG00000010044
ENSMUSG00000010047
ENSMUSG00000010051
ENSMUSG00000010054
ENSMUSG00000010057
ENSMUSG00000010064
ENSMUSG00000010066
ENSMUSG00000010086
ENSMUSG00000010095
ENSMUSG00000010097
ENSMUSG00000010110
ENSMUSG00000010122
ENSMUSG00000010136
ENSMUSG00000010142
ENSMUSG00000010175
ENSMUSG00000010205
ENSMUSG00000010277
ENSMUSG00000010290
ENSMUSG00000010307
ENSMUSG00000010311
ENSMUSG00000010342
ENSMUSG00000010358
ENSMUSG00000010362
ENSMUSG00000010376
ENSMUSG00000010392
ENSMUSG00000010406
ENSMUSG00000010453
ENSMUSG00000010461
ENSMUSG00000010476
ENSMUSG00000010505
ENSMUSG00000010517
ENSMUSG00000010529
ENSMUSG00000010554
ENSMUSG00000010592
ENSMUSG00000010601
ENSMUSG00000010608
ENSMUSG00000010609
ENSMUSG00000010651
ENSMUSG00000010663
ENSMUSG00000010721
ENSMUSG00000010751
ENSMUSG00000010755
ENSMUSG00000010796
ENSMUSG00000010797
ENSMUSG00000010803
ENSMUSG00000010830
ENSMUSG00000010911
ENSMUSG00000010914
ENSMUSG00000010936
ENSMUSG00000011034
ENSMUSG00000011096
ENSMUSG00000011114
ENSMUSG00000011118
ENSMUSG00000011148
ENSMUSG00000011154
ENSMUSG00000011171
ENSMUSG00000011179
ENSMUSG00000011254
ENSMUSG00000011256
ENSMUSG00000011257
ENSMUSG00000011263
ENSMUSG00000011267
ENSMUSG00000011305
ENSMUSG00000011306
ENSMUSG00000011382
ENSMUSG00000011427
ENSMUSG00000011463
ENSMUSG00000011486
ENSMUSG00000011632
ENSMUSG00000011658
ENSMUSG00000011751
ENSMUSG00000011752
ENSMUSG00000011831
ENSMUSG00000011832
ENSMUSG00000011837
ENSMUSG00000011884
ENSMUSG00000011958
ENSMUSG00000011960
ENSMUSG00000012017
ENSMUSG00000012114
ENSMUSG00000012126
ENSMUSG00000012296
ENSMUSG00000012350
ENSMUSG00000012405
ENSMUSG00000012422
ENSMUSG00000012428
ENSMUSG00000012429
ENSMUSG00000012443
ENSMUSG00000012483
ENSMUSG00000012520
ENSMUSG00000012535
ENSMUSG00000012609
ENSMUSG00000012640
ENSMUSG00000012705
ENSMUSG00000012848
ENSMUSG00000012889
ENSMUSG00000013033
ENSMUSG00000013076
ENSMUSG00000013150
ENSMUSG00000013155
ENSMUSG00000013160
ENSMUSG00000013236
ENSMUSG00000013275
ENSMUSG00000013367
ENSMUSG00000013415
ENSMUSG00000013419
ENSMUSG00000013465
ENSMUSG00000013523
ENSMUSG00000013539
ENSMUSG00000013584
ENSMUSG00000013593
ENSMUSG00000013611
ENSMUSG00000013622
ENSMUSG00000013629
ENSMUSG00000013643
ENSMUSG00000013646
ENSMUSG00000013662
ENSMUSG00000013663
ENSMUSG00000013698
ENSMUSG00000013701
ENSMUSG00000013707
ENSMUSG00000013736
ENSMUSG00000013766
ENSMUSG00000013787
ENSMUSG00000013822
ENSMUSG00000013833
ENSMUSG00000013846
ENSMUSG00000013858
ENSMUSG00000013921
ENSMUSG00000013936
ENSMUSG00000013973
ENSMUSG00000013974
ENSMUSG00000014030
ENSMUSG00000014075
ENSMUSG00000014077
ENSMUSG00000014158
ENSMUSG00000014164
ENSMUSG00000014177
ENSMUSG00000014195
ENSMUSG00000014198
ENSMUSG00000014226
ENSMUSG00000014243
ENSMUSG00000014245
ENSMUSG00000014294
ENSMUSG00000014301
ENSMUSG00000014303
ENSMUSG00000014313
ENSMUSG00000014329
ENSMUSG00000014349
ENSMUSG00000014351
ENSMUSG00000014355
ENSMUSG00000014361
ENSMUSG00000014402
ENSMUSG00000014418
ENSMUSG00000014426
ENSMUSG00000014498
ENSMUSG00000014503
ENSMUSG00000014504
ENSMUSG00000014542
ENSMUSG00000014547
ENSMUSG00000014550
ENSMUSG00000014551
ENSMUSG00000014554
ENSMUSG00000014592
ENSMUSG00000014599
ENSMUSG00000014601
ENSMUSG00000014602
ENSMUSG00000014603
ENSMUSG00000014609
ENSMUSG00000014633
ENSMUSG00000014668
ENSMUSG00000014704
ENSMUSG00000014763
ENSMUSG00000014767
ENSMUSG00000014769
ENSMUSG00000014771
ENSMUSG00000014773
ENSMUSG00000014776
ENSMUSG00000014778
ENSMUSG00000014782
ENSMUSG00000014786
ENSMUSG00000014813
ENSMUSG00000014837
ENSMUSG00000014846
ENSMUSG00000014850
ENSMUSG00000014859
ENSMUSG00000014873
ENSMUSG00000014905
ENSMUSG00000014907
ENSMUSG00000014932
ENSMUSG00000014956
ENSMUSG00000014959
ENSMUSG00000014980
ENSMUSG00000015001
ENSMUSG00000015023
ENSMUSG00000015083
ENSMUSG00000015085
ENSMUSG00000015087
ENSMUSG00000015090
ENSMUSG00000015093
ENSMUSG00000015095
ENSMUSG00000015112
ENSMUSG00000015120
ENSMUSG00000015126
ENSMUSG00000015127
ENSMUSG00000015133
ENSMUSG00000015134
ENSMUSG00000015143
ENSMUSG00000015149
ENSMUSG00000015165
ENSMUSG00000015176
ENSMUSG00000015189
ENSMUSG00000015214
ENSMUSG00000015217
ENSMUSG00000015222
ENSMUSG00000015224
ENSMUSG00000015243
ENSMUSG00000015289
ENSMUSG00000015290
ENSMUSG00000015291
ENSMUSG00000015305
ENSMUSG00000015312
ENSMUSG00000015316
ENSMUSG00000015340
ENSMUSG00000015341
ENSMUSG00000015342
ENSMUSG00000015354
ENSMUSG00000015355
ENSMUSG00000015357
ENSMUSG00000015363
ENSMUSG00000015365
ENSMUSG00000015377
ENSMUSG00000015396
ENSMUSG00000015401
ENSMUSG00000015405
ENSMUSG00000015452
ENSMUSG00000015461
ENSMUSG00000015467
ENSMUSG00000015468
ENSMUSG00000015474
ENSMUSG00000015476
ENSMUSG00000015478
ENSMUSG00000015488
ENSMUSG00000015501
ENSMUSG00000015522
ENSMUSG00000015533
ENSMUSG00000015536
ENSMUSG00000015568
ENSMUSG00000015575
ENSMUSG00000015597
ENSMUSG00000015599
ENSMUSG00000015605
ENSMUSG00000015652
ENSMUSG00000015656
ENSMUSG00000015659
ENSMUSG00000015668
ENSMUSG00000015671
ENSMUSG00000015672
ENSMUSG00000015697
ENSMUSG00000015709
ENSMUSG00000015711
ENSMUSG00000015714
ENSMUSG00000015721
ENSMUSG00000015733
ENSMUSG00000015745
ENSMUSG00000015747
ENSMUSG00000015748
ENSMUSG00000015749
ENSMUSG00000015750
ENSMUSG00000015757
ENSMUSG00000015759
ENSMUSG00000015776
ENSMUSG00000015787
ENSMUSG00000015790
ENSMUSG00000015804
ENSMUSG00000015806
ENSMUSG00000015812
ENSMUSG00000015843
ENSMUSG00000015850
ENSMUSG00000015852
ENSMUSG00000015854
ENSMUSG00000015869
ENSMUSG00000015880
ENSMUSG00000015882
ENSMUSG00000015889
ENSMUSG00000015890
ENSMUSG00000015932
ENSMUSG00000015937
ENSMUSG00000015942
ENSMUSG00000015943
ENSMUSG00000015944
ENSMUSG00000015947
ENSMUSG00000015950
ENSMUSG00000015957
ENSMUSG00000015961
ENSMUSG00000015966
ENSMUSG00000015968
ENSMUSG00000015970
ENSMUSG00000015971
ENSMUSG00000015981
ENSMUSG00000015994
ENSMUSG00000016018
ENSMUSG00000016024
ENSMUSG00000016028
ENSMUSG00000016087
ENSMUSG00000016128
ENSMUSG00000016150
ENSMUSG00000016179
ENSMUSG00000016181
ENSMUSG00000016194
ENSMUSG00000016200
ENSMUSG00000016239
ENSMUSG00000016252
ENSMUSG00000016253
ENSMUSG00000016255
ENSMUSG00000016262
ENSMUSG00000016308
ENSMUSG00000016319
ENSMUSG00000016327
ENSMUSG00000016344
ENSMUSG00000016346
ENSMUSG00000016349
ENSMUSG00000016356
ENSMUSG00000016382
ENSMUSG00000016386
ENSMUSG00000016409
ENSMUSG00000016427
ENSMUSG00000016458
ENSMUSG00000016477
ENSMUSG00000016493
ENSMUSG00000016494
ENSMUSG00000016495
ENSMUSG00000016496
ENSMUSG00000016503
ENSMUSG00000016510
ENSMUSG00000016526
ENSMUSG00000016528
ENSMUSG00000016534
ENSMUSG00000016541
ENSMUSG00000016552
ENSMUSG00000016554
ENSMUSG00000016559
ENSMUSG00000016619
ENSMUSG00000016624
ENSMUSG00000016626
ENSMUSG00000016637
ENSMUSG00000016664
ENSMUSG00000016756
ENSMUSG00000016757
ENSMUSG00000016763
ENSMUSG00000016833
ENSMUSG00000016918
ENSMUSG00000016921
ENSMUSG00000016933
ENSMUSG00000016940
ENSMUSG00000016942
ENSMUSG00000016946
ENSMUSG00000016984
ENSMUSG00000016995
ENSMUSG00000017002
ENSMUSG00000017007
ENSMUSG00000017057
ENSMUSG00000017132
ENSMUSG00000017144
ENSMUSG00000017146
ENSMUSG00000017167
ENSMUSG00000017188
ENSMUSG00000017204
ENSMUSG00000017210
ENSMUSG00000017221
ENSMUSG00000017264
ENSMUSG00000017286
ENSMUSG00000017299
ENSMUSG00000017300
ENSMUSG00000017309
ENSMUSG00000017311
ENSMUSG00000017314
ENSMUSG00000017344
ENSMUSG00000017376
ENSMUSG00000017386
ENSMUSG00000017390
ENSMUSG00000017400
ENSMUSG00000017404
ENSMUSG00000017412
ENSMUSG00000017418
ENSMUSG00000017421
ENSMUSG00000017428
ENSMUSG00000017446
ENSMUSG00000017453
ENSMUSG00000017466
ENSMUSG00000017485
ENSMUSG00000017493
ENSMUSG00000017499
ENSMUSG00000017548
ENSMUSG00000017550
ENSMUSG00000017561
ENSMUSG00000017588
ENSMUSG00000017631
ENSMUSG00000017639
ENSMUSG00000017652
ENSMUSG00000017664
ENSMUSG00000017667
ENSMUSG00000017670
ENSMUSG00000017677
ENSMUSG00000017679
ENSMUSG00000017686
ENSMUSG00000017688
ENSMUSG00000017692
ENSMUSG00000017713
ENSMUSG00000017715
ENSMUSG00000017716
ENSMUSG00000017718
ENSMUSG00000017721
ENSMUSG00000017723
ENSMUSG00000017724
ENSMUSG00000017734
ENSMUSG00000017737
ENSMUSG00000017740
ENSMUSG00000017754
ENSMUSG00000017756
ENSMUSG00000017760
ENSMUSG00000017764
ENSMUSG00000017765
ENSMUSG00000017767
ENSMUSG00000017774
ENSMUSG00000017778
ENSMUSG00000017802
ENSMUSG00000017817
ENSMUSG00000017831
ENSMUSG00000017832
ENSMUSG00000017837
ENSMUSG00000017858
ENSMUSG00000017861
ENSMUSG00000017868
ENSMUSG00000017897
ENSMUSG00000017914
ENSMUSG00000017943
ENSMUSG00000017969
ENSMUSG00000017978
ENSMUSG00000017999
ENSMUSG00000018001
ENSMUSG00000018008
ENSMUSG00000018012
ENSMUSG00000018040
ENSMUSG00000018042
ENSMUSG00000018068
ENSMUSG00000018076
ENSMUSG00000018102
ENSMUSG00000018126
ENSMUSG00000018143
ENSMUSG00000018160
ENSMUSG00000018168
ENSMUSG00000018169
ENSMUSG00000018171
ENSMUSG00000018189
ENSMUSG00000018196
ENSMUSG00000018199
ENSMUSG00000018209
ENSMUSG00000018211
ENSMUSG00000018217
ENSMUSG00000018238
ENSMUSG00000018239
ENSMUSG00000018263
ENSMUSG00000018286
ENSMUSG00000018287
ENSMUSG00000018293
ENSMUSG00000018322
ENSMUSG00000018326
ENSMUSG00000018334
ENSMUSG00000018340
ENSMUSG00000018347
ENSMUSG00000018362
ENSMUSG00000018377
ENSMUSG00000018378
ENSMUSG00000018379
ENSMUSG00000018381
ENSMUSG00000018395
ENSMUSG00000018398
ENSMUSG00000018401
ENSMUSG00000018405
ENSMUSG00000018411
ENSMUSG00000018412
ENSMUSG00000018425
ENSMUSG00000018427
ENSMUSG00000018428
ENSMUSG00000018433
ENSMUSG00000018446
ENSMUSG00000018449
ENSMUSG00000018459
ENSMUSG00000018470
ENSMUSG00000018474
ENSMUSG00000018476
ENSMUSG00000018481
ENSMUSG00000018501
ENSMUSG00000018507
ENSMUSG00000018509
ENSMUSG00000018537
ENSMUSG00000018541
ENSMUSG00000018547
ENSMUSG00000018554
ENSMUSG00000018565
ENSMUSG00000018566
ENSMUSG00000018567
ENSMUSG00000018569
ENSMUSG00000018570
ENSMUSG00000018572
ENSMUSG00000018581
ENSMUSG00000018583
ENSMUSG00000018585
ENSMUSG00000018589
ENSMUSG00000018593
ENSMUSG00000018604
ENSMUSG00000018648
ENSMUSG00000018651
ENSMUSG00000018654
ENSMUSG00000018659
ENSMUSG00000018666
ENSMUSG00000018669
ENSMUSG00000018672
ENSMUSG00000018678
ENSMUSG00000018697
ENSMUSG00000018698
ENSMUSG00000018733
ENSMUSG00000018736
ENSMUSG00000018740
ENSMUSG00000018750
ENSMUSG00000018752
ENSMUSG00000018761
ENSMUSG00000018765
ENSMUSG00000018770
ENSMUSG00000018774
ENSMUSG00000018796
ENSMUSG00000018800
ENSMUSG00000018809
ENSMUSG00000018819
ENSMUSG00000018821
ENSMUSG00000018830
ENSMUSG00000018841
ENSMUSG00000018846
ENSMUSG00000018848
ENSMUSG00000018865
ENSMUSG00000018882
ENSMUSG00000018893
ENSMUSG00000018899
ENSMUSG00000018906
ENSMUSG00000018907
ENSMUSG00000018909
ENSMUSG00000018919
ENSMUSG00000018920
ENSMUSG00000018921
ENSMUSG00000018923
ENSMUSG00000018924
ENSMUSG00000018927
ENSMUSG00000018931
ENSMUSG00000018965
ENSMUSG00000018973
ENSMUSG00000018974
ENSMUSG00000018983
ENSMUSG00000018986
ENSMUSG00000019039
ENSMUSG00000019054
ENSMUSG00000019055
ENSMUSG00000019066
ENSMUSG00000019082
ENSMUSG00000019088
ENSMUSG00000019122
ENSMUSG00000019124
ENSMUSG00000019139
ENSMUSG00000019143
ENSMUSG00000019146
ENSMUSG00000019158
ENSMUSG00000019173
ENSMUSG00000019179
ENSMUSG00000019189
ENSMUSG00000019194
ENSMUSG00000019210
ENSMUSG00000019214
ENSMUSG00000019230
ENSMUSG00000019232
ENSMUSG00000019235
ENSMUSG00000019254
ENSMUSG00000019256
ENSMUSG00000019261
ENSMUSG00000019295
ENSMUSG00000019297
ENSMUSG00000019301
ENSMUSG00000019303
ENSMUSG00000019312
ENSMUSG00000019320
ENSMUSG00000019326
ENSMUSG00000019338
ENSMUSG00000019359
ENSMUSG00000019370
ENSMUSG00000019373
ENSMUSG00000019432
ENSMUSG00000019433
ENSMUSG00000019461
ENSMUSG00000019464
ENSMUSG00000019467
ENSMUSG00000019470
ENSMUSG00000019471
ENSMUSG00000019487
ENSMUSG00000019494
ENSMUSG00000019518
ENSMUSG00000019539
ENSMUSG00000019558
ENSMUSG00000019564
ENSMUSG00000019577
ENSMUSG00000019578
ENSMUSG00000019579
ENSMUSG00000019590
ENSMUSG00000019647
ENSMUSG00000019659
ENSMUSG00000019689
ENSMUSG00000019699
ENSMUSG00000019710
ENSMUSG00000019715
ENSMUSG00000019718
ENSMUSG00000019726
ENSMUSG00000019731
ENSMUSG00000019732
ENSMUSG00000019737
ENSMUSG00000019738
ENSMUSG00000019761
ENSMUSG00000019762
ENSMUSG00000019767
ENSMUSG00000019768
ENSMUSG00000019769
ENSMUSG00000019773
ENSMUSG00000019774
ENSMUSG00000019775
ENSMUSG00000019777
ENSMUSG00000019782
ENSMUSG00000019785
ENSMUSG00000019787
ENSMUSG00000019789
ENSMUSG00000019790
ENSMUSG00000019791
ENSMUSG00000019792
ENSMUSG00000019794
ENSMUSG00000019796
ENSMUSG00000019797
ENSMUSG00000019804
ENSMUSG00000019806
ENSMUSG00000019808
ENSMUSG00000019809
ENSMUSG00000019810
ENSMUSG00000019813
ENSMUSG00000019814
ENSMUSG00000019817
ENSMUSG00000019818
ENSMUSG00000019820
ENSMUSG00000019822
ENSMUSG00000019823
ENSMUSG00000019826
ENSMUSG00000019831
ENSMUSG00000019832
ENSMUSG00000019837
ENSMUSG00000019838
ENSMUSG00000019841
ENSMUSG00000019842
ENSMUSG00000019843
ENSMUSG00000019845
ENSMUSG00000019846
ENSMUSG00000019850
ENSMUSG00000019851
ENSMUSG00000019852
ENSMUSG00000019853
ENSMUSG00000019854
ENSMUSG00000019856
ENSMUSG00000019857
ENSMUSG00000019861
ENSMUSG00000019863
ENSMUSG00000019866
ENSMUSG00000019868
ENSMUSG00000019872
ENSMUSG00000019873
ENSMUSG00000019874
ENSMUSG00000019876
ENSMUSG00000019878
ENSMUSG00000019880
ENSMUSG00000019883
ENSMUSG00000019888
ENSMUSG00000019889
ENSMUSG00000019890
ENSMUSG00000019891
ENSMUSG00000019893
ENSMUSG00000019894
ENSMUSG00000019897
ENSMUSG00000019899
ENSMUSG00000019906
ENSMUSG00000019909
ENSMUSG00000019913
ENSMUSG00000019917
ENSMUSG00000019920
ENSMUSG00000019923
ENSMUSG00000019927
ENSMUSG00000019929
ENSMUSG00000019932
ENSMUSG00000019933
ENSMUSG00000019936
ENSMUSG00000019942
ENSMUSG00000019943
ENSMUSG00000019944
ENSMUSG00000019945
ENSMUSG00000019947
ENSMUSG00000019948
ENSMUSG00000019960
ENSMUSG00000019961
ENSMUSG00000019966
ENSMUSG00000019969
ENSMUSG00000019970
ENSMUSG00000019971
ENSMUSG00000019975
ENSMUSG00000019977
ENSMUSG00000019979
ENSMUSG00000019982
ENSMUSG00000019984
ENSMUSG00000019986
ENSMUSG00000019988
ENSMUSG00000019990
ENSMUSG00000019992
ENSMUSG00000019996
ENSMUSG00000020000
ENSMUSG00000020009
ENSMUSG00000020010
ENSMUSG00000020015
ENSMUSG00000020017
ENSMUSG00000020018
ENSMUSG00000020019
ENSMUSG00000020020
ENSMUSG00000020021
ENSMUSG00000020022
ENSMUSG00000020023
ENSMUSG00000020024
ENSMUSG00000020027
ENSMUSG00000020032
ENSMUSG00000020034
ENSMUSG00000020037
ENSMUSG00000020038
ENSMUSG00000020042
ENSMUSG00000020044
ENSMUSG00000020048
ENSMUSG00000020051
ENSMUSG00000020052
ENSMUSG00000020053
ENSMUSG00000020056
ENSMUSG00000020057
ENSMUSG00000020059
ENSMUSG00000020061
ENSMUSG00000020062
ENSMUSG00000020063
ENSMUSG00000020064
ENSMUSG00000020067
ENSMUSG00000020068
ENSMUSG00000020069
ENSMUSG00000020070
ENSMUSG00000020072
ENSMUSG00000020074
ENSMUSG00000020075
ENSMUSG00000020076
ENSMUSG00000020077
ENSMUSG00000020078
ENSMUSG00000020079
ENSMUSG00000020080
ENSMUSG00000020083
ENSMUSG00000020085
ENSMUSG00000020086
ENSMUSG00000020087
ENSMUSG00000020088
ENSMUSG00000020089
ENSMUSG00000020091
ENSMUSG00000020092
ENSMUSG00000020096
ENSMUSG00000020097
ENSMUSG00000020101
ENSMUSG00000020102
ENSMUSG00000020105
ENSMUSG00000020107
ENSMUSG00000020108
ENSMUSG00000020109
ENSMUSG00000020111
ENSMUSG00000020114
ENSMUSG00000020116
ENSMUSG00000020120
ENSMUSG00000020121
ENSMUSG00000020122
ENSMUSG00000020123
ENSMUSG00000020124
ENSMUSG00000020125
ENSMUSG00000020130
ENSMUSG00000020131
ENSMUSG00000020133
ENSMUSG00000020134
ENSMUSG00000020135
ENSMUSG00000020137
ENSMUSG00000020140
ENSMUSG00000020142
ENSMUSG00000020143
ENSMUSG00000020150
ENSMUSG00000020151
ENSMUSG00000020152
ENSMUSG00000020153
ENSMUSG00000020154
ENSMUSG00000020156
ENSMUSG00000020159
ENSMUSG00000020160
ENSMUSG00000020163
ENSMUSG00000020166
ENSMUSG00000020167
ENSMUSG00000020169
ENSMUSG00000020170
ENSMUSG00000020171
ENSMUSG00000020173
ENSMUSG00000020175
ENSMUSG00000020176
ENSMUSG00000020178
ENSMUSG00000020180
ENSMUSG00000020181
ENSMUSG00000020182
ENSMUSG00000020183
ENSMUSG00000020184
ENSMUSG00000020185
ENSMUSG00000020186
ENSMUSG00000020189
ENSMUSG00000020191
ENSMUSG00000020205
ENSMUSG00000020211
ENSMUSG00000020212
ENSMUSG00000020216
ENSMUSG00000020218
ENSMUSG00000020219
ENSMUSG00000020220
ENSMUSG00000020224
ENSMUSG00000020225
ENSMUSG00000020226
ENSMUSG00000020227
ENSMUSG00000020228
ENSMUSG00000020230
ENSMUSG00000020231
ENSMUSG00000020232
ENSMUSG00000020238
ENSMUSG00000020241
ENSMUSG00000020246
ENSMUSG00000020248
ENSMUSG00000020250
ENSMUSG00000020251
ENSMUSG00000020253
ENSMUSG00000020255
ENSMUSG00000020256
ENSMUSG00000020258
ENSMUSG00000020261
ENSMUSG00000020262
ENSMUSG00000020263
ENSMUSG00000020264
ENSMUSG00000020265
ENSMUSG00000020267
ENSMUSG00000020268
ENSMUSG00000020273
ENSMUSG00000020275
ENSMUSG00000020277
ENSMUSG00000020280
ENSMUSG00000020282
ENSMUSG00000020283
ENSMUSG00000020286
ENSMUSG00000020287
ENSMUSG00000020288
ENSMUSG00000020289
ENSMUSG00000020290
ENSMUSG00000020295
ENSMUSG00000020297
ENSMUSG00000020300
ENSMUSG00000020305
ENSMUSG00000020307
ENSMUSG00000020309
ENSMUSG00000020310
ENSMUSG00000020311
ENSMUSG00000020312
ENSMUSG00000020315
ENSMUSG00000020317
ENSMUSG00000020319
ENSMUSG00000020321
ENSMUSG00000020325
ENSMUSG00000020327
ENSMUSG00000020328
ENSMUSG00000020329
ENSMUSG00000020330
ENSMUSG00000020331
ENSMUSG00000020332
ENSMUSG00000020334
ENSMUSG00000020340
ENSMUSG00000020346
ENSMUSG00000020349
ENSMUSG00000020354
ENSMUSG00000020357
ENSMUSG00000020358
ENSMUSG00000020359
ENSMUSG00000020361
ENSMUSG00000020362
ENSMUSG00000020363
ENSMUSG00000020364
ENSMUSG00000020366
ENSMUSG00000020368
ENSMUSG00000020372
ENSMUSG00000020374
ENSMUSG00000020375
ENSMUSG00000020377
ENSMUSG00000020380
ENSMUSG00000020381
ENSMUSG00000020385
ENSMUSG00000020387
ENSMUSG00000020388
ENSMUSG00000020389
ENSMUSG00000020390
ENSMUSG00000020392
ENSMUSG00000020393
ENSMUSG00000020396
ENSMUSG00000020397
ENSMUSG00000020400
ENSMUSG00000020402
ENSMUSG00000020405
ENSMUSG00000020409
ENSMUSG00000020411
ENSMUSG00000020412
ENSMUSG00000020413
ENSMUSG00000020415
ENSMUSG00000020419
ENSMUSG00000020420
ENSMUSG00000020422
ENSMUSG00000020423
ENSMUSG00000020424
ENSMUSG00000020427
ENSMUSG00000020429
ENSMUSG00000020430
ENSMUSG00000020431
ENSMUSG00000020432
ENSMUSG00000020435
ENSMUSG00000020436
ENSMUSG00000020437
ENSMUSG00000020439
ENSMUSG00000020440
ENSMUSG00000020444
ENSMUSG00000020447
ENSMUSG00000020448
ENSMUSG00000020453
ENSMUSG00000020456
ENSMUSG00000020457
ENSMUSG00000020458
ENSMUSG00000020460
ENSMUSG00000020461
ENSMUSG00000020462
ENSMUSG00000020464
ENSMUSG00000020467
ENSMUSG00000020471
ENSMUSG00000020472
ENSMUSG00000020473
ENSMUSG00000020474
ENSMUSG00000020475
ENSMUSG00000020476
ENSMUSG00000020482
ENSMUSG00000020483
ENSMUSG00000020484
ENSMUSG00000020485
ENSMUSG00000020486
ENSMUSG00000020490
ENSMUSG00000020491
ENSMUSG00000020492
ENSMUSG00000020493
ENSMUSG00000020495
ENSMUSG00000020514
ENSMUSG00000020515
ENSMUSG00000020519
ENSMUSG00000020520
ENSMUSG00000020522
ENSMUSG00000020524
ENSMUSG00000020526
ENSMUSG00000020527
ENSMUSG00000020528
ENSMUSG00000020530
ENSMUSG00000020532
ENSMUSG00000020534
ENSMUSG00000020536
ENSMUSG00000020537
ENSMUSG00000020538
ENSMUSG00000020544
ENSMUSG00000020546
ENSMUSG00000020547
ENSMUSG00000020549
ENSMUSG00000020553
ENSMUSG00000020561
ENSMUSG00000020562
ENSMUSG00000020564
ENSMUSG00000020566
ENSMUSG00000020570
ENSMUSG00000020571
ENSMUSG00000020572
ENSMUSG00000020573
ENSMUSG00000020576
ENSMUSG00000020577
ENSMUSG00000020580
ENSMUSG00000020581
[truncated: 12,349 more rows]

## Sheet: Pelodiscus sinensis
ENSPSIG00000000001
ENSPSIG00000000003
ENSPSIG00000000005
ENSPSIG00000000011
ENSPSIG00000000012
ENSPSIG00000000015
ENSPSIG00000000016
ENSPSIG00000000017
ENSPSIG00000000018
ENSPSIG00000000026
ENSPSIG00000000034
ENSPSIG00000000035
ENSPSIG00000000048
ENSPSIG00000000049
ENSPSIG00000000050
ENSPSIG00000000055
ENSPSIG00000000056
ENSPSIG00000000057
ENSPSIG00000000058
ENSPSIG00000000060
ENSPSIG00000000061
ENSPSIG00000000065
ENSPSIG00000000066
ENSPSIG00000000067
ENSPSIG00000000069
ENSPSIG00000000075
ENSPSIG00000000076
ENSPSIG00000000077
ENSPSIG00000000079
ENSPSIG00000000080
ENSPSIG00000000084
ENSPSIG00000000087
ENSPSIG00000000088
ENSPSIG00000000093
ENSPSIG00000000094
ENSPSIG00000000096
ENSPSIG00000000097
ENSPSIG00000000099
ENSPSIG00000000103
ENSPSIG00000000105
ENSPSIG00000000107
ENSPSIG00000000116
ENSPSIG00000000121
ENSPSIG00000000123
ENSPSIG00000000127
ENSPSIG00000000143
ENSPSIG00000000144
ENSPSIG00000000145
ENSPSIG00000000146
ENSPSIG00000000149
ENSPSIG00000000150
ENSPSIG00000000157
ENSPSIG00000000158
ENSPSIG00000000161
ENSPSIG00000000162
ENSPSIG00000000169
ENSPSIG00000000173
ENSPSIG00000000176
ENSPSIG00000000178
ENSPSIG00000000180
ENSPSIG00000000182
ENSPSIG00000000185
ENSPSIG00000000188
ENSPSIG00000000198
ENSPSIG00000000199
ENSPSIG00000000208
ENSPSIG00000000209
ENSPSIG00000000211
ENSPSIG00000000212
ENSPSIG00000000213
ENSPSIG00000000216
ENSPSIG00000000218
ENSPSIG00000000221
ENSPSIG00000000224
ENSPSIG00000000226
ENSPSIG00000000231
ENSPSIG00000000237
ENSPSIG00000000242
ENSPSIG00000000243
ENSPSIG00000000248
ENSPSIG00000000254
ENSPSIG00000000258
ENSPSIG00000000259
ENSPSIG00000000268
ENSPSIG00000000271
ENSPSIG00000000275
ENSPSIG00000000285
ENSPSIG00000000291
ENSPSIG00000000297
ENSPSIG00000000300
ENSPSIG00000000303
ENSPSIG00000000305
ENSPSIG00000000307
ENSPSIG00000000308
ENSPSIG00000000309
ENSPSIG00000000312
ENSPSIG00000000316
ENSPSIG00000000318
ENSPSIG00000000319
ENSPSIG00000000321
ENSPSIG00000000326
ENSPSIG00000000329
ENSPSIG00000000330
ENSPSIG00000000333
ENSPSIG00000000335
ENSPSIG00000000341
ENSPSIG00000000344
ENSPSIG00000000346
ENSPSIG00000000349
ENSPSIG00000000363
ENSPSIG00000000365
ENSPSIG00000000370
ENSPSIG00000000374
ENSPSIG00000000378
ENSPSIG00000000379
ENSPSIG00000000381
ENSPSIG00000000383
ENSPSIG00000000384
ENSPSIG00000000388
ENSPSIG00000000390
ENSPSIG00000000396
ENSPSIG00000000400
ENSPSIG00000000408
ENSPSIG00000000411
ENSPSIG00000000412
ENSPSIG00000000413
ENSPSIG00000000414
ENSPSIG00000000415
ENSPSIG00000000416
ENSPSIG00000000419
ENSPSIG00000000421
ENSPSIG00000000424
ENSPSIG00000000430
ENSPSIG00000000432
ENSPSIG00000000437
ENSPSIG00000000440
ENSPSIG00000000445
ENSPSIG00000000446
ENSPSIG00000000450
ENSPSIG00000000451
ENSPSIG00000000454
ENSPSIG00000000456
ENSPSIG00000000460
ENSPSIG00000000469
ENSPSIG00000000471
ENSPSIG00000000475
ENSPSIG00000000476
ENSPSIG00000000477
ENSPSIG00000000481
ENSPSIG00000000483
ENSPSIG00000000485
ENSPSIG00000000487
ENSPSIG00000000490
ENSPSIG00000000498
ENSPSIG00000000499
ENSPSIG00000000500
ENSPSIG00000000502
ENSPSIG00000000506
ENSPSIG00000000508
ENSPSIG00000000509
ENSPSIG00000000512
ENSPSIG00000000513
ENSPSIG00000000515
ENSPSIG00000000516
ENSPSIG00000000517
ENSPSIG00000000519
ENSPSIG00000000522
ENSPSIG00000000523
ENSPSIG00000000527
ENSPSIG00000000528
ENSPSIG00000000531
ENSPSIG00000000532
ENSPSIG00000000533
ENSPSIG00000000534
ENSPSIG00000000537
ENSPSIG00000000539
ENSPSIG00000000541
ENSPSIG00000000542
ENSPSIG00000000544
ENSPSIG00000000545
ENSPSIG00000000549
ENSPSIG00000000557
ENSPSIG00000000563
ENSPSIG00000000564
ENSPSIG00000000565
ENSPSIG00000000566
ENSPSIG00000000568
ENSPSIG00000000569
ENSPSIG00000000570
ENSPSIG00000000572
ENSPSIG00000000576
ENSPSIG00000000578
ENSPSIG00000000579
ENSPSIG00000000583
ENSPSIG00000000584
ENSPSIG00000000585
ENSPSIG00000000587
ENSPSIG00000000590
ENSPSIG00000000592
ENSPSIG00000000597
ENSPSIG00000000599
ENSPSIG00000000608
ENSPSIG00000000609
ENSPSIG00000000612
ENSPSIG00000000613
ENSPSIG00000000616
ENSPSIG00000000624
ENSPSIG00000000625
ENSPSIG00000000627
ENSPSIG00000000631
ENSPSIG00000000640
ENSPSIG00000000642
ENSPSIG00000000649
ENSPSIG00000000650
ENSPSIG00000000651
ENSPSIG00000000653
ENSPSIG00000000656
ENSPSIG00000000659
ENSPSIG00000000663
ENSPSIG00000000666
ENSPSIG00000000667
ENSPSIG00000000671
ENSPSIG00000000672
ENSPSIG00000000678
ENSPSIG00000000681
ENSPSIG00000000683
ENSPSIG00000000684
ENSPSIG00000000687
ENSPSIG00000000691
ENSPSIG00000000695
ENSPSIG00000000696
ENSPSIG00000000698
ENSPSIG00000000701
ENSPSIG00000000709
ENSPSIG00000000710
ENSPSIG00000000712
ENSPSIG00000000714
ENSPSIG00000000715
ENSPSIG00000000716
ENSPSIG00000000717
ENSPSIG00000000718
ENSPSIG00000000724
ENSPSIG00000000725
ENSPSIG00000000728
ENSPSIG00000000732
ENSPSIG00000000733
ENSPSIG00000000736
ENSPSIG00000000737
ENSPSIG00000000740
ENSPSIG00000000742
ENSPSIG00000000746
ENSPSIG00000000749
ENSPSIG00000000750
ENSPSIG00000000751
ENSPSIG00000000755
ENSPSIG00000000756
ENSPSIG00000000757
ENSPSIG00000000760
ENSPSIG00000000761
ENSPSIG00000000765
ENSPSIG00000000770
ENSPSIG00000000774
ENSPSIG00000000780
ENSPSIG00000000781
ENSPSIG00000000783
ENSPSIG00000000784
ENSPSIG00000000787
ENSPSIG00000000790
ENSPSIG00000000792
ENSPSIG00000000793
ENSPSIG00000000798
ENSPSIG00000000800
ENSPSIG00000000802
ENSPSIG00000000806
ENSPSIG00000000809
ENSPSIG00000000811
ENSPSIG00000000813
ENSPSIG00000000814
ENSPSIG00000000818
ENSPSIG00000000822
ENSPSIG00000000825
ENSPSIG00000000827
ENSPSIG00000000828
ENSPSIG00000000837
ENSPSIG00000000838
ENSPSIG00000000839
ENSPSIG00000000846
ENSPSIG00000000848
ENSPSIG00000000854
ENSPSIG00000000856
ENSPSIG00000000857
ENSPSIG00000000860
ENSPSIG00000000864
ENSPSIG00000000870
ENSPSIG00000000871
ENSPSIG00000000873
ENSPSIG00000000876
ENSPSIG00000000887
ENSPSIG00000000891
ENSPSIG00000000892
ENSPSIG00000000894
ENSPSIG00000000897
ENSPSIG00000000898
ENSPSIG00000000899
ENSPSIG00000000903
ENSPSIG00000000912
ENSPSIG00000000913
ENSPSIG00000000920
ENSPSIG00000000928
ENSPSIG00000000933
ENSPSIG00000000934
ENSPSIG00000000940
ENSPSIG00000000941
ENSPSIG00000000943
ENSPSIG00000000945
ENSPSIG00000000946
ENSPSIG00000000949
ENSPSIG00000000950
ENSPSIG00000000952
ENSPSIG00000000957
ENSPSIG00000000962
ENSPSIG00000000964
ENSPSIG00000000968
ENSPSIG00000000972
ENSPSIG00000000974
ENSPSIG00000000975
ENSPSIG00000000983
ENSPSIG00000000984
ENSPSIG00000000986
ENSPSIG00000000989
ENSPSIG00000000990
ENSPSIG00000000991
ENSPSIG00000000992
ENSPSIG00000000995
ENSPSIG00000000996
ENSPSIG00000001000
ENSPSIG00000001005
ENSPSIG00000001006
ENSPSIG00000001008
ENSPSIG00000001011
ENSPSIG00000001012
ENSPSIG00000001016
ENSPSIG00000001017
ENSPSIG00000001018
ENSPSIG00000001026
ENSPSIG00000001029
ENSPSIG00000001033
ENSPSIG00000001036
ENSPSIG00000001038
ENSPSIG00000001039
ENSPSIG00000001041
ENSPSIG00000001042
ENSPSIG00000001047
ENSPSIG00000001050
ENSPSIG00000001054
ENSPSIG00000001060
ENSPSIG00000001062
ENSPSIG00000001063
ENSPSIG00000001068
ENSPSIG00000001070
ENSPSIG00000001076
ENSPSIG00000001079
ENSPSIG00000001080
ENSPSIG00000001087
ENSPSIG00000001088
ENSPSIG00000001089
ENSPSIG00000001091
ENSPSIG00000001094
ENSPSIG00000001098
ENSPSIG00000001100
ENSPSIG00000001103
ENSPSIG00000001105
ENSPSIG00000001108
ENSPSIG00000001109
ENSPSIG00000001111
ENSPSIG00000001112
ENSPSIG00000001114
ENSPSIG00000001120
ENSPSIG00000001121
ENSPSIG00000001127
ENSPSIG00000001128
ENSPSIG00000001130
ENSPSIG00000001133
ENSPSIG00000001134
ENSPSIG00000001151
ENSPSIG00000001158
ENSPSIG00000001163
ENSPSIG00000001166
ENSPSIG00000001168
ENSPSIG00000001170
ENSPSIG00000001174
ENSPSIG00000001176
ENSPSIG00000001177
ENSPSIG00000001178
ENSPSIG00000001190
ENSPSIG00000001191
ENSPSIG00000001193
ENSPSIG00000001194
ENSPSIG00000001195
ENSPSIG00000001202
ENSPSIG00000001206
ENSPSIG00000001211
ENSPSIG00000001225
ENSPSIG00000001227
ENSPSIG00000001229
ENSPSIG00000001230
ENSPSIG00000001234
ENSPSIG00000001236
ENSPSIG00000001239
ENSPSIG00000001244
ENSPSIG00000001245
ENSPSIG00000001256
ENSPSIG00000001257
ENSPSIG00000001260
ENSPSIG00000001267
ENSPSIG00000001270
ENSPSIG00000001272
ENSPSIG00000001275
ENSPSIG00000001278
ENSPSIG00000001286
ENSPSIG00000001289
ENSPSIG00000001290
ENSPSIG00000001291
ENSPSIG00000001294
ENSPSIG00000001297
ENSPSIG00000001302
ENSPSIG00000001306
ENSPSIG00000001307
ENSPSIG00000001309
ENSPSIG00000001312
ENSPSIG00000001316
ENSPSIG00000001320
ENSPSIG00000001321
ENSPSIG00000001330
ENSPSIG00000001335
ENSPSIG00000001337
ENSPSIG00000001339
ENSPSIG00000001342
ENSPSIG00000001348
ENSPSIG00000001354
ENSPSIG00000001359
ENSPSIG00000001362
ENSPSIG00000001366
ENSPSIG00000001367
ENSPSIG00000001368
ENSPSIG00000001372
ENSPSIG00000001376
ENSPSIG00000001377
ENSPSIG00000001380
ENSPSIG00000001382
ENSPSIG00000001383
ENSPSIG00000001388
ENSPSIG00000001389
ENSPSIG00000001390
ENSPSIG00000001399
ENSPSIG00000001405
ENSPSIG00000001407
ENSPSIG00000001412
ENSPSIG00000001419
ENSPSIG00000001420
ENSPSIG00000001421
ENSPSIG00000001422
ENSPSIG00000001424
ENSPSIG00000001432
ENSPSIG00000001434
ENSPSIG00000001442
ENSPSIG00000001445
ENSPSIG00000001449
ENSPSIG00000001450
ENSPSIG00000001453
ENSPSIG00000001455
ENSPSIG00000001456
ENSPSIG00000001462
ENSPSIG00000001464
ENSPSIG00000001470
ENSPSIG00000001472
ENSPSIG00000001473
ENSPSIG00000001477
ENSPSIG00000001478
ENSPSIG00000001482
ENSPSIG00000001483
ENSPSIG00000001484
ENSPSIG00000001485
ENSPSIG00000001490
ENSPSIG00000001491
ENSPSIG00000001493
ENSPSIG00000001496
ENSPSIG00000001500
ENSPSIG00000001502
ENSPSIG00000001504
ENSPSIG00000001507
ENSPSIG00000001512
ENSPSIG00000001514
ENSPSIG00000001516
ENSPSIG00000001519
ENSPSIG00000001524
ENSPSIG00000001526
ENSPSIG00000001527
ENSPSIG00000001532
ENSPSIG00000001533
ENSPSIG00000001534
ENSPSIG00000001535
ENSPSIG00000001539
ENSPSIG00000001543
ENSPSIG00000001548
ENSPSIG00000001550
ENSPSIG00000001552
ENSPSIG00000001553
ENSPSIG00000001555
ENSPSIG00000001558
ENSPSIG00000001561
ENSPSIG00000001563
ENSPSIG00000001564
ENSPSIG00000001567
ENSPSIG00000001570
ENSPSIG00000001572
ENSPSIG00000001575
ENSPSIG00000001580
ENSPSIG00000001581
ENSPSIG00000001582
ENSPSIG00000001585
ENSPSIG00000001590
ENSPSIG00000001591
ENSPSIG00000001592
ENSPSIG00000001593
ENSPSIG00000001595
ENSPSIG00000001596
ENSPSIG00000001600
ENSPSIG00000001606
ENSPSIG00000001607
ENSPSIG00000001609
ENSPSIG00000001610
ENSPSIG00000001615
ENSPSIG00000001616
ENSPSIG00000001619
ENSPSIG00000001620
ENSPSIG00000001621
ENSPSIG00000001623
ENSPSIG00000001626
ENSPSIG00000001631
ENSPSIG00000001635
ENSPSIG00000001641
ENSPSIG00000001644
ENSPSIG00000001648
ENSPSIG00000001653
ENSPSIG00000001655
ENSPSIG00000001656
ENSPSIG00000001658
ENSPSIG00000001662
ENSPSIG00000001663
ENSPSIG00000001665
ENSPSIG00000001667
ENSPSIG00000001671
ENSPSIG00000001674
ENSPSIG00000001675
ENSPSIG00000001680
ENSPSIG00000001684
ENSPSIG00000001688
ENSPSIG00000001692
ENSPSIG00000001694
ENSPSIG00000001698
ENSPSIG00000001706
ENSPSIG00000001708
ENSPSIG00000001713
ENSPSIG00000001714
ENSPSIG00000001716
ENSPSIG00000001727
ENSPSIG00000001736
ENSPSIG00000001737
ENSPSIG00000001738
ENSPSIG00000001742
ENSPSIG00000001745
ENSPSIG00000001750
ENSPSIG00000001754
ENSPSIG00000001755
ENSPSIG00000001756
ENSPSIG00000001763
ENSPSIG00000001766
ENSPSIG00000001767
ENSPSIG00000001773
ENSPSIG00000001778
ENSPSIG00000001779
ENSPSIG00000001781
ENSPSIG00000001782
ENSPSIG00000001783
ENSPSIG00000001785
ENSPSIG00000001786
ENSPSIG00000001788
ENSPSIG00000001789
ENSPSIG00000001791
ENSPSIG00000001798
ENSPSIG00000001811
ENSPSIG00000001813
ENSPSIG00000001815
ENSPSIG00000001817
ENSPSIG00000001818
ENSPSIG00000001820
ENSPSIG00000001821
ENSPSIG00000001822
ENSPSIG00000001823
ENSPSIG00000001825
ENSPSIG00000001826
ENSPSIG00000001828
ENSPSIG00000001830
ENSPSIG00000001831
ENSPSIG00000001832
ENSPSIG00000001833
ENSPSIG00000001835
ENSPSIG00000001841
ENSPSIG00000001843
ENSPSIG00000001844
ENSPSIG00000001846
ENSPSIG00000001850
ENSPSIG00000001851
ENSPSIG00000001856
ENSPSIG00000001862
ENSPSIG00000001868
ENSPSIG00000001869
ENSPSIG00000001871
ENSPSIG00000001877
ENSPSIG00000001879
ENSPSIG00000001880
ENSPSIG00000001881
ENSPSIG00000001885
ENSPSIG00000001890
ENSPSIG00000001894
ENSPSIG00000001898
ENSPSIG00000001900
ENSPSIG00000001902
ENSPSIG00000001905
ENSPSIG00000001910
ENSPSIG00000001911
ENSPSIG00000001916
ENSPSIG00000001921
ENSPSIG00000001922
ENSPSIG00000001923
ENSPSIG00000001931
ENSPSIG00000001932
ENSPSIG00000001933
ENSPSIG00000001934
ENSPSIG00000001936
ENSPSIG00000001937
ENSPSIG00000001938
ENSPSIG00000001939
ENSPSIG00000001941
ENSPSIG00000001946
ENSPSIG00000001948
ENSPSIG00000001952
ENSPSIG00000001953
ENSPSIG00000001956
ENSPSIG00000001961
ENSPSIG00000001962
ENSPSIG00000001964
ENSPSIG00000001981
ENSPSIG00000001982
ENSPSIG00000001984
ENSPSIG00000001987
ENSPSIG00000001988
ENSPSIG00000001989
ENSPSIG00000001992
ENSPSIG00000001993
ENSPSIG00000001994
ENSPSIG00000002009
ENSPSIG00000002017
ENSPSIG00000002025
ENSPSIG00000002026
ENSPSIG00000002027
ENSPSIG00000002028
ENSPSIG00000002029
ENSPSIG00000002030
ENSPSIG00000002034
ENSPSIG00000002036
ENSPSIG00000002041
ENSPSIG00000002047
ENSPSIG00000002050
ENSPSIG00000002052
ENSPSIG00000002057
ENSPSIG00000002062
ENSPSIG00000002075
ENSPSIG00000002076
ENSPSIG00000002077
ENSPSIG00000002078
ENSPSIG00000002079
ENSPSIG00000002080
ENSPSIG00000002081
ENSPSIG00000002082
ENSPSIG00000002083
ENSPSIG00000002084
ENSPSIG00000002085
ENSPSIG00000002089
ENSPSIG00000002090
ENSPSIG00000002091
ENSPSIG00000002092
ENSPSIG00000002093
ENSPSIG00000002096
ENSPSIG00000002097
ENSPSIG00000002098
ENSPSIG00000002099
ENSPSIG00000002100
ENSPSIG00000002101
ENSPSIG00000002103
ENSPSIG00000002104
ENSPSIG00000002105
ENSPSIG00000002107
ENSPSIG00000002108
ENSPSIG00000002109
ENSPSIG00000002112
ENSPSIG00000002114
ENSPSIG00000002116
ENSPSIG00000002117
ENSPSIG00000002118
ENSPSIG00000002119
ENSPSIG00000002120
ENSPSIG00000002121
ENSPSIG00000002123
ENSPSIG00000002124
ENSPSIG00000002126
ENSPSIG00000002128
ENSPSIG00000002131
ENSPSIG00000002133
ENSPSIG00000002136
ENSPSIG00000002137
ENSPSIG00000002139
ENSPSIG00000002140
ENSPSIG00000002142
ENSPSIG00000002143
ENSPSIG00000002144
ENSPSIG00000002145
ENSPSIG00000002146
ENSPSIG00000002147
ENSPSIG00000002148
ENSPSIG00000002149
ENSPSIG00000002151
ENSPSIG00000002152
ENSPSIG00000002153
ENSPSIG00000002155
ENSPSIG00000002156
ENSPSIG00000002157
ENSPSIG00000002158
ENSPSIG00000002159
ENSPSIG00000002166
ENSPSIG00000002169
ENSPSIG00000002170
ENSPSIG00000002171
ENSPSIG00000002173
ENSPSIG00000002174
ENSPSIG00000002175
ENSPSIG00000002177
ENSPSIG00000002178
ENSPSIG00000002179
ENSPSIG00000002181
ENSPSIG00000002183
ENSPSIG00000002187
ENSPSIG00000002188
ENSPSIG00000002189
ENSPSIG00000002191
ENSPSIG00000002192
ENSPSIG00000002194
ENSPSIG00000002195
ENSPSIG00000002200
ENSPSIG00000002203
ENSPSIG00000002204
ENSPSIG00000002205
ENSPSIG00000002206
ENSPSIG00000002207
ENSPSIG00000002208
ENSPSIG00000002211
ENSPSIG00000002212
ENSPSIG00000002213
ENSPSIG00000002215
ENSPSIG00000002216
ENSPSIG00000002217
ENSPSIG00000002220
ENSPSIG00000002221
ENSPSIG00000002223
ENSPSIG00000002224
ENSPSIG00000002225
ENSPSIG00000002226
ENSPSIG00000002227
ENSPSIG00000002228
ENSPSIG00000002230
ENSPSIG00000002231
ENSPSIG00000002232
ENSPSIG00000002233
ENSPSIG00000002235
ENSPSIG00000002236
ENSPSIG00000002238
ENSPSIG00000002240
ENSPSIG00000002241
ENSPSIG00000002244
ENSPSIG00000002245
ENSPSIG00000002246
ENSPSIG00000002247
ENSPSIG00000002248
ENSPSIG00000002249
ENSPSIG00000002250
ENSPSIG00000002252
ENSPSIG00000002253
ENSPSIG00000002254
ENSPSIG00000002256
ENSPSIG00000002258
ENSPSIG00000002260
ENSPSIG00000002261
ENSPSIG00000002264
ENSPSIG00000002265
ENSPSIG00000002266
ENSPSIG00000002267
ENSPSIG00000002268
ENSPSIG00000002271
ENSPSIG00000002273
ENSPSIG00000002274
ENSPSIG00000002278
ENSPSIG00000002279
ENSPSIG00000002280
ENSPSIG00000002281
ENSPSIG00000002282
ENSPSIG00000002284
ENSPSIG00000002285
ENSPSIG00000002286
ENSPSIG00000002288
ENSPSIG00000002289
ENSPSIG00000002290
ENSPSIG00000002291
ENSPSIG00000002293
ENSPSIG00000002294
ENSPSIG00000002295
ENSPSIG00000002296
ENSPSIG00000002297
ENSPSIG00000002300
ENSPSIG00000002302
ENSPSIG00000002303
ENSPSIG00000002305
ENSPSIG00000002307
ENSPSIG00000002311
ENSPSIG00000002312
ENSPSIG00000002314
ENSPSIG00000002315
ENSPSIG00000002316
ENSPSIG00000002317
ENSPSIG00000002318
ENSPSIG00000002320
ENSPSIG00000002321
ENSPSIG00000002322
ENSPSIG00000002328
ENSPSIG00000002329
ENSPSIG00000002330
ENSPSIG00000002331
ENSPSIG00000002332
ENSPSIG00000002334
ENSPSIG00000002335
ENSPSIG00000002336
ENSPSIG00000002337
ENSPSIG00000002339
ENSPSIG00000002346
ENSPSIG00000002347
ENSPSIG00000002348
ENSPSIG00000002349
ENSPSIG00000002350
ENSPSIG00000002351
ENSPSIG00000002352
ENSPSIG00000002353
ENSPSIG00000002354
ENSPSIG00000002357
ENSPSIG00000002358
ENSPSIG00000002359
ENSPSIG00000002360
ENSPSIG00000002361
ENSPSIG00000002362
ENSPSIG00000002363
ENSPSIG00000002364
ENSPSIG00000002367
ENSPSIG00000002368
ENSPSIG00000002370
ENSPSIG00000002371
ENSPSIG00000002372
ENSPSIG00000002373
ENSPSIG00000002374
ENSPSIG00000002375
ENSPSIG00000002376
ENSPSIG00000002377
ENSPSIG00000002378
ENSPSIG00000002379
ENSPSIG00000002380
ENSPSIG00000002381
ENSPSIG00000002382
ENSPSIG00000002383
ENSPSIG00000002384
ENSPSIG00000002385
ENSPSIG00000002386
ENSPSIG00000002387
ENSPSIG00000002388
ENSPSIG00000002389
ENSPSIG00000002390
ENSPSIG00000002392
ENSPSIG00000002393
ENSPSIG00000002394
ENSPSIG00000002395
ENSPSIG00000002397
ENSPSIG00000002398
ENSPSIG00000002399
ENSPSIG00000002400
ENSPSIG00000002405
ENSPSIG00000002406
ENSPSIG00000002407
ENSPSIG00000002410
ENSPSIG00000002412
ENSPSIG00000002415
ENSPSIG00000002416
ENSPSIG00000002418
ENSPSIG00000002421
ENSPSIG00000002422
ENSPSIG00000002423
ENSPSIG00000002424
ENSPSIG00000002425
ENSPSIG00000002426
ENSPSIG00000002427
ENSPSIG00000002428
ENSPSIG00000002429
ENSPSIG00000002430
ENSPSIG00000002431
ENSPSIG00000002432
ENSPSIG00000002433
ENSPSIG00000002435
ENSPSIG00000002437
ENSPSIG00000002438
ENSPSIG00000002440
ENSPSIG00000002441
ENSPSIG00000002443
ENSPSIG00000002444
ENSPSIG00000002445
ENSPSIG00000002447
ENSPSIG00000002448
ENSPSIG00000002449
ENSPSIG00000002450
ENSPSIG00000002451
ENSPSIG00000002453
ENSPSIG00000002456
ENSPSIG00000002458
ENSPSIG00000002459
ENSPSIG00000002460
ENSPSIG00000002462
ENSPSIG00000002466
ENSPSIG00000002467
ENSPSIG00000002469
ENSPSIG00000002470
ENSPSIG00000002471
ENSPSIG00000002473
ENSPSIG00000002474
ENSPSIG00000002479
ENSPSIG00000002483
ENSPSIG00000002485
ENSPSIG00000002486
ENSPSIG00000002487
ENSPSIG00000002488
ENSPSIG00000002490
ENSPSIG00000002491
ENSPSIG00000002492
ENSPSIG00000002497
ENSPSIG00000002499
ENSPSIG00000002500
ENSPSIG00000002501
ENSPSIG00000002502
ENSPSIG00000002503
ENSPSIG00000002504
ENSPSIG00000002505
ENSPSIG00000002506
ENSPSIG00000002507
ENSPSIG00000002509
ENSPSIG00000002510
ENSPSIG00000002512
ENSPSIG00000002515
ENSPSIG00000002517
ENSPSIG00000002518
ENSPSIG00000002520
ENSPSIG00000002521
ENSPSIG00000002523
ENSPSIG00000002525
ENSPSIG00000002526
ENSPSIG00000002527
ENSPSIG00000002528
ENSPSIG00000002529
ENSPSIG00000002530
ENSPSIG00000002531
ENSPSIG00000002532
ENSPSIG00000002534
ENSPSIG00000002536
ENSPSIG00000002537
ENSPSIG00000002538
ENSPSIG00000002540
ENSPSIG00000002541
ENSPSIG00000002543
ENSPSIG00000002545
ENSPSIG00000002546
ENSPSIG00000002550
ENSPSIG00000002551
ENSPSIG00000002555
ENSPSIG00000002557
ENSPSIG00000002558
ENSPSIG00000002561
ENSPSIG00000002562
ENSPSIG00000002563
ENSPSIG00000002564
ENSPSIG00000002565
ENSPSIG00000002568
ENSPSIG00000002573
ENSPSIG00000002574
ENSPSIG00000002575
ENSPSIG00000002576
ENSPSIG00000002579
ENSPSIG00000002580
ENSPSIG00000002582
ENSPSIG00000002586
ENSPSIG00000002587
ENSPSIG00000002589
ENSPSIG00000002594
ENSPSIG00000002595
ENSPSIG00000002596
ENSPSIG00000002597
ENSPSIG00000002598
ENSPSIG00000002599
ENSPSIG00000002600
ENSPSIG00000002602
ENSPSIG00000002604
ENSPSIG00000002605
ENSPSIG00000002607
ENSPSIG00000002608
ENSPSIG00000002610
ENSPSIG00000002611
ENSPSIG00000002614
ENSPSIG00000002616
ENSPSIG00000002617
ENSPSIG00000002618
ENSPSIG00000002620
ENSPSIG00000002621
ENSPSIG00000002622
ENSPSIG00000002623
ENSPSIG00000002624
ENSPSIG00000002625
ENSPSIG00000002626
ENSPSIG00000002627
ENSPSIG00000002628
ENSPSIG00000002629
ENSPSIG00000002630
ENSPSIG00000002631
ENSPSIG00000002632
ENSPSIG00000002633
ENSPSIG00000002634
ENSPSIG00000002635
ENSPSIG00000002636
ENSPSIG00000002637
ENSPSIG00000002638
ENSPSIG00000002639
ENSPSIG00000002641
ENSPSIG00000002642
ENSPSIG00000002643
ENSPSIG00000002644
ENSPSIG00000002645
ENSPSIG00000002647
ENSPSIG00000002650
ENSPSIG00000002651
ENSPSIG00000002653
ENSPSIG00000002657
ENSPSIG00000002658
ENSPSIG00000002659
ENSPSIG00000002660
ENSPSIG00000002661
ENSPSIG00000002663
ENSPSIG00000002664
ENSPSIG00000002665
ENSPSIG00000002666
ENSPSIG00000002667
ENSPSIG00000002668
ENSPSIG00000002669
ENSPSIG00000002672
ENSPSIG00000002673
ENSPSIG00000002674
ENSPSIG00000002675
ENSPSIG00000002676
ENSPSIG00000002677
ENSPSIG00000002678
ENSPSIG00000002679
ENSPSIG00000002680
ENSPSIG00000002681
ENSPSIG00000002683
ENSPSIG00000002684
ENSPSIG00000002685
ENSPSIG00000002686
ENSPSIG00000002687
ENSPSIG00000002689
ENSPSIG00000002690
ENSPSIG00000002691
ENSPSIG00000002692
ENSPSIG00000002693
ENSPSIG00000002694
ENSPSIG00000002695
ENSPSIG00000002696
ENSPSIG00000002697
ENSPSIG00000002698
ENSPSIG00000002699
ENSPSIG00000002700
ENSPSIG00000002701
ENSPSIG00000002703
ENSPSIG00000002704
ENSPSIG00000002705
ENSPSIG00000002707
ENSPSIG00000002709
ENSPSIG00000002711
ENSPSIG00000002712
ENSPSIG00000002713
ENSPSIG00000002715
ENSPSIG00000002716
ENSPSIG00000002719
ENSPSIG00000002720
ENSPSIG00000002721
ENSPSIG00000002722
ENSPSIG00000002724
ENSPSIG00000002725
ENSPSIG00000002726
ENSPSIG00000002727
ENSPSIG00000002728
ENSPSIG00000002732
ENSPSIG00000002733
ENSPSIG00000002734
ENSPSIG00000002735
ENSPSIG00000002736
ENSPSIG00000002737
ENSPSIG00000002738
ENSPSIG00000002739
ENSPSIG00000002740
ENSPSIG00000002741
ENSPSIG00000002742
ENSPSIG00000002743
ENSPSIG00000002745
ENSPSIG00000002746
ENSPSIG00000002747
ENSPSIG00000002748
ENSPSIG00000002749
ENSPSIG00000002751
ENSPSIG00000002752
ENSPSIG00000002753
ENSPSIG00000002754
ENSPSIG00000002757
ENSPSIG00000002760
ENSPSIG00000002761
ENSPSIG00000002763
ENSPSIG00000002764
ENSPSIG00000002765
ENSPSIG00000002766
ENSPSIG00000002767
ENSPSIG00000002768
ENSPSIG00000002769
ENSPSIG00000002770
ENSPSIG00000002771
ENSPSIG00000002773
ENSPSIG00000002776
ENSPSIG00000002777
ENSPSIG00000002778
ENSPSIG00000002779
ENSPSIG00000002780
ENSPSIG00000002781
ENSPSIG00000002782
ENSPSIG00000002783
ENSPSIG00000002786
ENSPSIG00000002787
ENSPSIG00000002788
ENSPSIG00000002789
ENSPSIG00000002790
ENSPSIG00000002791
ENSPSIG00000002792
ENSPSIG00000002793
ENSPSIG00000002794
ENSPSIG00000002797
ENSPSIG00000002798
ENSPSIG00000002800
ENSPSIG00000002802
ENSPSIG00000002803
ENSPSIG00000002807
ENSPSIG00000002808
ENSPSIG00000002809
ENSPSIG00000002810
ENSPSIG00000002812
ENSPSIG00000002813
ENSPSIG00000002815
ENSPSIG00000002816
ENSPSIG00000002817
ENSPSIG00000002821
ENSPSIG00000002822
ENSPSIG00000002824
ENSPSIG00000002825
ENSPSIG00000002826
ENSPSIG00000002828
ENSPSIG00000002830
ENSPSIG00000002831
ENSPSIG00000002832
ENSPSIG00000002834
ENSPSIG00000002836
ENSPSIG00000002837
ENSPSIG00000002838
ENSPSIG00000002839
ENSPSIG00000002841
ENSPSIG00000002842
ENSPSIG00000002845
ENSPSIG00000002846
ENSPSIG00000002847
ENSPSIG00000002848
ENSPSIG00000002852
ENSPSIG00000002853
ENSPSIG00000002854
ENSPSIG00000002855
ENSPSIG00000002856
ENSPSIG00000002858
ENSPSIG00000002860
ENSPSIG00000002861
ENSPSIG00000002863
ENSPSIG00000002864
ENSPSIG00000002865
ENSPSIG00000002866
ENSPSIG00000002867
ENSPSIG00000002868
ENSPSIG00000002870
ENSPSIG00000002872
ENSPSIG00000002873
ENSPSIG00000002875
ENSPSIG00000002878
ENSPSIG00000002879
ENSPSIG00000002880
ENSPSIG00000002882
ENSPSIG00000002884
ENSPSIG00000002886
ENSPSIG00000002887
ENSPSIG00000002888
ENSPSIG00000002889
ENSPSIG00000002890
ENSPSIG00000002891
ENSPSIG00000002893
ENSPSIG00000002894
ENSPSIG00000002896
ENSPSIG00000002898
ENSPSIG00000002900
ENSPSIG00000002901
ENSPSIG00000002903
ENSPSIG00000002904
ENSPSIG00000002906
ENSPSIG00000002907
ENSPSIG00000002908
ENSPSIG00000002909
ENSPSIG00000002910
ENSPSIG00000002911
ENSPSIG00000002912
ENSPSIG00000002914
ENSPSIG00000002916
ENSPSIG00000002918
ENSPSIG00000002919
ENSPSIG00000002921
ENSPSIG00000002925
ENSPSIG00000002926
ENSPSIG00000002927
ENSPSIG00000002928
ENSPSIG00000002931
ENSPSIG00000002932
ENSPSIG00000002933
ENSPSIG00000002934
ENSPSIG00000002935
ENSPSIG00000002936
ENSPSIG00000002937
ENSPSIG00000002938
ENSPSIG00000002942
ENSPSIG00000002943
ENSPSIG00000002944
ENSPSIG00000002945
ENSPSIG00000002947
ENSPSIG00000002948
ENSPSIG00000002950
ENSPSIG00000002951
ENSPSIG00000002952
ENSPSIG00000002954
ENSPSIG00000002956
ENSPSIG00000002957
ENSPSIG00000002958
ENSPSIG00000002959
ENSPSIG00000002960
ENSPSIG00000002962
ENSPSIG00000002963
ENSPSIG00000002965
ENSPSIG00000002967
ENSPSIG00000002969
ENSPSIG00000002970
ENSPSIG00000002971
ENSPSIG00000002972
ENSPSIG00000002973
ENSPSIG00000002975
ENSPSIG00000002977
ENSPSIG00000002978
ENSPSIG00000002979
ENSPSIG00000002980
ENSPSIG00000002981
ENSPSIG00000002982
ENSPSIG00000002983
ENSPSIG00000002984
ENSPSIG00000002985
ENSPSIG00000002986
ENSPSIG00000002987
ENSPSIG00000002988
ENSPSIG00000002989
ENSPSIG00000002991
ENSPSIG00000002992
ENSPSIG00000002993
ENSPSIG00000002995
ENSPSIG00000002996
ENSPSIG00000002998
ENSPSIG00000002999
ENSPSIG00000003000
ENSPSIG00000003002
ENSPSIG00000003003
ENSPSIG00000003006
ENSPSIG00000003007
ENSPSIG00000003008
ENSPSIG00000003010
ENSPSIG00000003011
ENSPSIG00000003014
ENSPSIG00000003015
ENSPSIG00000003016
ENSPSIG00000003017
ENSPSIG00000003018
ENSPSIG00000003019
ENSPSIG00000003020
ENSPSIG00000003021
ENSPSIG00000003022
ENSPSIG00000003023
ENSPSIG00000003024
ENSPSIG00000003025
ENSPSIG00000003026
ENSPSIG00000003027
ENSPSIG00000003028
ENSPSIG00000003030
ENSPSIG00000003036
ENSPSIG00000003038
ENSPSIG00000003040
ENSPSIG00000003044
ENSPSIG00000003045
ENSPSIG00000003046
ENSPSIG00000003055
ENSPSIG00000003056
ENSPSIG00000003058
ENSPSIG00000003060
ENSPSIG00000003061
ENSPSIG00000003062
ENSPSIG00000003064
ENSPSIG00000003065
ENSPSIG00000003066
ENSPSIG00000003067
ENSPSIG00000003068
ENSPSIG00000003069
ENSPSIG00000003070
ENSPSIG00000003071
ENSPSIG00000003072
ENSPSIG00000003073
ENSPSIG00000003074
ENSPSIG00000003075
ENSPSIG00000003077
ENSPSIG00000003078
ENSPSIG00000003079
ENSPSIG00000003080
ENSPSIG00000003081
ENSPSIG00000003085
ENSPSIG00000003086
ENSPSIG00000003088
ENSPSIG00000003089
ENSPSIG00000003091
ENSPSIG00000003092
ENSPSIG00000003095
ENSPSIG00000003096
ENSPSIG00000003097
ENSPSIG00000003098
ENSPSIG00000003099
ENSPSIG00000003100
ENSPSIG00000003102
ENSPSIG00000003104
ENSPSIG00000003105
ENSPSIG00000003106
ENSPSIG00000003107
ENSPSIG00000003109
ENSPSIG00000003110
ENSPSIG00000003112
ENSPSIG00000003113
ENSPSIG00000003117
ENSPSIG00000003118
ENSPSIG00000003119
ENSPSIG00000003120
ENSPSIG00000003121
ENSPSIG00000003122
ENSPSIG00000003123
ENSPSIG00000003126
ENSPSIG00000003127
ENSPSIG00000003128
ENSPSIG00000003129
ENSPSIG00000003130
ENSPSIG00000003131
ENSPSIG00000003132
ENSPSIG00000003134
ENSPSIG00000003136
ENSPSIG00000003138
ENSPSIG00000003139
ENSPSIG00000003140
ENSPSIG00000003141
ENSPSIG00000003146
ENSPSIG00000003147
ENSPSIG00000003148
ENSPSIG00000003150
ENSPSIG00000003151
ENSPSIG00000003152
ENSPSIG00000003153
ENSPSIG00000003154
ENSPSIG00000003155
ENSPSIG00000003156
ENSPSIG00000003157
ENSPSIG00000003158
ENSPSIG00000003159
ENSPSIG00000003160
ENSPSIG00000003161
ENSPSIG00000003162
ENSPSIG00000003163
ENSPSIG00000003164
ENSPSIG00000003165
ENSPSIG00000003166
ENSPSIG00000003167
ENSPSIG00000003168
ENSPSIG00000003171
ENSPSIG00000003172
ENSPSIG00000003173
ENSPSIG00000003175
ENSPSIG00000003176
ENSPSIG00000003177
ENSPSIG00000003178
ENSPSIG00000003180
ENSPSIG00000003181
ENSPSIG00000003183
ENSPSIG00000003186
ENSPSIG00000003187
ENSPSIG00000003188
ENSPSIG00000003189
ENSPSIG00000003191
ENSPSIG00000003192
ENSPSIG00000003193
ENSPSIG00000003195
ENSPSIG00000003196
ENSPSIG00000003197
ENSPSIG00000003198
ENSPSIG00000003199
ENSPSIG00000003200
ENSPSIG00000003202
ENSPSIG00000003204
ENSPSIG00000003206
ENSPSIG00000003207
ENSPSIG00000003209
ENSPSIG00000003211
ENSPSIG00000003212
ENSPSIG00000003213
ENSPSIG00000003214
ENSPSIG00000003215
ENSPSIG00000003216
ENSPSIG00000003217
ENSPSIG00000003218
ENSPSIG00000003220
ENSPSIG00000003221
ENSPSIG00000003222
ENSPSIG00000003223
ENSPSIG00000003225
ENSPSIG00000003226
ENSPSIG00000003227
ENSPSIG00000003229
ENSPSIG00000003231
ENSPSIG00000003233
ENSPSIG00000003234
ENSPSIG00000003235
ENSPSIG00000003236
ENSPSIG00000003238
ENSPSIG00000003240
ENSPSIG00000003241
ENSPSIG00000003243
ENSPSIG00000003245
ENSPSIG00000003246
ENSPSIG00000003247
ENSPSIG00000003248
ENSPSIG00000003249
ENSPSIG00000003253
ENSPSIG00000003257
ENSPSIG00000003258
ENSPSIG00000003259
ENSPSIG00000003260
ENSPSIG00000003261
ENSPSIG00000003262
ENSPSIG00000003265
ENSPSIG00000003266
ENSPSIG00000003267
ENSPSIG00000003268
ENSPSIG00000003269
ENSPSIG00000003270
ENSPSIG00000003271
ENSPSIG00000003272
ENSPSIG00000003274
ENSPSIG00000003275
ENSPSIG00000003276
ENSPSIG00000003277
ENSPSIG00000003279
ENSPSIG00000003280
ENSPSIG00000003281
ENSPSIG00000003282
ENSPSIG00000003283
ENSPSIG00000003284
ENSPSIG00000003285
ENSPSIG00000003286
ENSPSIG00000003287
ENSPSIG00000003288
ENSPSIG00000003289
ENSPSIG00000003290
ENSPSIG00000003291
ENSPSIG00000003292
ENSPSIG00000003293
ENSPSIG00000003294
ENSPSIG00000003295
ENSPSIG00000003296
ENSPSIG00000003298
ENSPSIG00000003299
ENSPSIG00000003301
ENSPSIG00000003302
ENSPSIG00000003303
ENSPSIG00000003305
ENSPSIG00000003307
ENSPSIG00000003308
ENSPSIG00000003310
ENSPSIG00000003311
ENSPSIG00000003313
ENSPSIG00000003314
ENSPSIG00000003315
ENSPSIG00000003316
ENSPSIG00000003317
ENSPSIG00000003320
ENSPSIG00000003321
ENSPSIG00000003322
ENSPSIG00000003323
ENSPSIG00000003325
ENSPSIG00000003326
ENSPSIG00000003327
ENSPSIG00000003328
ENSPSIG00000003329
ENSPSIG00000003330
ENSPSIG00000003331
ENSPSIG00000003332
ENSPSIG00000003333
ENSPSIG00000003334
ENSPSIG00000003335
ENSPSIG00000003337
ENSPSIG00000003339
ENSPSIG00000003340
ENSPSIG00000003341
ENSPSIG00000003342
ENSPSIG00000003343
ENSPSIG00000003344
ENSPSIG00000003345
ENSPSIG00000003346
ENSPSIG00000003348
ENSPSIG00000003349
ENSPSIG00000003350
ENSPSIG00000003351
ENSPSIG00000003352
ENSPSIG00000003353
ENSPSIG00000003354
ENSPSIG00000003355
ENSPSIG00000003357
ENSPSIG00000003358
ENSPSIG00000003361
ENSPSIG00000003362
ENSPSIG00000003363
ENSPSIG00000003364
ENSPSIG00000003365
ENSPSIG00000003366
ENSPSIG00000003368
ENSPSIG00000003369
ENSPSIG00000003370
ENSPSIG00000003371
ENSPSIG00000003373
ENSPSIG00000003374
ENSPSIG00000003375
ENSPSIG00000003377
ENSPSIG00000003381
ENSPSIG00000003383
ENSPSIG00000003384
ENSPSIG00000003385
ENSPSIG00000003387
ENSPSIG00000003388
ENSPSIG00000003389
ENSPSIG00000003391
ENSPSIG00000003392
ENSPSIG00000003393
ENSPSIG00000003394
ENSPSIG00000003395
ENSPSIG00000003397
ENSPSIG00000003398
ENSPSIG00000003401
ENSPSIG00000003403
ENSPSIG00000003405
ENSPSIG00000003408
ENSPSIG00000003409
ENSPSIG00000003412
ENSPSIG00000003414
ENSPSIG00000003415
ENSPSIG00000003416
ENSPSIG00000003418
ENSPSIG00000003419
ENSPSIG00000003421
ENSPSIG00000003422
ENSPSIG00000003423
ENSPSIG00000003425
ENSPSIG00000003426
ENSPSIG00000003427
ENSPSIG00000003429
ENSPSIG00000003430
ENSPSIG00000003431
ENSPSIG00000003433
ENSPSIG00000003435
ENSPSIG00000003436
ENSPSIG00000003437
ENSPSIG00000003438
ENSPSIG00000003440
ENSPSIG00000003444
ENSPSIG00000003445
ENSPSIG00000003449
ENSPSIG00000003450
ENSPSIG00000003451
ENSPSIG00000003452
ENSPSIG00000003453
ENSPSIG00000003456
ENSPSIG00000003457
ENSPSIG00000003459
ENSPSIG00000003462
ENSPSIG00000003463
ENSPSIG00000003466
ENSPSIG00000003468
ENSPSIG00000003469
ENSPSIG00000003470
ENSPSIG00000003471
ENSPSIG00000003472
ENSPSIG00000003473
ENSPSIG00000003475
ENSPSIG00000003476
ENSPSIG00000003477
ENSPSIG00000003478
ENSPSIG00000003480
ENSPSIG00000003481
ENSPSIG00000003482
ENSPSIG00000003483
ENSPSIG00000003484
ENSPSIG00000003485
ENSPSIG00000003488
ENSPSIG00000003489
ENSPSIG00000003491
ENSPSIG00000003492
ENSPSIG00000003493
ENSPSIG00000003495
ENSPSIG00000003496
ENSPSIG00000003497
ENSPSIG00000003498
ENSPSIG00000003500
ENSPSIG00000003502
ENSPSIG00000003504
ENSPSIG00000003505
ENSPSIG00000003506
ENSPSIG00000003507
ENSPSIG00000003508
ENSPSIG00000003509
ENSPSIG00000003510
ENSPSIG00000003512
ENSPSIG00000003513
ENSPSIG00000003514
ENSPSIG00000003516
ENSPSIG00000003518
ENSPSIG00000003519
ENSPSIG00000003520
ENSPSIG00000003521
ENSPSIG00000003522
ENSPSIG00000003523
ENSPSIG00000003524
ENSPSIG00000003525
ENSPSIG00000003527
ENSPSIG00000003528
ENSPSIG00000003529
ENSPSIG00000003530
ENSPSIG00000003531
ENSPSIG00000003532
ENSPSIG00000003533
ENSPSIG00000003534
ENSPSIG00000003535
ENSPSIG00000003536
ENSPSIG00000003537
ENSPSIG00000003538
ENSPSIG00000003539
ENSPSIG00000003541
ENSPSIG00000003542
ENSPSIG00000003543
ENSPSIG00000003544
ENSPSIG00000003545
ENSPSIG00000003546
ENSPSIG00000003547
ENSPSIG00000003548
ENSPSIG00000003549
ENSPSIG00000003551
ENSPSIG00000003552
ENSPSIG00000003553
ENSPSIG00000003554
ENSPSIG00000003555
ENSPSIG00000003558
ENSPSIG00000003559
ENSPSIG00000003561
ENSPSIG00000003562
ENSPSIG00000003563
ENSPSIG00000003565
ENSPSIG00000003567
ENSPSIG00000003568
ENSPSIG00000003570
ENSPSIG00000003572
ENSPSIG00000003573
ENSPSIG00000003574
ENSPSIG00000003575
ENSPSIG00000003576
ENSPSIG00000003577
ENSPSIG00000003578
ENSPSIG00000003579
ENSPSIG00000003580
ENSPSIG00000003581
ENSPSIG00000003582
ENSPSIG00000003584
ENSPSIG00000003585
ENSPSIG00000003586
ENSPSIG00000003588
ENSPSIG00000003590
ENSPSIG00000003591
ENSPSIG00000003592
ENSPSIG00000003593
ENSPSIG00000003594
ENSPSIG00000003595
ENSPSIG00000003596
ENSPSIG00000003597
ENSPSIG00000003598
ENSPSIG00000003599
ENSPSIG00000003600
ENSPSIG00000003601
ENSPSIG00000003602
ENSPSIG00000003603
ENSPSIG00000003604
ENSPSIG00000003605
ENSPSIG00000003607
ENSPSIG00000003608
ENSPSIG00000003609
ENSPSIG00000003610
ENSPSIG00000003611
ENSPSIG00000003613
ENSPSIG00000003614
ENSPSIG00000003615
ENSPSIG00000003616
ENSPSIG00000003619
ENSPSIG00000003620
ENSPSIG00000003623
ENSPSIG00000003624
ENSPSIG00000003626
ENSPSIG00000003627
ENSPSIG00000003628
ENSPSIG00000003629
ENSPSIG00000003630
ENSPSIG00000003632
ENSPSIG00000003633
ENSPSIG00000003634
ENSPSIG00000003635
ENSPSIG00000003636
ENSPSIG00000003637
ENSPSIG00000003638
ENSPSIG00000003639
ENSPSIG00000003640
ENSPSIG00000003641
ENSPSIG00000003642
ENSPSIG00000003644
ENSPSIG00000003645
ENSPSIG00000003646
ENSPSIG00000003647
ENSPSIG00000003648
ENSPSIG00000003649
ENSPSIG00000003650
ENSPSIG00000003651
ENSPSIG00000003652
ENSPSIG00000003653
ENSPSIG00000003654
ENSPSIG00000003655
ENSPSIG00000003656
ENSPSIG00000003657
ENSPSIG00000003658
ENSPSIG00000003661
ENSPSIG00000003665
ENSPSIG00000003668
ENSPSIG00000003669
ENSPSIG00000003670
ENSPSIG00000003671
ENSPSIG00000003672
ENSPSIG00000003673
ENSPSIG00000003674
ENSPSIG00000003675
ENSPSIG00000003676
ENSPSIG00000003677
ENSPSIG00000003678
ENSPSIG00000003679
ENSPSIG00000003681
ENSPSIG00000003682
ENSPSIG00000003683
ENSPSIG00000003684
ENSPSIG00000003685
ENSPSIG00000003686
ENSPSIG00000003688
ENSPSIG00000003690
ENSPSIG00000003691
ENSPSIG00000003692
ENSPSIG00000003693
ENSPSIG00000003695
ENSPSIG00000003696
ENSPSIG00000003698
ENSPSIG00000003699
ENSPSIG00000003700
ENSPSIG00000003702
ENSPSIG00000003703
ENSPSIG00000003704
ENSPSIG00000003705
ENSPSIG00000003706
ENSPSIG00000003707
ENSPSIG00000003708
ENSPSIG00000003709
ENSPSIG00000003710
ENSPSIG00000003711
ENSPSIG00000003712
ENSPSIG00000003713
ENSPSIG00000003715
ENSPSIG00000003717
ENSPSIG00000003718
ENSPSIG00000003719
ENSPSIG00000003720
ENSPSIG00000003722
ENSPSIG00000003723
ENSPSIG00000003724
ENSPSIG00000003725
ENSPSIG00000003726
ENSPSIG00000003727
ENSPSIG00000003728
ENSPSIG00000003729
ENSPSIG00000003730
ENSPSIG00000003731
ENSPSIG00000003733
ENSPSIG00000003734
ENSPSIG00000003735
ENSPSIG00000003736
ENSPSIG00000003737
ENSPSIG00000003738
ENSPSIG00000003739
ENSPSIG00000003741
ENSPSIG00000003742
ENSPSIG00000003743
ENSPSIG00000003745
ENSPSIG00000003746
ENSPSIG00000003747
ENSPSIG00000003749
ENSPSIG00000003750
ENSPSIG00000003752
ENSPSIG00000003754
ENSPSIG00000003755
ENSPSIG00000003756
ENSPSIG00000003757
ENSPSIG00000003758
ENSPSIG00000003759
ENSPSIG00000003760
ENSPSIG00000003763
ENSPSIG00000003764
ENSPSIG00000003765
ENSPSIG00000003768
ENSPSIG00000003771
ENSPSIG00000003772
ENSPSIG00000003773
ENSPSIG00000003774
ENSPSIG00000003775
ENSPSIG00000003778
ENSPSIG00000003781
ENSPSIG00000003782
ENSPSIG00000003785
ENSPSIG00000003786
ENSPSIG00000003787
ENSPSIG00000003788
ENSPSIG00000003789
ENSPSIG00000003790
ENSPSIG00000003791
ENSPSIG00000003792
ENSPSIG00000003793
ENSPSIG00000003795
ENSPSIG00000003796
ENSPSIG00000003797
ENSPSIG00000003799
ENSPSIG00000003801
ENSPSIG00000003802
ENSPSIG00000003803
ENSPSIG00000003805
ENSPSIG00000003806
ENSPSIG00000003807
ENSPSIG00000003809
ENSPSIG00000003813
ENSPSIG00000003815
ENSPSIG00000003816
ENSPSIG00000003817
ENSPSIG00000003818
ENSPSIG00000003819
ENSPSIG00000003821
ENSPSIG00000003822
ENSPSIG00000003823
ENSPSIG00000003825
ENSPSIG00000003826
ENSPSIG00000003828
ENSPSIG00000003830
ENSPSIG00000003831
ENSPSIG00000003832
ENSPSIG00000003833
ENSPSIG00000003834
ENSPSIG00000003835
ENSPSIG00000003837
ENSPSIG00000003838
ENSPSIG00000003842
ENSPSIG00000003843
ENSPSIG00000003845
ENSPSIG00000003846
ENSPSIG00000003847
ENSPSIG00000003848
ENSPSIG00000003849
ENSPSIG00000003850
ENSPSIG00000003851
ENSPSIG00000003853
ENSPSIG00000003855
ENSPSIG00000003856
ENSPSIG00000003857
ENSPSIG00000003858
ENSPSIG00000003859
ENSPSIG00000003860
ENSPSIG00000003861
ENSPSIG00000003863
ENSPSIG00000003864
ENSPSIG00000003865
ENSPSIG00000003868
ENSPSIG00000003869
ENSPSIG00000003870
ENSPSIG00000003872
ENSPSIG00000003873
ENSPSIG00000003874
ENSPSIG00000003875
ENSPSIG00000003876
ENSPSIG00000003879
ENSPSIG00000003881
ENSPSIG00000003883
ENSPSIG00000003884
ENSPSIG00000003887
ENSPSIG00000003888
ENSPSIG00000003890
ENSPSIG00000003894
ENSPSIG00000003895
ENSPSIG00000003896
ENSPSIG00000003897
ENSPSIG00000003898
ENSPSIG00000003899
ENSPSIG00000003902
ENSPSIG00000003903
ENSPSIG00000003906
ENSPSIG00000003907
ENSPSIG00000003908
ENSPSIG00000003909
ENSPSIG00000003911
ENSPSIG00000003913
ENSPSIG00000003914
ENSPSIG00000003916
ENSPSIG00000003917
ENSPSIG00000003919
ENSPSIG00000003920
ENSPSIG00000003921
ENSPSIG00000003922
ENSPSIG00000003924
ENSPSIG00000003925
ENSPSIG00000003926
ENSPSIG00000003927
ENSPSIG00000003928
ENSPSIG00000003929
ENSPSIG00000003930
ENSPSIG00000003933
ENSPSIG00000003934
ENSPSIG00000003935
ENSPSIG00000003936
ENSPSIG00000003937
ENSPSIG00000003938
ENSPSIG00000003939
ENSPSIG00000003940
ENSPSIG00000003942
ENSPSIG00000003943
[truncated: 10,155 more rows]

## Sheet: Gallus gallus
ENSGALG00000000003
ENSGALG00000000004
ENSGALG00000000011
ENSGALG00000000013
ENSGALG00000000017
ENSGALG00000000019
ENSGALG00000000033
ENSGALG00000000040
ENSGALG00000000041
ENSGALG00000000044
ENSGALG00000000049
ENSGALG00000000054
ENSGALG00000000055
ENSGALG00000000059
ENSGALG00000000062
ENSGALG00000000065
ENSGALG00000000071
ENSGALG00000000075
ENSGALG00000000076
ENSGALG00000000080
ENSGALG00000000085
ENSGALG00000000086
ENSGALG00000000091
ENSGALG00000000094
ENSGALG00000000098
ENSGALG00000000099
ENSGALG00000000102
ENSGALG00000000106
ENSGALG00000000107
ENSGALG00000000112
ENSGALG00000000113
ENSGALG00000000117
ENSGALG00000000119
ENSGALG00000000120
ENSGALG00000000132
ENSGALG00000000137
ENSGALG00000000139
ENSGALG00000000141
ENSGALG00000000142
ENSGALG00000000146
ENSGALG00000000151
ENSGALG00000000154
ENSGALG00000000156
ENSGALG00000000158
ENSGALG00000000161
ENSGALG00000000162
ENSGALG00000000164
ENSGALG00000000166
ENSGALG00000000168
ENSGALG00000000169
ENSGALG00000000171
ENSGALG00000000172
ENSGALG00000000177
ENSGALG00000000178
ENSGALG00000000181
ENSGALG00000000182
ENSGALG00000000184
ENSGALG00000000195
ENSGALG00000000196
ENSGALG00000000201
ENSGALG00000000206
ENSGALG00000000208
ENSGALG00000000209
ENSGALG00000000215
ENSGALG00000000218
ENSGALG00000000220
ENSGALG00000000221
ENSGALG00000000223
ENSGALG00000000225
ENSGALG00000000226
ENSGALG00000000227
ENSGALG00000000230
ENSGALG00000000231
ENSGALG00000000233
ENSGALG00000000235
ENSGALG00000000238
ENSGALG00000000242
ENSGALG00000000243
ENSGALG00000000244
ENSGALG00000000247
ENSGALG00000000255
ENSGALG00000000258
ENSGALG00000000259
ENSGALG00000000264
ENSGALG00000000270
ENSGALG00000000272
ENSGALG00000000273
ENSGALG00000000276
ENSGALG00000000280
ENSGALG00000000284
ENSGALG00000000291
ENSGALG00000000293
ENSGALG00000000296
ENSGALG00000000299
ENSGALG00000000300
ENSGALG00000000302
ENSGALG00000000304
ENSGALG00000000305
ENSGALG00000000307
ENSGALG00000000309
ENSGALG00000000311
ENSGALG00000000312
ENSGALG00000000313
ENSGALG00000000314
ENSGALG00000000317
ENSGALG00000000318
ENSGALG00000000327
ENSGALG00000000329
ENSGALG00000000332
ENSGALG00000000336
ENSGALG00000000337
ENSGALG00000000341
ENSGALG00000000346
ENSGALG00000000349
ENSGALG00000000352
ENSGALG00000000353
ENSGALG00000000356
ENSGALG00000000360
ENSGALG00000000362
ENSGALG00000000363
ENSGALG00000000364
ENSGALG00000000365
ENSGALG00000000366
ENSGALG00000000367
ENSGALG00000000368
ENSGALG00000000372
ENSGALG00000000374
ENSGALG00000000377
ENSGALG00000000385
ENSGALG00000000388
ENSGALG00000000390
ENSGALG00000000394
ENSGALG00000000395
ENSGALG00000000396
ENSGALG00000000397
ENSGALG00000000399
ENSGALG00000000400
ENSGALG00000000401
ENSGALG00000000402
ENSGALG00000000404
ENSGALG00000000408
ENSGALG00000000410
ENSGALG00000000412
ENSGALG00000000417
ENSGALG00000000419
ENSGALG00000000421
ENSGALG00000000427
ENSGALG00000000428
ENSGALG00000000430
ENSGALG00000000437
ENSGALG00000000438
ENSGALG00000000439
ENSGALG00000000441
ENSGALG00000000442
ENSGALG00000000446
ENSGALG00000000449
ENSGALG00000000453
ENSGALG00000000454
ENSGALG00000000458
ENSGALG00000000461
ENSGALG00000000463
ENSGALG00000000464
ENSGALG00000000468
ENSGALG00000000469
ENSGALG00000000470
ENSGALG00000000474
ENSGALG00000000476
ENSGALG00000000478
ENSGALG00000000483
ENSGALG00000000484
ENSGALG00000000489
ENSGALG00000000490
ENSGALG00000000497
ENSGALG00000000505
ENSGALG00000000508
ENSGALG00000000509
ENSGALG00000000510
ENSGALG00000000511
ENSGALG00000000513
ENSGALG00000000514
ENSGALG00000000516
ENSGALG00000000518
ENSGALG00000000521
ENSGALG00000000523
ENSGALG00000000525
ENSGALG00000000528
ENSGALG00000000529
ENSGALG00000000530
ENSGALG00000000533
ENSGALG00000000535
ENSGALG00000000538
ENSGALG00000000543
ENSGALG00000000546
ENSGALG00000000547
ENSGALG00000000548
ENSGALG00000000550
ENSGALG00000000551
ENSGALG00000000557
ENSGALG00000000560
ENSGALG00000000562
ENSGALG00000000564
ENSGALG00000000569
ENSGALG00000000573
ENSGALG00000000576
ENSGALG00000000577
ENSGALG00000000581
ENSGALG00000000583
ENSGALG00000000584
ENSGALG00000000585
ENSGALG00000000596
ENSGALG00000000597
ENSGALG00000000599
ENSGALG00000000603
ENSGALG00000000606
ENSGALG00000000607
ENSGALG00000000608
ENSGALG00000000610
ENSGALG00000000613
ENSGALG00000000615
ENSGALG00000000616
ENSGALG00000000618
ENSGALG00000000619
ENSGALG00000000620
ENSGALG00000000621
ENSGALG00000000623
ENSGALG00000000624
ENSGALG00000000625
ENSGALG00000000627
ENSGALG00000000629
ENSGALG00000000632
ENSGALG00000000634
ENSGALG00000000636
ENSGALG00000000637
ENSGALG00000000638
ENSGALG00000000650
ENSGALG00000000652
ENSGALG00000000657
ENSGALG00000000660
ENSGALG00000000667
ENSGALG00000000668
ENSGALG00000000670
ENSGALG00000000671
ENSGALG00000000672
ENSGALG00000000673
ENSGALG00000000674
ENSGALG00000000675
ENSGALG00000000678
ENSGALG00000000680
ENSGALG00000000681
ENSGALG00000000684
ENSGALG00000000685
ENSGALG00000000687
ENSGALG00000000690
ENSGALG00000000692
ENSGALG00000000693
ENSGALG00000000695
ENSGALG00000000699
ENSGALG00000000701
ENSGALG00000000703
ENSGALG00000000707
ENSGALG00000000708
ENSGALG00000000710
ENSGALG00000000712
ENSGALG00000000713
ENSGALG00000000719
ENSGALG00000000720
ENSGALG00000000723
ENSGALG00000000724
ENSGALG00000000725
ENSGALG00000000726
ENSGALG00000000729
ENSGALG00000000730
ENSGALG00000000734
ENSGALG00000000737
ENSGALG00000000739
ENSGALG00000000740
ENSGALG00000000742
ENSGALG00000000745
ENSGALG00000000747
ENSGALG00000000748
ENSGALG00000000750
ENSGALG00000000753
ENSGALG00000000761
ENSGALG00000000764
ENSGALG00000000766
ENSGALG00000000769
ENSGALG00000000771
ENSGALG00000000775
ENSGALG00000000776
ENSGALG00000000777
ENSGALG00000000779
ENSGALG00000000780
ENSGALG00000000781
ENSGALG00000000783
ENSGALG00000000784
ENSGALG00000000787
ENSGALG00000000789
ENSGALG00000000790
ENSGALG00000000791
ENSGALG00000000794
ENSGALG00000000800
ENSGALG00000000802
ENSGALG00000000804
ENSGALG00000000806
ENSGALG00000000810
ENSGALG00000000811
ENSGALG00000000812
ENSGALG00000000814
ENSGALG00000000816
ENSGALG00000000817
ENSGALG00000000818
ENSGALG00000000819
ENSGALG00000000820
ENSGALG00000000823
ENSGALG00000000826
ENSGALG00000000830
ENSGALG00000000833
ENSGALG00000000835
ENSGALG00000000838
ENSGALG00000000839
ENSGALG00000000840
ENSGALG00000000843
ENSGALG00000000845
ENSGALG00000000846
ENSGALG00000000847
ENSGALG00000000848
ENSGALG00000000853
ENSGALG00000000855
ENSGALG00000000856
ENSGALG00000000857
ENSGALG00000000860
ENSGALG00000000862
ENSGALG00000000863
ENSGALG00000000864
ENSGALG00000000866
ENSGALG00000000869
ENSGALG00000000874
ENSGALG00000000878
ENSGALG00000000880
ENSGALG00000000881
ENSGALG00000000883
ENSGALG00000000884
ENSGALG00000000886
ENSGALG00000000887
ENSGALG00000000889
ENSGALG00000000890
ENSGALG00000000891
ENSGALG00000000893
ENSGALG00000000894
ENSGALG00000000895
ENSGALG00000000897
ENSGALG00000000898
ENSGALG00000000899
ENSGALG00000000902
ENSGALG00000000903
ENSGALG00000000904
ENSGALG00000000905
ENSGALG00000000907
ENSGALG00000000908
ENSGALG00000000915
ENSGALG00000000918
ENSGALG00000000920
ENSGALG00000000921
ENSGALG00000000927
ENSGALG00000000934
ENSGALG00000000935
ENSGALG00000000936
ENSGALG00000000939
ENSGALG00000000940
ENSGALG00000000944
ENSGALG00000000947
ENSGALG00000000949
ENSGALG00000000950
ENSGALG00000000953
ENSGALG00000000954
ENSGALG00000000955
ENSGALG00000000957
ENSGALG00000000959
ENSGALG00000000962
ENSGALG00000000966
ENSGALG00000000970
ENSGALG00000000972
ENSGALG00000000975
ENSGALG00000000977
ENSGALG00000000978
ENSGALG00000000980
ENSGALG00000000981
ENSGALG00000000982
ENSGALG00000000984
ENSGALG00000000988
ENSGALG00000000990
ENSGALG00000000991
ENSGALG00000000993
ENSGALG00000000994
ENSGALG00000000996
ENSGALG00000000997
ENSGALG00000000998
ENSGALG00000000999
ENSGALG00000001000
ENSGALG00000001001
ENSGALG00000001003
ENSGALG00000001005
ENSGALG00000001006
ENSGALG00000001007
ENSGALG00000001009
ENSGALG00000001013
ENSGALG00000001014
ENSGALG00000001018
ENSGALG00000001020
ENSGALG00000001021
ENSGALG00000001022
ENSGALG00000001023
ENSGALG00000001026
ENSGALG00000001028
ENSGALG00000001030
ENSGALG00000001032
ENSGALG00000001034
ENSGALG00000001035
ENSGALG00000001036
ENSGALG00000001037
ENSGALG00000001038
ENSGALG00000001043
ENSGALG00000001046
ENSGALG00000001048
ENSGALG00000001049
ENSGALG00000001051
ENSGALG00000001053
ENSGALG00000001054
ENSGALG00000001058
ENSGALG00000001062
ENSGALG00000001063
ENSGALG00000001064
ENSGALG00000001067
ENSGALG00000001071
ENSGALG00000001073
ENSGALG00000001077
ENSGALG00000001079
ENSGALG00000001082
ENSGALG00000001085
ENSGALG00000001091
ENSGALG00000001093
ENSGALG00000001094
ENSGALG00000001096
ENSGALG00000001097
ENSGALG00000001099
ENSGALG00000001100
ENSGALG00000001101
ENSGALG00000001103
ENSGALG00000001104
ENSGALG00000001107
ENSGALG00000001108
ENSGALG00000001110
ENSGALG00000001113
ENSGALG00000001115
ENSGALG00000001117
ENSGALG00000001118
ENSGALG00000001121
ENSGALG00000001122
ENSGALG00000001124
ENSGALG00000001126
ENSGALG00000001130
ENSGALG00000001132
ENSGALG00000001136
ENSGALG00000001138
ENSGALG00000001141
ENSGALG00000001143
ENSGALG00000001144
ENSGALG00000001146
ENSGALG00000001150
ENSGALG00000001153
ENSGALG00000001157
ENSGALG00000001158
ENSGALG00000001161
ENSGALG00000001162
ENSGALG00000001163
ENSGALG00000001168
ENSGALG00000001169
ENSGALG00000001171
ENSGALG00000001174
ENSGALG00000001175
ENSGALG00000001177
ENSGALG00000001179
ENSGALG00000001181
ENSGALG00000001182
ENSGALG00000001183
ENSGALG00000001186
ENSGALG00000001187
ENSGALG00000001188
ENSGALG00000001190
ENSGALG00000001191
ENSGALG00000001192
ENSGALG00000001194
ENSGALG00000001197
ENSGALG00000001201
ENSGALG00000001203
ENSGALG00000001204
ENSGALG00000001206
ENSGALG00000001207
ENSGALG00000001208
ENSGALG00000001209
ENSGALG00000001212
ENSGALG00000001213
ENSGALG00000001217
ENSGALG00000001219
ENSGALG00000001220
ENSGALG00000001223
ENSGALG00000001225
ENSGALG00000001226
ENSGALG00000001229
ENSGALG00000001231
ENSGALG00000001233
ENSGALG00000001236
ENSGALG00000001238
ENSGALG00000001239
ENSGALG00000001242
ENSGALG00000001245
ENSGALG00000001246
ENSGALG00000001250
ENSGALG00000001252
ENSGALG00000001253
ENSGALG00000001258
ENSGALG00000001262
ENSGALG00000001263
ENSGALG00000001267
ENSGALG00000001270
ENSGALG00000001275
ENSGALG00000001276
ENSGALG00000001277
ENSGALG00000001278
ENSGALG00000001279
ENSGALG00000001281
ENSGALG00000001282
ENSGALG00000001283
ENSGALG00000001285
ENSGALG00000001289
ENSGALG00000001291
ENSGALG00000001293
ENSGALG00000001295
ENSGALG00000001298
ENSGALG00000001299
ENSGALG00000001301
ENSGALG00000001302
ENSGALG00000001304
ENSGALG00000001306
ENSGALG00000001309
ENSGALG00000001310
ENSGALG00000001312
ENSGALG00000001313
ENSGALG00000001314
ENSGALG00000001315
ENSGALG00000001318
ENSGALG00000001319
ENSGALG00000001320
ENSGALG00000001325
ENSGALG00000001328
ENSGALG00000001329
ENSGALG00000001331
ENSGALG00000001332
ENSGALG00000001333
ENSGALG00000001334
ENSGALG00000001335
ENSGALG00000001337
ENSGALG00000001341
ENSGALG00000001342
ENSGALG00000001343
ENSGALG00000001346
ENSGALG00000001347
ENSGALG00000001350
ENSGALG00000001352
ENSGALG00000001355
ENSGALG00000001359
ENSGALG00000001363
ENSGALG00000001364
ENSGALG00000001370
ENSGALG00000001374
ENSGALG00000001375
ENSGALG00000001376
ENSGALG00000001377
ENSGALG00000001381
ENSGALG00000001382
ENSGALG00000001383
ENSGALG00000001387
ENSGALG00000001389
ENSGALG00000001392
ENSGALG00000001396
ENSGALG00000001398
ENSGALG00000001399
ENSGALG00000001403
ENSGALG00000001404
ENSGALG00000001405
ENSGALG00000001407
ENSGALG00000001411
ENSGALG00000001412
ENSGALG00000001415
ENSGALG00000001416
ENSGALG00000001419
ENSGALG00000001420
ENSGALG00000001422
ENSGALG00000001428
ENSGALG00000001429
ENSGALG00000001434
ENSGALG00000001436
ENSGALG00000001437
ENSGALG00000001438
ENSGALG00000001439
ENSGALG00000001441
ENSGALG00000001443
ENSGALG00000001444
ENSGALG00000001445
ENSGALG00000001446
ENSGALG00000001450
ENSGALG00000001452
ENSGALG00000001455
ENSGALG00000001459
ENSGALG00000001463
ENSGALG00000001470
ENSGALG00000001473
ENSGALG00000001475
ENSGALG00000001476
ENSGALG00000001479
ENSGALG00000001480
ENSGALG00000001483
ENSGALG00000001485
ENSGALG00000001487
ENSGALG00000001491
ENSGALG00000001492
ENSGALG00000001493
ENSGALG00000001494
ENSGALG00000001501
ENSGALG00000001502
ENSGALG00000001503
ENSGALG00000001504
ENSGALG00000001505
ENSGALG00000001506
ENSGALG00000001512
ENSGALG00000001513
ENSGALG00000001515
ENSGALG00000001516
ENSGALG00000001518
ENSGALG00000001519
ENSGALG00000001521
ENSGALG00000001525
ENSGALG00000001527
ENSGALG00000001529
ENSGALG00000001532
ENSGALG00000001535
ENSGALG00000001536
ENSGALG00000001538
ENSGALG00000001540
ENSGALG00000001542
ENSGALG00000001543
ENSGALG00000001544
ENSGALG00000001545
ENSGALG00000001546
ENSGALG00000001547
ENSGALG00000001550
ENSGALG00000001554
ENSGALG00000001555
ENSGALG00000001557
ENSGALG00000001561
ENSGALG00000001563
ENSGALG00000001564
ENSGALG00000001565
ENSGALG00000001567
ENSGALG00000001568
ENSGALG00000001574
ENSGALG00000001576
ENSGALG00000001577
ENSGALG00000001580
ENSGALG00000001586
ENSGALG00000001587
ENSGALG00000001590
ENSGALG00000001593
ENSGALG00000001596
ENSGALG00000001597
ENSGALG00000001600
ENSGALG00000001602
ENSGALG00000001603
ENSGALG00000001604
ENSGALG00000001606
ENSGALG00000001607
ENSGALG00000001608
ENSGALG00000001610
ENSGALG00000001611
ENSGALG00000001612
ENSGALG00000001613
ENSGALG00000001614
ENSGALG00000001616
ENSGALG00000001617
ENSGALG00000001618
ENSGALG00000001619
ENSGALG00000001620
ENSGALG00000001624
ENSGALG00000001626
ENSGALG00000001627
ENSGALG00000001629
ENSGALG00000001630
ENSGALG00000001632
ENSGALG00000001633
ENSGALG00000001634
ENSGALG00000001636
ENSGALG00000001637
ENSGALG00000001639
ENSGALG00000001640
ENSGALG00000001642
ENSGALG00000001644
ENSGALG00000001647
ENSGALG00000001649
ENSGALG00000001651
ENSGALG00000001652
ENSGALG00000001653
ENSGALG00000001654
ENSGALG00000001655
ENSGALG00000001656
ENSGALG00000001662
ENSGALG00000001663
ENSGALG00000001666
ENSGALG00000001668
ENSGALG00000001672
ENSGALG00000001677
ENSGALG00000001678
ENSGALG00000001684
ENSGALG00000001688
ENSGALG00000001689
ENSGALG00000001690
ENSGALG00000001691
ENSGALG00000001692
ENSGALG00000001697
ENSGALG00000001698
ENSGALG00000001700
ENSGALG00000001701
ENSGALG00000001706
ENSGALG00000001708
ENSGALG00000001709
ENSGALG00000001712
ENSGALG00000001713
ENSGALG00000001717
ENSGALG00000001718
ENSGALG00000001719
ENSGALG00000001722
ENSGALG00000001725
ENSGALG00000001726
ENSGALG00000001727
ENSGALG00000001729
ENSGALG00000001730
ENSGALG00000001731
ENSGALG00000001732
ENSGALG00000001733
ENSGALG00000001735
ENSGALG00000001737
ENSGALG00000001740
ENSGALG00000001741
ENSGALG00000001744
ENSGALG00000001749
ENSGALG00000001750
ENSGALG00000001754
ENSGALG00000001756
ENSGALG00000001758
ENSGALG00000001759
ENSGALG00000001761
ENSGALG00000001763
ENSGALG00000001764
ENSGALG00000001768
ENSGALG00000001770
ENSGALG00000001772
ENSGALG00000001774
ENSGALG00000001775
ENSGALG00000001777
ENSGALG00000001779
ENSGALG00000001780
ENSGALG00000001782
ENSGALG00000001786
ENSGALG00000001788
ENSGALG00000001789
ENSGALG00000001790
ENSGALG00000001792
ENSGALG00000001793
ENSGALG00000001795
ENSGALG00000001797
ENSGALG00000001798
ENSGALG00000001799
ENSGALG00000001800
ENSGALG00000001801
ENSGALG00000001802
ENSGALG00000001803
ENSGALG00000001805
ENSGALG00000001807
ENSGALG00000001808
ENSGALG00000001809
ENSGALG00000001811
ENSGALG00000001812
ENSGALG00000001813
ENSGALG00000001816
ENSGALG00000001817
ENSGALG00000001823
ENSGALG00000001824
ENSGALG00000001826
ENSGALG00000001827
ENSGALG00000001828
ENSGALG00000001830
ENSGALG00000001832
ENSGALG00000001833
ENSGALG00000001836
ENSGALG00000001837
ENSGALG00000001838
ENSGALG00000001843
ENSGALG00000001844
ENSGALG00000001845
ENSGALG00000001846
ENSGALG00000001847
ENSGALG00000001848
ENSGALG00000001849
ENSGALG00000001850
ENSGALG00000001852
ENSGALG00000001854
ENSGALG00000001856
ENSGALG00000001857
ENSGALG00000001859
ENSGALG00000001860
ENSGALG00000001861
ENSGALG00000001862
ENSGALG00000001864
ENSGALG00000001869
ENSGALG00000001870
ENSGALG00000001872
ENSGALG00000001874
ENSGALG00000001876
ENSGALG00000001879
ENSGALG00000001880
ENSGALG00000001881
ENSGALG00000001883
ENSGALG00000001884
ENSGALG00000001885
ENSGALG00000001886
ENSGALG00000001889
ENSGALG00000001892
ENSGALG00000001896
ENSGALG00000001900
ENSGALG00000001903
ENSGALG00000001905
ENSGALG00000001907
ENSGALG00000001910
ENSGALG00000001915
ENSGALG00000001916
ENSGALG00000001918
ENSGALG00000001919
ENSGALG00000001925
ENSGALG00000001926
ENSGALG00000001932
ENSGALG00000001933
ENSGALG00000001937
ENSGALG00000001938
ENSGALG00000001939
ENSGALG00000001942
ENSGALG00000001943
ENSGALG00000001944
ENSGALG00000001945
ENSGALG00000001946
ENSGALG00000001947
ENSGALG00000001948
ENSGALG00000001949
ENSGALG00000001950
ENSGALG00000001954
ENSGALG00000001956
ENSGALG00000001957
ENSGALG00000001959
ENSGALG00000001962
ENSGALG00000001963
ENSGALG00000001964
ENSGALG00000001965
ENSGALG00000001966
ENSGALG00000001967
ENSGALG00000001968
ENSGALG00000001969
ENSGALG00000001971
ENSGALG00000001972
ENSGALG00000001973
ENSGALG00000001975
ENSGALG00000001976
ENSGALG00000001977
ENSGALG00000001978
ENSGALG00000001981
ENSGALG00000001983
ENSGALG00000001986
ENSGALG00000001988
ENSGALG00000001992
ENSGALG00000001998
ENSGALG00000002000
ENSGALG00000002001
ENSGALG00000002002
ENSGALG00000002003
ENSGALG00000002005
ENSGALG00000002007
ENSGALG00000002008
ENSGALG00000002009
ENSGALG00000002010
ENSGALG00000002012
ENSGALG00000002013
ENSGALG00000002014
ENSGALG00000002015
ENSGALG00000002016
ENSGALG00000002018
ENSGALG00000002022
ENSGALG00000002023
ENSGALG00000002024
ENSGALG00000002028
ENSGALG00000002029
ENSGALG00000002030
ENSGALG00000002038
ENSGALG00000002040
ENSGALG00000002042
ENSGALG00000002043
ENSGALG00000002045
ENSGALG00000002046
ENSGALG00000002050
ENSGALG00000002053
ENSGALG00000002054
ENSGALG00000002055
ENSGALG00000002057
ENSGALG00000002060
ENSGALG00000002062
ENSGALG00000002064
ENSGALG00000002066
ENSGALG00000002069
ENSGALG00000002070
ENSGALG00000002076
ENSGALG00000002078
ENSGALG00000002081
ENSGALG00000002082
ENSGALG00000002084
ENSGALG00000002085
ENSGALG00000002086
ENSGALG00000002087
ENSGALG00000002090
ENSGALG00000002091
ENSGALG00000002093
ENSGALG00000002094
ENSGALG00000002097
ENSGALG00000002098
ENSGALG00000002099
ENSGALG00000002103
ENSGALG00000002106
ENSGALG00000002107
ENSGALG00000002108
ENSGALG00000002110
ENSGALG00000002111
ENSGALG00000002116
ENSGALG00000002117
ENSGALG00000002118
ENSGALG00000002119
ENSGALG00000002121
ENSGALG00000002123
ENSGALG00000002124
ENSGALG00000002125
ENSGALG00000002129
ENSGALG00000002130
ENSGALG00000002134
ENSGALG00000002136
ENSGALG00000002137
ENSGALG00000002138
ENSGALG00000002139
ENSGALG00000002140
ENSGALG00000002141
ENSGALG00000002143
ENSGALG00000002144
ENSGALG00000002145
ENSGALG00000002147
ENSGALG00000002150
ENSGALG00000002151
ENSGALG00000002155
ENSGALG00000002158
ENSGALG00000002159
ENSGALG00000002160
ENSGALG00000002164
ENSGALG00000002165
ENSGALG00000002167
ENSGALG00000002169
ENSGALG00000002170
ENSGALG00000002172
ENSGALG00000002175
ENSGALG00000002179
ENSGALG00000002180
ENSGALG00000002183
ENSGALG00000002186
ENSGALG00000002187
ENSGALG00000002191
ENSGALG00000002193
ENSGALG00000002194
ENSGALG00000002197
ENSGALG00000002199
ENSGALG00000002200
ENSGALG00000002201
ENSGALG00000002204
ENSGALG00000002212
ENSGALG00000002216
ENSGALG00000002219
ENSGALG00000002221
ENSGALG00000002222
ENSGALG00000002223
ENSGALG00000002225
ENSGALG00000002227
ENSGALG00000002229
ENSGALG00000002235
ENSGALG00000002237
ENSGALG00000002239
ENSGALG00000002240
ENSGALG00000002242
ENSGALG00000002244
ENSGALG00000002247
ENSGALG00000002248
ENSGALG00000002249
ENSGALG00000002253
ENSGALG00000002260
ENSGALG00000002262
ENSGALG00000002263
ENSGALG00000002266
ENSGALG00000002267
ENSGALG00000002268
ENSGALG00000002272
ENSGALG00000002273
ENSGALG00000002277
ENSGALG00000002280
ENSGALG00000002282
ENSGALG00000002283
ENSGALG00000002284
ENSGALG00000002285
ENSGALG00000002287
ENSGALG00000002288
ENSGALG00000002294
ENSGALG00000002298
ENSGALG00000002301
ENSGALG00000002302
ENSGALG00000002305
ENSGALG00000002310
ENSGALG00000002311
ENSGALG00000002312
ENSGALG00000002313
ENSGALG00000002315
ENSGALG00000002316
ENSGALG00000002318
ENSGALG00000002321
ENSGALG00000002325
ENSGALG00000002326
ENSGALG00000002327
ENSGALG00000002335
ENSGALG00000002336
ENSGALG00000002338
ENSGALG00000002342
ENSGALG00000002346
ENSGALG00000002347
ENSGALG00000002348
ENSGALG00000002349
ENSGALG00000002352
ENSGALG00000002353
ENSGALG00000002354
ENSGALG00000002355
ENSGALG00000002356
ENSGALG00000002358
ENSGALG00000002363
ENSGALG00000002364
ENSGALG00000002367
ENSGALG00000002369
ENSGALG00000002371
ENSGALG00000002372
ENSGALG00000002374
ENSGALG00000002375
ENSGALG00000002377
ENSGALG00000002379
ENSGALG00000002384
ENSGALG00000002386
ENSGALG00000002389
ENSGALG00000002392
ENSGALG00000002398
ENSGALG00000002399
ENSGALG00000002402
ENSGALG00000002403
ENSGALG00000002408
ENSGALG00000002412
ENSGALG00000002413
ENSGALG00000002414
ENSGALG00000002417
ENSGALG00000002420
ENSGALG00000002421
ENSGALG00000002424
ENSGALG00000002426
ENSGALG00000002427
ENSGALG00000002430
ENSGALG00000002431
ENSGALG00000002433
ENSGALG00000002439
ENSGALG00000002443
ENSGALG00000002445
ENSGALG00000002447
ENSGALG00000002448
ENSGALG00000002451
ENSGALG00000002452
ENSGALG00000002453
ENSGALG00000002455
ENSGALG00000002457
ENSGALG00000002458
ENSGALG00000002460
ENSGALG00000002462
ENSGALG00000002466
ENSGALG00000002467
ENSGALG00000002469
ENSGALG00000002470
ENSGALG00000002471
ENSGALG00000002473
ENSGALG00000002477
ENSGALG00000002478
ENSGALG00000002479
ENSGALG00000002480
ENSGALG00000002484
ENSGALG00000002487
ENSGALG00000002488
ENSGALG00000002489
ENSGALG00000002490
ENSGALG00000002492
ENSGALG00000002493
ENSGALG00000002495
ENSGALG00000002497
ENSGALG00000002499
ENSGALG00000002501
ENSGALG00000002503
ENSGALG00000002504
ENSGALG00000002505
ENSGALG00000002506
ENSGALG00000002507
ENSGALG00000002509
ENSGALG00000002514
ENSGALG00000002515
ENSGALG00000002519
ENSGALG00000002521
ENSGALG00000002522
ENSGALG00000002524
ENSGALG00000002525
ENSGALG00000002526
ENSGALG00000002527
ENSGALG00000002529
ENSGALG00000002531
ENSGALG00000002532
ENSGALG00000002536
ENSGALG00000002539
ENSGALG00000002540
ENSGALG00000002542
ENSGALG00000002543
ENSGALG00000002544
ENSGALG00000002546
ENSGALG00000002548
ENSGALG00000002552
ENSGALG00000002553
ENSGALG00000002554
ENSGALG00000002555
ENSGALG00000002556
ENSGALG00000002557
ENSGALG00000002558
ENSGALG00000002559
ENSGALG00000002561
ENSGALG00000002562
ENSGALG00000002563
ENSGALG00000002564
ENSGALG00000002569
ENSGALG00000002570
ENSGALG00000002574
ENSGALG00000002576
ENSGALG00000002577
ENSGALG00000002578
ENSGALG00000002579
ENSGALG00000002583
ENSGALG00000002585
ENSGALG00000002587
ENSGALG00000002590
ENSGALG00000002591
ENSGALG00000002594
ENSGALG00000002598
ENSGALG00000002599
ENSGALG00000002602
ENSGALG00000002604
ENSGALG00000002606
ENSGALG00000002610
ENSGALG00000002612
ENSGALG00000002615
ENSGALG00000002616
ENSGALG00000002618
ENSGALG00000002621
ENSGALG00000002623
ENSGALG00000002624
ENSGALG00000002626
ENSGALG00000002629
ENSGALG00000002631
ENSGALG00000002632
ENSGALG00000002634
ENSGALG00000002637
ENSGALG00000002639
ENSGALG00000002644
ENSGALG00000002645
ENSGALG00000002646
ENSGALG00000002647
ENSGALG00000002649
ENSGALG00000002651
ENSGALG00000002652
ENSGALG00000002653
ENSGALG00000002655
ENSGALG00000002656
ENSGALG00000002658
ENSGALG00000002659
ENSGALG00000002661
ENSGALG00000002663
ENSGALG00000002664
ENSGALG00000002665
ENSGALG00000002667
ENSGALG00000002670
ENSGALG00000002671
ENSGALG00000002673
ENSGALG00000002675
ENSGALG00000002677
ENSGALG00000002678
ENSGALG00000002679
ENSGALG00000002682
ENSGALG00000002683
ENSGALG00000002686
ENSGALG00000002688
ENSGALG00000002689
ENSGALG00000002690
ENSGALG00000002692
ENSGALG00000002695
ENSGALG00000002697
ENSGALG00000002701
ENSGALG00000002702
ENSGALG00000002703
ENSGALG00000002704
ENSGALG00000002705
ENSGALG00000002706
ENSGALG00000002707
ENSGALG00000002708
ENSGALG00000002709
ENSGALG00000002710
ENSGALG00000002712
ENSGALG00000002714
ENSGALG00000002715
ENSGALG00000002716
ENSGALG00000002719
ENSGALG00000002720
ENSGALG00000002722
ENSGALG00000002723
ENSGALG00000002725
ENSGALG00000002726
ENSGALG00000002729
ENSGALG00000002732
ENSGALG00000002734
ENSGALG00000002735
ENSGALG00000002739
ENSGALG00000002740
ENSGALG00000002742
ENSGALG00000002744
ENSGALG00000002746
ENSGALG00000002747
ENSGALG00000002749
ENSGALG00000002750
ENSGALG00000002755
ENSGALG00000002759
ENSGALG00000002761
ENSGALG00000002762
ENSGALG00000002764
ENSGALG00000002769
ENSGALG00000002771
ENSGALG00000002773
ENSGALG00000002775
ENSGALG00000002778
ENSGALG00000002781
ENSGALG00000002783
ENSGALG00000002787
ENSGALG00000002789
ENSGALG00000002790
ENSGALG00000002792
ENSGALG00000002796
ENSGALG00000002797
ENSGALG00000002798
ENSGALG00000002800
ENSGALG00000002802
ENSGALG00000002803
ENSGALG00000002804
ENSGALG00000002805
ENSGALG00000002810
ENSGALG00000002816
ENSGALG00000002818
ENSGALG00000002820
ENSGALG00000002823
ENSGALG00000002827
ENSGALG00000002829
ENSGALG00000002830
ENSGALG00000002831
ENSGALG00000002832
ENSGALG00000002835
ENSGALG00000002836
ENSGALG00000002839
ENSGALG00000002841
ENSGALG00000002843
ENSGALG00000002845
ENSGALG00000002846
ENSGALG00000002847
ENSGALG00000002849
ENSGALG00000002850
ENSGALG00000002853
ENSGALG00000002854
ENSGALG00000002855
ENSGALG00000002856
ENSGALG00000002859
ENSGALG00000002861
ENSGALG00000002862
ENSGALG00000002863
ENSGALG00000002864
ENSGALG00000002869
ENSGALG00000002871
ENSGALG00000002872
ENSGALG00000002873
ENSGALG00000002874
ENSGALG00000002877
ENSGALG00000002878
ENSGALG00000002880
ENSGALG00000002883
ENSGALG00000002886
ENSGALG00000002888
ENSGALG00000002889
ENSGALG00000002891
ENSGALG00000002892
ENSGALG00000002894
ENSGALG00000002896
ENSGALG00000002897
ENSGALG00000002898
ENSGALG00000002899
ENSGALG00000002900
ENSGALG00000002903
ENSGALG00000002906
ENSGALG00000002907
ENSGALG00000002908
ENSGALG00000002909
ENSGALG00000002910
ENSGALG00000002911
ENSGALG00000002913
ENSGALG00000002922
ENSGALG00000002923
ENSGALG00000002926
ENSGALG00000002928
ENSGALG00000002929
ENSGALG00000002931
ENSGALG00000002932
ENSGALG00000002937
ENSGALG00000002940
ENSGALG00000002941
ENSGALG00000002942
ENSGALG00000002943
ENSGALG00000002945
ENSGALG00000002946
ENSGALG00000002948
ENSGALG00000002954
ENSGALG00000002955
ENSGALG00000002957
ENSGALG00000002958
ENSGALG00000002959
ENSGALG00000002960
ENSGALG00000002963
ENSGALG00000002964
ENSGALG00000002967
ENSGALG00000002969
ENSGALG00000002971
ENSGALG00000002974
ENSGALG00000002980
ENSGALG00000002981
ENSGALG00000002984
ENSGALG00000002985
ENSGALG00000002986
ENSGALG00000002989
ENSGALG00000002990
ENSGALG00000002991
ENSGALG00000002993
ENSGALG00000003000
ENSGALG00000003003
ENSGALG00000003005
ENSGALG00000003010
ENSGALG00000003014
ENSGALG00000003015
ENSGALG00000003019
ENSGALG00000003024
ENSGALG00000003026
ENSGALG00000003028
ENSGALG00000003029
ENSGALG00000003030
ENSGALG00000003031
ENSGALG00000003033
ENSGALG00000003034
ENSGALG00000003035
ENSGALG00000003039
ENSGALG00000003042
ENSGALG00000003045
ENSGALG00000003046
ENSGALG00000003047
ENSGALG00000003048
ENSGALG00000003049
ENSGALG00000003052
ENSGALG00000003053
ENSGALG00000003064
ENSGALG00000003065
ENSGALG00000003066
ENSGALG00000003067
ENSGALG00000003068
ENSGALG00000003071
ENSGALG00000003072
ENSGALG00000003073
ENSGALG00000003074
ENSGALG00000003078
ENSGALG00000003079
ENSGALG00000003082
ENSGALG00000003084
ENSGALG00000003085
ENSGALG00000003086
ENSGALG00000003087
ENSGALG00000003091
ENSGALG00000003092
ENSGALG00000003097
ENSGALG00000003099
ENSGALG00000003103
ENSGALG00000003107
ENSGALG00000003108
ENSGALG00000003109
ENSGALG00000003110
ENSGALG00000003113
ENSGALG00000003118
ENSGALG00000003122
ENSGALG00000003123
ENSGALG00000003126
ENSGALG00000003128
ENSGALG00000003129
ENSGALG00000003130
ENSGALG00000003131
ENSGALG00000003135
ENSGALG00000003137
ENSGALG00000003141
ENSGALG00000003143
ENSGALG00000003144
ENSGALG00000003146
ENSGALG00000003147
ENSGALG00000003149
ENSGALG00000003150
ENSGALG00000003153
ENSGALG00000003157
ENSGALG00000003158
ENSGALG00000003161
ENSGALG00000003162
ENSGALG00000003163
ENSGALG00000003164
ENSGALG00000003166
ENSGALG00000003168
ENSGALG00000003169
ENSGALG00000003171
ENSGALG00000003172
ENSGALG00000003177
ENSGALG00000003180
ENSGALG00000003181
ENSGALG00000003183
ENSGALG00000003185
ENSGALG00000003187
ENSGALG00000003189
ENSGALG00000003193
ENSGALG00000003194
ENSGALG00000003195
ENSGALG00000003196
ENSGALG00000003199
ENSGALG00000003200
ENSGALG00000003201
ENSGALG00000003203
ENSGALG00000003204
ENSGALG00000003205
ENSGALG00000003206
ENSGALG00000003208
ENSGALG00000003209
ENSGALG00000003210
ENSGALG00000003211
ENSGALG00000003213
ENSGALG00000003217
ENSGALG00000003219
ENSGALG00000003220
ENSGALG00000003221
ENSGALG00000003226
ENSGALG00000003227
ENSGALG00000003231
ENSGALG00000003233
ENSGALG00000003235
ENSGALG00000003238
ENSGALG00000003239
ENSGALG00000003241
ENSGALG00000003243
ENSGALG00000003245
ENSGALG00000003246
ENSGALG00000003247
ENSGALG00000003248
ENSGALG00000003249
ENSGALG00000003250
ENSGALG00000003251
ENSGALG00000003253
ENSGALG00000003254
ENSGALG00000003256
ENSGALG00000003258
ENSGALG00000003259
ENSGALG00000003260
ENSGALG00000003261
ENSGALG00000003264
ENSGALG00000003265
ENSGALG00000003267
ENSGALG00000003268
ENSGALG00000003270
ENSGALG00000003272
ENSGALG00000003273
ENSGALG00000003277
ENSGALG00000003281
ENSGALG00000003282
ENSGALG00000003283
ENSGALG00000003284
ENSGALG00000003285
ENSGALG00000003286
ENSGALG00000003287
ENSGALG00000003288
ENSGALG00000003289
ENSGALG00000003290
ENSGALG00000003294
ENSGALG00000003295
ENSGALG00000003297
ENSGALG00000003299
ENSGALG00000003301
ENSGALG00000003303
ENSGALG00000003307
ENSGALG00000003308
ENSGALG00000003310
ENSGALG00000003313
ENSGALG00000003314
ENSGALG00000003316
ENSGALG00000003318
ENSGALG00000003322
ENSGALG00000003324
ENSGALG00000003326
ENSGALG00000003331
ENSGALG00000003333
ENSGALG00000003336
ENSGALG00000003337
ENSGALG00000003339
ENSGALG00000003340
ENSGALG00000003344
ENSGALG00000003345
ENSGALG00000003349
ENSGALG00000003353
ENSGALG00000003355
ENSGALG00000003356
ENSGALG00000003357
ENSGALG00000003358
ENSGALG00000003359
ENSGALG00000003360
ENSGALG00000003365
ENSGALG00000003368
ENSGALG00000003369
ENSGALG00000003370
ENSGALG00000003373
ENSGALG00000003374
ENSGALG00000003375
ENSGALG00000003377
ENSGALG00000003378
ENSGALG00000003379
ENSGALG00000003381
ENSGALG00000003383
ENSGALG00000003385
ENSGALG00000003386
ENSGALG00000003389
ENSGALG00000003391
ENSGALG00000003392
ENSGALG00000003396
ENSGALG00000003400
ENSGALG00000003401
ENSGALG00000003405
ENSGALG00000003407
ENSGALG00000003408
ENSGALG00000003409
ENSGALG00000003410
ENSGALG00000003412
ENSGALG00000003415
ENSGALG00000003419
ENSGALG00000003420
ENSGALG00000003424
ENSGALG00000003426
ENSGALG00000003427
ENSGALG00000003428
ENSGALG00000003429
ENSGALG00000003430
ENSGALG00000003434
ENSGALG00000003437
ENSGALG00000003438
ENSGALG00000003440
ENSGALG00000003441
ENSGALG00000003443
ENSGALG00000003445
ENSGALG00000003446
ENSGALG00000003447
ENSGALG00000003449
ENSGALG00000003454
ENSGALG00000003457
ENSGALG00000003458
ENSGALG00000003461
ENSGALG00000003465
ENSGALG00000003466
ENSGALG00000003467
ENSGALG00000003470
ENSGALG00000003472
ENSGALG00000003473
ENSGALG00000003474
ENSGALG00000003475
ENSGALG00000003476
ENSGALG00000003477
ENSGALG00000003478
ENSGALG00000003479
ENSGALG00000003483
ENSGALG00000003484
ENSGALG00000003485
ENSGALG00000003487
ENSGALG00000003488
ENSGALG00000003490
ENSGALG00000003492
ENSGALG00000003495
ENSGALG00000003496
ENSGALG00000003498
ENSGALG00000003499
ENSGALG00000003500
ENSGALG00000003503
ENSGALG00000003505
ENSGALG00000003507
ENSGALG00000003509
ENSGALG00000003510
ENSGALG00000003512
ENSGALG00000003513
ENSGALG00000003515
ENSGALG00000003516
ENSGALG00000003518
ENSGALG00000003520
ENSGALG00000003521
ENSGALG00000003522
ENSGALG00000003523
ENSGALG00000003527
ENSGALG00000003529
ENSGALG00000003532
ENSGALG00000003533
ENSGALG00000003534
ENSGALG00000003536
ENSGALG00000003537
ENSGALG00000003540
ENSGALG00000003541
ENSGALG00000003546
ENSGALG00000003547
ENSGALG00000003548
ENSGALG00000003550
ENSGALG00000003551
ENSGALG00000003553
ENSGALG00000003554
ENSGALG00000003559
ENSGALG00000003560
ENSGALG00000003561
ENSGALG00000003562
ENSGALG00000003563
ENSGALG00000003567
ENSGALG00000003568
ENSGALG00000003569
ENSGALG00000003570
ENSGALG00000003572
ENSGALG00000003573
ENSGALG00000003574
ENSGALG00000003577
ENSGALG00000003578
ENSGALG00000003580
ENSGALG00000003582
ENSGALG00000003584
ENSGALG00000003589
ENSGALG00000003590
ENSGALG00000003594
ENSGALG00000003595
ENSGALG00000003596
ENSGALG00000003597
ENSGALG00000003601
ENSGALG00000003602
ENSGALG00000003604
ENSGALG00000003605
ENSGALG00000003611
ENSGALG00000003612
ENSGALG00000003614
ENSGALG00000003615
ENSGALG00000003619
ENSGALG00000003628
ENSGALG00000003630
ENSGALG00000003631
ENSGALG00000003634
ENSGALG00000003636
ENSGALG00000003640
ENSGALG00000003641
ENSGALG00000003642
ENSGALG00000003644
ENSGALG00000003648
ENSGALG00000003650
ENSGALG00000003651
ENSGALG00000003652
ENSGALG00000003655
ENSGALG00000003658
ENSGALG00000003659
ENSGALG00000003660
ENSGALG00000003661
ENSGALG00000003663
ENSGALG00000003664
ENSGALG00000003665
ENSGALG00000003668
ENSGALG00000003669
ENSGALG00000003672
ENSGALG00000003675
ENSGALG00000003677
ENSGALG00000003678
ENSGALG00000003681
ENSGALG00000003682
ENSGALG00000003683
ENSGALG00000003684
ENSGALG00000003688
ENSGALG00000003689
ENSGALG00000003690
ENSGALG00000003691
ENSGALG00000003692
ENSGALG00000003693
ENSGALG00000003695
ENSGALG00000003696
ENSGALG00000003699
ENSGALG00000003700
ENSGALG00000003702
ENSGALG00000003703
ENSGALG00000003705
ENSGALG00000003706
ENSGALG00000003708
ENSGALG00000003709
ENSGALG00000003712
ENSGALG00000003716
ENSGALG00000003717
ENSGALG00000003719
ENSGALG00000003720
ENSGALG00000003722
ENSGALG00000003726
ENSGALG00000003727
ENSGALG00000003732
ENSGALG00000003733
ENSGALG00000003734
ENSGALG00000003736
ENSGALG00000003737
ENSGALG00000003738
ENSGALG00000003739
ENSGALG00000003742
ENSGALG00000003744
ENSGALG00000003745
ENSGALG00000003747
ENSGALG00000003748
ENSGALG00000003753
ENSGALG00000003755
ENSGALG00000003758
ENSGALG00000003759
ENSGALG00000003761
ENSGALG00000003763
ENSGALG00000003764
ENSGALG00000003766
ENSGALG00000003767
ENSGALG00000003771
ENSGALG00000003774
ENSGALG00000003775
ENSGALG00000003776
ENSGALG00000003777
ENSGALG00000003778
ENSGALG00000003781
ENSGALG00000003782
ENSGALG00000003786
ENSGALG00000003789
ENSGALG00000003790
ENSGALG00000003792
ENSGALG00000003793
ENSGALG00000003794
ENSGALG00000003795
ENSGALG00000003798
ENSGALG00000003799
ENSGALG00000003800
ENSGALG00000003802
ENSGALG00000003804
ENSGALG00000003805
ENSGALG00000003807
ENSGALG00000003814
ENSGALG00000003815
ENSGALG00000003816
ENSGALG00000003817
ENSGALG00000003818
ENSGALG00000003819
ENSGALG00000003820
ENSGALG00000003821
ENSGALG00000003824
ENSGALG00000003826
ENSGALG00000003829
ENSGALG00000003830
ENSGALG00000003832
ENSGALG00000003833
ENSGALG00000003835
ENSGALG00000003837
ENSGALG00000003838
ENSGALG00000003842
ENSGALG00000003845
ENSGALG00000003847
ENSGALG00000003849
ENSGALG00000003852
ENSGALG00000003854
ENSGALG00000003855
ENSGALG00000003856
ENSGALG00000003859
ENSGALG00000003860
ENSGALG00000003861
ENSGALG00000003862
ENSGALG00000003866
ENSGALG00000003870
ENSGALG00000003874
ENSGALG00000003875
ENSGALG00000003876
ENSGALG00000003879
ENSGALG00000003880
ENSGALG00000003881
ENSGALG00000003882
ENSGALG00000003885
ENSGALG00000003886
ENSGALG00000003887
ENSGALG00000003891
ENSGALG00000003894
ENSGALG00000003895
ENSGALG00000003897
ENSGALG00000003900
ENSGALG00000003901
ENSGALG00000003904
ENSGALG00000003906
ENSGALG00000003907
ENSGALG00000003909
ENSGALG00000003910
ENSGALG00000003911
ENSGALG00000003912
ENSGALG00000003913
ENSGALG00000003914
ENSGALG00000003916
ENSGALG00000003919
ENSGALG00000003920
ENSGALG00000003921
ENSGALG00000003922
ENSGALG00000003923
ENSGALG00000003925
ENSGALG00000003928
ENSGALG00000003929
ENSGALG00000003930
ENSGALG00000003932
ENSGALG00000003933
ENSGALG00000003936
ENSGALG00000003937
ENSGALG00000003938
ENSGALG00000003939
ENSGALG00000003941
ENSGALG00000003942
ENSGALG00000003943
ENSGALG00000003944
ENSGALG00000003947
ENSGALG00000003951
ENSGALG00000003955
ENSGALG00000003957
ENSGALG00000003958
ENSGALG00000003959
ENSGALG00000003965
ENSGALG00000003966
ENSGALG00000003969
ENSGALG00000003970
ENSGALG00000003973
ENSGALG00000003975
ENSGALG00000003977
ENSGALG00000003985
ENSGALG00000003990
ENSGALG00000003991
ENSGALG00000003995
ENSGALG00000003997
ENSGALG00000003999
ENSGALG00000004000
ENSGALG00000004001
ENSGALG00000004002
ENSGALG00000004003
ENSGALG00000004004
ENSGALG00000004005
ENSGALG00000004011
ENSGALG00000004019
ENSGALG00000004021
ENSGALG00000004023
ENSGALG00000004025
ENSGALG00000004028
ENSGALG00000004029
ENSGALG00000004032
ENSGALG00000004033
ENSGALG00000004035
ENSGALG00000004037
ENSGALG00000004038
ENSGALG00000004039
ENSGALG00000004040
ENSGALG00000004042
ENSGALG00000004043
ENSGALG00000004044
ENSGALG00000004045
ENSGALG00000004046
ENSGALG00000004047
ENSGALG00000004048
ENSGALG00000004049
ENSGALG00000004052
ENSGALG00000004055
ENSGALG00000004057
ENSGALG00000004059
ENSGALG00000004060
ENSGALG00000004065
ENSGALG00000004068
ENSGALG00000004070
ENSGALG00000004071
ENSGALG00000004073
ENSGALG00000004074
ENSGALG00000004079
ENSGALG00000004082
ENSGALG00000004083
ENSGALG00000004085
ENSGALG00000004086
ENSGALG00000004087
ENSGALG00000004088
ENSGALG00000004091
ENSGALG00000004093
ENSGALG00000004096
ENSGALG00000004097
ENSGALG00000004098
ENSGALG00000004103
ENSGALG00000004104
ENSGALG00000004106
ENSGALG00000004107
ENSGALG00000004108
ENSGALG00000004110
ENSGALG00000004112
ENSGALG00000004113
ENSGALG00000004115
ENSGALG00000004118
ENSGALG00000004121
ENSGALG00000004122
ENSGALG00000004127
ENSGALG00000004128
ENSGALG00000004129
ENSGALG00000004132
ENSGALG00000004133
ENSGALG00000004134
ENSGALG00000004140
ENSGALG00000004141
ENSGALG00000004142
ENSGALG00000004143
ENSGALG00000004144
ENSGALG00000004146
ENSGALG00000004150
ENSGALG00000004152
ENSGALG00000004153
ENSGALG00000004155
ENSGALG00000004156
ENSGALG00000004157
ENSGALG00000004158
ENSGALG00000004160
ENSGALG00000004161
ENSGALG00000004162
ENSGALG00000004163
ENSGALG00000004165
ENSGALG00000004167
ENSGALG00000004170
ENSGALG00000004172
ENSGALG00000004174
ENSGALG00000004179
ENSGALG00000004180
ENSGALG00000004183
ENSGALG00000004184
ENSGALG00000004186
ENSGALG00000004187
ENSGALG00000004189
ENSGALG00000004190
ENSGALG00000004191
ENSGALG00000004192
ENSGALG00000004193
ENSGALG00000004195
ENSGALG00000004196
ENSGALG00000004197
ENSGALG00000004198
ENSGALG00000004199
ENSGALG00000004200
ENSGALG00000004201
ENSGALG00000004203
ENSGALG00000004204
ENSGALG00000004205
ENSGALG00000004208
ENSGALG00000004209
ENSGALG00000004213
ENSGALG00000004216
[truncated: 8,323 more rows]

## Sheet: Xenopus laevis
XeXenL6RMv10000001m
XeXenL6RMv10000004m
XeXenL6RMv10000005m
XeXenL6RMv10000008m
XeXenL6RMv10000009m
XeXenL6RMv10000010m
XeXenL6RMv10000015m
XeXenL6RMv10000018m
XeXenL6RMv10000019m
XeXenL6RMv10000020m
XeXenL6RMv10000022m
XeXenL6RMv10000025m
XeXenL6RMv10000026m
XeXenL6RMv10000028m
XeXenL6RMv10000030m
XeXenL6RMv10000031m
XeXenL6RMv10000032m
XeXenL6RMv10000033m
XeXenL6RMv10000034m
XeXenL6RMv10000036m
XeXenL6RMv10000037m
XeXenL6RMv10000038m
XeXenL6RMv10000039m
XeXenL6RMv10000041m
XeXenL6RMv10000042m
XeXenL6RMv10000043m
XeXenL6RMv10000046m
XeXenL6RMv10000047m
XeXenL6RMv10000048m
XeXenL6RMv10000055m
XeXenL6RMv10000056m
XeXenL6RMv10000057m
XeXenL6RMv10000058m
XeXenL6RMv10000060m
XeXenL6RMv10000063m
XeXenL6RMv10000064m
XeXenL6RMv10000065m
XeXenL6RMv10000066m
XeXenL6RMv10000068m
XeXenL6RMv10000069m
XeXenL6RMv10000071m
XeXenL6RMv10000072m
XeXenL6RMv10000076m
XeXenL6RMv10000079m
XeXenL6RMv10000081m
XeXenL6RMv10000082m
XeXenL6RMv10000083m
XeXenL6RMv10000085m
XeXenL6RMv10000087m
XeXenL6RMv10000088m
XeXenL6RMv10000089m
XeXenL6RMv10000092m
XeXenL6RMv10000093m
XeXenL6RMv10000094m
XeXenL6RMv10000096m
XeXenL6RMv10000097m
XeXenL6RMv10000099m
XeXenL6RMv10000100m
XeXenL6RMv10000102m
XeXenL6RMv10000103m
XeXenL6RMv10000106m
XeXenL6RMv10000107m
XeXenL6RMv10000108m
XeXenL6RMv10000109m
XeXenL6RMv10000110m
XeXenL6RMv10000111m
XeXenL6RMv10000112m
XeXenL6RMv10000114m
XeXenL6RMv10000117m
XeXenL6RMv10000118m
XeXenL6RMv10000119m
XeXenL6RMv10000120m
XeXenL6RMv10000129m
XeXenL6RMv10000140m
XeXenL6RMv10000141m
XeXenL6RMv10000144m
XeXenL6RMv10000146m
XeXenL6RMv10000149m
XeXenL6RMv10000151m
XeXenL6RMv10000153m
XeXenL6RMv10000160m
XeXenL6RMv10000161m
XeXenL6RMv10000163m
XeXenL6RMv10000164m
XeXenL6RMv10000166m
XeXenL6RMv10000167m
XeXenL6RMv10000168m
XeXenL6RMv10000169m
XeXenL6RMv10000170m
XeXenL6RMv10000171m
XeXenL6RMv10000176m
XeXenL6RMv10000177m
XeXenL6RMv10000178m
XeXenL6RMv10000179m
XeXenL6RMv10000180m
XeXenL6RMv10000181m
XeXenL6RMv10000183m
XeXenL6RMv10000184m
XeXenL6RMv10000185m
XeXenL6RMv10000187m
XeXenL6RMv10000188m
XeXenL6RMv10000190m
XeXenL6RMv10000191m
XeXenL6RMv10000192m
XeXenL6RMv10000193m
XeXenL6RMv10000199m
XeXenL6RMv10000200m
XeXenL6RMv10000201m
XeXenL6RMv10000203m
XeXenL6RMv10000205m
XeXenL6RMv10000206m
XeXenL6RMv10000207m
XeXenL6RMv10000208m
XeXenL6RMv10000209m
XeXenL6RMv10000210m
XeXenL6RMv10000211m
XeXenL6RMv10000212m
XeXenL6RMv10000213m
XeXenL6RMv10000215m
XeXenL6RMv10000216m
XeXenL6RMv10000217m
XeXenL6RMv10000220m
XeXenL6RMv10000222m
XeXenL6RMv10000223m
XeXenL6RMv10000224m
XeXenL6RMv10000225m
XeXenL6RMv10000227m
XeXenL6RMv10000229m
XeXenL6RMv10000231m
XeXenL6RMv10000233m
XeXenL6RMv10000234m
XeXenL6RMv10000235m
XeXenL6RMv10000236m
XeXenL6RMv10000238m
XeXenL6RMv10000239m
XeXenL6RMv10000240m
XeXenL6RMv10000241m
XeXenL6RMv10000242m
XeXenL6RMv10000243m
XeXenL6RMv10000244m
XeXenL6RMv10000245m
XeXenL6RMv10000247m
XeXenL6RMv10000248m
XeXenL6RMv10000249m
XeXenL6RMv10000250m
XeXenL6RMv10000251m
XeXenL6RMv10000252m
XeXenL6RMv10000253m
XeXenL6RMv10000254m
XeXenL6RMv10000257m
XeXenL6RMv10000259m
XeXenL6RMv10000260m
XeXenL6RMv10000268m
XeXenL6RMv10000269m
XeXenL6RMv10000270m
XeXenL6RMv10000272m
XeXenL6RMv10000274m
XeXenL6RMv10000275m
XeXenL6RMv10000277m
XeXenL6RMv10000281m
XeXenL6RMv10000282m
XeXenL6RMv10000283m
XeXenL6RMv10000284m
XeXenL6RMv10000285m
XeXenL6RMv10000287m
XeXenL6RMv10000288m
XeXenL6RMv10000289m
XeXenL6RMv10000290m
XeXenL6RMv10000291m
XeXenL6RMv10000292m
XeXenL6RMv10000295m
XeXenL6RMv10000297m
XeXenL6RMv10000302m
XeXenL6RMv10000313m
XeXenL6RMv10000316m
XeXenL6RMv10000317m
XeXenL6RMv10000318m
XeXenL6RMv10000319m
XeXenL6RMv10000321m
XeXenL6RMv10000322m
XeXenL6RMv10000324m
XeXenL6RMv10000326m
XeXenL6RMv10000328m
XeXenL6RMv10000330m
XeXenL6RMv10000331m
XeXenL6RMv10000332m
XeXenL6RMv10000333m
XeXenL6RMv10000335m
XeXenL6RMv10000336m
XeXenL6RMv10000338m
XeXenL6RMv10000339m
XeXenL6RMv10000340m
XeXenL6RMv10000341m
XeXenL6RMv10000342m
XeXenL6RMv10000343m
XeXenL6RMv10000345m
XeXenL6RMv10000347m
XeXenL6RMv10000351m
XeXenL6RMv10000352m
XeXenL6RMv10000355m
XeXenL6RMv10000356m
XeXenL6RMv10000357m
XeXenL6RMv10000358m
XeXenL6RMv10000359m
XeXenL6RMv10000361m
XeXenL6RMv10000362m
XeXenL6RMv10000363m
XeXenL6RMv10000365m
XeXenL6RMv10000366m
XeXenL6RMv10000368m
XeXenL6RMv10000369m
XeXenL6RMv10000370m
XeXenL6RMv10000371m
XeXenL6RMv10000372m
XeXenL6RMv10000373m
XeXenL6RMv10000374m
XeXenL6RMv10000376m
XeXenL6RMv10000378m
XeXenL6RMv10000379m
XeXenL6RMv10000381m
XeXenL6RMv10000384m
XeXenL6RMv10000385m
XeXenL6RMv10000387m
XeXenL6RMv10000388m
XeXenL6RMv10000389m
XeXenL6RMv10000390m
XeXenL6RMv10000391m
XeXenL6RMv10000396m
XeXenL6RMv10000401m
XeXenL6RMv10000402m
XeXenL6RMv10000404m
XeXenL6RMv10000405m
XeXenL6RMv10000407m
XeXenL6RMv10000408m
XeXenL6RMv10000412m
XeXenL6RMv10000416m
XeXenL6RMv10000417m
XeXenL6RMv10000419m
XeXenL6RMv10000421m
XeXenL6RMv10000423m
XeXenL6RMv10000425m
XeXenL6RMv10000429m
XeXenL6RMv10000430m
XeXenL6RMv10000434m
XeXenL6RMv10000435m
XeXenL6RMv10000436m
XeXenL6RMv10000440m
XeXenL6RMv10000446m
XeXenL6RMv10000450m
XeXenL6RMv10000451m
XeXenL6RMv10000453m
XeXenL6RMv10000455m
XeXenL6RMv10000456m
XeXenL6RMv10000457m
XeXenL6RMv10000458m
XeXenL6RMv10000464m
XeXenL6RMv10000465m
XeXenL6RMv10000468m
XeXenL6RMv10000470m
XeXenL6RMv10000471m
XeXenL6RMv10000472m
XeXenL6RMv10000475m
XeXenL6RMv10000478m
XeXenL6RMv10000480m
XeXenL6RMv10000481m
XeXenL6RMv10000483m
XeXenL6RMv10000487m
XeXenL6RMv10000488m
XeXenL6RMv10000502m
XeXenL6RMv10000514m
XeXenL6RMv10000519m
XeXenL6RMv10000524m
XeXenL6RMv10000525m
XeXenL6RMv10000526m
XeXenL6RMv10000527m
XeXenL6RMv10000528m
XeXenL6RMv10000530m
XeXenL6RMv10000531m
XeXenL6RMv10000533m
XeXenL6RMv10000534m
XeXenL6RMv10000536m
XeXenL6RMv10000537m
XeXenL6RMv10000540m
XeXenL6RMv10000541m
XeXenL6RMv10000542m
XeXenL6RMv10000546m
XeXenL6RMv10000551m
XeXenL6RMv10000552m
XeXenL6RMv10000553m
XeXenL6RMv10000554m
XeXenL6RMv10000555m
XeXenL6RMv10000557m
XeXenL6RMv10000560m
XeXenL6RMv10000563m
XeXenL6RMv10000564m
XeXenL6RMv10000565m
XeXenL6RMv10000569m
XeXenL6RMv10000571m
XeXenL6RMv10000575m
XeXenL6RMv10000576m
XeXenL6RMv10000577m
XeXenL6RMv10000579m
XeXenL6RMv10000580m
XeXenL6RMv10000585m
XeXenL6RMv10000586m
XeXenL6RMv10000587m
XeXenL6RMv10000590m
XeXenL6RMv10000593m
XeXenL6RMv10000594m
XeXenL6RMv10000596m
XeXenL6RMv10000604m
XeXenL6RMv10000607m
XeXenL6RMv10000611m
XeXenL6RMv10000612m
XeXenL6RMv10000615m
XeXenL6RMv10000617m
XeXenL6RMv10000618m
XeXenL6RMv10000619m
XeXenL6RMv10000620m
XeXenL6RMv10000623m
XeXenL6RMv10000624m
XeXenL6RMv10000625m
XeXenL6RMv10000628m
XeXenL6RMv10000631m
XeXenL6RMv10000632m
XeXenL6RMv10000633m
XeXenL6RMv10000636m
XeXenL6RMv10000640m
XeXenL6RMv10000641m
XeXenL6RMv10000642m
XeXenL6RMv10000643m
XeXenL6RMv10000644m
XeXenL6RMv10000645m
XeXenL6RMv10000668m
XeXenL6RMv10000669m
XeXenL6RMv10000677m
XeXenL6RMv10000679m
XeXenL6RMv10000681m
XeXenL6RMv10000682m
XeXenL6RMv10000683m
XeXenL6RMv10000684m
XeXenL6RMv10000688m
XeXenL6RMv10000690m
XeXenL6RMv10000691m
XeXenL6RMv10000692m
XeXenL6RMv10000693m
XeXenL6RMv10000694m
XeXenL6RMv10000696m
XeXenL6RMv10000700m
XeXenL6RMv10000702m
XeXenL6RMv10000703m
XeXenL6RMv10000704m
XeXenL6RMv10000705m
XeXenL6RMv10000706m
XeXenL6RMv10000708m
XeXenL6RMv10000709m
XeXenL6RMv10000710m
XeXenL6RMv10000712m
XeXenL6RMv10000713m
XeXenL6RMv10000714m
XeXenL6RMv10000716m
XeXenL6RMv10000717m
XeXenL6RMv10000718m
XeXenL6RMv10000721m
XeXenL6RMv10000722m
XeXenL6RMv10000725m
XeXenL6RMv10000726m
XeXenL6RMv10000727m
XeXenL6RMv10000730m
XeXenL6RMv10000731m
XeXenL6RMv10000733m
XeXenL6RMv10000734m
XeXenL6RMv10000735m
XeXenL6RMv10000737m
XeXenL6RMv10000743m
XeXenL6RMv10000745m
XeXenL6RMv10000747m
XeXenL6RMv10000748m
XeXenL6RMv10000749m
XeXenL6RMv10000750m
XeXenL6RMv10000751m
XeXenL6RMv10000752m
XeXenL6RMv10000753m
XeXenL6RMv10000755m
XeXenL6RMv10000756m
XeXenL6RMv10000757m
XeXenL6RMv10000760m
XeXenL6RMv10000761m
XeXenL6RMv10000762m
XeXenL6RMv10000764m
XeXenL6RMv10000765m
XeXenL6RMv10000772m
XeXenL6RMv10000774m
XeXenL6RMv10000775m
XeXenL6RMv10000776m
XeXenL6RMv10000778m
XeXenL6RMv10000780m
XeXenL6RMv10000782m
XeXenL6RMv10000784m
XeXenL6RMv10000785m
XeXenL6RMv10000796m
XeXenL6RMv10000806m
XeXenL6RMv10000811m
XeXenL6RMv10000813m
XeXenL6RMv10000826m
XeXenL6RMv10000828m
XeXenL6RMv10000831m
XeXenL6RMv10000832m
XeXenL6RMv10000834m
XeXenL6RMv10000835m
XeXenL6RMv10000836m
XeXenL6RMv10000839m
XeXenL6RMv10000840m
XeXenL6RMv10000842m
XeXenL6RMv10000843m
XeXenL6RMv10000844m
XeXenL6RMv10000845m
XeXenL6RMv10000846m
XeXenL6RMv10000849m
XeXenL6RMv10000850m
XeXenL6RMv10000854m
XeXenL6RMv10000855m
XeXenL6RMv10000866m
XeXenL6RMv10000867m
XeXenL6RMv10000868m
XeXenL6RMv10000869m
XeXenL6RMv10000870m
XeXenL6RMv10000871m
XeXenL6RMv10000872m
XeXenL6RMv10000873m
XeXenL6RMv10000876m
XeXenL6RMv10000877m
XeXenL6RMv10000879m
XeXenL6RMv10000880m
XeXenL6RMv10000882m
XeXenL6RMv10000884m
XeXenL6RMv10000885m
XeXenL6RMv10000886m
XeXenL6RMv10000887m
XeXenL6RMv10000888m
XeXenL6RMv10000889m
XeXenL6RMv10000892m
XeXenL6RMv10000896m
XeXenL6RMv10000897m
XeXenL6RMv10000902m
XeXenL6RMv10000904m
XeXenL6RMv10000906m
XeXenL6RMv10000911m
XeXenL6RMv10000913m
XeXenL6RMv10000915m
XeXenL6RMv10000918m
XeXenL6RMv10000919m
XeXenL6RMv10000920m
XeXenL6RMv10000921m
XeXenL6RMv10000922m
XeXenL6RMv10000923m
XeXenL6RMv10000925m
XeXenL6RMv10000930m
XeXenL6RMv10000931m
XeXenL6RMv10000935m
XeXenL6RMv10000938m
XeXenL6RMv10000939m
XeXenL6RMv10000940m
XeXenL6RMv10000941m
XeXenL6RMv10000942m
XeXenL6RMv10000943m
XeXenL6RMv10000959m
XeXenL6RMv10000961m
XeXenL6RMv10000962m
XeXenL6RMv10000963m
XeXenL6RMv10000964m
XeXenL6RMv10000965m
XeXenL6RMv10000966m
XeXenL6RMv10000980m
XeXenL6RMv10000981m
XeXenL6RMv10000982m
XeXenL6RMv10000983m
XeXenL6RMv10000986m
XeXenL6RMv10000988m
XeXenL6RMv10000989m
XeXenL6RMv10000990m
XeXenL6RMv10000991m
XeXenL6RMv10000992m
XeXenL6RMv10000994m
XeXenL6RMv10000996m
XeXenL6RMv10000997m
XeXenL6RMv10001002m
XeXenL6RMv10001005m
XeXenL6RMv10001006m
XeXenL6RMv10001007m
XeXenL6RMv10001009m
XeXenL6RMv10001011m
XeXenL6RMv10001012m
XeXenL6RMv10001014m
XeXenL6RMv10001016m
XeXenL6RMv10001017m
XeXenL6RMv10001019m
XeXenL6RMv10001020m
XeXenL6RMv10001023m
XeXenL6RMv10001024m
XeXenL6RMv10001025m
XeXenL6RMv10001026m
XeXenL6RMv10001028m
XeXenL6RMv10001029m
XeXenL6RMv10001030m
XeXenL6RMv10001032m
XeXenL6RMv10001033m
XeXenL6RMv10001034m
XeXenL6RMv10001035m
XeXenL6RMv10001036m
XeXenL6RMv10001037m
XeXenL6RMv10001038m
XeXenL6RMv10001039m
XeXenL6RMv10001040m
XeXenL6RMv10001042m
XeXenL6RMv10001043m
XeXenL6RMv10001044m
XeXenL6RMv10001045m
XeXenL6RMv10001046m
XeXenL6RMv10001047m
XeXenL6RMv10001048m
XeXenL6RMv10001050m
XeXenL6RMv10001052m
XeXenL6RMv10001055m
XeXenL6RMv10001056m
XeXenL6RMv10001057m
XeXenL6RMv10001060m
XeXenL6RMv10001062m
XeXenL6RMv10001063m
XeXenL6RMv10001064m
XeXenL6RMv10001065m
XeXenL6RMv10001066m
XeXenL6RMv10001070m
XeXenL6RMv10001071m
XeXenL6RMv10001079m
XeXenL6RMv10001080m
XeXenL6RMv10001081m
XeXenL6RMv10001082m
XeXenL6RMv10001083m
XeXenL6RMv10001084m
XeXenL6RMv10001086m
XeXenL6RMv10001087m
XeXenL6RMv10001093m
XeXenL6RMv10001094m
XeXenL6RMv10001095m
XeXenL6RMv10001097m
XeXenL6RMv10001100m
XeXenL6RMv10001102m
XeXenL6RMv10001108m
XeXenL6RMv10001109m
XeXenL6RMv10001110m
XeXenL6RMv10001111m
XeXenL6RMv10001112m
XeXenL6RMv10001115m
XeXenL6RMv10001116m
XeXenL6RMv10001118m
XeXenL6RMv10001120m
XeXenL6RMv10001122m
XeXenL6RMv10001123m
XeXenL6RMv10001124m
XeXenL6RMv10001125m
XeXenL6RMv10001126m
XeXenL6RMv10001127m
XeXenL6RMv10001128m
XeXenL6RMv10001130m
XeXenL6RMv10001132m
XeXenL6RMv10001134m
XeXenL6RMv10001137m
XeXenL6RMv10001141m
XeXenL6RMv10001146m
XeXenL6RMv10001148m
XeXenL6RMv10001149m
XeXenL6RMv10001151m
XeXenL6RMv10001152m
XeXenL6RMv10001155m
XeXenL6RMv10001158m
XeXenL6RMv10001159m
XeXenL6RMv10001160m
XeXenL6RMv10001161m
XeXenL6RMv10001162m
XeXenL6RMv10001168m
XeXenL6RMv10001171m
XeXenL6RMv10001172m
XeXenL6RMv10001174m
XeXenL6RMv10001175m
XeXenL6RMv10001176m
XeXenL6RMv10001178m
XeXenL6RMv10001180m
XeXenL6RMv10001181m
XeXenL6RMv10001182m
XeXenL6RMv10001183m
XeXenL6RMv10001185m
XeXenL6RMv10001186m
XeXenL6RMv10001187m
XeXenL6RMv10001188m
XeXenL6RMv10001189m
XeXenL6RMv10001192m
XeXenL6RMv10001193m
XeXenL6RMv10001194m
XeXenL6RMv10001195m
XeXenL6RMv10001199m
XeXenL6RMv10001201m
XeXenL6RMv10001202m
XeXenL6RMv10001203m
XeXenL6RMv10001204m
XeXenL6RMv10001205m
XeXenL6RMv10001206m
XeXenL6RMv10001207m
XeXenL6RMv10001208m
XeXenL6RMv10001209m
XeXenL6RMv10001210m
XeXenL6RMv10001213m
XeXenL6RMv10001214m
XeXenL6RMv10001215m
XeXenL6RMv10001217m
XeXenL6RMv10001218m
XeXenL6RMv10001220m
XeXenL6RMv10001221m
XeXenL6RMv10001222m
XeXenL6RMv10001223m
XeXenL6RMv10001224m
XeXenL6RMv10001226m
XeXenL6RMv10001227m
XeXenL6RMv10001228m
XeXenL6RMv10001230m
XeXenL6RMv10001232m
XeXenL6RMv10001237m
XeXenL6RMv10001238m
XeXenL6RMv10001239m
XeXenL6RMv10001240m
XeXenL6RMv10001241m
XeXenL6RMv10001242m
XeXenL6RMv10001243m
XeXenL6RMv10001244m
XeXenL6RMv10001246m
XeXenL6RMv10001247m
XeXenL6RMv10001249m
XeXenL6RMv10001250m
XeXenL6RMv10001251m
XeXenL6RMv10001252m
XeXenL6RMv10001253m
XeXenL6RMv10001254m
XeXenL6RMv10001255m
XeXenL6RMv10001256m
XeXenL6RMv10001257m
XeXenL6RMv10001260m
XeXenL6RMv10001265m
XeXenL6RMv10001267m
XeXenL6RMv10001270m
XeXenL6RMv10001272m
XeXenL6RMv10001273m
XeXenL6RMv10001274m
XeXenL6RMv10001277m
XeXenL6RMv10001278m
XeXenL6RMv10001279m
XeXenL6RMv10001280m
XeXenL6RMv10001281m
XeXenL6RMv10001296m
XeXenL6RMv10001297m
XeXenL6RMv10001298m
XeXenL6RMv10001299m
XeXenL6RMv10001304m
XeXenL6RMv10001306m
XeXenL6RMv10001307m
XeXenL6RMv10001309m
XeXenL6RMv10001311m
XeXenL6RMv10001316m
XeXenL6RMv10001319m
XeXenL6RMv10001323m
XeXenL6RMv10001324m
XeXenL6RMv10001327m
XeXenL6RMv10001331m
XeXenL6RMv10001333m
XeXenL6RMv10001334m
XeXenL6RMv10001335m
XeXenL6RMv10001336m
XeXenL6RMv10001337m
XeXenL6RMv10001338m
XeXenL6RMv10001341m
XeXenL6RMv10001343m
XeXenL6RMv10001344m
XeXenL6RMv10001346m
XeXenL6RMv10001347m
XeXenL6RMv10001348m
XeXenL6RMv10001349m
XeXenL6RMv10001350m
XeXenL6RMv10001351m
XeXenL6RMv10001352m
XeXenL6RMv10001357m
XeXenL6RMv10001365m
XeXenL6RMv10001366m
XeXenL6RMv10001368m
XeXenL6RMv10001372m
XeXenL6RMv10001374m
XeXenL6RMv10001375m
XeXenL6RMv10001376m
XeXenL6RMv10001377m
XeXenL6RMv10001378m
XeXenL6RMv10001379m
XeXenL6RMv10001380m
XeXenL6RMv10001381m
XeXenL6RMv10001382m
XeXenL6RMv10001384m
XeXenL6RMv10001385m
XeXenL6RMv10001386m
XeXenL6RMv10001387m
XeXenL6RMv10001390m
XeXenL6RMv10001396m
XeXenL6RMv10001397m
XeXenL6RMv10001398m
XeXenL6RMv10001399m
XeXenL6RMv10001404m
XeXenL6RMv10001406m
XeXenL6RMv10001409m
XeXenL6RMv10001410m
XeXenL6RMv10001413m
XeXenL6RMv10001415m
XeXenL6RMv10001416m
XeXenL6RMv10001417m
XeXenL6RMv10001419m
XeXenL6RMv10001420m
XeXenL6RMv10001422m
XeXenL6RMv10001423m
XeXenL6RMv10001425m
XeXenL6RMv10001426m
XeXenL6RMv10001427m
XeXenL6RMv10001428m
XeXenL6RMv10001429m
XeXenL6RMv10001430m
XeXenL6RMv10001431m
XeXenL6RMv10001433m
XeXenL6RMv10001434m
XeXenL6RMv10001436m
XeXenL6RMv10001437m
XeXenL6RMv10001438m
XeXenL6RMv10001443m
XeXenL6RMv10001446m
XeXenL6RMv10001449m
XeXenL6RMv10001451m
XeXenL6RMv10001453m
XeXenL6RMv10001454m
XeXenL6RMv10001456m
XeXenL6RMv10001458m
XeXenL6RMv10001459m
XeXenL6RMv10001461m
XeXenL6RMv10001462m
XeXenL6RMv10001463m
XeXenL6RMv10001468m
XeXenL6RMv10001469m
XeXenL6RMv10001470m
XeXenL6RMv10001472m
XeXenL6RMv10001475m
XeXenL6RMv10001476m
XeXenL6RMv10001478m
XeXenL6RMv10001479m
XeXenL6RMv10001481m
XeXenL6RMv10001483m
XeXenL6RMv10001484m
XeXenL6RMv10001485m
XeXenL6RMv10001488m
XeXenL6RMv10001489m
XeXenL6RMv10001492m
XeXenL6RMv10001496m
XeXenL6RMv10001497m
XeXenL6RMv10001498m
XeXenL6RMv10001499m
XeXenL6RMv10001500m
XeXenL6RMv10001501m
XeXenL6RMv10001502m
XeXenL6RMv10001504m
XeXenL6RMv10001505m
XeXenL6RMv10001506m
XeXenL6RMv10001507m
XeXenL6RMv10001511m
XeXenL6RMv10001512m
XeXenL6RMv10001513m
XeXenL6RMv10001514m
XeXenL6RMv10001515m
XeXenL6RMv10001516m
XeXenL6RMv10001517m
XeXenL6RMv10001518m
XeXenL6RMv10001520m
XeXenL6RMv10001521m
XeXenL6RMv10001522m
XeXenL6RMv10001524m
XeXenL6RMv10001525m
XeXenL6RMv10001526m
XeXenL6RMv10001529m
XeXenL6RMv10001530m
XeXenL6RMv10001531m
XeXenL6RMv10001533m
XeXenL6RMv10001534m
XeXenL6RMv10001541m
XeXenL6RMv10001545m
XeXenL6RMv10001552m
XeXenL6RMv10001553m
XeXenL6RMv10001554m
XeXenL6RMv10001555m
XeXenL6RMv10001556m
XeXenL6RMv10001557m
XeXenL6RMv10001559m
XeXenL6RMv10001560m
XeXenL6RMv10001564m
XeXenL6RMv10001565m
XeXenL6RMv10001566m
XeXenL6RMv10001568m
XeXenL6RMv10001572m
XeXenL6RMv10001573m
XeXenL6RMv10001574m
XeXenL6RMv10001577m
XeXenL6RMv10001578m
XeXenL6RMv10001580m
XeXenL6RMv10001588m
XeXenL6RMv10001591m
XeXenL6RMv10001592m
XeXenL6RMv10001594m
XeXenL6RMv10001595m
XeXenL6RMv10001596m
XeXenL6RMv10001598m
XeXenL6RMv10001599m
XeXenL6RMv10001601m
XeXenL6RMv10001602m
XeXenL6RMv10001603m
XeXenL6RMv10001604m
XeXenL6RMv10001605m
XeXenL6RMv10001606m
XeXenL6RMv10001607m
XeXenL6RMv10001610m
XeXenL6RMv10001611m
XeXenL6RMv10001613m
XeXenL6RMv10001617m
XeXenL6RMv10001618m
XeXenL6RMv10001619m
XeXenL6RMv10001621m
XeXenL6RMv10001622m
XeXenL6RMv10001632m
XeXenL6RMv10001633m
XeXenL6RMv10001635m
XeXenL6RMv10001636m
XeXenL6RMv10001641m
XeXenL6RMv10001642m
XeXenL6RMv10001644m
XeXenL6RMv10001645m
XeXenL6RMv10001646m
XeXenL6RMv10001647m
XeXenL6RMv10001648m
XeXenL6RMv10001649m
XeXenL6RMv10001650m
XeXenL6RMv10001652m
XeXenL6RMv10001653m
XeXenL6RMv10001661m
XeXenL6RMv10001662m
XeXenL6RMv10001663m
XeXenL6RMv10001669m
XeXenL6RMv10001671m
XeXenL6RMv10001673m
XeXenL6RMv10001678m
XeXenL6RMv10001679m
XeXenL6RMv10001681m
XeXenL6RMv10001682m
XeXenL6RMv10001684m
XeXenL6RMv10001686m
XeXenL6RMv10001687m
XeXenL6RMv10001692m
XeXenL6RMv10001693m
XeXenL6RMv10001694m
XeXenL6RMv10001695m
XeXenL6RMv10001696m
XeXenL6RMv10001699m
XeXenL6RMv10001703m
XeXenL6RMv10001704m
XeXenL6RMv10001705m
XeXenL6RMv10001706m
XeXenL6RMv10001707m
XeXenL6RMv10001708m
XeXenL6RMv10001710m
XeXenL6RMv10001711m
XeXenL6RMv10001713m
XeXenL6RMv10001714m
XeXenL6RMv10001718m
XeXenL6RMv10001720m
XeXenL6RMv10001721m
XeXenL6RMv10001723m
XeXenL6RMv10001727m
XeXenL6RMv10001730m
XeXenL6RMv10001731m
XeXenL6RMv10001732m
XeXenL6RMv10001735m
XeXenL6RMv10001736m
XeXenL6RMv10001737m
XeXenL6RMv10001738m
XeXenL6RMv10001740m
XeXenL6RMv10001743m
XeXenL6RMv10001744m
XeXenL6RMv10001746m
XeXenL6RMv10001751m
XeXenL6RMv10001752m
XeXenL6RMv10001753m
XeXenL6RMv10001754m
XeXenL6RMv10001755m
XeXenL6RMv10001756m
XeXenL6RMv10001758m
XeXenL6RMv10001759m
XeXenL6RMv10001760m
XeXenL6RMv10001764m
XeXenL6RMv10001765m
XeXenL6RMv10001766m
XeXenL6RMv10001767m
XeXenL6RMv10001771m
XeXenL6RMv10001773m
XeXenL6RMv10001774m
XeXenL6RMv10001775m
XeXenL6RMv10001777m
XeXenL6RMv10001783m
XeXenL6RMv10001784m
XeXenL6RMv10001790m
XeXenL6RMv10001792m
XeXenL6RMv10001794m
XeXenL6RMv10001796m
XeXenL6RMv10001798m
XeXenL6RMv10001799m
XeXenL6RMv10001800m
XeXenL6RMv10001801m
XeXenL6RMv10001809m
XeXenL6RMv10001810m
XeXenL6RMv10001813m
XeXenL6RMv10001815m
XeXenL6RMv10001816m
XeXenL6RMv10001817m
XeXenL6RMv10001818m
XeXenL6RMv10001819m
XeXenL6RMv10001820m
XeXenL6RMv10001821m
XeXenL6RMv10001823m
XeXenL6RMv10001828m
XeXenL6RMv10001830m
XeXenL6RMv10001831m
XeXenL6RMv10001833m
XeXenL6RMv10001834m
XeXenL6RMv10001835m
XeXenL6RMv10001836m
XeXenL6RMv10001839m
XeXenL6RMv10001840m
XeXenL6RMv10001841m
XeXenL6RMv10001843m
XeXenL6RMv10001844m
XeXenL6RMv10001845m
XeXenL6RMv10001849m
XeXenL6RMv10001850m
XeXenL6RMv10001854m
XeXenL6RMv10001865m
XeXenL6RMv10001868m
XeXenL6RMv10001873m
XeXenL6RMv10001874m
XeXenL6RMv10001875m
XeXenL6RMv10001877m
XeXenL6RMv10001880m
XeXenL6RMv10001881m
XeXenL6RMv10001882m
XeXenL6RMv10001883m
XeXenL6RMv10001886m
XeXenL6RMv10001889m
XeXenL6RMv10001895m
XeXenL6RMv10001896m
XeXenL6RMv10001897m
XeXenL6RMv10001901m
XeXenL6RMv10001904m
XeXenL6RMv10001905m
XeXenL6RMv10001907m
XeXenL6RMv10001910m
XeXenL6RMv10001912m
XeXenL6RMv10001914m
XeXenL6RMv10001916m
XeXenL6RMv10001917m
XeXenL6RMv10001918m
XeXenL6RMv10001919m
XeXenL6RMv10001920m
XeXenL6RMv10001924m
XeXenL6RMv10001925m
XeXenL6RMv10001930m
XeXenL6RMv10001931m
XeXenL6RMv10001932m
XeXenL6RMv10001936m
XeXenL6RMv10001937m
XeXenL6RMv10001938m
XeXenL6RMv10001939m
XeXenL6RMv10001940m
XeXenL6RMv10001945m
XeXenL6RMv10001947m
XeXenL6RMv10001949m
XeXenL6RMv10001956m
XeXenL6RMv10001961m
XeXenL6RMv10001962m
XeXenL6RMv10001965m
XeXenL6RMv10001966m
XeXenL6RMv10001967m
XeXenL6RMv10001992m
XeXenL6RMv10001997m
XeXenL6RMv10002000m
XeXenL6RMv10002001m
XeXenL6RMv10002002m
XeXenL6RMv10002003m
XeXenL6RMv10002007m
XeXenL6RMv10002012m
XeXenL6RMv10002013m
XeXenL6RMv10002020m
XeXenL6RMv10002024m
XeXenL6RMv10002025m
XeXenL6RMv10002026m
XeXenL6RMv10002028m
XeXenL6RMv10002030m
XeXenL6RMv10002031m
XeXenL6RMv10002035m
XeXenL6RMv10002038m
XeXenL6RMv10002039m
XeXenL6RMv10002041m
XeXenL6RMv10002042m
XeXenL6RMv10002046m
XeXenL6RMv10002047m
XeXenL6RMv10002049m
XeXenL6RMv10002054m
XeXenL6RMv10002055m
XeXenL6RMv10002061m
XeXenL6RMv10002062m
XeXenL6RMv10002065m
XeXenL6RMv10002067m
XeXenL6RMv10002069m
XeXenL6RMv10002070m
XeXenL6RMv10002071m
XeXenL6RMv10002073m
XeXenL6RMv10002074m
XeXenL6RMv10002075m
XeXenL6RMv10002076m
XeXenL6RMv10002077m
XeXenL6RMv10002080m
XeXenL6RMv10002082m
XeXenL6RMv10002083m
XeXenL6RMv10002084m
XeXenL6RMv10002086m
XeXenL6RMv10002090m
XeXenL6RMv10002093m
XeXenL6RMv10002100m
XeXenL6RMv10002103m
XeXenL6RMv10002106m
XeXenL6RMv10002109m
XeXenL6RMv10002110m
XeXenL6RMv10002111m
XeXenL6RMv10002112m
XeXenL6RMv10002113m
XeXenL6RMv10002118m
XeXenL6RMv10002119m
XeXenL6RMv10002120m
XeXenL6RMv10002121m
XeXenL6RMv10002122m
XeXenL6RMv10002123m
XeXenL6RMv10002124m
XeXenL6RMv10002125m
XeXenL6RMv10002126m
XeXenL6RMv10002127m
XeXenL6RMv10002128m
XeXenL6RMv10002135m
XeXenL6RMv10002136m
XeXenL6RMv10002137m
XeXenL6RMv10002138m
XeXenL6RMv10002140m
XeXenL6RMv10002141m
XeXenL6RMv10002142m
XeXenL6RMv10002143m
XeXenL6RMv10002147m
XeXenL6RMv10002149m
XeXenL6RMv10002151m
XeXenL6RMv10002152m
XeXenL6RMv10002153m
XeXenL6RMv10002154m
XeXenL6RMv10002155m
XeXenL6RMv10002156m
XeXenL6RMv10002157m
XeXenL6RMv10002158m
XeXenL6RMv10002160m
XeXenL6RMv10002161m
XeXenL6RMv10002162m
XeXenL6RMv10002163m
XeXenL6RMv10002164m
XeXenL6RMv10002166m
XeXenL6RMv10002167m
XeXenL6RMv10002170m
XeXenL6RMv10002171m
XeXenL6RMv10002172m
XeXenL6RMv10002173m
XeXenL6RMv10002174m
XeXenL6RMv10002176m
XeXenL6RMv10002182m
XeXenL6RMv10002183m
XeXenL6RMv10002184m
XeXenL6RMv10002185m
XeXenL6RMv10002186m
XeXenL6RMv10002187m
XeXenL6RMv10002188m
XeXenL6RMv10002189m
XeXenL6RMv10002190m
XeXenL6RMv10002193m
XeXenL6RMv10002195m
XeXenL6RMv10002198m
XeXenL6RMv10002200m
XeXenL6RMv10002204m
XeXenL6RMv10002205m
XeXenL6RMv10002206m
XeXenL6RMv10002207m
XeXenL6RMv10002208m
XeXenL6RMv10002209m
XeXenL6RMv10002212m
XeXenL6RMv10002214m
XeXenL6RMv10002216m
XeXenL6RMv10002217m
XeXenL6RMv10002218m
XeXenL6RMv10002219m
XeXenL6RMv10002226m
XeXenL6RMv10002230m
XeXenL6RMv10002231m
XeXenL6RMv10002232m
XeXenL6RMv10002233m
XeXenL6RMv10002235m
XeXenL6RMv10002236m
XeXenL6RMv10002237m
XeXenL6RMv10002238m
XeXenL6RMv10002239m
XeXenL6RMv10002240m
XeXenL6RMv10002241m
XeXenL6RMv10002242m
XeXenL6RMv10002244m
XeXenL6RMv10002246m
XeXenL6RMv10002247m
XeXenL6RMv10002249m
XeXenL6RMv10002250m
XeXenL6RMv10002256m
XeXenL6RMv10002257m
XeXenL6RMv10002259m
XeXenL6RMv10002260m
XeXenL6RMv10002261m
XeXenL6RMv10002262m
XeXenL6RMv10002263m
XeXenL6RMv10002264m
XeXenL6RMv10002265m
XeXenL6RMv10002273m
XeXenL6RMv10002277m
XeXenL6RMv10002282m
XeXenL6RMv10002283m
XeXenL6RMv10002284m
XeXenL6RMv10002287m
XeXenL6RMv10002288m
XeXenL6RMv10002289m
XeXenL6RMv10002291m
XeXenL6RMv10002293m
XeXenL6RMv10002295m
XeXenL6RMv10002296m
XeXenL6RMv10002299m
XeXenL6RMv10002303m
XeXenL6RMv10002304m
XeXenL6RMv10002306m
XeXenL6RMv10002307m
XeXenL6RMv10002310m
XeXenL6RMv10002312m
XeXenL6RMv10002313m
XeXenL6RMv10002314m
XeXenL6RMv10002316m
XeXenL6RMv10002317m
XeXenL6RMv10002318m
XeXenL6RMv10002319m
XeXenL6RMv10002322m
XeXenL6RMv10002323m
XeXenL6RMv10002330m
XeXenL6RMv10002332m
XeXenL6RMv10002333m
XeXenL6RMv10002335m
XeXenL6RMv10002336m
XeXenL6RMv10002337m
XeXenL6RMv10002339m
XeXenL6RMv10002343m
XeXenL6RMv10002345m
XeXenL6RMv10002346m
XeXenL6RMv10002350m
XeXenL6RMv10002351m
XeXenL6RMv10002352m
XeXenL6RMv10002353m
XeXenL6RMv10002354m
XeXenL6RMv10002361m
XeXenL6RMv10002362m
XeXenL6RMv10002364m
XeXenL6RMv10002366m
XeXenL6RMv10002367m
XeXenL6RMv10002368m
XeXenL6RMv10002370m
XeXenL6RMv10002372m
XeXenL6RMv10002374m
XeXenL6RMv10002375m
XeXenL6RMv10002376m
XeXenL6RMv10002377m
XeXenL6RMv10002378m
XeXenL6RMv10002379m
XeXenL6RMv10002384m
XeXenL6RMv10002385m
XeXenL6RMv10002390m
XeXenL6RMv10002391m
XeXenL6RMv10002392m
XeXenL6RMv10002393m
XeXenL6RMv10002394m
XeXenL6RMv10002395m
XeXenL6RMv10002396m
XeXenL6RMv10002399m
XeXenL6RMv10002403m
XeXenL6RMv10002404m
XeXenL6RMv10002410m
XeXenL6RMv10002412m
XeXenL6RMv10002415m
XeXenL6RMv10002416m
XeXenL6RMv10002417m
XeXenL6RMv10002418m
XeXenL6RMv10002422m
XeXenL6RMv10002424m
XeXenL6RMv10002425m
XeXenL6RMv10002431m
XeXenL6RMv10002433m
XeXenL6RMv10002434m
XeXenL6RMv10002436m
XeXenL6RMv10002439m
XeXenL6RMv10002440m
XeXenL6RMv10002442m
XeXenL6RMv10002443m
XeXenL6RMv10002445m
XeXenL6RMv10002446m
XeXenL6RMv10002447m
XeXenL6RMv10002448m
XeXenL6RMv10002450m
XeXenL6RMv10002451m
XeXenL6RMv10002454m
XeXenL6RMv10002455m
XeXenL6RMv10002456m
XeXenL6RMv10002457m
XeXenL6RMv10002458m
XeXenL6RMv10002460m
XeXenL6RMv10002461m
XeXenL6RMv10002462m
XeXenL6RMv10002465m
XeXenL6RMv10002466m
XeXenL6RMv10002467m
XeXenL6RMv10002469m
XeXenL6RMv10002470m
XeXenL6RMv10002471m
XeXenL6RMv10002472m
XeXenL6RMv10002473m
XeXenL6RMv10002474m
XeXenL6RMv10002476m
XeXenL6RMv10002478m
XeXenL6RMv10002479m
XeXenL6RMv10002480m
XeXenL6RMv10002485m
XeXenL6RMv10002486m
XeXenL6RMv10002488m
XeXenL6RMv10002489m
XeXenL6RMv10002490m
XeXenL6RMv10002491m
XeXenL6RMv10002492m
XeXenL6RMv10002493m
XeXenL6RMv10002494m
XeXenL6RMv10002495m
XeXenL6RMv10002505m
XeXenL6RMv10002506m
XeXenL6RMv10002507m
XeXenL6RMv10002510m
XeXenL6RMv10002511m
XeXenL6RMv10002512m
XeXenL6RMv10002513m
XeXenL6RMv10002514m
XeXenL6RMv10002515m
XeXenL6RMv10002516m
XeXenL6RMv10002517m
XeXenL6RMv10002522m
XeXenL6RMv10002524m
XeXenL6RMv10002525m
XeXenL6RMv10002526m
XeXenL6RMv10002527m
XeXenL6RMv10002530m
XeXenL6RMv10002531m
XeXenL6RMv10002533m
XeXenL6RMv10002534m
XeXenL6RMv10002535m
XeXenL6RMv10002536m
XeXenL6RMv10002542m
XeXenL6RMv10002543m
XeXenL6RMv10002544m
XeXenL6RMv10002545m
XeXenL6RMv10002546m
XeXenL6RMv10002547m
XeXenL6RMv10002549m
XeXenL6RMv10002552m
XeXenL6RMv10002565m
XeXenL6RMv10002566m
XeXenL6RMv10002567m
XeXenL6RMv10002571m
XeXenL6RMv10002574m
XeXenL6RMv10002575m
XeXenL6RMv10002576m
XeXenL6RMv10002577m
XeXenL6RMv10002583m
XeXenL6RMv10002584m
XeXenL6RMv10002586m
XeXenL6RMv10002587m
XeXenL6RMv10002588m
XeXenL6RMv10002592m
XeXenL6RMv10002595m
XeXenL6RMv10002596m
XeXenL6RMv10002598m
XeXenL6RMv10002599m
XeXenL6RMv10002601m
XeXenL6RMv10002602m
XeXenL6RMv10002604m
XeXenL6RMv10002605m
XeXenL6RMv10002606m
XeXenL6RMv10002607m
XeXenL6RMv10002608m
XeXenL6RMv10002610m
XeXenL6RMv10002611m
XeXenL6RMv10002614m
XeXenL6RMv10002615m
XeXenL6RMv10002616m
XeXenL6RMv10002617m
XeXenL6RMv10002618m
XeXenL6RMv10002619m
XeXenL6RMv10002631m
XeXenL6RMv10002633m
XeXenL6RMv10002634m
XeXenL6RMv10002636m
XeXenL6RMv10002637m
XeXenL6RMv10002638m
XeXenL6RMv10002639m
XeXenL6RMv10002640m
XeXenL6RMv10002642m
XeXenL6RMv10002643m
XeXenL6RMv10002644m
XeXenL6RMv10002645m
XeXenL6RMv10002646m
XeXenL6RMv10002647m
XeXenL6RMv10002648m
XeXenL6RMv10002649m
XeXenL6RMv10002650m
XeXenL6RMv10002651m
XeXenL6RMv10002653m
XeXenL6RMv10002654m
XeXenL6RMv10002655m
XeXenL6RMv10002656m
XeXenL6RMv10002658m
XeXenL6RMv10002660m
XeXenL6RMv10002662m
XeXenL6RMv10002663m
XeXenL6RMv10002665m
XeXenL6RMv10002669m
XeXenL6RMv10002670m
XeXenL6RMv10002671m
XeXenL6RMv10002677m
XeXenL6RMv10002678m
XeXenL6RMv10002686m
XeXenL6RMv10002687m
XeXenL6RMv10002688m
XeXenL6RMv10002691m
XeXenL6RMv10002692m
XeXenL6RMv10002695m
XeXenL6RMv10002696m
XeXenL6RMv10002697m
XeXenL6RMv10002701m
XeXenL6RMv10002702m
XeXenL6RMv10002703m
XeXenL6RMv10002704m
XeXenL6RMv10002707m
XeXenL6RMv10002708m
XeXenL6RMv10002714m
XeXenL6RMv10002719m
XeXenL6RMv10002720m
XeXenL6RMv10002723m
XeXenL6RMv10002726m
XeXenL6RMv10002727m
XeXenL6RMv10002728m
XeXenL6RMv10002729m
XeXenL6RMv10002731m
XeXenL6RMv10002733m
XeXenL6RMv10002736m
XeXenL6RMv10002737m
XeXenL6RMv10002739m
XeXenL6RMv10002740m
XeXenL6RMv10002741m
XeXenL6RMv10002743m
XeXenL6RMv10002744m
XeXenL6RMv10002745m
XeXenL6RMv10002748m
XeXenL6RMv10002763m
XeXenL6RMv10002764m
XeXenL6RMv10002765m
XeXenL6RMv10002767m
XeXenL6RMv10002768m
XeXenL6RMv10002769m
XeXenL6RMv10002773m
XeXenL6RMv10002776m
XeXenL6RMv10002777m
XeXenL6RMv10002779m
XeXenL6RMv10002780m
XeXenL6RMv10002783m
XeXenL6RMv10002784m
XeXenL6RMv10002785m
XeXenL6RMv10002786m
XeXenL6RMv10002787m
XeXenL6RMv10002789m
XeXenL6RMv10002792m
XeXenL6RMv10002799m
XeXenL6RMv10002804m
XeXenL6RMv10002810m
XeXenL6RMv10002812m
XeXenL6RMv10002815m
XeXenL6RMv10002816m
XeXenL6RMv10002817m
XeXenL6RMv10002818m
XeXenL6RMv10002819m
XeXenL6RMv10002820m
XeXenL6RMv10002830m
XeXenL6RMv10002831m
XeXenL6RMv10002833m
XeXenL6RMv10002843m
XeXenL6RMv10002844m
XeXenL6RMv10002846m
XeXenL6RMv10002851m
XeXenL6RMv10002855m
XeXenL6RMv10002856m
XeXenL6RMv10002857m
XeXenL6RMv10002859m
XeXenL6RMv10002861m
XeXenL6RMv10002862m
XeXenL6RMv10002867m
XeXenL6RMv10002868m
XeXenL6RMv10002869m
XeXenL6RMv10002870m
XeXenL6RMv10002871m
XeXenL6RMv10002872m
XeXenL6RMv10002873m
XeXenL6RMv10002875m
XeXenL6RMv10002876m
XeXenL6RMv10002877m
XeXenL6RMv10002880m
XeXenL6RMv10002881m
XeXenL6RMv10002888m
XeXenL6RMv10002889m
XeXenL6RMv10002890m
XeXenL6RMv10002891m
XeXenL6RMv10002892m
XeXenL6RMv10002893m
XeXenL6RMv10002894m
XeXenL6RMv10002896m
XeXenL6RMv10002899m
XeXenL6RMv10002904m
XeXenL6RMv10002910m
XeXenL6RMv10002911m
XeXenL6RMv10002913m
XeXenL6RMv10002916m
XeXenL6RMv10002917m
XeXenL6RMv10002928m
XeXenL6RMv10002945m
XeXenL6RMv10002946m
XeXenL6RMv10002948m
XeXenL6RMv10002951m
XeXenL6RMv10002953m
XeXenL6RMv10002954m
XeXenL6RMv10002955m
XeXenL6RMv10002957m
XeXenL6RMv10002958m
XeXenL6RMv10002959m
XeXenL6RMv10002962m
XeXenL6RMv10002963m
XeXenL6RMv10002964m
XeXenL6RMv10002966m
XeXenL6RMv10002967m
XeXenL6RMv10002968m
XeXenL6RMv10002969m
XeXenL6RMv10002972m
XeXenL6RMv10002973m
XeXenL6RMv10002975m
XeXenL6RMv10002976m
XeXenL6RMv10002977m
XeXenL6RMv10002979m
XeXenL6RMv10002980m
XeXenL6RMv10002981m
XeXenL6RMv10002983m
XeXenL6RMv10002986m
XeXenL6RMv10002987m
XeXenL6RMv10002990m
XeXenL6RMv10002991m
XeXenL6RMv10002992m
XeXenL6RMv10002993m
XeXenL6RMv10002994m
XeXenL6RMv10002995m
XeXenL6RMv10002997m
XeXenL6RMv10002998m
XeXenL6RMv10002999m
XeXenL6RMv10003000m
XeXenL6RMv10003003m
XeXenL6RMv10003006m
XeXenL6RMv10003007m
XeXenL6RMv10003008m
XeXenL6RMv10003009m
XeXenL6RMv10003010m
XeXenL6RMv10003011m
XeXenL6RMv10003012m
XeXenL6RMv10003013m
XeXenL6RMv10003014m
XeXenL6RMv10003015m
XeXenL6RMv10003017m
XeXenL6RMv10003025m
XeXenL6RMv10003027m
XeXenL6RMv10003033m
XeXenL6RMv10003034m
XeXenL6RMv10003038m
XeXenL6RMv10003041m
XeXenL6RMv10003047m
XeXenL6RMv10003049m
XeXenL6RMv10003051m
XeXenL6RMv10003052m
XeXenL6RMv10003053m
XeXenL6RMv10003055m
XeXenL6RMv10003058m
XeXenL6RMv10003059m
XeXenL6RMv10003060m
XeXenL6RMv10003063m
XeXenL6RMv10003071m
XeXenL6RMv10003074m
XeXenL6RMv10003078m
XeXenL6RMv10003079m
XeXenL6RMv10003080m
XeXenL6RMv10003081m
XeXenL6RMv10003084m
XeXenL6RMv10003085m
XeXenL6RMv10003088m
XeXenL6RMv10003089m
XeXenL6RMv10003090m
XeXenL6RMv10003094m
XeXenL6RMv10003097m
XeXenL6RMv10003098m
XeXenL6RMv10003100m
XeXenL6RMv10003101m
XeXenL6RMv10003102m
XeXenL6RMv10003103m
XeXenL6RMv10003105m
XeXenL6RMv10003106m
XeXenL6RMv10003109m
XeXenL6RMv10003110m
XeXenL6RMv10003111m
XeXenL6RMv10003114m
XeXenL6RMv10003117m
XeXenL6RMv10003118m
XeXenL6RMv10003119m
XeXenL6RMv10003120m
XeXenL6RMv10003123m
XeXenL6RMv10003125m
XeXenL6RMv10003126m
XeXenL6RMv10003127m
XeXenL6RMv10003129m
XeXenL6RMv10003130m
XeXenL6RMv10003134m
XeXenL6RMv10003135m
XeXenL6RMv10003136m
XeXenL6RMv10003137m
XeXenL6RMv10003138m
XeXenL6RMv10003142m
XeXenL6RMv10003146m
XeXenL6RMv10003148m
XeXenL6RMv10003150m
XeXenL6RMv10003152m
XeXenL6RMv10003153m
XeXenL6RMv10003155m
XeXenL6RMv10003159m
XeXenL6RMv10003160m
XeXenL6RMv10003161m
XeXenL6RMv10003162m
XeXenL6RMv10003163m
XeXenL6RMv10003165m
XeXenL6RMv10003168m
XeXenL6RMv10003179m
XeXenL6RMv10003181m
XeXenL6RMv10003184m
XeXenL6RMv10003185m
XeXenL6RMv10003186m
XeXenL6RMv10003189m
XeXenL6RMv10003191m
XeXenL6RMv10003194m
XeXenL6RMv10003195m
XeXenL6RMv10003196m
XeXenL6RMv10003200m
XeXenL6RMv10003202m
XeXenL6RMv10003203m
XeXenL6RMv10003205m
XeXenL6RMv10003213m
XeXenL6RMv10003216m
XeXenL6RMv10003218m
XeXenL6RMv10003219m
XeXenL6RMv10003220m
XeXenL6RMv10003221m
XeXenL6RMv10003222m
XeXenL6RMv10003223m
XeXenL6RMv10003227m
XeXenL6RMv10003228m
XeXenL6RMv10003229m
XeXenL6RMv10003230m
XeXenL6RMv10003231m
XeXenL6RMv10003237m
XeXenL6RMv10003238m
XeXenL6RMv10003239m
XeXenL6RMv10003241m
XeXenL6RMv10003242m
XeXenL6RMv10003243m
XeXenL6RMv10003244m
XeXenL6RMv10003245m
XeXenL6RMv10003246m
XeXenL6RMv10003247m
XeXenL6RMv10003248m
XeXenL6RMv10003249m
XeXenL6RMv10003250m
XeXenL6RMv10003251m
XeXenL6RMv10003256m
XeXenL6RMv10003257m
XeXenL6RMv10003258m
XeXenL6RMv10003259m
XeXenL6RMv10003260m
XeXenL6RMv10003261m
XeXenL6RMv10003262m
XeXenL6RMv10003263m
XeXenL6RMv10003264m
XeXenL6RMv10003265m
XeXenL6RMv10003266m
XeXenL6RMv10003268m
XeXenL6RMv10003269m
XeXenL6RMv10003270m
XeXenL6RMv10003271m
XeXenL6RMv10003274m
XeXenL6RMv10003276m
XeXenL6RMv10003279m
XeXenL6RMv10003281m
XeXenL6RMv10003282m
XeXenL6RMv10003283m
XeXenL6RMv10003284m
XeXenL6RMv10003285m
XeXenL6RMv10003291m
XeXenL6RMv10003293m
XeXenL6RMv10003301m
XeXenL6RMv10003303m
XeXenL6RMv10003307m
XeXenL6RMv10003308m
XeXenL6RMv10003310m
XeXenL6RMv10003311m
XeXenL6RMv10003313m
XeXenL6RMv10003317m
XeXenL6RMv10003318m
XeXenL6RMv10003319m
XeXenL6RMv10003321m
XeXenL6RMv10003323m
XeXenL6RMv10003324m
XeXenL6RMv10003326m
XeXenL6RMv10003329m
XeXenL6RMv10003333m
XeXenL6RMv10003335m
XeXenL6RMv10003336m
XeXenL6RMv10003337m
XeXenL6RMv10003338m
XeXenL6RMv10003339m
XeXenL6RMv10003342m
XeXenL6RMv10003343m
XeXenL6RMv10003345m
XeXenL6RMv10003352m
XeXenL6RMv10003356m
XeXenL6RMv10003357m
XeXenL6RMv10003360m
XeXenL6RMv10003362m
XeXenL6RMv10003363m
XeXenL6RMv10003365m
XeXenL6RMv10003368m
XeXenL6RMv10003369m
XeXenL6RMv10003371m
XeXenL6RMv10003372m
XeXenL6RMv10003376m
XeXenL6RMv10003377m
XeXenL6RMv10003379m
XeXenL6RMv10003380m
XeXenL6RMv10003386m
XeXenL6RMv10003387m
XeXenL6RMv10003388m
XeXenL6RMv10003389m
XeXenL6RMv10003390m
XeXenL6RMv10003391m
XeXenL6RMv10003394m
XeXenL6RMv10003397m
XeXenL6RMv10003401m
XeXenL6RMv10003402m
XeXenL6RMv10003408m
XeXenL6RMv10003409m
XeXenL6RMv10003411m
XeXenL6RMv10003412m
XeXenL6RMv10003415m
XeXenL6RMv10003416m
XeXenL6RMv10003418m
XeXenL6RMv10003420m
XeXenL6RMv10003421m
XeXenL6RMv10003422m
XeXenL6RMv10003423m
XeXenL6RMv10003424m
XeXenL6RMv10003426m
XeXenL6RMv10003427m
XeXenL6RMv10003429m
XeXenL6RMv10003433m
XeXenL6RMv10003434m
XeXenL6RMv10003435m
XeXenL6RMv10003438m
XeXenL6RMv10003440m
XeXenL6RMv10003443m
XeXenL6RMv10003447m
XeXenL6RMv10003455m
XeXenL6RMv10003456m
XeXenL6RMv10003458m
XeXenL6RMv10003461m
XeXenL6RMv10003462m
XeXenL6RMv10003464m
XeXenL6RMv10003465m
XeXenL6RMv10003467m
XeXenL6RMv10003468m
XeXenL6RMv10003469m
XeXenL6RMv10003472m
XeXenL6RMv10003474m
XeXenL6RMv10003491m
XeXenL6RMv10003494m
XeXenL6RMv10003495m
XeXenL6RMv10003496m
XeXenL6RMv10003497m
XeXenL6RMv10003498m
XeXenL6RMv10003499m
XeXenL6RMv10003500m
XeXenL6RMv10003501m
XeXenL6RMv10003502m
XeXenL6RMv10003503m
XeXenL6RMv10003508m
XeXenL6RMv10003509m
XeXenL6RMv10003511m
XeXenL6RMv10003513m
XeXenL6RMv10003514m
XeXenL6RMv10003515m
XeXenL6RMv10003516m
XeXenL6RMv10003519m
XeXenL6RMv10003520m
XeXenL6RMv10003521m
XeXenL6RMv10003524m
XeXenL6RMv10003525m
XeXenL6RMv10003531m
XeXenL6RMv10003532m
XeXenL6RMv10003533m
XeXenL6RMv10003535m
XeXenL6RMv10003536m
XeXenL6RMv10003537m
XeXenL6RMv10003541m
XeXenL6RMv10003542m
XeXenL6RMv10003543m
XeXenL6RMv10003544m
XeXenL6RMv10003546m
XeXenL6RMv10003547m
XeXenL6RMv10003548m
XeXenL6RMv10003551m
XeXenL6RMv10003554m
XeXenL6RMv10003555m
XeXenL6RMv10003557m
XeXenL6RMv10003558m
XeXenL6RMv10003561m
XeXenL6RMv10003562m
XeXenL6RMv10003565m
XeXenL6RMv10003566m
XeXenL6RMv10003568m
XeXenL6RMv10003569m
XeXenL6RMv10003571m
XeXenL6RMv10003572m
XeXenL6RMv10003579m
XeXenL6RMv10003583m
XeXenL6RMv10003589m
XeXenL6RMv10003590m
XeXenL6RMv10003593m
XeXenL6RMv10003599m
XeXenL6RMv10003600m
XeXenL6RMv10003601m
XeXenL6RMv10003603m
XeXenL6RMv10003607m
XeXenL6RMv10003608m
XeXenL6RMv10003609m
XeXenL6RMv10003610m
XeXenL6RMv10003613m
XeXenL6RMv10003614m
XeXenL6RMv10003615m
XeXenL6RMv10003618m
XeXenL6RMv10003619m
XeXenL6RMv10003621m
XeXenL6RMv10003622m
XeXenL6RMv10003623m
XeXenL6RMv10003624m
XeXenL6RMv10003625m
XeXenL6RMv10003629m
XeXenL6RMv10003632m
XeXenL6RMv10003638m
XeXenL6RMv10003642m
XeXenL6RMv10003643m
XeXenL6RMv10003644m
XeXenL6RMv10003645m
XeXenL6RMv10003649m
XeXenL6RMv10003650m
XeXenL6RMv10003651m
XeXenL6RMv10003660m
XeXenL6RMv10003661m
XeXenL6RMv10003662m
XeXenL6RMv10003664m
XeXenL6RMv10003665m
XeXenL6RMv10003666m
XeXenL6RMv10003669m
XeXenL6RMv10003670m
XeXenL6RMv10003671m
XeXenL6RMv10003672m
XeXenL6RMv10003673m
XeXenL6RMv10003676m
XeXenL6RMv10003678m
XeXenL6RMv10003679m
XeXenL6RMv10003681m
XeXenL6RMv10003682m
XeXenL6RMv10003685m
XeXenL6RMv10003686m
XeXenL6RMv10003687m
XeXenL6RMv10003688m
XeXenL6RMv10003692m
XeXenL6RMv10003697m
XeXenL6RMv10003699m
XeXenL6RMv10003700m
XeXenL6RMv10003710m
XeXenL6RMv10003711m
XeXenL6RMv10003715m
XeXenL6RMv10003725m
XeXenL6RMv10003726m
XeXenL6RMv10003727m
XeXenL6RMv10003729m
XeXenL6RMv10003735m
XeXenL6RMv10003738m
XeXenL6RMv10003740m
XeXenL6RMv10003742m
XeXenL6RMv10003743m
XeXenL6RMv10003746m
XeXenL6RMv10003747m
XeXenL6RMv10003748m
XeXenL6RMv10003749m
XeXenL6RMv10003750m
XeXenL6RMv10003753m
XeXenL6RMv10003757m
XeXenL6RMv10003760m
XeXenL6RMv10003761m
XeXenL6RMv10003763m
XeXenL6RMv10003767m
XeXenL6RMv10003768m
XeXenL6RMv10003769m
XeXenL6RMv10003772m
XeXenL6RMv10003775m
XeXenL6RMv10003777m
XeXenL6RMv10003788m
XeXenL6RMv10003789m
XeXenL6RMv10003790m
XeXenL6RMv10003791m
XeXenL6RMv10003792m
XeXenL6RMv10003793m
XeXenL6RMv10003795m
XeXenL6RMv10003796m
XeXenL6RMv10003798m
XeXenL6RMv10003799m
XeXenL6RMv10003801m
XeXenL6RMv10003802m
XeXenL6RMv10003812m
XeXenL6RMv10003814m
XeXenL6RMv10003817m
XeXenL6RMv10003819m
XeXenL6RMv10003821m
XeXenL6RMv10003822m
XeXenL6RMv10003823m
XeXenL6RMv10003825m
XeXenL6RMv10003826m
XeXenL6RMv10003827m
XeXenL6RMv10003828m
XeXenL6RMv10003829m
XeXenL6RMv10003830m
XeXenL6RMv10003833m
XeXenL6RMv10003834m
XeXenL6RMv10003835m
XeXenL6RMv10003837m
XeXenL6RMv10003839m
XeXenL6RMv10003840m
XeXenL6RMv10003841m
XeXenL6RMv10003842m
XeXenL6RMv10003843m
XeXenL6RMv10003844m
XeXenL6RMv10003845m
XeXenL6RMv10003849m
XeXenL6RMv10003851m
XeXenL6RMv10003854m
XeXenL6RMv10003865m
XeXenL6RMv10003866m
XeXenL6RMv10003867m
XeXenL6RMv10003876m
XeXenL6RMv10003877m
XeXenL6RMv10003880m
XeXenL6RMv10003886m
XeXenL6RMv10003887m
XeXenL6RMv10003888m
XeXenL6RMv10003889m
XeXenL6RMv10003891m
XeXenL6RMv10003892m
XeXenL6RMv10003893m
XeXenL6RMv10003894m
XeXenL6RMv10003895m
XeXenL6RMv10003896m
XeXenL6RMv10003897m
XeXenL6RMv10003898m
XeXenL6RMv10003899m
XeXenL6RMv10003900m
XeXenL6RMv10003901m
XeXenL6RMv10003902m
XeXenL6RMv10003903m
XeXenL6RMv10003906m
XeXenL6RMv10003908m
XeXenL6RMv10003909m
XeXenL6RMv10003910m
XeXenL6RMv10003914m
XeXenL6RMv10003915m
XeXenL6RMv10003916m
XeXenL6RMv10003917m
XeXenL6RMv10003919m
XeXenL6RMv10003920m
XeXenL6RMv10003923m
XeXenL6RMv10003926m
XeXenL6RMv10003928m
XeXenL6RMv10003931m
XeXenL6RMv10003933m
XeXenL6RMv10003935m
XeXenL6RMv10003936m
XeXenL6RMv10003937m
XeXenL6RMv10003940m
XeXenL6RMv10003946m
XeXenL6RMv10003947m
XeXenL6RMv10003948m
XeXenL6RMv10003951m
XeXenL6RMv10003953m
XeXenL6RMv10003954m
XeXenL6RMv10003959m
XeXenL6RMv10003961m
XeXenL6RMv10003962m
XeXenL6RMv10003965m
XeXenL6RMv10003973m
XeXenL6RMv10003974m
XeXenL6RMv10003976m
XeXenL6RMv10003978m
XeXenL6RMv10003980m
XeXenL6RMv10003983m
XeXenL6RMv10003984m
XeXenL6RMv10003985m
XeXenL6RMv10003987m
XeXenL6RMv10003988m
XeXenL6RMv10003989m
XeXenL6RMv10003990m
XeXenL6RMv10003991m
XeXenL6RMv10003992m
XeXenL6RMv10003995m
XeXenL6RMv10003999m
XeXenL6RMv10004006m
XeXenL6RMv10004008m
XeXenL6RMv10004011m
XeXenL6RMv10004013m
XeXenL6RMv10004015m
XeXenL6RMv10004016m
XeXenL6RMv10004017m
XeXenL6RMv10004018m
XeXenL6RMv10004019m
XeXenL6RMv10004020m
XeXenL6RMv10004023m
XeXenL6RMv10004025m
XeXenL6RMv10004026m
XeXenL6RMv10004027m
XeXenL6RMv10004028m
XeXenL6RMv10004029m
XeXenL6RMv10004032m
XeXenL6RMv10004034m
XeXenL6RMv10004036m
XeXenL6RMv10004039m
XeXenL6RMv10004040m
XeXenL6RMv10004041m
XeXenL6RMv10004042m
XeXenL6RMv10004043m
XeXenL6RMv10004049m
XeXenL6RMv10004051m
XeXenL6RMv10004053m
XeXenL6RMv10004055m
XeXenL6RMv10004059m
[truncated: 25,786 more rows]

## Sheet: Xenopus tropicalis
ENSXETG00000000002
ENSXETG00000000003
ENSXETG00000000007
ENSXETG00000000009
ENSXETG00000000011
ENSXETG00000000013
ENSXETG00000000014
ENSXETG00000000021
ENSXETG00000000022
ENSXETG00000000026
ENSXETG00000000029
ENSXETG00000000035
ENSXETG00000000036
ENSXETG00000000037
ENSXETG00000000038
ENSXETG00000000039
ENSXETG00000000040
ENSXETG00000000042
ENSXETG00000000048
ENSXETG00000000049
ENSXETG00000000050
ENSXETG00000000051
ENSXETG00000000053
ENSXETG00000000056
ENSXETG00000000057
ENSXETG00000000060
ENSXETG00000000061
ENSXETG00000000062
ENSXETG00000000066
ENSXETG00000000067
ENSXETG00000000068
ENSXETG00000000070
ENSXETG00000000072
ENSXETG00000000073
ENSXETG00000000074
ENSXETG00000000076
ENSXETG00000000078
ENSXETG00000000081
ENSXETG00000000083
ENSXETG00000000087
ENSXETG00000000088
ENSXETG00000000089
ENSXETG00000000091
ENSXETG00000000101
ENSXETG00000000104
ENSXETG00000000109
ENSXETG00000000110
ENSXETG00000000114
ENSXETG00000000116
ENSXETG00000000117
ENSXETG00000000118
ENSXETG00000000121
ENSXETG00000000129
ENSXETG00000000130
ENSXETG00000000132
ENSXETG00000000135
ENSXETG00000000137
ENSXETG00000000138
ENSXETG00000000140
ENSXETG00000000142
ENSXETG00000000143
ENSXETG00000000147
ENSXETG00000000150
ENSXETG00000000151
ENSXETG00000000152
ENSXETG00000000154
ENSXETG00000000155
ENSXETG00000000156
ENSXETG00000000157
ENSXETG00000000161
ENSXETG00000000170
ENSXETG00000000172
ENSXETG00000000183
ENSXETG00000000185
ENSXETG00000000187
ENSXETG00000000190
ENSXETG00000000198
ENSXETG00000000199
ENSXETG00000000201
ENSXETG00000000204
ENSXETG00000000210
ENSXETG00000000213
ENSXETG00000000215
ENSXETG00000000216
ENSXETG00000000221
ENSXETG00000000228
ENSXETG00000000231
ENSXETG00000000232
ENSXETG00000000233
ENSXETG00000000237
ENSXETG00000000244
ENSXETG00000000246
ENSXETG00000000247
ENSXETG00000000251
ENSXETG00000000253
ENSXETG00000000254
ENSXETG00000000256
ENSXETG00000000260
ENSXETG00000000261
ENSXETG00000000264
ENSXETG00000000265
ENSXETG00000000267
ENSXETG00000000279
ENSXETG00000000286
ENSXETG00000000287
ENSXETG00000000289
ENSXETG00000000290
ENSXETG00000000292
ENSXETG00000000293
ENSXETG00000000295
ENSXETG00000000296
ENSXETG00000000298
ENSXETG00000000301
ENSXETG00000000302
ENSXETG00000000304
ENSXETG00000000305
ENSXETG00000000307
ENSXETG00000000310
ENSXETG00000000311
ENSXETG00000000312
ENSXETG00000000314
ENSXETG00000000316
ENSXETG00000000318
ENSXETG00000000320
ENSXETG00000000321
ENSXETG00000000325
ENSXETG00000000326
ENSXETG00000000331
ENSXETG00000000332
ENSXETG00000000333
ENSXETG00000000334
ENSXETG00000000335
ENSXETG00000000337
ENSXETG00000000338
ENSXETG00000000340
ENSXETG00000000341
ENSXETG00000000342
ENSXETG00000000343
ENSXETG00000000345
ENSXETG00000000346
ENSXETG00000000349
ENSXETG00000000351
ENSXETG00000000352
ENSXETG00000000355
ENSXETG00000000359
ENSXETG00000000363
ENSXETG00000000364
ENSXETG00000000365
ENSXETG00000000367
ENSXETG00000000368
ENSXETG00000000369
ENSXETG00000000372
ENSXETG00000000373
ENSXETG00000000375
ENSXETG00000000377
ENSXETG00000000380
ENSXETG00000000383
ENSXETG00000000384
ENSXETG00000000390
ENSXETG00000000392
ENSXETG00000000396
ENSXETG00000000401
ENSXETG00000000408
ENSXETG00000000409
ENSXETG00000000421
ENSXETG00000000422
ENSXETG00000000426
ENSXETG00000000438
ENSXETG00000000439
ENSXETG00000000442
ENSXETG00000000445
ENSXETG00000000446
ENSXETG00000000448
ENSXETG00000000451
ENSXETG00000000453
ENSXETG00000000454
ENSXETG00000000455
ENSXETG00000000456
ENSXETG00000000457
ENSXETG00000000459
ENSXETG00000000461
ENSXETG00000000462
ENSXETG00000000463
ENSXETG00000000465
ENSXETG00000000466
ENSXETG00000000469
ENSXETG00000000470
ENSXETG00000000472
ENSXETG00000000473
ENSXETG00000000477
ENSXETG00000000479
ENSXETG00000000480
ENSXETG00000000481
ENSXETG00000000484
ENSXETG00000000488
ENSXETG00000000496
ENSXETG00000000500
ENSXETG00000000502
ENSXETG00000000504
ENSXETG00000000509
ENSXETG00000000510
ENSXETG00000000511
ENSXETG00000000516
ENSXETG00000000517
ENSXETG00000000518
ENSXETG00000000522
ENSXETG00000000523
ENSXETG00000000524
ENSXETG00000000526
ENSXETG00000000527
ENSXETG00000000531
ENSXETG00000000532
ENSXETG00000000535
ENSXETG00000000542
ENSXETG00000000543
ENSXETG00000000546
ENSXETG00000000547
ENSXETG00000000548
ENSXETG00000000549
ENSXETG00000000566
ENSXETG00000000567
ENSXETG00000000572
ENSXETG00000000574
ENSXETG00000000577
ENSXETG00000000578
ENSXETG00000000579
ENSXETG00000000580
ENSXETG00000000581
ENSXETG00000000584
ENSXETG00000000585
ENSXETG00000000588
ENSXETG00000000589
ENSXETG00000000593
ENSXETG00000000595
ENSXETG00000000596
ENSXETG00000000598
ENSXETG00000000600
ENSXETG00000000607
ENSXETG00000000614
ENSXETG00000000619
ENSXETG00000000623
ENSXETG00000000624
ENSXETG00000000625
ENSXETG00000000627
ENSXETG00000000629
ENSXETG00000000635
ENSXETG00000000637
ENSXETG00000000638
ENSXETG00000000640
ENSXETG00000000641
ENSXETG00000000644
ENSXETG00000000645
ENSXETG00000000646
ENSXETG00000000653
ENSXETG00000000654
ENSXETG00000000655
ENSXETG00000000656
ENSXETG00000000658
ENSXETG00000000659
ENSXETG00000000664
ENSXETG00000000667
ENSXETG00000000668
ENSXETG00000000671
ENSXETG00000000679
ENSXETG00000000682
ENSXETG00000000683
ENSXETG00000000685
ENSXETG00000000688
ENSXETG00000000689
ENSXETG00000000690
ENSXETG00000000693
ENSXETG00000000694
ENSXETG00000000696
ENSXETG00000000697
ENSXETG00000000700
ENSXETG00000000701
ENSXETG00000000702
ENSXETG00000000703
ENSXETG00000000705
ENSXETG00000000706
ENSXETG00000000707
ENSXETG00000000708
ENSXETG00000000709
ENSXETG00000000715
ENSXETG00000000716
ENSXETG00000000717
ENSXETG00000000719
ENSXETG00000000720
ENSXETG00000000722
ENSXETG00000000723
ENSXETG00000000724
ENSXETG00000000725
ENSXETG00000000726
ENSXETG00000000727
ENSXETG00000000728
ENSXETG00000000729
ENSXETG00000000730
ENSXETG00000000731
ENSXETG00000000732
ENSXETG00000000734
ENSXETG00000000735
ENSXETG00000000736
ENSXETG00000000739
ENSXETG00000000740
ENSXETG00000000742
ENSXETG00000000745
ENSXETG00000000747
ENSXETG00000000748
ENSXETG00000000750
ENSXETG00000000752
ENSXETG00000000753
ENSXETG00000000754
ENSXETG00000000757
ENSXETG00000000758
ENSXETG00000000759
ENSXETG00000000760
ENSXETG00000000762
ENSXETG00000000763
ENSXETG00000000775
ENSXETG00000000777
ENSXETG00000000781
ENSXETG00000000782
ENSXETG00000000783
ENSXETG00000000786
ENSXETG00000000787
ENSXETG00000000793
ENSXETG00000000796
ENSXETG00000000797
ENSXETG00000000799
ENSXETG00000000800
ENSXETG00000000802
ENSXETG00000000804
ENSXETG00000000805
ENSXETG00000000807
ENSXETG00000000809
ENSXETG00000000810
ENSXETG00000000831
ENSXETG00000000835
ENSXETG00000000836
ENSXETG00000000838
ENSXETG00000000839
ENSXETG00000000840
ENSXETG00000000843
ENSXETG00000000845
ENSXETG00000000846
ENSXETG00000000847
ENSXETG00000000848
ENSXETG00000000849
ENSXETG00000000852
ENSXETG00000000853
ENSXETG00000000856
ENSXETG00000000864
ENSXETG00000000866
ENSXETG00000000869
ENSXETG00000000870
ENSXETG00000000873
ENSXETG00000000874
ENSXETG00000000878
ENSXETG00000000887
ENSXETG00000000896
ENSXETG00000000899
ENSXETG00000000901
ENSXETG00000000902
ENSXETG00000000903
ENSXETG00000000904
ENSXETG00000000907
ENSXETG00000000908
ENSXETG00000000909
ENSXETG00000000910
ENSXETG00000000914
ENSXETG00000000916
ENSXETG00000000918
ENSXETG00000000921
ENSXETG00000000923
ENSXETG00000000924
ENSXETG00000000925
ENSXETG00000000927
ENSXETG00000000930
ENSXETG00000000933
ENSXETG00000000935
ENSXETG00000000941
ENSXETG00000000947
ENSXETG00000000951
ENSXETG00000000953
ENSXETG00000000954
ENSXETG00000000956
ENSXETG00000000957
ENSXETG00000000960
ENSXETG00000000961
ENSXETG00000000962
ENSXETG00000000963
ENSXETG00000000967
ENSXETG00000000972
ENSXETG00000000973
ENSXETG00000000974
ENSXETG00000000976
ENSXETG00000000978
ENSXETG00000000979
ENSXETG00000000982
ENSXETG00000000983
ENSXETG00000000984
ENSXETG00000000985
ENSXETG00000000986
ENSXETG00000000987
ENSXETG00000000988
ENSXETG00000000991
ENSXETG00000000992
ENSXETG00000000994
ENSXETG00000000997
ENSXETG00000000998
ENSXETG00000001000
ENSXETG00000001001
ENSXETG00000001002
ENSXETG00000001003
ENSXETG00000001004
ENSXETG00000001008
ENSXETG00000001015
ENSXETG00000001016
ENSXETG00000001017
ENSXETG00000001021
ENSXETG00000001022
ENSXETG00000001023
ENSXETG00000001025
ENSXETG00000001027
ENSXETG00000001029
ENSXETG00000001030
ENSXETG00000001031
ENSXETG00000001033
ENSXETG00000001035
ENSXETG00000001036
ENSXETG00000001037
ENSXETG00000001046
ENSXETG00000001048
ENSXETG00000001053
ENSXETG00000001054
ENSXETG00000001057
ENSXETG00000001060
ENSXETG00000001061
ENSXETG00000001063
ENSXETG00000001064
ENSXETG00000001065
ENSXETG00000001066
ENSXETG00000001067
ENSXETG00000001068
ENSXETG00000001070
ENSXETG00000001071
ENSXETG00000001072
ENSXETG00000001073
ENSXETG00000001074
ENSXETG00000001078
ENSXETG00000001079
ENSXETG00000001081
ENSXETG00000001082
ENSXETG00000001083
ENSXETG00000001084
ENSXETG00000001085
ENSXETG00000001088
ENSXETG00000001093
ENSXETG00000001108
ENSXETG00000001109
ENSXETG00000001110
ENSXETG00000001112
ENSXETG00000001114
ENSXETG00000001116
ENSXETG00000001117
ENSXETG00000001118
ENSXETG00000001122
ENSXETG00000001133
ENSXETG00000001136
ENSXETG00000001141
ENSXETG00000001142
ENSXETG00000001143
ENSXETG00000001148
ENSXETG00000001152
ENSXETG00000001154
ENSXETG00000001165
ENSXETG00000001167
ENSXETG00000001170
ENSXETG00000001173
ENSXETG00000001175
ENSXETG00000001176
ENSXETG00000001177
ENSXETG00000001178
ENSXETG00000001179
ENSXETG00000001182
ENSXETG00000001183
ENSXETG00000001184
ENSXETG00000001185
ENSXETG00000001192
ENSXETG00000001195
ENSXETG00000001201
ENSXETG00000001202
ENSXETG00000001204
ENSXETG00000001207
ENSXETG00000001209
ENSXETG00000001210
ENSXETG00000001212
ENSXETG00000001215
ENSXETG00000001218
ENSXETG00000001220
ENSXETG00000001223
ENSXETG00000001225
ENSXETG00000001226
ENSXETG00000001229
ENSXETG00000001232
ENSXETG00000001233
ENSXETG00000001239
ENSXETG00000001240
ENSXETG00000001242
ENSXETG00000001243
ENSXETG00000001244
ENSXETG00000001245
ENSXETG00000001247
ENSXETG00000001249
ENSXETG00000001251
ENSXETG00000001252
ENSXETG00000001253
ENSXETG00000001255
ENSXETG00000001257
ENSXETG00000001258
ENSXETG00000001259
ENSXETG00000001262
ENSXETG00000001263
ENSXETG00000001266
ENSXETG00000001267
ENSXETG00000001269
ENSXETG00000001272
ENSXETG00000001273
ENSXETG00000001276
ENSXETG00000001281
ENSXETG00000001288
ENSXETG00000001289
ENSXETG00000001291
ENSXETG00000001293
ENSXETG00000001296
ENSXETG00000001299
ENSXETG00000001302
ENSXETG00000001304
ENSXETG00000001305
ENSXETG00000001307
ENSXETG00000001312
ENSXETG00000001314
ENSXETG00000001315
ENSXETG00000001319
ENSXETG00000001320
ENSXETG00000001321
ENSXETG00000001322
ENSXETG00000001323
ENSXETG00000001324
ENSXETG00000001331
ENSXETG00000001335
ENSXETG00000001336
ENSXETG00000001337
ENSXETG00000001340
ENSXETG00000001343
ENSXETG00000001344
ENSXETG00000001347
ENSXETG00000001352
ENSXETG00000001353
ENSXETG00000001355
ENSXETG00000001356
ENSXETG00000001364
ENSXETG00000001366
ENSXETG00000001368
ENSXETG00000001377
ENSXETG00000001379
ENSXETG00000001382
ENSXETG00000001383
ENSXETG00000001384
ENSXETG00000001388
ENSXETG00000001390
ENSXETG00000001391
ENSXETG00000001395
ENSXETG00000001397
ENSXETG00000001404
ENSXETG00000001405
ENSXETG00000001407
ENSXETG00000001408
ENSXETG00000001410
ENSXETG00000001412
ENSXETG00000001414
ENSXETG00000001415
ENSXETG00000001420
ENSXETG00000001426
ENSXETG00000001434
ENSXETG00000001437
ENSXETG00000001438
ENSXETG00000001439
ENSXETG00000001440
ENSXETG00000001441
ENSXETG00000001443
ENSXETG00000001445
ENSXETG00000001447
ENSXETG00000001448
ENSXETG00000001449
ENSXETG00000001452
ENSXETG00000001453
ENSXETG00000001455
ENSXETG00000001457
ENSXETG00000001461
ENSXETG00000001463
ENSXETG00000001464
ENSXETG00000001466
ENSXETG00000001467
ENSXETG00000001468
ENSXETG00000001469
ENSXETG00000001473
ENSXETG00000001474
ENSXETG00000001475
ENSXETG00000001478
ENSXETG00000001479
ENSXETG00000001480
ENSXETG00000001481
ENSXETG00000001482
ENSXETG00000001485
ENSXETG00000001486
ENSXETG00000001496
ENSXETG00000001499
ENSXETG00000001501
ENSXETG00000001502
ENSXETG00000001505
ENSXETG00000001509
ENSXETG00000001512
ENSXETG00000001517
ENSXETG00000001521
ENSXETG00000001525
ENSXETG00000001526
ENSXETG00000001527
ENSXETG00000001528
ENSXETG00000001531
ENSXETG00000001533
ENSXETG00000001534
ENSXETG00000001535
ENSXETG00000001537
ENSXETG00000001539
ENSXETG00000001540
ENSXETG00000001541
ENSXETG00000001542
ENSXETG00000001547
ENSXETG00000001552
ENSXETG00000001563
ENSXETG00000001564
ENSXETG00000001565
ENSXETG00000001566
ENSXETG00000001573
ENSXETG00000001582
ENSXETG00000001584
ENSXETG00000001585
ENSXETG00000001587
ENSXETG00000001588
ENSXETG00000001592
ENSXETG00000001593
ENSXETG00000001594
ENSXETG00000001595
ENSXETG00000001596
ENSXETG00000001609
ENSXETG00000001613
ENSXETG00000001616
ENSXETG00000001617
ENSXETG00000001618
ENSXETG00000001619
ENSXETG00000001621
ENSXETG00000001624
ENSXETG00000001625
ENSXETG00000001626
ENSXETG00000001630
ENSXETG00000001631
ENSXETG00000001633
ENSXETG00000001637
ENSXETG00000001638
ENSXETG00000001642
ENSXETG00000001644
ENSXETG00000001646
ENSXETG00000001647
ENSXETG00000001648
ENSXETG00000001650
ENSXETG00000001656
ENSXETG00000001660
ENSXETG00000001662
ENSXETG00000001666
ENSXETG00000001670
ENSXETG00000001671
ENSXETG00000001672
ENSXETG00000001673
ENSXETG00000001678
ENSXETG00000001682
ENSXETG00000001683
ENSXETG00000001688
ENSXETG00000001690
ENSXETG00000001696
ENSXETG00000001697
ENSXETG00000001698
ENSXETG00000001699
ENSXETG00000001701
ENSXETG00000001703
ENSXETG00000001704
ENSXETG00000001712
ENSXETG00000001714
ENSXETG00000001718
ENSXETG00000001719
ENSXETG00000001721
ENSXETG00000001724
ENSXETG00000001725
ENSXETG00000001727
ENSXETG00000001728
ENSXETG00000001729
ENSXETG00000001731
ENSXETG00000001732
ENSXETG00000001734
ENSXETG00000001738
ENSXETG00000001747
ENSXETG00000001749
ENSXETG00000001751
ENSXETG00000001752
ENSXETG00000001756
ENSXETG00000001760
ENSXETG00000001762
ENSXETG00000001763
ENSXETG00000001769
ENSXETG00000001770
ENSXETG00000001772
ENSXETG00000001773
ENSXETG00000001775
ENSXETG00000001776
ENSXETG00000001777
ENSXETG00000001778
ENSXETG00000001779
ENSXETG00000001780
ENSXETG00000001781
ENSXETG00000001783
ENSXETG00000001785
ENSXETG00000001791
ENSXETG00000001794
ENSXETG00000001795
ENSXETG00000001796
ENSXETG00000001799
ENSXETG00000001800
ENSXETG00000001801
ENSXETG00000001806
ENSXETG00000001808
ENSXETG00000001810
ENSXETG00000001812
ENSXETG00000001813
ENSXETG00000001816
ENSXETG00000001817
ENSXETG00000001818
ENSXETG00000001819
ENSXETG00000001820
ENSXETG00000001821
ENSXETG00000001822
ENSXETG00000001823
ENSXETG00000001824
ENSXETG00000001828
ENSXETG00000001829
ENSXETG00000001831
ENSXETG00000001833
ENSXETG00000001834
ENSXETG00000001835
ENSXETG00000001836
ENSXETG00000001837
ENSXETG00000001839
ENSXETG00000001840
ENSXETG00000001845
ENSXETG00000001846
ENSXETG00000001851
ENSXETG00000001854
ENSXETG00000001856
ENSXETG00000001859
ENSXETG00000001861
ENSXETG00000001865
ENSXETG00000001866
ENSXETG00000001868
ENSXETG00000001869
ENSXETG00000001873
ENSXETG00000001875
ENSXETG00000001879
ENSXETG00000001880
ENSXETG00000001882
ENSXETG00000001883
ENSXETG00000001884
ENSXETG00000001885
ENSXETG00000001886
ENSXETG00000001888
ENSXETG00000001890
ENSXETG00000001891
ENSXETG00000001892
ENSXETG00000001893
ENSXETG00000001902
ENSXETG00000001903
ENSXETG00000001905
ENSXETG00000001907
ENSXETG00000001908
ENSXETG00000001912
ENSXETG00000001913
ENSXETG00000001920
ENSXETG00000001921
ENSXETG00000001922
ENSXETG00000001924
ENSXETG00000001926
ENSXETG00000001927
ENSXETG00000001929
ENSXETG00000001931
ENSXETG00000001932
ENSXETG00000001933
ENSXETG00000001935
ENSXETG00000001936
ENSXETG00000001938
ENSXETG00000001940
ENSXETG00000001943
ENSXETG00000001949
ENSXETG00000001951
ENSXETG00000001952
ENSXETG00000001956
ENSXETG00000001958
ENSXETG00000001963
ENSXETG00000001966
ENSXETG00000001967
ENSXETG00000001972
ENSXETG00000001974
ENSXETG00000001979
ENSXETG00000001981
ENSXETG00000001982
ENSXETG00000001983
ENSXETG00000001985
ENSXETG00000001986
ENSXETG00000001994
ENSXETG00000001996
ENSXETG00000001997
ENSXETG00000001998
ENSXETG00000001999
ENSXETG00000002000
ENSXETG00000002001
ENSXETG00000002003
ENSXETG00000002004
ENSXETG00000002005
ENSXETG00000002006
ENSXETG00000002007
ENSXETG00000002008
ENSXETG00000002009
ENSXETG00000002013
ENSXETG00000002015
ENSXETG00000002017
ENSXETG00000002019
ENSXETG00000002023
ENSXETG00000002025
ENSXETG00000002026
ENSXETG00000002027
ENSXETG00000002028
ENSXETG00000002029
ENSXETG00000002030
ENSXETG00000002036
ENSXETG00000002038
ENSXETG00000002039
ENSXETG00000002041
ENSXETG00000002042
ENSXETG00000002043
ENSXETG00000002044
ENSXETG00000002045
ENSXETG00000002047
ENSXETG00000002049
ENSXETG00000002052
ENSXETG00000002058
ENSXETG00000002059
ENSXETG00000002061
ENSXETG00000002062
ENSXETG00000002064
ENSXETG00000002071
ENSXETG00000002072
ENSXETG00000002073
ENSXETG00000002074
ENSXETG00000002075
ENSXETG00000002076
ENSXETG00000002095
ENSXETG00000002098
ENSXETG00000002100
ENSXETG00000002101
ENSXETG00000002103
ENSXETG00000002104
ENSXETG00000002106
ENSXETG00000002108
ENSXETG00000002109
ENSXETG00000002112
ENSXETG00000002117
ENSXETG00000002119
ENSXETG00000002120
ENSXETG00000002122
ENSXETG00000002123
ENSXETG00000002126
ENSXETG00000002132
ENSXETG00000002137
ENSXETG00000002138
ENSXETG00000002141
ENSXETG00000002143
ENSXETG00000002145
ENSXETG00000002149
ENSXETG00000002150
ENSXETG00000002151
ENSXETG00000002153
ENSXETG00000002154
ENSXETG00000002157
ENSXETG00000002161
ENSXETG00000002162
ENSXETG00000002166
ENSXETG00000002167
ENSXETG00000002168
ENSXETG00000002171
ENSXETG00000002173
ENSXETG00000002195
ENSXETG00000002201
ENSXETG00000002204
ENSXETG00000002206
ENSXETG00000002208
ENSXETG00000002209
ENSXETG00000002210
ENSXETG00000002216
ENSXETG00000002217
ENSXETG00000002218
ENSXETG00000002222
ENSXETG00000002224
ENSXETG00000002225
ENSXETG00000002227
ENSXETG00000002228
ENSXETG00000002230
ENSXETG00000002231
ENSXETG00000002232
ENSXETG00000002233
ENSXETG00000002234
ENSXETG00000002237
ENSXETG00000002238
ENSXETG00000002240
ENSXETG00000002243
ENSXETG00000002245
ENSXETG00000002247
ENSXETG00000002252
ENSXETG00000002253
ENSXETG00000002257
ENSXETG00000002258
ENSXETG00000002260
ENSXETG00000002261
ENSXETG00000002262
ENSXETG00000002263
ENSXETG00000002264
ENSXETG00000002265
ENSXETG00000002268
ENSXETG00000002270
ENSXETG00000002271
ENSXETG00000002272
ENSXETG00000002273
ENSXETG00000002275
ENSXETG00000002278
ENSXETG00000002279
ENSXETG00000002288
ENSXETG00000002290
ENSXETG00000002292
ENSXETG00000002294
ENSXETG00000002295
ENSXETG00000002296
ENSXETG00000002302
ENSXETG00000002303
ENSXETG00000002305
ENSXETG00000002308
ENSXETG00000002310
ENSXETG00000002315
ENSXETG00000002319
ENSXETG00000002322
ENSXETG00000002324
ENSXETG00000002328
ENSXETG00000002330
ENSXETG00000002336
ENSXETG00000002339
ENSXETG00000002340
ENSXETG00000002359
ENSXETG00000002361
ENSXETG00000002363
ENSXETG00000002364
ENSXETG00000002371
ENSXETG00000002374
ENSXETG00000002376
ENSXETG00000002377
ENSXETG00000002378
ENSXETG00000002379
ENSXETG00000002387
ENSXETG00000002389
ENSXETG00000002392
ENSXETG00000002394
ENSXETG00000002396
ENSXETG00000002403
ENSXETG00000002408
ENSXETG00000002409
ENSXETG00000002410
ENSXETG00000002411
ENSXETG00000002414
ENSXETG00000002416
ENSXETG00000002417
ENSXETG00000002419
ENSXETG00000002421
ENSXETG00000002422
ENSXETG00000002423
ENSXETG00000002426
ENSXETG00000002427
ENSXETG00000002431
ENSXETG00000002437
ENSXETG00000002438
ENSXETG00000002439
ENSXETG00000002442
ENSXETG00000002447
ENSXETG00000002452
ENSXETG00000002453
ENSXETG00000002459
ENSXETG00000002460
ENSXETG00000002476
ENSXETG00000002479
ENSXETG00000002489
ENSXETG00000002490
ENSXETG00000002493
ENSXETG00000002494
ENSXETG00000002496
ENSXETG00000002498
ENSXETG00000002499
ENSXETG00000002500
ENSXETG00000002501
ENSXETG00000002503
ENSXETG00000002504
ENSXETG00000002505
ENSXETG00000002509
ENSXETG00000002510
ENSXETG00000002514
ENSXETG00000002515
ENSXETG00000002518
ENSXETG00000002522
ENSXETG00000002524
ENSXETG00000002525
ENSXETG00000002527
ENSXETG00000002528
ENSXETG00000002529
ENSXETG00000002532
ENSXETG00000002534
ENSXETG00000002535
ENSXETG00000002536
ENSXETG00000002538
ENSXETG00000002540
ENSXETG00000002542
ENSXETG00000002548
ENSXETG00000002549
ENSXETG00000002551
ENSXETG00000002553
ENSXETG00000002554
ENSXETG00000002555
ENSXETG00000002556
ENSXETG00000002557
ENSXETG00000002559
ENSXETG00000002566
ENSXETG00000002567
ENSXETG00000002568
ENSXETG00000002569
ENSXETG00000002570
ENSXETG00000002571
ENSXETG00000002573
ENSXETG00000002574
ENSXETG00000002577
ENSXETG00000002578
ENSXETG00000002582
ENSXETG00000002583
ENSXETG00000002585
ENSXETG00000002588
ENSXETG00000002589
ENSXETG00000002590
ENSXETG00000002592
ENSXETG00000002598
ENSXETG00000002602
ENSXETG00000002603
ENSXETG00000002604
ENSXETG00000002605
ENSXETG00000002608
ENSXETG00000002609
ENSXETG00000002610
ENSXETG00000002611
ENSXETG00000002617
ENSXETG00000002620
ENSXETG00000002635
ENSXETG00000002637
ENSXETG00000002639
ENSXETG00000002643
ENSXETG00000002645
ENSXETG00000002647
ENSXETG00000002648
ENSXETG00000002654
ENSXETG00000002657
ENSXETG00000002660
ENSXETG00000002662
ENSXETG00000002665
ENSXETG00000002668
ENSXETG00000002672
ENSXETG00000002673
ENSXETG00000002677
ENSXETG00000002678
ENSXETG00000002679
ENSXETG00000002680
ENSXETG00000002681
ENSXETG00000002682
ENSXETG00000002686
ENSXETG00000002690
ENSXETG00000002692
ENSXETG00000002694
ENSXETG00000002698
ENSXETG00000002699
ENSXETG00000002702
ENSXETG00000002703
ENSXETG00000002704
ENSXETG00000002707
ENSXETG00000002708
ENSXETG00000002709
ENSXETG00000002710
ENSXETG00000002711
ENSXETG00000002712
ENSXETG00000002713
ENSXETG00000002714
ENSXETG00000002717
ENSXETG00000002721
ENSXETG00000002724
ENSXETG00000002725
ENSXETG00000002726
ENSXETG00000002728
ENSXETG00000002733
ENSXETG00000002734
ENSXETG00000002739
ENSXETG00000002741
ENSXETG00000002745
ENSXETG00000002746
ENSXETG00000002749
ENSXETG00000002750
ENSXETG00000002751
ENSXETG00000002754
ENSXETG00000002758
ENSXETG00000002760
ENSXETG00000002761
ENSXETG00000002765
ENSXETG00000002767
ENSXETG00000002768
ENSXETG00000002769
ENSXETG00000002770
ENSXETG00000002772
ENSXETG00000002778
ENSXETG00000002780
ENSXETG00000002781
ENSXETG00000002782
ENSXETG00000002783
ENSXETG00000002784
ENSXETG00000002787
ENSXETG00000002788
ENSXETG00000002789
ENSXETG00000002790
ENSXETG00000002794
ENSXETG00000002796
ENSXETG00000002801
ENSXETG00000002805
ENSXETG00000002807
ENSXETG00000002816
ENSXETG00000002818
ENSXETG00000002819
ENSXETG00000002820
ENSXETG00000002821
ENSXETG00000002822
ENSXETG00000002823
ENSXETG00000002831
ENSXETG00000002833
ENSXETG00000002837
ENSXETG00000002840
ENSXETG00000002841
ENSXETG00000002842
ENSXETG00000002843
ENSXETG00000002846
ENSXETG00000002847
ENSXETG00000002849
ENSXETG00000002852
ENSXETG00000002853
ENSXETG00000002854
ENSXETG00000002859
ENSXETG00000002861
ENSXETG00000002863
ENSXETG00000002865
ENSXETG00000002868
ENSXETG00000002869
ENSXETG00000002871
ENSXETG00000002872
ENSXETG00000002873
ENSXETG00000002874
ENSXETG00000002875
ENSXETG00000002876
ENSXETG00000002877
ENSXETG00000002878
ENSXETG00000002879
ENSXETG00000002881
ENSXETG00000002882
ENSXETG00000002883
ENSXETG00000002886
ENSXETG00000002887
ENSXETG00000002888
ENSXETG00000002889
ENSXETG00000002892
ENSXETG00000002894
ENSXETG00000002899
ENSXETG00000002902
ENSXETG00000002904
ENSXETG00000002907
ENSXETG00000002908
ENSXETG00000002909
ENSXETG00000002911
ENSXETG00000002912
ENSXETG00000002914
ENSXETG00000002916
ENSXETG00000002917
ENSXETG00000002919
ENSXETG00000002921
ENSXETG00000002931
ENSXETG00000002935
ENSXETG00000002939
ENSXETG00000002940
ENSXETG00000002941
ENSXETG00000002942
ENSXETG00000002943
ENSXETG00000002944
ENSXETG00000002945
ENSXETG00000002947
ENSXETG00000002950
ENSXETG00000002954
ENSXETG00000002955
ENSXETG00000002957
ENSXETG00000002960
ENSXETG00000002963
ENSXETG00000002964
ENSXETG00000002966
ENSXETG00000002970
ENSXETG00000002971
ENSXETG00000002975
ENSXETG00000002976
ENSXETG00000002979
ENSXETG00000002980
ENSXETG00000002981
ENSXETG00000002983
ENSXETG00000002985
ENSXETG00000002987
ENSXETG00000002989
ENSXETG00000002992
ENSXETG00000002996
ENSXETG00000002997
ENSXETG00000003001
ENSXETG00000003002
ENSXETG00000003003
ENSXETG00000003004
ENSXETG00000003005
ENSXETG00000003006
ENSXETG00000003014
ENSXETG00000003015
ENSXETG00000003016
ENSXETG00000003017
ENSXETG00000003023
ENSXETG00000003028
ENSXETG00000003029
ENSXETG00000003032
ENSXETG00000003033
ENSXETG00000003034
ENSXETG00000003036
ENSXETG00000003037
ENSXETG00000003039
ENSXETG00000003043
ENSXETG00000003046
ENSXETG00000003049
ENSXETG00000003053
ENSXETG00000003055
ENSXETG00000003057
ENSXETG00000003060
ENSXETG00000003062
ENSXETG00000003063
ENSXETG00000003065
ENSXETG00000003066
ENSXETG00000003068
ENSXETG00000003071
ENSXETG00000003072
ENSXETG00000003073
ENSXETG00000003076
ENSXETG00000003077
ENSXETG00000003078
ENSXETG00000003079
ENSXETG00000003081
ENSXETG00000003083
ENSXETG00000003085
ENSXETG00000003087
ENSXETG00000003088
ENSXETG00000003090
ENSXETG00000003092
ENSXETG00000003094
ENSXETG00000003095
ENSXETG00000003096
ENSXETG00000003097
ENSXETG00000003099
ENSXETG00000003108
ENSXETG00000003118
ENSXETG00000003119
ENSXETG00000003121
ENSXETG00000003122
ENSXETG00000003123
ENSXETG00000003124
ENSXETG00000003125
ENSXETG00000003126
ENSXETG00000003127
ENSXETG00000003128
ENSXETG00000003129
ENSXETG00000003130
ENSXETG00000003133
ENSXETG00000003135
ENSXETG00000003136
ENSXETG00000003138
ENSXETG00000003141
ENSXETG00000003142
ENSXETG00000003146
ENSXETG00000003147
ENSXETG00000003149
ENSXETG00000003152
ENSXETG00000003154
ENSXETG00000003155
ENSXETG00000003156
ENSXETG00000003160
ENSXETG00000003164
ENSXETG00000003166
ENSXETG00000003167
ENSXETG00000003172
ENSXETG00000003175
ENSXETG00000003176
ENSXETG00000003177
ENSXETG00000003179
ENSXETG00000003191
ENSXETG00000003193
ENSXETG00000003194
ENSXETG00000003197
ENSXETG00000003199
ENSXETG00000003203
ENSXETG00000003209
ENSXETG00000003212
ENSXETG00000003217
ENSXETG00000003221
ENSXETG00000003222
ENSXETG00000003223
ENSXETG00000003233
ENSXETG00000003234
ENSXETG00000003237
ENSXETG00000003238
ENSXETG00000003240
ENSXETG00000003242
ENSXETG00000003243
ENSXETG00000003245
ENSXETG00000003246
ENSXETG00000003247
ENSXETG00000003249
ENSXETG00000003251
ENSXETG00000003253
ENSXETG00000003254
ENSXETG00000003257
ENSXETG00000003259
ENSXETG00000003260
ENSXETG00000003265
ENSXETG00000003266
ENSXETG00000003267
ENSXETG00000003268
ENSXETG00000003269
ENSXETG00000003270
ENSXETG00000003271
ENSXETG00000003278
ENSXETG00000003280
ENSXETG00000003281
ENSXETG00000003282
ENSXETG00000003283
ENSXETG00000003284
ENSXETG00000003287
ENSXETG00000003290
ENSXETG00000003291
ENSXETG00000003293
ENSXETG00000003296
ENSXETG00000003300
ENSXETG00000003301
ENSXETG00000003302
ENSXETG00000003303
ENSXETG00000003321
ENSXETG00000003326
ENSXETG00000003327
ENSXETG00000003328
ENSXETG00000003329
ENSXETG00000003330
ENSXETG00000003331
ENSXETG00000003337
ENSXETG00000003338
ENSXETG00000003339
ENSXETG00000003340
ENSXETG00000003345
ENSXETG00000003349
ENSXETG00000003351
ENSXETG00000003356
ENSXETG00000003357
ENSXETG00000003358
ENSXETG00000003361
ENSXETG00000003365
ENSXETG00000003366
ENSXETG00000003370
ENSXETG00000003371
ENSXETG00000003372
ENSXETG00000003373
ENSXETG00000003374
ENSXETG00000003375
ENSXETG00000003376
ENSXETG00000003377
ENSXETG00000003378
ENSXETG00000003381
ENSXETG00000003382
ENSXETG00000003384
ENSXETG00000003385
ENSXETG00000003386
ENSXETG00000003387
ENSXETG00000003388
ENSXETG00000003389
ENSXETG00000003390
ENSXETG00000003391
ENSXETG00000003392
ENSXETG00000003393
ENSXETG00000003394
ENSXETG00000003395
ENSXETG00000003396
ENSXETG00000003398
ENSXETG00000003399
ENSXETG00000003401
ENSXETG00000003402
ENSXETG00000003403
ENSXETG00000003405
ENSXETG00000003406
ENSXETG00000003414
ENSXETG00000003417
ENSXETG00000003419
ENSXETG00000003420
ENSXETG00000003421
ENSXETG00000003427
ENSXETG00000003430
ENSXETG00000003432
ENSXETG00000003434
ENSXETG00000003436
ENSXETG00000003439
ENSXETG00000003440
ENSXETG00000003442
ENSXETG00000003443
ENSXETG00000003447
ENSXETG00000003448
ENSXETG00000003449
ENSXETG00000003451
ENSXETG00000003454
ENSXETG00000003455
ENSXETG00000003457
ENSXETG00000003458
ENSXETG00000003459
ENSXETG00000003462
ENSXETG00000003464
ENSXETG00000003465
ENSXETG00000003466
ENSXETG00000003467
ENSXETG00000003468
ENSXETG00000003469
ENSXETG00000003470
ENSXETG00000003471
ENSXETG00000003472
ENSXETG00000003474
ENSXETG00000003477
ENSXETG00000003478
ENSXETG00000003479
ENSXETG00000003480
ENSXETG00000003483
ENSXETG00000003484
ENSXETG00000003489
ENSXETG00000003491
ENSXETG00000003493
ENSXETG00000003495
ENSXETG00000003496
ENSXETG00000003498
ENSXETG00000003501
ENSXETG00000003502
ENSXETG00000003504
ENSXETG00000003506
ENSXETG00000003507
ENSXETG00000003508
ENSXETG00000003512
ENSXETG00000003513
ENSXETG00000003514
ENSXETG00000003516
ENSXETG00000003517
ENSXETG00000003518
ENSXETG00000003519
ENSXETG00000003521
ENSXETG00000003522
ENSXETG00000003527
ENSXETG00000003529
ENSXETG00000003530
ENSXETG00000003532
ENSXETG00000003533
ENSXETG00000003534
ENSXETG00000003537
ENSXETG00000003539
ENSXETG00000003541
ENSXETG00000003544
ENSXETG00000003545
ENSXETG00000003548
ENSXETG00000003550
ENSXETG00000003552
ENSXETG00000003560
ENSXETG00000003561
ENSXETG00000003563
ENSXETG00000003565
ENSXETG00000003569
ENSXETG00000003570
ENSXETG00000003571
ENSXETG00000003573
ENSXETG00000003575
ENSXETG00000003576
ENSXETG00000003578
ENSXETG00000003579
ENSXETG00000003580
ENSXETG00000003583
ENSXETG00000003584
ENSXETG00000003585
ENSXETG00000003588
ENSXETG00000003591
ENSXETG00000003598
ENSXETG00000003602
ENSXETG00000003603
ENSXETG00000003604
ENSXETG00000003607
ENSXETG00000003608
ENSXETG00000003609
ENSXETG00000003610
ENSXETG00000003611
ENSXETG00000003614
ENSXETG00000003618
ENSXETG00000003619
ENSXETG00000003621
ENSXETG00000003622
ENSXETG00000003623
ENSXETG00000003625
ENSXETG00000003627
ENSXETG00000003628
ENSXETG00000003629
ENSXETG00000003631
ENSXETG00000003633
ENSXETG00000003634
ENSXETG00000003636
ENSXETG00000003637
ENSXETG00000003641
ENSXETG00000003642
ENSXETG00000003647
ENSXETG00000003648
ENSXETG00000003649
ENSXETG00000003653
ENSXETG00000003655
ENSXETG00000003657
ENSXETG00000003663
ENSXETG00000003664
ENSXETG00000003671
ENSXETG00000003672
ENSXETG00000003675
ENSXETG00000003678
ENSXETG00000003680
ENSXETG00000003682
ENSXETG00000003683
ENSXETG00000003686
ENSXETG00000003687
ENSXETG00000003690
ENSXETG00000003692
ENSXETG00000003693
ENSXETG00000003694
ENSXETG00000003696
ENSXETG00000003698
ENSXETG00000003702
ENSXETG00000003703
ENSXETG00000003704
ENSXETG00000003706
ENSXETG00000003707
ENSXETG00000003709
ENSXETG00000003712
ENSXETG00000003715
ENSXETG00000003716
ENSXETG00000003717
ENSXETG00000003718
ENSXETG00000003719
ENSXETG00000003723
ENSXETG00000003725
ENSXETG00000003726
ENSXETG00000003727
ENSXETG00000003728
ENSXETG00000003729
ENSXETG00000003731
ENSXETG00000003732
ENSXETG00000003733
ENSXETG00000003734
ENSXETG00000003735
ENSXETG00000003736
ENSXETG00000003737
ENSXETG00000003740
ENSXETG00000003742
ENSXETG00000003744
ENSXETG00000003746
ENSXETG00000003749
ENSXETG00000003753
ENSXETG00000003755
ENSXETG00000003756
ENSXETG00000003757
ENSXETG00000003758
ENSXETG00000003759
ENSXETG00000003760
ENSXETG00000003761
ENSXETG00000003763
ENSXETG00000003764
ENSXETG00000003765
ENSXETG00000003766
ENSXETG00000003767
ENSXETG00000003768
ENSXETG00000003772
ENSXETG00000003773
ENSXETG00000003775
ENSXETG00000003778
ENSXETG00000003780
ENSXETG00000003782
ENSXETG00000003783
ENSXETG00000003785
ENSXETG00000003788
ENSXETG00000003796
ENSXETG00000003797
ENSXETG00000003798
ENSXETG00000003799
ENSXETG00000003800
ENSXETG00000003805
ENSXETG00000003807
ENSXETG00000003810
ENSXETG00000003811
ENSXETG00000003815
ENSXETG00000003816
ENSXETG00000003817
ENSXETG00000003825
ENSXETG00000003827
ENSXETG00000003828
ENSXETG00000003829
ENSXETG00000003831
ENSXETG00000003833
ENSXETG00000003836
ENSXETG00000003837
ENSXETG00000003838
ENSXETG00000003846
ENSXETG00000003847
ENSXETG00000003848
ENSXETG00000003854
ENSXETG00000003857
ENSXETG00000003868
ENSXETG00000003869
ENSXETG00000003870
ENSXETG00000003871
ENSXETG00000003874
ENSXETG00000003875
ENSXETG00000003876
ENSXETG00000003880
ENSXETG00000003881
ENSXETG00000003885
ENSXETG00000003891
ENSXETG00000003892
ENSXETG00000003894
ENSXETG00000003899
ENSXETG00000003900
ENSXETG00000003906
ENSXETG00000003907
ENSXETG00000003908
ENSXETG00000003909
ENSXETG00000003911
ENSXETG00000003912
ENSXETG00000003914
ENSXETG00000003916
ENSXETG00000003920
ENSXETG00000003925
ENSXETG00000003926
ENSXETG00000003934
ENSXETG00000003936
ENSXETG00000003937
ENSXETG00000003938
ENSXETG00000003941
ENSXETG00000003943
ENSXETG00000003944
ENSXETG00000003945
ENSXETG00000003946
ENSXETG00000003947
ENSXETG00000003948
ENSXETG00000003950
ENSXETG00000003952
ENSXETG00000003954
ENSXETG00000003957
ENSXETG00000003959
ENSXETG00000003961
ENSXETG00000003971
ENSXETG00000003974
ENSXETG00000003976
ENSXETG00000003978
ENSXETG00000003979
ENSXETG00000003981
ENSXETG00000003985
ENSXETG00000003986
ENSXETG00000003999
ENSXETG00000004001
ENSXETG00000004002
ENSXETG00000004005
ENSXETG00000004007
ENSXETG00000004009
ENSXETG00000004010
ENSXETG00000004012
ENSXETG00000004015
ENSXETG00000004021
ENSXETG00000004022
ENSXETG00000004023
ENSXETG00000004026
ENSXETG00000004027
ENSXETG00000004029
ENSXETG00000004033
ENSXETG00000004035
ENSXETG00000004036
ENSXETG00000004037
ENSXETG00000004038
ENSXETG00000004039
ENSXETG00000004042
ENSXETG00000004043
ENSXETG00000004044
ENSXETG00000004045
ENSXETG00000004047
ENSXETG00000004048
ENSXETG00000004049
ENSXETG00000004050
ENSXETG00000004051
ENSXETG00000004052
ENSXETG00000004054
ENSXETG00000004060
ENSXETG00000004063
ENSXETG00000004065
ENSXETG00000004066
ENSXETG00000004067
ENSXETG00000004068
ENSXETG00000004073
ENSXETG00000004074
ENSXETG00000004076
ENSXETG00000004078
ENSXETG00000004079
ENSXETG00000004088
ENSXETG00000004092
ENSXETG00000004096
ENSXETG00000004097
ENSXETG00000004098
ENSXETG00000004102
ENSXETG00000004104
ENSXETG00000004106
ENSXETG00000004115
ENSXETG00000004118
ENSXETG00000004121
ENSXETG00000004123
ENSXETG00000004125
ENSXETG00000004126
ENSXETG00000004127
ENSXETG00000004129
ENSXETG00000004132
ENSXETG00000004136
ENSXETG00000004138
ENSXETG00000004144
ENSXETG00000004145
ENSXETG00000004148
ENSXETG00000004151
ENSXETG00000004152
ENSXETG00000004154
ENSXETG00000004155
ENSXETG00000004157
ENSXETG00000004165
ENSXETG00000004166
ENSXETG00000004167
ENSXETG00000004168
ENSXETG00000004169
ENSXETG00000004171
ENSXETG00000004172
ENSXETG00000004176
ENSXETG00000004177
ENSXETG00000004178
ENSXETG00000004179
ENSXETG00000004180
ENSXETG00000004181
ENSXETG00000004188
ENSXETG00000004189
ENSXETG00000004190
ENSXETG00000004192
ENSXETG00000004194
ENSXETG00000004196
ENSXETG00000004200
ENSXETG00000004201
ENSXETG00000004203
ENSXETG00000004205
ENSXETG00000004206
ENSXETG00000004208
ENSXETG00000004209
ENSXETG00000004211
ENSXETG00000004213
ENSXETG00000004215
ENSXETG00000004219
ENSXETG00000004220
ENSXETG00000004221
ENSXETG00000004222
ENSXETG00000004225
ENSXETG00000004227
ENSXETG00000004229
ENSXETG00000004230
ENSXETG00000004231
ENSXETG00000004234
ENSXETG00000004245
ENSXETG00000004247
ENSXETG00000004250
ENSXETG00000004251
ENSXETG00000004252
ENSXETG00000004253
ENSXETG00000004254
ENSXETG00000004256
ENSXETG00000004258
ENSXETG00000004263
ENSXETG00000004281
ENSXETG00000004282
ENSXETG00000004284
ENSXETG00000004287
ENSXETG00000004288
ENSXETG00000004289
ENSXETG00000004290
ENSXETG00000004291
ENSXETG00000004294
ENSXETG00000004295
ENSXETG00000004296
ENSXETG00000004297
ENSXETG00000004298
ENSXETG00000004300
ENSXETG00000004301
ENSXETG00000004302
ENSXETG00000004304
ENSXETG00000004305
ENSXETG00000004309
ENSXETG00000004310
ENSXETG00000004314
ENSXETG00000004315
ENSXETG00000004316
ENSXETG00000004317
ENSXETG00000004319
ENSXETG00000004320
ENSXETG00000004327
ENSXETG00000004328
ENSXETG00000004330
ENSXETG00000004333
ENSXETG00000004334
ENSXETG00000004336
ENSXETG00000004339
ENSXETG00000004348
ENSXETG00000004357
ENSXETG00000004360
ENSXETG00000004361
ENSXETG00000004362
ENSXETG00000004363
ENSXETG00000004364
ENSXETG00000004365
ENSXETG00000004366
ENSXETG00000004369
ENSXETG00000004370
ENSXETG00000004371
ENSXETG00000004373
ENSXETG00000004374
ENSXETG00000004376
ENSXETG00000004378
ENSXETG00000004379
ENSXETG00000004387
ENSXETG00000004388
ENSXETG00000004390
ENSXETG00000004391
ENSXETG00000004406
ENSXETG00000004407
ENSXETG00000004408
ENSXETG00000004409
ENSXETG00000004411
ENSXETG00000004412
ENSXETG00000004415
ENSXETG00000004417
ENSXETG00000004420
ENSXETG00000004423
ENSXETG00000004424
ENSXETG00000004425
ENSXETG00000004426
ENSXETG00000004428
ENSXETG00000004429
ENSXETG00000004431
ENSXETG00000004435
ENSXETG00000004436
ENSXETG00000004449
ENSXETG00000004450
ENSXETG00000004452
ENSXETG00000004454
ENSXETG00000004455
ENSXETG00000004456
ENSXETG00000004457
ENSXETG00000004460
ENSXETG00000004461
ENSXETG00000004462
ENSXETG00000004464
ENSXETG00000004466
ENSXETG00000004467
ENSXETG00000004468
ENSXETG00000004469
ENSXETG00000004470
ENSXETG00000004471
ENSXETG00000004472
ENSXETG00000004473
ENSXETG00000004474
ENSXETG00000004476
ENSXETG00000004477
ENSXETG00000004478
ENSXETG00000004479
ENSXETG00000004481
ENSXETG00000004483
ENSXETG00000004486
ENSXETG00000004487
ENSXETG00000004490
ENSXETG00000004491
ENSXETG00000004495
ENSXETG00000004496
ENSXETG00000004498
ENSXETG00000004499
ENSXETG00000004500
ENSXETG00000004501
ENSXETG00000004506
ENSXETG00000004516
ENSXETG00000004519
ENSXETG00000004521
ENSXETG00000004522
ENSXETG00000004524
ENSXETG00000004525
ENSXETG00000004526
ENSXETG00000004529
ENSXETG00000004530
ENSXETG00000004531
ENSXETG00000004532
ENSXETG00000004533
ENSXETG00000004534
ENSXETG00000004535
ENSXETG00000004536
ENSXETG00000004539
ENSXETG00000004542
ENSXETG00000004545
ENSXETG00000004546
ENSXETG00000004548
ENSXETG00000004549
ENSXETG00000004553
ENSXETG00000004554
ENSXETG00000004556
ENSXETG00000004558
ENSXETG00000004564
ENSXETG00000004571
ENSXETG00000004572
ENSXETG00000004573
ENSXETG00000004575
ENSXETG00000004578
ENSXETG00000004579
ENSXETG00000004580
ENSXETG00000004581
ENSXETG00000004583
ENSXETG00000004584
ENSXETG00000004589
ENSXETG00000004590
ENSXETG00000004592
ENSXETG00000004593
ENSXETG00000004595
ENSXETG00000004596
ENSXETG00000004597
ENSXETG00000004598
ENSXETG00000004606
ENSXETG00000004609
ENSXETG00000004611
ENSXETG00000004612
ENSXETG00000004614
ENSXETG00000004621
ENSXETG00000004623
ENSXETG00000004629
ENSXETG00000004630
ENSXETG00000004632
ENSXETG00000004635
ENSXETG00000004641
ENSXETG00000004643
ENSXETG00000004647
ENSXETG00000004649
ENSXETG00000004650
ENSXETG00000004651
ENSXETG00000004660
ENSXETG00000004664
ENSXETG00000004666
ENSXETG00000004668
ENSXETG00000004669
ENSXETG00000004670
[truncated: 11,583 more rows]

## Sheet: Danio rerio
ENSDARG00000000002
ENSDARG00000000018
ENSDARG00000000068
ENSDARG00000000069
ENSDARG00000000086
ENSDARG00000000102
ENSDARG00000000103
ENSDARG00000000142
ENSDARG00000000161
ENSDARG00000000175
ENSDARG00000000183
ENSDARG00000000189
ENSDARG00000000212
ENSDARG00000000229
ENSDARG00000000241
ENSDARG00000000324
ENSDARG00000000369
ENSDARG00000000370
ENSDARG00000000380
ENSDARG00000000384
ENSDARG00000000394
ENSDARG00000000472
ENSDARG00000000476
ENSDARG00000000489
ENSDARG00000000503
ENSDARG00000000529
ENSDARG00000000540
ENSDARG00000000542
ENSDARG00000000551
ENSDARG00000000563
ENSDARG00000000567
ENSDARG00000000568
ENSDARG00000000651
ENSDARG00000000666
ENSDARG00000000690
ENSDARG00000000729
ENSDARG00000000730
ENSDARG00000000747
ENSDARG00000000760
ENSDARG00000000779
ENSDARG00000000796
ENSDARG00000000804
ENSDARG00000000830
ENSDARG00000000837
ENSDARG00000000853
ENSDARG00000000857
ENSDARG00000000861
ENSDARG00000000887
ENSDARG00000000943
ENSDARG00000000966
ENSDARG00000000972
ENSDARG00000001009
ENSDARG00000001014
ENSDARG00000001015
ENSDARG00000001057
ENSDARG00000001127
ENSDARG00000001129
ENSDARG00000001154
ENSDARG00000001162
ENSDARG00000001169
ENSDARG00000001210
ENSDARG00000001220
ENSDARG00000001241
ENSDARG00000001244
ENSDARG00000001249
ENSDARG00000001259
ENSDARG00000001285
ENSDARG00000001313
ENSDARG00000001354
ENSDARG00000001414
ENSDARG00000001431
ENSDARG00000001442
ENSDARG00000001452
ENSDARG00000001463
ENSDARG00000001470
ENSDARG00000001498
ENSDARG00000001549
ENSDARG00000001558
ENSDARG00000001559
ENSDARG00000001578
ENSDARG00000001621
ENSDARG00000001634
ENSDARG00000001637
ENSDARG00000001676
ENSDARG00000001710
ENSDARG00000001721
ENSDARG00000001729
ENSDARG00000001734
ENSDARG00000001754
ENSDARG00000001760
ENSDARG00000001767
ENSDARG00000001769
ENSDARG00000001776
ENSDARG00000001777
ENSDARG00000001781
ENSDARG00000001782
ENSDARG00000001784
ENSDARG00000001785
ENSDARG00000001788
ENSDARG00000001803
ENSDARG00000001804
ENSDARG00000001807
ENSDARG00000001817
ENSDARG00000001818
ENSDARG00000001829
ENSDARG00000001835
ENSDARG00000001857
ENSDARG00000001859
ENSDARG00000001870
ENSDARG00000001879
ENSDARG00000001880
ENSDARG00000001881
ENSDARG00000001882
ENSDARG00000001888
ENSDARG00000001889
ENSDARG00000001890
ENSDARG00000001891
ENSDARG00000001898
ENSDARG00000001909
ENSDARG00000001910
ENSDARG00000001912
ENSDARG00000001913
ENSDARG00000001915
ENSDARG00000001929
ENSDARG00000001933
ENSDARG00000001937
ENSDARG00000001939
ENSDARG00000001940
ENSDARG00000001950
ENSDARG00000001969
ENSDARG00000001971
ENSDARG00000001975
ENSDARG00000001976
ENSDARG00000001993
ENSDARG00000001994
ENSDARG00000001999
ENSDARG00000002006
ENSDARG00000002016
ENSDARG00000002020
ENSDARG00000002021
ENSDARG00000002026
ENSDARG00000002031
ENSDARG00000002037
ENSDARG00000002060
ENSDARG00000002071
ENSDARG00000002077
ENSDARG00000002082
ENSDARG00000002084
ENSDARG00000002127
ENSDARG00000002128
ENSDARG00000002129
ENSDARG00000002131
ENSDARG00000002148
ENSDARG00000002167
ENSDARG00000002168
ENSDARG00000002172
ENSDARG00000002174
ENSDARG00000002184
ENSDARG00000002190
ENSDARG00000002192
ENSDARG00000002193
ENSDARG00000002194
ENSDARG00000002196
ENSDARG00000002197
ENSDARG00000002204
ENSDARG00000002210
ENSDARG00000002213
ENSDARG00000002215
ENSDARG00000002216
ENSDARG00000002217
ENSDARG00000002219
ENSDARG00000002220
ENSDARG00000002226
ENSDARG00000002230
ENSDARG00000002231
ENSDARG00000002235
ENSDARG00000002240
ENSDARG00000002241
ENSDARG00000002249
ENSDARG00000002255
ENSDARG00000002259
ENSDARG00000002264
ENSDARG00000002267
ENSDARG00000002271
ENSDARG00000002285
ENSDARG00000002293
ENSDARG00000002298
ENSDARG00000002299
ENSDARG00000002303
ENSDARG00000002304
ENSDARG00000002305
ENSDARG00000002311
ENSDARG00000002330
ENSDARG00000002332
ENSDARG00000002333
ENSDARG00000002336
ENSDARG00000002339
ENSDARG00000002344
ENSDARG00000002347
ENSDARG00000002355
ENSDARG00000002365
ENSDARG00000002369
ENSDARG00000002377
ENSDARG00000002385
ENSDARG00000002391
ENSDARG00000002394
ENSDARG00000002396
ENSDARG00000002400
ENSDARG00000002402
ENSDARG00000002403
ENSDARG00000002405
ENSDARG00000002411
ENSDARG00000002412
ENSDARG00000002414
ENSDARG00000002445
ENSDARG00000002463
ENSDARG00000002479
ENSDARG00000002483
ENSDARG00000002487
ENSDARG00000002494
ENSDARG00000002507
ENSDARG00000002510
ENSDARG00000002523
ENSDARG00000002533
ENSDARG00000002536
ENSDARG00000002538
ENSDARG00000002546
ENSDARG00000002552
ENSDARG00000002564
ENSDARG00000002571
ENSDARG00000002576
ENSDARG00000002582
ENSDARG00000002585
ENSDARG00000002587
ENSDARG00000002589
ENSDARG00000002591
ENSDARG00000002593
ENSDARG00000002597
ENSDARG00000002600
ENSDARG00000002601
ENSDARG00000002607
ENSDARG00000002609
ENSDARG00000002613
ENSDARG00000002614
ENSDARG00000002632
ENSDARG00000002634
ENSDARG00000002635
ENSDARG00000002642
ENSDARG00000002644
ENSDARG00000002656
ENSDARG00000002659
ENSDARG00000002663
ENSDARG00000002666
ENSDARG00000002670
ENSDARG00000002682
ENSDARG00000002685
ENSDARG00000002690
ENSDARG00000002696
ENSDARG00000002701
ENSDARG00000002702
ENSDARG00000002707
ENSDARG00000002710
ENSDARG00000002720
ENSDARG00000002731
ENSDARG00000002732
ENSDARG00000002745
ENSDARG00000002754
ENSDARG00000002758
ENSDARG00000002760
ENSDARG00000002764
ENSDARG00000002768
ENSDARG00000002771
ENSDARG00000002776
ENSDARG00000002779
ENSDARG00000002790
ENSDARG00000002794
ENSDARG00000002795
ENSDARG00000002826
ENSDARG00000002830
ENSDARG00000002831
ENSDARG00000002837
ENSDARG00000002840
ENSDARG00000002847
ENSDARG00000002872
ENSDARG00000002877
ENSDARG00000002880
ENSDARG00000002894
ENSDARG00000002897
ENSDARG00000002909
ENSDARG00000002933
ENSDARG00000002937
ENSDARG00000002945
ENSDARG00000002947
ENSDARG00000002949
ENSDARG00000002952
ENSDARG00000002968
ENSDARG00000002970
ENSDARG00000002971
ENSDARG00000002980
ENSDARG00000002981
ENSDARG00000002988
ENSDARG00000002991
ENSDARG00000002994
ENSDARG00000003008
ENSDARG00000003016
ENSDARG00000003017
ENSDARG00000003020
ENSDARG00000003021
ENSDARG00000003022
ENSDARG00000003032
ENSDARG00000003035
ENSDARG00000003041
ENSDARG00000003046
ENSDARG00000003049
ENSDARG00000003051
ENSDARG00000003058
ENSDARG00000003061
ENSDARG00000003068
ENSDARG00000003077
ENSDARG00000003081
ENSDARG00000003084
ENSDARG00000003085
ENSDARG00000003091
ENSDARG00000003098
ENSDARG00000003102
ENSDARG00000003113
ENSDARG00000003127
ENSDARG00000003132
ENSDARG00000003142
ENSDARG00000003144
ENSDARG00000003145
ENSDARG00000003146
ENSDARG00000003151
ENSDARG00000003153
ENSDARG00000003165
ENSDARG00000003167
ENSDARG00000003169
ENSDARG00000003175
ENSDARG00000003181
ENSDARG00000003189
ENSDARG00000003191
ENSDARG00000003200
ENSDARG00000003203
ENSDARG00000003205
ENSDARG00000003208
ENSDARG00000003210
ENSDARG00000003213
ENSDARG00000003216
ENSDARG00000003217
ENSDARG00000003219
ENSDARG00000003229
ENSDARG00000003235
ENSDARG00000003250
ENSDARG00000003257
ENSDARG00000003259
ENSDARG00000003263
ENSDARG00000003270
ENSDARG00000003281
ENSDARG00000003283
ENSDARG00000003287
ENSDARG00000003290
ENSDARG00000003293
ENSDARG00000003307
ENSDARG00000003308
ENSDARG00000003311
ENSDARG00000003317
ENSDARG00000003320
ENSDARG00000003323
ENSDARG00000003326
ENSDARG00000003373
ENSDARG00000003375
ENSDARG00000003380
ENSDARG00000003381
ENSDARG00000003382
ENSDARG00000003383
ENSDARG00000003384
ENSDARG00000003391
ENSDARG00000003395
ENSDARG00000003397
ENSDARG00000003398
ENSDARG00000003399
ENSDARG00000003403
ENSDARG00000003411
ENSDARG00000003414
ENSDARG00000003420
ENSDARG00000003421
ENSDARG00000003429
ENSDARG00000003444
ENSDARG00000003446
ENSDARG00000003449
ENSDARG00000003469
ENSDARG00000003470
ENSDARG00000003486
ENSDARG00000003487
ENSDARG00000003495
ENSDARG00000003511
ENSDARG00000003512
ENSDARG00000003513
ENSDARG00000003517
ENSDARG00000003519
ENSDARG00000003520
ENSDARG00000003526
ENSDARG00000003527
ENSDARG00000003531
ENSDARG00000003533
ENSDARG00000003544
ENSDARG00000003546
ENSDARG00000003564
ENSDARG00000003570
ENSDARG00000003573
ENSDARG00000003576
ENSDARG00000003582
ENSDARG00000003584
ENSDARG00000003592
ENSDARG00000003599
ENSDARG00000003607
ENSDARG00000003615
ENSDARG00000003616
ENSDARG00000003631
ENSDARG00000003632
ENSDARG00000003635
ENSDARG00000003641
ENSDARG00000003655
ENSDARG00000003680
ENSDARG00000003681
ENSDARG00000003682
ENSDARG00000003684
ENSDARG00000003693
ENSDARG00000003695
ENSDARG00000003697
ENSDARG00000003701
ENSDARG00000003705
ENSDARG00000003732
ENSDARG00000003749
ENSDARG00000003750
ENSDARG00000003751
ENSDARG00000003754
ENSDARG00000003757
ENSDARG00000003769
ENSDARG00000003776
ENSDARG00000003779
ENSDARG00000003783
ENSDARG00000003789
ENSDARG00000003795
ENSDARG00000003797
ENSDARG00000003803
ENSDARG00000003808
ENSDARG00000003813
ENSDARG00000003818
ENSDARG00000003820
ENSDARG00000003822
ENSDARG00000003827
ENSDARG00000003829
ENSDARG00000003835
ENSDARG00000003841
ENSDARG00000003845
ENSDARG00000003846
ENSDARG00000003854
ENSDARG00000003860
ENSDARG00000003866
ENSDARG00000003867
ENSDARG00000003869
ENSDARG00000003872
ENSDARG00000003877
ENSDARG00000003882
ENSDARG00000003899
ENSDARG00000003902
ENSDARG00000003910
ENSDARG00000003920
ENSDARG00000003925
ENSDARG00000003927
ENSDARG00000003931
ENSDARG00000003933
ENSDARG00000003934
ENSDARG00000003938
ENSDARG00000003940
ENSDARG00000003941
ENSDARG00000003961
ENSDARG00000003963
ENSDARG00000003965
ENSDARG00000003968
ENSDARG00000003969
ENSDARG00000003970
ENSDARG00000003971
ENSDARG00000003973
ENSDARG00000003974
ENSDARG00000003984
ENSDARG00000003991
ENSDARG00000003994
ENSDARG00000003998
ENSDARG00000004015
ENSDARG00000004017
ENSDARG00000004018
ENSDARG00000004023
ENSDARG00000004034
ENSDARG00000004049
ENSDARG00000004051
ENSDARG00000004055
ENSDARG00000004060
ENSDARG00000004074
ENSDARG00000004078
ENSDARG00000004082
ENSDARG00000004105
ENSDARG00000004114
ENSDARG00000004115
ENSDARG00000004130
ENSDARG00000004131
ENSDARG00000004132
ENSDARG00000004141
ENSDARG00000004148
ENSDARG00000004150
ENSDARG00000004154
ENSDARG00000004158
ENSDARG00000004160
ENSDARG00000004161
ENSDARG00000004167
ENSDARG00000004171
ENSDARG00000004173
ENSDARG00000004174
ENSDARG00000004176
ENSDARG00000004177
ENSDARG00000004187
ENSDARG00000004189
ENSDARG00000004196
ENSDARG00000004199
ENSDARG00000004211
ENSDARG00000004219
ENSDARG00000004227
ENSDARG00000004232
ENSDARG00000004246
ENSDARG00000004251
ENSDARG00000004261
ENSDARG00000004265
ENSDARG00000004274
ENSDARG00000004280
ENSDARG00000004282
ENSDARG00000004291
ENSDARG00000004296
ENSDARG00000004297
ENSDARG00000004301
ENSDARG00000004302
ENSDARG00000004305
ENSDARG00000004306
ENSDARG00000004307
ENSDARG00000004308
ENSDARG00000004311
ENSDARG00000004312
ENSDARG00000004318
ENSDARG00000004322
ENSDARG00000004325
ENSDARG00000004328
ENSDARG00000004336
ENSDARG00000004342
ENSDARG00000004343
ENSDARG00000004358
ENSDARG00000004363
ENSDARG00000004372
ENSDARG00000004377
ENSDARG00000004378
ENSDARG00000004386
ENSDARG00000004392
ENSDARG00000004402
ENSDARG00000004405
ENSDARG00000004406
ENSDARG00000004415
ENSDARG00000004427
ENSDARG00000004436
ENSDARG00000004445
ENSDARG00000004447
ENSDARG00000004451
ENSDARG00000004452
ENSDARG00000004455
ENSDARG00000004460
ENSDARG00000004470
ENSDARG00000004472
ENSDARG00000004473
ENSDARG00000004497
ENSDARG00000004502
ENSDARG00000004517
ENSDARG00000004525
ENSDARG00000004527
ENSDARG00000004529
ENSDARG00000004532
ENSDARG00000004537
ENSDARG00000004574
ENSDARG00000004576
ENSDARG00000004577
ENSDARG00000004580
ENSDARG00000004581
ENSDARG00000004587
ENSDARG00000004588
ENSDARG00000004592
ENSDARG00000004594
ENSDARG00000004597
ENSDARG00000004618
ENSDARG00000004621
ENSDARG00000004627
ENSDARG00000004633
ENSDARG00000004635
ENSDARG00000004636
ENSDARG00000004647
ENSDARG00000004648
ENSDARG00000004658
ENSDARG00000004665
ENSDARG00000004672
ENSDARG00000004680
ENSDARG00000004687
ENSDARG00000004692
ENSDARG00000004695
ENSDARG00000004696
ENSDARG00000004697
ENSDARG00000004702
ENSDARG00000004712
ENSDARG00000004713
ENSDARG00000004714
ENSDARG00000004722
ENSDARG00000004724
ENSDARG00000004727
ENSDARG00000004735
ENSDARG00000004745
ENSDARG00000004748
ENSDARG00000004753
ENSDARG00000004754
ENSDARG00000004757
ENSDARG00000004771
ENSDARG00000004774
ENSDARG00000004780
ENSDARG00000004782
ENSDARG00000004785
ENSDARG00000004796
ENSDARG00000004798
ENSDARG00000004803
ENSDARG00000004806
ENSDARG00000004823
ENSDARG00000004830
ENSDARG00000004836
ENSDARG00000004840
ENSDARG00000004843
ENSDARG00000004845
ENSDARG00000004851
ENSDARG00000004861
ENSDARG00000004864
ENSDARG00000004866
ENSDARG00000004869
ENSDARG00000004870
ENSDARG00000004874
ENSDARG00000004875
ENSDARG00000004877
ENSDARG00000004880
ENSDARG00000004889
ENSDARG00000004891
ENSDARG00000004896
ENSDARG00000004898
ENSDARG00000004904
ENSDARG00000004906
ENSDARG00000004909
ENSDARG00000004917
ENSDARG00000004925
ENSDARG00000004926
ENSDARG00000004930
ENSDARG00000004931
ENSDARG00000004932
ENSDARG00000004937
ENSDARG00000004939
ENSDARG00000004948
ENSDARG00000004954
ENSDARG00000004956
ENSDARG00000004958
ENSDARG00000004965
ENSDARG00000004979
ENSDARG00000004988
ENSDARG00000005001
ENSDARG00000005002
ENSDARG00000005004
ENSDARG00000005010
ENSDARG00000005015
ENSDARG00000005023
ENSDARG00000005026
ENSDARG00000005033
ENSDARG00000005034
ENSDARG00000005039
ENSDARG00000005049
ENSDARG00000005057
ENSDARG00000005058
ENSDARG00000005078
ENSDARG00000005085
ENSDARG00000005095
ENSDARG00000005098
ENSDARG00000005108
ENSDARG00000005112
ENSDARG00000005115
ENSDARG00000005121
ENSDARG00000005122
ENSDARG00000005128
ENSDARG00000005134
ENSDARG00000005139
ENSDARG00000005141
ENSDARG00000005150
ENSDARG00000005154
ENSDARG00000005159
ENSDARG00000005161
ENSDARG00000005162
ENSDARG00000005163
ENSDARG00000005172
ENSDARG00000005173
ENSDARG00000005176
ENSDARG00000005179
ENSDARG00000005185
ENSDARG00000005186
ENSDARG00000005191
ENSDARG00000005210
ENSDARG00000005216
ENSDARG00000005218
ENSDARG00000005220
ENSDARG00000005221
ENSDARG00000005230
ENSDARG00000005232
ENSDARG00000005236
ENSDARG00000005246
ENSDARG00000005251
ENSDARG00000005254
ENSDARG00000005257
ENSDARG00000005273
ENSDARG00000005274
ENSDARG00000005284
ENSDARG00000005315
ENSDARG00000005320
ENSDARG00000005333
ENSDARG00000005343
ENSDARG00000005359
ENSDARG00000005368
ENSDARG00000005372
ENSDARG00000005374
ENSDARG00000005382
ENSDARG00000005392
ENSDARG00000005394
ENSDARG00000005397
ENSDARG00000005414
ENSDARG00000005416
ENSDARG00000005423
ENSDARG00000005425
ENSDARG00000005446
ENSDARG00000005451
ENSDARG00000005453
ENSDARG00000005454
ENSDARG00000005458
ENSDARG00000005462
ENSDARG00000005463
ENSDARG00000005464
ENSDARG00000005470
ENSDARG00000005476
ENSDARG00000005479
ENSDARG00000005482
ENSDARG00000005500
ENSDARG00000005513
ENSDARG00000005518
ENSDARG00000005525
ENSDARG00000005526
ENSDARG00000005536
ENSDARG00000005540
ENSDARG00000005541
ENSDARG00000005544
ENSDARG00000005547
ENSDARG00000005549
ENSDARG00000005551
ENSDARG00000005559
ENSDARG00000005560
ENSDARG00000005561
ENSDARG00000005565
ENSDARG00000005567
ENSDARG00000005574
ENSDARG00000005576
ENSDARG00000005578
ENSDARG00000005590
ENSDARG00000005593
ENSDARG00000005595
ENSDARG00000005606
ENSDARG00000005612
ENSDARG00000005619
ENSDARG00000005626
ENSDARG00000005627
ENSDARG00000005629
ENSDARG00000005640
ENSDARG00000005642
ENSDARG00000005645
ENSDARG00000005648
ENSDARG00000005652
ENSDARG00000005670
ENSDARG00000005673
ENSDARG00000005675
ENSDARG00000005679
ENSDARG00000005690
ENSDARG00000005699
ENSDARG00000005704
ENSDARG00000005713
ENSDARG00000005716
ENSDARG00000005738
ENSDARG00000005739
ENSDARG00000005749
ENSDARG00000005754
ENSDARG00000005756
ENSDARG00000005772
ENSDARG00000005774
ENSDARG00000005775
ENSDARG00000005776
ENSDARG00000005780
ENSDARG00000005783
ENSDARG00000005785
ENSDARG00000005786
ENSDARG00000005789
ENSDARG00000005791
ENSDARG00000005799
ENSDARG00000005800
ENSDARG00000005823
ENSDARG00000005827
ENSDARG00000005828
ENSDARG00000005832
ENSDARG00000005834
ENSDARG00000005840
ENSDARG00000005841
ENSDARG00000005842
ENSDARG00000005853
ENSDARG00000005861
ENSDARG00000005867
ENSDARG00000005870
ENSDARG00000005872
ENSDARG00000005879
ENSDARG00000005883
ENSDARG00000005887
ENSDARG00000005891
ENSDARG00000005894
ENSDARG00000005897
ENSDARG00000005901
ENSDARG00000005908
ENSDARG00000005913
ENSDARG00000005915
ENSDARG00000005916
ENSDARG00000005924
ENSDARG00000005926
ENSDARG00000005941
ENSDARG00000005943
ENSDARG00000005944
ENSDARG00000005945
ENSDARG00000005947
ENSDARG00000005966
ENSDARG00000005972
ENSDARG00000005974
ENSDARG00000005989
ENSDARG00000006003
ENSDARG00000006005
ENSDARG00000006008
ENSDARG00000006017
ENSDARG00000006019
ENSDARG00000006021
ENSDARG00000006025
ENSDARG00000006031
ENSDARG00000006038
ENSDARG00000006040
ENSDARG00000006052
ENSDARG00000006060
ENSDARG00000006062
ENSDARG00000006065
ENSDARG00000006074
ENSDARG00000006079
ENSDARG00000006092
ENSDARG00000006093
ENSDARG00000006094
ENSDARG00000006110
ENSDARG00000006112
ENSDARG00000006120
ENSDARG00000006124
ENSDARG00000006125
ENSDARG00000006128
ENSDARG00000006137
ENSDARG00000006145
ENSDARG00000006169
ENSDARG00000006174
ENSDARG00000006181
ENSDARG00000006192
ENSDARG00000006196
ENSDARG00000006200
ENSDARG00000006202
ENSDARG00000006206
ENSDARG00000006207
ENSDARG00000006212
ENSDARG00000006215
ENSDARG00000006219
ENSDARG00000006220
ENSDARG00000006225
ENSDARG00000006235
ENSDARG00000006240
ENSDARG00000006242
ENSDARG00000006251
ENSDARG00000006253
ENSDARG00000006257
ENSDARG00000006260
ENSDARG00000006266
ENSDARG00000006275
ENSDARG00000006279
ENSDARG00000006283
ENSDARG00000006288
ENSDARG00000006290
ENSDARG00000006299
ENSDARG00000006300
ENSDARG00000006301
ENSDARG00000006307
ENSDARG00000006308
ENSDARG00000006314
ENSDARG00000006316
ENSDARG00000006331
ENSDARG00000006332
ENSDARG00000006345
ENSDARG00000006350
ENSDARG00000006353
ENSDARG00000006356
ENSDARG00000006370
ENSDARG00000006375
ENSDARG00000006383
ENSDARG00000006385
ENSDARG00000006389
ENSDARG00000006392
ENSDARG00000006394
ENSDARG00000006395
ENSDARG00000006396
ENSDARG00000006397
ENSDARG00000006399
ENSDARG00000006408
ENSDARG00000006409
ENSDARG00000006413
ENSDARG00000006420
ENSDARG00000006422
ENSDARG00000006427
ENSDARG00000006434
ENSDARG00000006456
ENSDARG00000006462
ENSDARG00000006467
ENSDARG00000006474
ENSDARG00000006477
ENSDARG00000006487
ENSDARG00000006491
ENSDARG00000006494
ENSDARG00000006497
ENSDARG00000006503
ENSDARG00000006508
ENSDARG00000006514
ENSDARG00000006518
ENSDARG00000006524
ENSDARG00000006526
ENSDARG00000006527
ENSDARG00000006544
ENSDARG00000006546
ENSDARG00000006553
ENSDARG00000006566
ENSDARG00000006567
ENSDARG00000006568
ENSDARG00000006577
ENSDARG00000006580
ENSDARG00000006584
ENSDARG00000006588
ENSDARG00000006598
ENSDARG00000006600
ENSDARG00000006601
ENSDARG00000006607
ENSDARG00000006609
ENSDARG00000006615
ENSDARG00000006617
ENSDARG00000006621
ENSDARG00000006624
ENSDARG00000006636
ENSDARG00000006640
ENSDARG00000006642
ENSDARG00000006666
ENSDARG00000006672
ENSDARG00000006677
ENSDARG00000006683
ENSDARG00000006686
ENSDARG00000006687
ENSDARG00000006691
ENSDARG00000006693
ENSDARG00000006705
ENSDARG00000006729
ENSDARG00000006747
ENSDARG00000006757
ENSDARG00000006758
ENSDARG00000006760
ENSDARG00000006766
ENSDARG00000006773
ENSDARG00000006782
ENSDARG00000006786
ENSDARG00000006791
ENSDARG00000006797
ENSDARG00000006811
ENSDARG00000006812
ENSDARG00000006816
ENSDARG00000006832
ENSDARG00000006837
ENSDARG00000006840
ENSDARG00000006849
ENSDARG00000006859
ENSDARG00000006862
ENSDARG00000006865
ENSDARG00000006868
ENSDARG00000006877
ENSDARG00000006878
ENSDARG00000006889
ENSDARG00000006891
ENSDARG00000006894
ENSDARG00000006896
ENSDARG00000006899
ENSDARG00000006900
ENSDARG00000006901
ENSDARG00000006911
ENSDARG00000006916
ENSDARG00000006921
ENSDARG00000006923
ENSDARG00000006924
ENSDARG00000006939
ENSDARG00000006963
ENSDARG00000006982
ENSDARG00000006983
ENSDARG00000006990
ENSDARG00000007009
ENSDARG00000007015
ENSDARG00000007025
ENSDARG00000007034
ENSDARG00000007045
ENSDARG00000007065
ENSDARG00000007077
ENSDARG00000007080
ENSDARG00000007081
ENSDARG00000007092
ENSDARG00000007097
ENSDARG00000007098
ENSDARG00000007099
ENSDARG00000007108
ENSDARG00000007125
ENSDARG00000007129
ENSDARG00000007130
ENSDARG00000007135
ENSDARG00000007136
ENSDARG00000007141
ENSDARG00000007149
ENSDARG00000007151
ENSDARG00000007169
ENSDARG00000007171
ENSDARG00000007172
ENSDARG00000007173
ENSDARG00000007175
ENSDARG00000007177
ENSDARG00000007179
ENSDARG00000007180
ENSDARG00000007181
ENSDARG00000007186
ENSDARG00000007195
ENSDARG00000007196
ENSDARG00000007198
ENSDARG00000007204
ENSDARG00000007207
ENSDARG00000007216
ENSDARG00000007217
ENSDARG00000007219
ENSDARG00000007220
ENSDARG00000007221
ENSDARG00000007222
ENSDARG00000007231
ENSDARG00000007244
ENSDARG00000007247
ENSDARG00000007250
ENSDARG00000007257
ENSDARG00000007264
ENSDARG00000007271
ENSDARG00000007275
ENSDARG00000007276
ENSDARG00000007277
ENSDARG00000007278
ENSDARG00000007279
ENSDARG00000007285
ENSDARG00000007294
ENSDARG00000007315
ENSDARG00000007320
ENSDARG00000007323
ENSDARG00000007329
ENSDARG00000007344
ENSDARG00000007347
ENSDARG00000007354
ENSDARG00000007356
ENSDARG00000007358
ENSDARG00000007359
ENSDARG00000007362
ENSDARG00000007366
ENSDARG00000007369
ENSDARG00000007370
ENSDARG00000007377
ENSDARG00000007382
ENSDARG00000007383
ENSDARG00000007385
ENSDARG00000007387
ENSDARG00000007396
ENSDARG00000007398
ENSDARG00000007405
ENSDARG00000007406
ENSDARG00000007407
ENSDARG00000007409
ENSDARG00000007412
ENSDARG00000007413
ENSDARG00000007421
ENSDARG00000007425
ENSDARG00000007429
ENSDARG00000007430
ENSDARG00000007436
ENSDARG00000007438
ENSDARG00000007444
ENSDARG00000007449
ENSDARG00000007477
ENSDARG00000007480
ENSDARG00000007485
ENSDARG00000007490
ENSDARG00000007496
ENSDARG00000007517
ENSDARG00000007523
ENSDARG00000007526
ENSDARG00000007531
ENSDARG00000007549
ENSDARG00000007553
ENSDARG00000007560
ENSDARG00000007566
ENSDARG00000007576
ENSDARG00000007582
ENSDARG00000007601
ENSDARG00000007603
ENSDARG00000007609
ENSDARG00000007614
ENSDARG00000007624
ENSDARG00000007628
ENSDARG00000007630
ENSDARG00000007639
ENSDARG00000007641
ENSDARG00000007654
ENSDARG00000007655
ENSDARG00000007657
ENSDARG00000007663
ENSDARG00000007665
ENSDARG00000007671
ENSDARG00000007678
ENSDARG00000007682
ENSDARG00000007691
ENSDARG00000007693
ENSDARG00000007697
ENSDARG00000007708
ENSDARG00000007709
ENSDARG00000007711
ENSDARG00000007714
ENSDARG00000007715
ENSDARG00000007720
ENSDARG00000007723
ENSDARG00000007727
ENSDARG00000007734
ENSDARG00000007737
ENSDARG00000007739
ENSDARG00000007744
ENSDARG00000007745
ENSDARG00000007751
ENSDARG00000007753
ENSDARG00000007755
ENSDARG00000007760
ENSDARG00000007764
ENSDARG00000007769
ENSDARG00000007774
ENSDARG00000007783
ENSDARG00000007786
ENSDARG00000007788
ENSDARG00000007791
ENSDARG00000007792
ENSDARG00000007795
ENSDARG00000007804
ENSDARG00000007807
ENSDARG00000007808
ENSDARG00000007812
ENSDARG00000007813
ENSDARG00000007818
ENSDARG00000007823
ENSDARG00000007824
ENSDARG00000007825
ENSDARG00000007836
ENSDARG00000007856
ENSDARG00000007863
ENSDARG00000007867
ENSDARG00000007869
ENSDARG00000007885
ENSDARG00000007886
ENSDARG00000007889
ENSDARG00000007891
ENSDARG00000007892
ENSDARG00000007901
ENSDARG00000007915
ENSDARG00000007916
ENSDARG00000007918
ENSDARG00000007923
ENSDARG00000007941
ENSDARG00000007943
ENSDARG00000007944
ENSDARG00000007955
ENSDARG00000007959
ENSDARG00000007960
ENSDARG00000007971
ENSDARG00000007975
ENSDARG00000007976
ENSDARG00000007988
ENSDARG00000007989
ENSDARG00000007993
ENSDARG00000007996
ENSDARG00000008010
ENSDARG00000008014
ENSDARG00000008020
ENSDARG00000008022
ENSDARG00000008026
ENSDARG00000008029
ENSDARG00000008030
ENSDARG00000008032
ENSDARG00000008034
ENSDARG00000008035
ENSDARG00000008049
ENSDARG00000008052
ENSDARG00000008060
ENSDARG00000008064
ENSDARG00000008068
ENSDARG00000008097
ENSDARG00000008100
ENSDARG00000008105
ENSDARG00000008107
ENSDARG00000008109
ENSDARG00000008119
ENSDARG00000008127
ENSDARG00000008131
ENSDARG00000008133
ENSDARG00000008140
ENSDARG00000008141
ENSDARG00000008153
ENSDARG00000008164
ENSDARG00000008165
ENSDARG00000008170
ENSDARG00000008174
ENSDARG00000008184
ENSDARG00000008186
ENSDARG00000008188
ENSDARG00000008191
ENSDARG00000008192
ENSDARG00000008200
ENSDARG00000008203
ENSDARG00000008209
ENSDARG00000008218
ENSDARG00000008235
ENSDARG00000008237
ENSDARG00000008239
ENSDARG00000008247
ENSDARG00000008249
ENSDARG00000008255
ENSDARG00000008263
ENSDARG00000008275
ENSDARG00000008278
ENSDARG00000008292
ENSDARG00000008305
ENSDARG00000008306
ENSDARG00000008310
ENSDARG00000008312
ENSDARG00000008322
ENSDARG00000008329
ENSDARG00000008333
ENSDARG00000008336
ENSDARG00000008350
ENSDARG00000008359
ENSDARG00000008363
ENSDARG00000008366
ENSDARG00000008370
ENSDARG00000008372
ENSDARG00000008377
ENSDARG00000008380
ENSDARG00000008383
ENSDARG00000008384
ENSDARG00000008388
ENSDARG00000008395
ENSDARG00000008398
ENSDARG00000008403
ENSDARG00000008407
ENSDARG00000008413
ENSDARG00000008414
ENSDARG00000008433
ENSDARG00000008439
ENSDARG00000008447
ENSDARG00000008450
ENSDARG00000008454
ENSDARG00000008457
ENSDARG00000008461
ENSDARG00000008472
ENSDARG00000008480
ENSDARG00000008487
ENSDARG00000008490
ENSDARG00000008491
ENSDARG00000008494
ENSDARG00000008502
ENSDARG00000008503
ENSDARG00000008540
ENSDARG00000008541
ENSDARG00000008542
ENSDARG00000008548
ENSDARG00000008551
ENSDARG00000008553
ENSDARG00000008560
ENSDARG00000008573
ENSDARG00000008575
ENSDARG00000008593
ENSDARG00000008623
ENSDARG00000008637
ENSDARG00000008639
ENSDARG00000008660
ENSDARG00000008662
ENSDARG00000008674
ENSDARG00000008680
ENSDARG00000008697
ENSDARG00000008703
ENSDARG00000008706
ENSDARG00000008720
ENSDARG00000008723
ENSDARG00000008735
ENSDARG00000008740
ENSDARG00000008748
ENSDARG00000008765
ENSDARG00000008767
ENSDARG00000008772
ENSDARG00000008784
ENSDARG00000008785
ENSDARG00000008790
ENSDARG00000008796
ENSDARG00000008803
ENSDARG00000008805
ENSDARG00000008807
ENSDARG00000008808
ENSDARG00000008811
ENSDARG00000008818
ENSDARG00000008829
ENSDARG00000008832
ENSDARG00000008835
ENSDARG00000008840
ENSDARG00000008858
ENSDARG00000008859
ENSDARG00000008861
ENSDARG00000008866
ENSDARG00000008867
ENSDARG00000008880
ENSDARG00000008884
ENSDARG00000008886
ENSDARG00000008887
ENSDARG00000008890
ENSDARG00000008904
ENSDARG00000008915
ENSDARG00000008920
ENSDARG00000008921
ENSDARG00000008931
ENSDARG00000008936
ENSDARG00000008937
ENSDARG00000008946
ENSDARG00000008947
ENSDARG00000008953
ENSDARG00000008966
ENSDARG00000008969
ENSDARG00000008976
ENSDARG00000008982
ENSDARG00000008986
ENSDARG00000009014
ENSDARG00000009018
ENSDARG00000009020
ENSDARG00000009021
ENSDARG00000009023
ENSDARG00000009026
ENSDARG00000009031
ENSDARG00000009045
ENSDARG00000009074
ENSDARG00000009081
ENSDARG00000009106
ENSDARG00000009113
ENSDARG00000009123
ENSDARG00000009131
ENSDARG00000009133
ENSDARG00000009134
ENSDARG00000009142
ENSDARG00000009153
ENSDARG00000009160
ENSDARG00000009169
ENSDARG00000009170
ENSDARG00000009175
ENSDARG00000009178
ENSDARG00000009194
ENSDARG00000009196
ENSDARG00000009208
ENSDARG00000009209
ENSDARG00000009212
ENSDARG00000009214
ENSDARG00000009215
ENSDARG00000009217
ENSDARG00000009242
ENSDARG00000009250
ENSDARG00000009252
ENSDARG00000009253
ENSDARG00000009264
ENSDARG00000009266
ENSDARG00000009267
ENSDARG00000009273
ENSDARG00000009280
ENSDARG00000009281
ENSDARG00000009285
ENSDARG00000009299
ENSDARG00000009311
ENSDARG00000009313
ENSDARG00000009315
ENSDARG00000009336
ENSDARG00000009341
ENSDARG00000009346
ENSDARG00000009350
ENSDARG00000009351
ENSDARG00000009361
ENSDARG00000009372
ENSDARG00000009386
ENSDARG00000009387
ENSDARG00000009390
ENSDARG00000009401
ENSDARG00000009402
ENSDARG00000009418
ENSDARG00000009430
ENSDARG00000009436
ENSDARG00000009442
ENSDARG00000009443
ENSDARG00000009447
ENSDARG00000009449
ENSDARG00000009459
ENSDARG00000009461
ENSDARG00000009466
ENSDARG00000009470
ENSDARG00000009472
ENSDARG00000009473
ENSDARG00000009480
ENSDARG00000009484
ENSDARG00000009488
ENSDARG00000009493
ENSDARG00000009494
ENSDARG00000009499
ENSDARG00000009505
ENSDARG00000009510
ENSDARG00000009524
ENSDARG00000009525
ENSDARG00000009534
ENSDARG00000009544
ENSDARG00000009549
ENSDARG00000009550
ENSDARG00000009553
ENSDARG00000009557
ENSDARG00000009563
ENSDARG00000009564
ENSDARG00000009567
ENSDARG00000009568
ENSDARG00000009585
ENSDARG00000009594
ENSDARG00000009607
ENSDARG00000009610
ENSDARG00000009612
ENSDARG00000009621
ENSDARG00000009624
ENSDARG00000009629
ENSDARG00000009637
ENSDARG00000009640
ENSDARG00000009653
ENSDARG00000009657
ENSDARG00000009677
ENSDARG00000009681
ENSDARG00000009685
ENSDARG00000009689
ENSDARG00000009693
ENSDARG00000009724
ENSDARG00000009735
ENSDARG00000009738
ENSDARG00000009740
ENSDARG00000009743
ENSDARG00000009745
ENSDARG00000009748
ENSDARG00000009753
ENSDARG00000009754
ENSDARG00000009764
ENSDARG00000009771
ENSDARG00000009779
ENSDARG00000009782
ENSDARG00000009783
ENSDARG00000009789
ENSDARG00000009793
ENSDARG00000009796
ENSDARG00000009802
ENSDARG00000009806
ENSDARG00000009822
ENSDARG00000009823
ENSDARG00000009825
ENSDARG00000009830
ENSDARG00000009837
ENSDARG00000009839
ENSDARG00000009844
ENSDARG00000009850
ENSDARG00000009851
ENSDARG00000009862
ENSDARG00000009864
ENSDARG00000009867
ENSDARG00000009870
ENSDARG00000009871
ENSDARG00000009875
ENSDARG00000009881
ENSDARG00000009885
ENSDARG00000009886
ENSDARG00000009890
ENSDARG00000009899
ENSDARG00000009901
ENSDARG00000009903
ENSDARG00000009905
ENSDARG00000009922
ENSDARG00000009930
ENSDARG00000009933
ENSDARG00000009939
ENSDARG00000009941
ENSDARG00000009942
ENSDARG00000009946
ENSDARG00000009949
ENSDARG00000009950
ENSDARG00000009953
ENSDARG00000009958
ENSDARG00000009961
ENSDARG00000009965
ENSDARG00000009978
ENSDARG00000009982
ENSDARG00000010002
ENSDARG00000010008
ENSDARG00000010010
ENSDARG00000010018
ENSDARG00000010021
ENSDARG00000010023
ENSDARG00000010025
ENSDARG00000010029
ENSDARG00000010031
ENSDARG00000010035
ENSDARG00000010042
ENSDARG00000010052
ENSDARG00000010059
ENSDARG00000010070
ENSDARG00000010073
ENSDARG00000010078
ENSDARG00000010083
ENSDARG00000010085
ENSDARG00000010096
ENSDARG00000010097
ENSDARG00000010098
ENSDARG00000010108
ENSDARG00000010113
ENSDARG00000010124
ENSDARG00000010130
ENSDARG00000010132
ENSDARG00000010137
ENSDARG00000010144
ENSDARG00000010145
ENSDARG00000010149
ENSDARG00000010154
ENSDARG00000010155
ENSDARG00000010158
ENSDARG00000010160
ENSDARG00000010181
ENSDARG00000010191
ENSDARG00000010192
ENSDARG00000010194
ENSDARG00000010207
ENSDARG00000010231
ENSDARG00000010238
ENSDARG00000010244
ENSDARG00000010246
ENSDARG00000010248
ENSDARG00000010250
ENSDARG00000010266
ENSDARG00000010267
ENSDARG00000010270
ENSDARG00000010276
ENSDARG00000010279
ENSDARG00000010280
ENSDARG00000010281
ENSDARG00000010290
ENSDARG00000010294
ENSDARG00000010297
ENSDARG00000010301
ENSDARG00000010312
ENSDARG00000010316
ENSDARG00000010318
ENSDARG00000010331
ENSDARG00000010332
ENSDARG00000010347
ENSDARG00000010350
ENSDARG00000010381
ENSDARG00000010382
ENSDARG00000010385
ENSDARG00000010400
ENSDARG00000010408
ENSDARG00000010411
ENSDARG00000010415
ENSDARG00000010420
ENSDARG00000010423
ENSDARG00000010425
ENSDARG00000010432
ENSDARG00000010434
ENSDARG00000010442
ENSDARG00000010445
ENSDARG00000010461
ENSDARG00000010462
ENSDARG00000010472
ENSDARG00000010477
ENSDARG00000010478
ENSDARG00000010481
ENSDARG00000010482
ENSDARG00000010487
ENSDARG00000010511
ENSDARG00000010515
ENSDARG00000010516
ENSDARG00000010519
ENSDARG00000010524
ENSDARG00000010531
ENSDARG00000010541
ENSDARG00000010553
ENSDARG00000010556
ENSDARG00000010563
ENSDARG00000010565
ENSDARG00000010571
ENSDARG00000010572
ENSDARG00000010583
ENSDARG00000010586
ENSDARG00000010591
ENSDARG00000010596
ENSDARG00000010601
ENSDARG00000010602
ENSDARG00000010603
ENSDARG00000010610
ENSDARG00000010625
ENSDARG00000010630
ENSDARG00000010640
ENSDARG00000010641
ENSDARG00000010655
ENSDARG00000010657
ENSDARG00000010673
ENSDARG00000010680
ENSDARG00000010681
ENSDARG00000010684
ENSDARG00000010700
ENSDARG00000010710
ENSDARG00000010717
ENSDARG00000010721
ENSDARG00000010727
ENSDARG00000010728
ENSDARG00000010732
ENSDARG00000010738
ENSDARG00000010752
ENSDARG00000010756
ENSDARG00000010758
ENSDARG00000010764
ENSDARG00000010767
ENSDARG00000010770
ENSDARG00000010771
ENSDARG00000010773
ENSDARG00000010779
ENSDARG00000010782
ENSDARG00000010783
ENSDARG00000010784
ENSDARG00000010785
ENSDARG00000010789
ENSDARG00000010791
ENSDARG00000010792
ENSDARG00000010793
ENSDARG00000010794
ENSDARG00000010816
ENSDARG00000010823
ENSDARG00000010831
ENSDARG00000010844
ENSDARG00000010853
ENSDARG00000010862
ENSDARG00000010878
ENSDARG00000010905
ENSDARG00000010906
ENSDARG00000010918
ENSDARG00000010925
ENSDARG00000010933
ENSDARG00000010934
ENSDARG00000010936
ENSDARG00000010940
ENSDARG00000010945
ENSDARG00000010946
ENSDARG00000010948
ENSDARG00000010953
ENSDARG00000010956
ENSDARG00000010957
ENSDARG00000010958
ENSDARG00000010962
ENSDARG00000010965
ENSDARG00000010977
ENSDARG00000010978
ENSDARG00000010981
ENSDARG00000010995
ENSDARG00000011000
ENSDARG00000011020
ENSDARG00000011023
ENSDARG00000011026
ENSDARG00000011027
ENSDARG00000011042
ENSDARG00000011055
ENSDARG00000011065
ENSDARG00000011066
ENSDARG00000011072
ENSDARG00000011076
ENSDARG00000011079
ENSDARG00000011083
ENSDARG00000011088
ENSDARG00000011091
ENSDARG00000011094
ENSDARG00000011113
ENSDARG00000011122
ENSDARG00000011125
ENSDARG00000011127
ENSDARG00000011133
ENSDARG00000011141
ENSDARG00000011146
ENSDARG00000011152
ENSDARG00000011163
ENSDARG00000011166
ENSDARG00000011168
ENSDARG00000011170
ENSDARG00000011171
ENSDARG00000011175
ENSDARG00000011184
ENSDARG00000011186
ENSDARG00000011188
ENSDARG00000011190
ENSDARG00000011196
ENSDARG00000011197
ENSDARG00000011201
ENSDARG00000011208
ENSDARG00000011219
ENSDARG00000011222
ENSDARG00000011235
ENSDARG00000011239
ENSDARG00000011240
ENSDARG00000011245
ENSDARG00000011246
ENSDARG00000011247
ENSDARG00000011259
ENSDARG00000011262
ENSDARG00000011272
ENSDARG00000011273
ENSDARG00000011281
ENSDARG00000011298
ENSDARG00000011299
ENSDARG00000011301
ENSDARG00000011312
ENSDARG00000011317
ENSDARG00000011326
ENSDARG00000011334
ENSDARG00000011360
ENSDARG00000011370
ENSDARG00000011371
ENSDARG00000011373
ENSDARG00000011376
ENSDARG00000011390
ENSDARG00000011400
ENSDARG00000011404
ENSDARG00000011405
ENSDARG00000011407
ENSDARG00000011408
ENSDARG00000011410
ENSDARG00000011418
ENSDARG00000011422
ENSDARG00000011434
ENSDARG00000011445
ENSDARG00000011449
ENSDARG00000011459
ENSDARG00000011462
ENSDARG00000011473
ENSDARG00000011487
ENSDARG00000011488
ENSDARG00000011490
ENSDARG00000011493
ENSDARG00000011496
ENSDARG00000011498
ENSDARG00000011506
ENSDARG00000011510
ENSDARG00000011511
ENSDARG00000011515
ENSDARG00000011519
ENSDARG00000011521
ENSDARG00000011533
ENSDARG00000011537
ENSDARG00000011538
ENSDARG00000011545
ENSDARG00000011549
ENSDARG00000011553
ENSDARG00000011555
ENSDARG00000011564
ENSDARG00000011571
ENSDARG00000011579
ENSDARG00000011582
ENSDARG00000011583
ENSDARG00000011594
ENSDARG00000011597
ENSDARG00000011600
ENSDARG00000011602
ENSDARG00000011605
ENSDARG00000011609
ENSDARG00000011611
ENSDARG00000011613
ENSDARG00000011615
ENSDARG00000011618
ENSDARG00000011635
ENSDARG00000011636
ENSDARG00000011637
ENSDARG00000011640
ENSDARG00000011648
ENSDARG00000011661
ENSDARG00000011662
ENSDARG00000011665
ENSDARG00000011666
ENSDARG00000011671
ENSDARG00000011672
ENSDARG00000011673
ENSDARG00000011683
ENSDARG00000011693
ENSDARG00000011696
ENSDARG00000011701
ENSDARG00000011703
ENSDARG00000011724
ENSDARG00000011727
ENSDARG00000011740
ENSDARG00000011743
ENSDARG00000011764
ENSDARG00000011769
ENSDARG00000011770
ENSDARG00000011777
ENSDARG00000011783
ENSDARG00000011785
ENSDARG00000011797
ENSDARG00000011801
ENSDARG00000011818
ENSDARG00000011821
ENSDARG00000011824
ENSDARG00000011825
ENSDARG00000011830
ENSDARG00000011837
ENSDARG00000011841
ENSDARG00000011845
ENSDARG00000011855
ENSDARG00000011863
ENSDARG00000011870
ENSDARG00000011885
ENSDARG00000011886
ENSDARG00000011890
ENSDARG00000011897
ENSDARG00000011909
ENSDARG00000011921
ENSDARG00000011925
ENSDARG00000011926
ENSDARG00000011929
ENSDARG00000011932
ENSDARG00000011934
ENSDARG00000011941
ENSDARG00000011945
ENSDARG00000011956
ENSDARG00000011958
ENSDARG00000011961
ENSDARG00000011973
ENSDARG00000011975
ENSDARG00000011983
ENSDARG00000011989
ENSDARG00000011998
ENSDARG00000011999
ENSDARG00000012002
ENSDARG00000012005
ENSDARG00000012013
ENSDARG00000012016
ENSDARG00000012019
ENSDARG00000012021
ENSDARG00000012025
ENSDARG00000012030
ENSDARG00000012035
ENSDARG00000012039
ENSDARG00000012040
ENSDARG00000012051
ENSDARG00000012060
ENSDARG00000012066
ENSDARG00000012071
ENSDARG00000012072
ENSDARG00000012073
ENSDARG00000012076
ENSDARG00000012078
ENSDARG00000012081
ENSDARG00000012094
ENSDARG00000012113
ENSDARG00000012125
ENSDARG00000012126
ENSDARG00000012130
ENSDARG00000012138
ENSDARG00000012140
ENSDARG00000012141
ENSDARG00000012144
ENSDARG00000012177
ENSDARG00000012184
ENSDARG00000012187
ENSDARG00000012192
ENSDARG00000012194
ENSDARG00000012199
ENSDARG00000012215
ENSDARG00000012222
ENSDARG00000012234
ENSDARG00000012244
ENSDARG00000012248
ENSDARG00000012249
ENSDARG00000012256
ENSDARG00000012261
ENSDARG00000012269
ENSDARG00000012271
ENSDARG00000012274
ENSDARG00000012281
ENSDARG00000012294
ENSDARG00000012295
ENSDARG00000012297
ENSDARG00000012306
ENSDARG00000012311
ENSDARG00000012314
ENSDARG00000012325
ENSDARG00000012330
ENSDARG00000012338
ENSDARG00000012340
ENSDARG00000012341
ENSDARG00000012347
ENSDARG00000012353
ENSDARG00000012366
ENSDARG00000012367
ENSDARG00000012368
ENSDARG00000012369
ENSDARG00000012378
ENSDARG00000012381
ENSDARG00000012387
ENSDARG00000012388
ENSDARG00000012389
ENSDARG00000012390
ENSDARG00000012395
ENSDARG00000012397
ENSDARG00000012399
ENSDARG00000012403
ENSDARG00000012405
ENSDARG00000012409
ENSDARG00000012422
ENSDARG00000012426
ENSDARG00000012432
ENSDARG00000012449
ENSDARG00000012450
ENSDARG00000012453
ENSDARG00000012458
ENSDARG00000012460
ENSDARG00000012467
ENSDARG00000012482
ENSDARG00000012485
ENSDARG00000012493
ENSDARG00000012495
ENSDARG00000012499
ENSDARG00000012504
ENSDARG00000012505
ENSDARG00000012506
ENSDARG00000012513
ENSDARG00000012519
ENSDARG00000012524
ENSDARG00000012534
ENSDARG00000012552
ENSDARG00000012553
ENSDARG00000012555
ENSDARG00000012563
ENSDARG00000012572
ENSDARG00000012574
ENSDARG00000012577
ENSDARG00000012586
ENSDARG00000012588
ENSDARG00000012591
ENSDARG00000012592
ENSDARG00000012593
ENSDARG00000012600
ENSDARG00000012603
ENSDARG00000012609
ENSDARG00000012610
ENSDARG00000012625
ENSDARG00000012627
ENSDARG00000012632
ENSDARG00000012640
ENSDARG00000012642
ENSDARG00000012649
ENSDARG00000012656
ENSDARG00000012667
ENSDARG00000012671
ENSDARG00000012672
[truncated: 16,639 more rows]

## Sheet: Branchiostoma floridae
bf-100007
bf-100009
bf-100031
bf-100070
bf-100071
bf-100072
bf-100073
bf-100078
bf-100084
bf-100087
bf-100093
bf-100109
bf-100152
bf-100190
bf-100191
bf-100231
bf-100307
bf-100524
bf-100555
bf-100556
bf-100558
bf-100560
bf-100561
bf-100594
bf-100605
bf-100607
bf-100651
bf-100653
bf-100693
bf-100695
bf-100697
bf-100698
bf-100813
bf-100816
bf-100817
bf-100822
bf-100823
bf-100824
bf-100825
bf-100826
bf-100827
bf-100847
bf-100848
bf-100903
bf-100908
bf-100910
bf-100912
bf-100915
bf-100931
bf-100932
bf-100933
bf-100934
bf-100935
bf-100937
bf-100940
bf-100944
bf-100945
bf-100948
bf-100954
bf-100956
bf-100960
bf-100967
bf-100971
bf-100974
bf-100977
bf-100980
bf-100983
bf-100987
bf-100988
bf-101014
bf-101073
bf-101075
bf-101089
bf-101105
bf-101106
bf-101110
bf-101111
bf-101132
bf-101136
bf-101148
bf-101158
bf-101215
bf-101225
bf-101235
bf-101243
bf-101261
bf-101262
bf-101265
bf-101337
bf-101341
bf-101343
bf-101346
bf-101348
bf-101357
bf-101358
bf-101362
bf-101363
bf-101365
bf-101448
bf-101451
bf-101548
bf-101561
bf-101582
bf-101634
bf-101637
bf-101667
bf-101668
bf-101670
bf-101689
bf-101697
bf-101704
bf-101747
bf-101769
bf-101774
bf-101796
bf-101827
bf-101828
bf-101829
bf-101840
bf-101900
bf-101901
bf-101905
bf-101907
bf-101911
bf-101929
bf-101939
bf-101948
bf-101949
bf-101951
bf-101958
bf-101983
bf-101998
bf-101999
bf-102026
bf-102041
bf-102045
bf-102052
bf-102053
bf-102054
bf-102067
bf-102080
bf-102082
bf-102086
bf-102093
bf-102098
bf-102101
bf-102103
bf-102104
bf-102106
bf-102119
bf-102176
bf-102183
bf-102185
bf-102192
bf-102194
bf-102195
bf-102198
bf-102202
bf-102207
bf-102211
bf-102221
bf-102224
bf-102226
bf-102237
bf-102251
bf-102254
bf-102264
bf-102370
bf-102371
bf-102380
bf-102386
bf-102424
bf-102435
bf-102436
bf-102458
bf-102461
bf-102463
bf-102466
bf-102473
bf-102475
bf-102477
bf-102479
bf-102486
bf-102519
bf-102546
bf-102552
bf-102558
bf-102561
bf-102566
bf-102567
bf-102570
bf-102572
bf-102573
bf-102575
bf-102600
bf-102609
bf-102610
bf-102612
bf-102617
bf-102619
bf-102620
bf-102740
bf-102741
bf-102849
bf-102850
bf-102853
bf-102855
bf-102858
bf-102938
bf-102939
bf-102944
bf-102946
bf-102947
bf-102948
bf-102973
bf-102993
bf-102997
bf-103036
bf-103129
bf-103131
bf-103205
bf-103211
bf-103224
bf-103227
bf-103241
bf-103259
bf-103263
bf-103280
bf-103415
bf-103448
bf-103449
bf-103545
bf-103547
bf-103550
bf-103563
bf-103566
bf-103569
bf-103575
bf-103581
bf-103585
bf-103595
bf-103597
bf-103600
bf-103607
bf-103696
bf-103712
bf-103717
bf-103730
bf-103731
bf-103732
bf-103794
bf-103802
bf-103804
bf-103805
bf-103834
bf-103836
bf-103838
bf-103901
bf-103902
bf-103918
bf-103922
bf-104084
bf-104091
bf-104092
bf-104102
bf-104104
bf-104106
bf-104111
bf-104114
bf-104157
bf-104160
bf-104164
bf-104192
bf-104267
bf-104269
bf-104277
bf-104278
bf-104340
bf-104341
bf-104343
bf-104344
bf-104350
bf-104351
bf-104352
bf-104375
bf-104410
bf-104411
bf-104415
bf-104462
bf-104483
bf-104490
bf-104559
bf-104576
bf-104581
bf-104582
bf-104583
bf-104591
bf-104592
bf-104604
bf-104697
bf-104762
bf-104768
bf-104807
bf-104811
bf-104813
bf-104815
bf-104816
bf-104821
bf-104837
bf-104841
bf-104849
bf-104891
bf-104894
bf-104896
bf-104957
bf-104964
bf-104967
bf-104971
bf-104980
bf-104987
bf-105001
bf-105006
bf-105034
bf-105037
bf-105041
bf-105050
bf-105074
bf-105086
bf-105090
bf-105091
bf-105092
bf-105100
bf-105101
bf-105111
bf-105116
bf-105134
bf-105135
bf-105136
bf-105167
bf-105169
bf-105174
bf-105176
bf-105199
bf-105205
bf-105215
bf-105217
bf-105224
bf-105240
bf-105245
bf-105252
bf-105254
bf-105255
bf-105257
bf-105258
bf-105267
bf-105269
bf-105423
bf-105433
bf-105468
bf-105469
bf-105473
bf-105493
bf-105511
bf-105512
bf-105513
bf-105515
bf-105527
bf-105530
bf-105531
bf-105534
bf-105565
bf-105578
bf-105585
bf-105599
bf-105600
bf-105605
bf-105609
bf-105611
bf-105612
bf-105615
bf-105617
bf-105657
bf-105671
bf-105674
bf-105683
bf-105684
bf-105692
bf-105694
bf-105733
bf-105734
bf-105736
bf-105738
bf-105739
bf-105740
bf-105741
bf-105744
bf-105747
bf-105750
bf-105751
bf-105752
bf-105816
bf-105826
bf-105827
bf-105854
bf-105855
bf-105862
bf-105863
bf-105864
bf-105865
bf-105908
bf-105911
bf-105913
bf-105917
bf-105919
bf-105923
bf-105925
bf-105949
bf-105957
bf-105958
bf-105965
bf-105974
bf-105975
bf-105983
bf-105990
bf-106105
bf-106108
bf-106127
bf-106177
bf-106179
bf-106180
bf-106186
bf-106189
bf-106234
bf-106293
bf-106298
bf-106299
bf-106301
bf-106305
bf-106338
bf-106342
bf-106344
bf-106348
bf-106349
bf-106350
bf-106358
bf-106360
bf-106363
bf-106370
bf-106371
bf-106409
bf-106446
bf-106450
bf-106459
bf-106462
bf-106498
bf-106503
bf-106505
bf-106506
bf-106508
bf-106517
bf-106523
bf-106557
bf-106560
bf-106562
bf-106563
bf-106569
bf-106572
bf-106573
bf-106577
bf-106580
bf-106581
bf-106624
bf-106692
bf-106709
bf-106799
bf-106809
bf-106815
bf-106816
bf-106853
bf-106856
bf-106907
bf-106909
bf-106952
bf-107074
bf-107075
bf-107080
bf-107085
bf-107092
bf-107093
bf-107097
bf-107099
bf-107108
bf-107137
bf-107179
bf-107190
bf-107246
bf-107287
bf-107294
bf-107296
bf-107298
bf-107299
bf-107300
bf-107304
bf-107332
bf-107492
bf-107506
bf-107507
bf-107521
bf-107537
bf-107667
bf-107668
bf-107704
bf-107712
bf-107715
bf-107717
bf-107789
bf-107794
bf-107797
bf-107805
bf-107807
bf-107814
bf-107990
bf-108028
bf-108029
bf-108080
bf-108084
bf-108085
bf-108092
bf-108093
bf-108120
bf-108172
bf-108176
bf-108183
bf-108184
bf-108185
bf-108188
bf-108192
bf-108193
bf-108197
bf-108198
bf-108217
bf-108254
bf-108272
bf-108372
bf-108375
bf-108419
bf-108533
bf-108541
bf-108611
bf-108612
bf-108631
bf-108677
bf-108686
bf-108699
bf-108700
bf-108708
bf-108711
bf-108714
bf-108715
bf-108765
bf-108787
bf-108788
bf-108792
bf-108900
bf-108977
bf-108982
bf-108984
bf-108985
bf-108989
bf-108991
bf-109001
bf-109087
bf-109202
bf-109206
bf-109286
bf-109320
bf-109327
bf-109328
bf-109331
bf-109340
bf-109347
bf-109348
bf-109351
bf-109419
bf-109429
bf-109430
bf-109548
bf-109549
bf-109550
bf-109551
bf-109552
bf-109574
bf-109575
bf-109576
bf-109693
bf-109713
bf-109715
bf-109719
bf-109731
bf-109858
bf-109996
bf-110000
bf-110039
bf-110047
bf-110061
bf-110072
bf-110117
bf-110163
bf-110180
bf-110181
bf-110183
bf-110184
bf-110187
bf-110210
bf-110212
bf-110219
bf-110230
bf-110243
bf-110244
bf-110402
bf-110403
bf-110406
bf-110431
bf-110510
bf-110563
bf-110722
bf-110734
bf-110743
bf-110759
bf-110776
bf-110777
bf-110778
bf-110788
bf-110967
bf-110968
bf-110971
bf-110987
bf-110988
bf-111011
bf-111014
bf-111038
bf-111050
bf-111051
bf-111065
bf-111076
bf-111136
bf-111163
bf-111270
bf-111359
bf-111361
bf-111362
bf-111367
bf-111389
bf-111390
bf-111409
bf-111440
bf-111441
bf-111445
bf-111559
bf-111593
bf-111600
bf-111611
bf-111619
bf-111640
bf-111641
bf-111656
bf-111666
bf-111667
bf-111693
bf-111694
bf-111736
bf-111746
bf-111773
bf-111776
bf-111785
bf-111805
bf-111838
bf-111868
bf-111889
bf-111895
bf-111932
bf-111940
bf-111941
bf-111943
bf-111962
bf-113477
bf-113513
bf-113515
bf-113516
bf-113520
bf-113531
bf-113546
bf-113547
bf-113552
bf-113576
bf-113584
bf-113595
bf-113596
bf-113602
bf-113666
bf-113668
bf-113674
bf-113695
bf-113697
bf-113702
bf-113706
bf-113709
bf-113712
bf-113716
bf-113717
bf-113725
bf-113728
bf-113729
bf-113730
bf-113731
bf-113732
bf-113733
bf-113735
bf-113736
bf-113737
bf-113741
bf-113744
bf-113766
bf-113768
bf-113774
bf-113786
bf-113790
bf-113805
bf-113823
bf-113824
bf-113826
bf-113828
bf-113832
bf-113841
bf-113843
bf-113847
bf-113848
bf-113849
bf-113850
bf-113856
bf-113863
bf-113873
bf-113892
bf-113894
bf-113929
bf-113957
bf-113974
bf-113980
bf-113988
bf-113994
bf-114006
bf-114024
bf-114034
bf-114064
bf-114078
bf-114081
bf-114090
bf-114091
bf-114103
bf-114106
bf-114107
bf-114121
bf-114158
bf-114160
bf-114166
bf-114171
bf-114204
bf-114223
bf-114225
bf-114239
bf-114254
bf-114257
bf-114302
bf-114333
bf-114344
bf-114372
bf-114379
bf-114381
bf-114393
bf-114402
bf-114419
bf-114421
bf-114431
bf-114435
bf-114460
bf-114462
bf-114473
bf-114476
bf-114478
bf-114510
bf-114536
bf-114580
bf-114607
bf-114609
bf-114616
bf-114632
bf-114633
bf-114646
bf-114654
bf-114662
bf-114663
bf-114681
bf-114693
bf-114709
bf-114710
bf-114712
bf-114719
bf-114725
bf-114729
bf-114732
bf-114734
bf-114735
bf-114745
bf-114749
bf-114756
bf-114758
bf-114776
bf-114777
bf-114782
bf-114783
bf-114797
bf-114801
bf-114822
bf-114825
bf-114843
bf-114849
bf-114859
bf-114861
bf-114865
bf-114866
bf-114879
bf-114883
bf-114904
bf-114907
bf-114913
bf-114918
bf-114927
bf-114929
bf-114958
bf-114977
bf-114978
bf-114989
bf-115002
bf-115005
bf-115029
bf-115035
bf-115039
bf-115040
bf-115064
bf-115066
bf-115071
bf-115076
bf-115078
bf-115079
bf-115111
bf-115113
bf-115127
bf-115150
bf-115199
bf-115204
bf-115206
bf-115208
bf-115218
bf-115228
bf-115230
bf-115231
bf-115250
bf-115255
bf-115258
bf-115265
bf-115270
bf-115274
bf-115286
bf-115287
bf-115295
bf-115296
bf-115305
bf-115317
bf-115340
bf-115348
bf-115356
bf-115374
bf-115377
bf-115378
bf-115392
bf-115393
bf-115394
bf-115396
bf-115397
bf-115405
bf-115415
bf-115416
bf-115417
bf-115421
bf-115429
bf-115431
bf-115434
bf-115435
bf-115441
bf-115449
bf-115457
bf-115459
bf-115464
bf-115479
bf-115491
bf-115498
bf-115526
bf-115527
bf-115565
bf-115566
bf-115568
bf-115591
bf-115608
bf-115609
bf-115616
bf-115629
bf-115635
bf-115660
bf-115687
bf-115689
bf-115711
bf-115715
bf-115732
bf-115743
bf-115771
bf-115787
bf-115797
bf-115833
bf-115857
bf-115910
bf-115951
bf-115980
bf-115982
bf-115983
bf-116017
bf-116038
bf-116049
bf-116053
bf-116065
bf-116066
bf-116075
bf-116078
bf-116094
bf-116106
bf-116178
bf-116212
bf-116214
bf-116231
bf-116232
bf-116233
bf-116257
bf-116259
bf-116266
bf-116267
bf-116320
bf-116394
bf-116402
bf-116449
bf-116634
bf-116660
bf-116672
bf-116694
bf-116712
bf-116855
bf-116862
bf-116863
bf-116869
bf-116879
bf-116887
bf-116900
bf-116903
bf-116913
bf-116914
bf-116948
bf-116949
bf-116956
bf-116966
bf-116968
bf-116970
bf-116972
bf-116973
bf-116976
bf-116977
bf-116978
bf-116982
bf-116988
bf-117011
bf-117020
bf-117021
bf-117022
bf-117023
bf-117027
bf-117030
bf-117036
bf-117038
bf-117039
bf-117043
bf-117044
bf-117045
bf-117049
bf-117067
bf-117068
bf-117072
bf-117073
bf-117077
bf-117078
bf-117080
bf-117082
bf-117083
bf-117084
bf-117085
bf-117089
bf-117097
bf-117100
bf-117102
bf-117103
bf-117106
bf-117107
bf-117110
bf-117111
bf-117112
bf-117113
bf-117121
bf-117123
bf-117130
bf-117131
bf-117134
bf-117138
bf-117143
bf-117144
bf-117145
bf-117148
bf-117149
bf-117151
bf-117152
bf-117153
bf-117155
bf-117159
bf-117160
bf-117161
bf-117162
bf-117164
bf-117171
bf-117174
bf-117176
bf-117178
bf-117180
bf-117183
bf-117188
bf-117190
bf-117193
bf-117194
bf-117196
bf-117197
bf-117200
bf-117207
bf-117215
bf-117218
bf-117221
bf-117223
bf-117224
bf-117227
bf-117228
bf-117229
bf-117230
bf-117231
bf-117239
bf-117242
bf-117244
bf-117250
bf-117253
bf-117261
bf-117262
bf-117267
bf-117275
bf-117276
bf-117282
bf-117283
bf-117284
bf-117286
bf-117290
bf-117292
bf-117294
bf-117297
bf-117298
bf-117317
bf-117349
bf-117361
bf-117362
bf-117363
bf-117366
bf-117369
bf-117374
bf-117380
bf-117382
bf-117383
bf-117384
bf-117385
bf-117390
bf-117393
bf-117398
bf-117401
bf-117464
bf-117467
bf-117471
bf-117473
bf-117488
bf-117489
bf-117503
bf-117504
bf-117505
bf-117506
bf-117507
bf-117509
bf-117510
bf-117511
bf-117518
bf-117535
bf-117536
bf-117542
bf-117550
bf-117556
bf-117560
bf-117561
bf-117568
bf-117569
bf-117588
bf-117597
bf-117615
bf-117616
bf-117623
bf-117626
bf-117627
bf-117637
bf-117640
bf-117645
bf-117651
bf-117652
bf-117667
bf-117670
bf-117675
bf-117676
bf-117683
bf-117689
bf-117695
bf-117714
bf-117715
bf-117717
bf-117718
bf-117719
bf-117723
bf-117731
bf-117732
bf-117733
bf-117734
bf-117737
bf-117738
bf-117739
bf-117740
bf-117741
bf-117742
bf-117746
bf-117751
bf-117756
bf-117763
bf-117765
bf-117767
bf-117769
bf-117777
bf-117780
bf-117782
bf-117784
bf-117786
bf-117810
bf-117811
bf-117812
bf-117813
bf-117814
bf-117816
bf-117821
bf-117822
bf-117824
bf-117827
bf-117848
bf-117849
bf-117851
bf-117854
bf-117855
bf-117861
bf-117877
bf-117881
bf-117882
bf-117885
bf-117890
bf-117891
bf-117893
bf-117901
bf-117907
bf-117916
bf-117918
bf-117919
bf-117920
bf-117936
bf-117937
bf-117942
bf-117947
bf-117962
bf-117966
bf-117970
bf-117987
bf-117989
bf-118007
bf-118016
bf-118020
bf-118024
bf-118028
bf-118033
bf-118038
bf-118041
bf-118043
bf-118049
bf-118051
bf-118052
bf-118054
bf-118055
bf-118056
bf-118067
bf-118068
bf-118074
bf-118075
bf-118076
bf-118081
bf-118099
bf-118100
bf-118103
bf-118118
bf-118145
bf-118146
bf-118148
bf-118158
bf-118159
bf-118166
bf-118167
bf-118175
bf-118178
bf-118180
bf-118182
bf-118183
bf-118184
bf-118185
bf-118187
bf-118191
bf-118201
bf-118202
bf-118205
bf-118207
bf-118208
bf-118210
bf-118213
bf-118221
bf-118224
bf-118235
bf-118238
bf-118244
bf-118247
bf-118249
bf-118250
bf-118259
bf-118261
bf-118262
bf-118263
bf-118265
bf-118269
bf-118274
bf-118283
bf-118285
bf-118286
bf-118294
bf-118295
bf-118296
bf-118298
bf-118299
bf-118300
bf-118304
bf-118305
bf-118306
bf-118308
bf-118309
bf-118311
bf-118313
bf-118314
bf-118317
bf-118320
bf-118322
bf-118327
bf-118329
bf-118332
bf-118333
bf-118334
bf-118338
bf-118340
bf-118345
bf-118346
bf-118348
bf-118351
bf-118354
bf-118356
bf-118361
bf-118362
bf-118365
bf-118369
bf-118372
bf-118373
bf-118374
bf-118375
bf-118380
bf-118381
bf-118382
bf-118383
bf-118384
bf-118389
bf-118390
bf-118391
bf-118395
bf-118397
bf-118401
bf-118405
bf-118409
bf-118414
bf-118415
bf-118418
bf-118420
bf-118421
bf-118422
bf-118423
bf-118426
bf-118428
bf-118430
bf-118431
bf-118432
bf-118434
bf-118435
bf-118438
bf-118439
bf-118443
bf-118445
bf-118448
bf-118454
bf-118457
bf-118458
bf-118464
bf-118466
bf-118473
bf-118475
bf-118487
bf-118492
bf-118495
bf-118496
bf-118498
bf-118500
bf-118502
bf-118503
bf-118507
bf-118508
bf-118509
bf-118510
bf-118511
bf-118513
bf-118514
bf-118516
bf-118521
bf-118524
bf-118526
bf-118527
bf-118530
bf-118531
bf-118533
bf-118535
bf-118543
bf-118544
bf-118547
bf-118552
bf-118553
bf-118556
bf-118597
bf-118599
bf-118602
bf-118605
bf-118606
bf-118609
bf-118619
bf-118620
bf-118621
bf-118622
bf-118626
bf-118627
bf-118628
bf-118631
bf-118632
bf-118634
bf-118636
bf-118640
bf-118643
bf-118650
bf-118651
bf-118655
bf-118656
bf-118658
bf-118660
bf-118661
bf-118663
bf-118666
bf-118667
bf-118668
bf-118669
bf-118671
bf-118675
bf-118677
bf-118679
bf-118680
bf-118685
bf-118691
bf-118697
bf-118700
bf-118702
bf-118706
bf-118709
bf-118710
bf-118711
bf-118717
bf-118718
bf-118723
bf-118724
bf-118725
bf-118726
bf-118728
bf-118729
bf-118730
bf-118736
bf-118737
bf-118738
bf-118745
bf-118753
bf-118755
bf-118756
bf-118762
bf-118764
bf-118767
bf-118768
bf-118769
bf-118772
bf-118773
bf-118775
bf-118776
bf-118785
bf-118790
bf-118791
bf-118793
bf-118794
bf-118795
bf-118796
bf-118800
bf-118803
bf-118806
bf-118811
bf-118813
bf-118816
bf-118819
bf-118822
bf-118823
bf-118862
bf-118863
bf-118866
bf-118867
bf-118868
bf-118870
bf-118871
bf-118872
bf-118873
bf-118874
bf-118875
bf-118878
bf-118881
bf-118884
bf-118891
bf-118892
bf-118894
bf-118895
bf-118897
bf-118898
bf-118903
bf-118904
bf-118907
bf-118908
bf-118910
bf-118912
bf-118915
bf-118916
bf-118918
bf-118920
bf-118926
bf-118927
bf-118928
bf-118930
bf-118946
bf-118947
bf-118948
bf-118949
bf-118950
bf-118952
bf-118956
bf-118957
bf-118958
bf-118965
bf-118966
bf-118971
bf-118973
bf-118974
bf-118981
bf-118984
bf-118985
bf-118989
bf-118990
bf-118994
bf-118997
bf-119000
bf-119002
bf-119003
bf-119004
bf-119014
bf-119019
bf-119020
bf-119021
bf-119024
bf-119025
bf-119029
bf-119030
bf-119031
bf-119037
bf-119044
bf-119046
bf-119047
bf-119050
bf-119059
bf-119061
bf-119062
bf-119065
bf-119066
bf-119070
bf-119073
bf-119075
bf-119080
bf-119082
bf-119083
bf-119085
bf-119086
bf-119087
bf-119089
bf-119093
bf-119094
bf-119097
bf-119101
bf-119106
bf-119115
bf-119133
bf-119140
bf-119142
bf-119144
bf-119145
bf-119180
bf-119181
bf-119182
bf-119185
bf-119198
bf-119200
bf-119204
bf-119209
bf-119220
bf-119224
bf-119256
bf-119257
bf-119258
bf-119260
bf-119264
bf-119265
bf-119271
bf-119272
bf-119273
bf-119277
bf-119282
bf-119287
bf-119291
bf-119302
bf-119304
bf-119305
bf-119342
bf-119345
bf-119350
bf-119351
bf-119352
bf-119371
bf-119373
bf-119381
bf-119404
bf-119421
bf-119423
bf-119431
bf-119432
bf-119471
bf-119473
bf-119476
bf-119478
bf-119483
bf-119496
bf-119497
bf-119502
bf-119508
bf-119517
bf-119518
bf-119519
bf-119522
bf-119523
bf-119524
bf-119530
bf-119537
bf-119542
bf-119545
bf-119549
bf-119559
bf-119566
bf-119568
bf-119569
bf-119570
bf-119573
bf-119574
bf-119581
bf-119585
bf-119591
bf-119613
bf-119616
bf-119617
bf-119623
bf-119625
bf-119627
bf-119650
bf-119651
bf-119658
bf-119694
bf-119697
bf-119698
bf-119700
bf-119701
bf-119704
bf-119705
bf-119711
bf-119718
bf-119723
bf-119724
bf-119726
bf-119727
bf-119739
bf-119742
bf-119743
bf-119756
bf-119758
bf-119761
bf-119764
bf-119767
bf-119771
bf-119774
bf-119780
bf-119782
bf-119783
bf-119788
bf-119789
bf-119799
bf-119810
bf-119830
bf-119842
bf-119843
bf-119845
bf-119852
bf-119857
bf-119862
bf-119863
bf-119869
bf-119888
bf-119894
bf-119896
bf-119899
bf-119902
bf-119904
bf-119906
bf-119937
bf-119955
bf-119969
bf-119973
bf-119978
bf-119982
bf-119983
bf-120041
bf-120047
bf-120061
bf-120065
bf-120074
bf-120079
bf-120081
bf-120092
bf-120095
bf-120096
bf-120105
bf-120109
bf-120126
bf-120127
bf-120131
bf-120132
bf-120133
bf-120134
bf-120136
bf-120139
bf-120140
bf-120142
bf-120146
bf-120153
bf-120154
bf-120155
bf-120158
bf-120187
bf-120194
bf-120207
bf-120208
bf-120211
bf-120215
bf-120228
bf-120234
bf-120240
bf-120244
bf-120249
bf-120252
bf-120267
bf-120270
bf-120310
bf-120324
bf-120326
bf-120328
bf-120330
bf-120331
bf-120332
bf-120334
bf-120347
bf-120363
bf-120381
bf-120388
bf-120392
bf-120393
bf-120398
bf-120431
bf-120476
bf-120478
bf-120480
bf-120481
bf-120482
bf-120486
bf-120487
bf-120491
bf-120515
bf-120517
bf-120519
bf-120522
bf-120573
bf-120574
bf-120575
bf-120585
bf-120589
bf-120597
bf-120598
bf-120599
bf-120600
bf-120616
bf-120619
bf-120627
bf-120630
bf-120636
bf-120643
bf-120661
bf-120663
bf-120668
bf-120671
bf-120675
bf-120696
bf-120702
bf-120730
bf-120737
bf-120738
bf-120742
bf-120761
bf-120763
bf-120766
bf-120767
bf-120770
bf-120772
bf-120774
bf-120788
bf-120818
bf-120826
bf-120830
bf-120840
bf-120841
bf-120845
bf-120848
bf-120853
bf-120860
bf-120861
bf-120888
bf-120894
bf-120900
bf-120901
bf-120904
bf-120906
bf-120908
bf-120911
bf-120915
bf-120923
bf-120930
bf-120970
bf-120973
bf-120980
bf-120981
bf-120982
bf-120990
bf-120994
bf-120995
bf-120997
bf-121009
bf-121016
bf-121017
bf-121021
bf-121025
bf-121031
bf-121043
bf-121057
bf-121062
bf-121072
bf-121075
bf-121076
bf-121082
bf-121087
bf-121089
bf-121090
bf-121092
bf-121097
bf-121098
bf-121099
bf-121112
bf-121114
bf-121119
bf-121136
bf-121137
bf-121138
bf-121147
bf-121149
bf-121151
bf-121154
bf-121165
bf-121166
bf-121168
bf-121170
bf-121172
bf-121174
bf-121175
bf-121176
bf-121183
bf-121184
bf-121188
bf-121193
bf-121199
bf-121200
bf-121233
bf-121236
bf-121242
bf-121247
bf-121248
bf-121251
bf-121252
bf-121253
bf-121255
bf-121259
bf-121261
bf-121263
bf-121267
bf-121298
bf-121299
bf-121302
bf-121307
bf-121309
bf-121312
bf-121313
bf-121314
bf-121315
bf-121324
bf-121333
bf-121335
bf-121336
bf-121337
bf-121345
bf-121351
bf-121353
bf-121360
bf-121366
bf-121367
bf-121368
bf-121374
bf-121376
bf-121378
bf-121385
bf-121400
bf-121402
bf-121405
bf-121407
bf-121409
bf-121416
bf-121417
bf-121426
bf-121427
bf-121435
bf-121450
bf-121462
bf-121463
bf-121465
bf-121468
bf-121473
bf-121484
bf-121485
bf-121488
bf-121490
bf-121493
bf-121500
bf-121501
bf-121502
bf-121505
bf-121517
bf-121524
bf-121525
bf-121527
bf-121545
bf-121562
bf-121580
bf-121581
bf-121593
bf-121595
bf-121619
bf-121621
bf-121630
bf-121640
bf-121641
bf-121645
bf-121654
bf-121655
bf-121667
bf-121671
bf-121677
bf-121685
bf-121689
bf-121691
bf-121694
bf-121701
bf-121706
bf-121709
bf-121736
bf-121739
bf-121741
bf-121746
bf-121749
bf-121756
bf-121759
bf-121761
bf-121762
bf-121764
bf-121774
bf-121776
bf-121777
bf-121782
bf-121797
bf-121802
bf-121818
bf-121819
bf-121821
bf-121822
bf-121824
bf-121828
bf-121833
bf-121840
bf-121844
bf-121860
bf-121872
bf-121874
bf-121882
bf-121883
bf-121885
bf-121886
[truncated: 11,139 more rows]

## Sheet: Ciona intestinalis
ENSCING00000000010
ENSCING00000000012
ENSCING00000000017
ENSCING00000000018
ENSCING00000000019
ENSCING00000000028
ENSCING00000000033
ENSCING00000000034
ENSCING00000000035
ENSCING00000000039
ENSCING00000000040
ENSCING00000000042
ENSCING00000000046
ENSCING00000000047
ENSCING00000000048
ENSCING00000000050
ENSCING00000000060
ENSCING00000000061
ENSCING00000000065
ENSCING00000000067
ENSCING00000000068
ENSCING00000000071
ENSCING00000000073
ENSCING00000000075
ENSCING00000000079
ENSCING00000000082
ENSCING00000000085
ENSCING00000000087
ENSCING00000000089
ENSCING00000000092
ENSCING00000000096
ENSCING00000000097
ENSCING00000000098
ENSCING00000000099
ENSCING00000000101
ENSCING00000000111
ENSCING00000000113
ENSCING00000000116
ENSCING00000000117
ENSCING00000000122
ENSCING00000000123
ENSCING00000000128
ENSCING00000000130
ENSCING00000000132
ENSCING00000000140
ENSCING00000000142
ENSCING00000000151
ENSCING00000000152
ENSCING00000000153
ENSCING00000000162
ENSCING00000000163
ENSCING00000000166
ENSCING00000000168
ENSCING00000000169
ENSCING00000000170
ENSCING00000000171
ENSCING00000000174
ENSCING00000000177
ENSCING00000000179
ENSCING00000000180
ENSCING00000000181
ENSCING00000000182
ENSCING00000000185
ENSCING00000000186
ENSCING00000000188
ENSCING00000000190
ENSCING00000000191
ENSCING00000000195
ENSCING00000000198
ENSCING00000000199
ENSCING00000000200
ENSCING00000000202
ENSCING00000000204
ENSCING00000000205
ENSCING00000000207
ENSCING00000000208
ENSCING00000000210
ENSCING00000000213
ENSCING00000000219
ENSCING00000000220
ENSCING00000000221
ENSCING00000000226
ENSCING00000000231
ENSCING00000000233
ENSCING00000000234
ENSCING00000000238
ENSCING00000000239
ENSCING00000000241
ENSCING00000000245
ENSCING00000000252
ENSCING00000000253
ENSCING00000000254
ENSCING00000000257
ENSCING00000000258
ENSCING00000000269
ENSCING00000000271
ENSCING00000000272
ENSCING00000000273
ENSCING00000000276
ENSCING00000000282
ENSCING00000000283
ENSCING00000000284
ENSCING00000000288
ENSCING00000000290
ENSCING00000000291
ENSCING00000000292
ENSCING00000000293
ENSCING00000000294
ENSCING00000000295
ENSCING00000000297
ENSCING00000000301
ENSCING00000000303
ENSCING00000000304
ENSCING00000000305
ENSCING00000000306
ENSCING00000000307
ENSCING00000000308
ENSCING00000000310
ENSCING00000000311
ENSCING00000000312
ENSCING00000000315
ENSCING00000000316
ENSCING00000000317
ENSCING00000000318
ENSCING00000000320
ENSCING00000000321
ENSCING00000000323
ENSCING00000000328
ENSCING00000000330
ENSCING00000000331
ENSCING00000000333
ENSCING00000000334
ENSCING00000000335
ENSCING00000000336
ENSCING00000000337
ENSCING00000000338
ENSCING00000000345
ENSCING00000000347
ENSCING00000000348
ENSCING00000000352
ENSCING00000000355
ENSCING00000000358
ENSCING00000000359
ENSCING00000000360
ENSCING00000000363
ENSCING00000000367
ENSCING00000000371
ENSCING00000000378
ENSCING00000000379
ENSCING00000000382
ENSCING00000000383
ENSCING00000000384
ENSCING00000000385
ENSCING00000000386
ENSCING00000000389
ENSCING00000000391
ENSCING00000000394
ENSCING00000000395
ENSCING00000000396
ENSCING00000000397
ENSCING00000000399
ENSCING00000000400
ENSCING00000000404
ENSCING00000000405
ENSCING00000000407
ENSCING00000000409
ENSCING00000000410
ENSCING00000000413
ENSCING00000000415
ENSCING00000000417
ENSCING00000000418
ENSCING00000000419
ENSCING00000000420
ENSCING00000000421
ENSCING00000000422
ENSCING00000000423
ENSCING00000000424
ENSCING00000000425
ENSCING00000000429
ENSCING00000000430
ENSCING00000000431
ENSCING00000000433
ENSCING00000000437
ENSCING00000000442
ENSCING00000000446
ENSCING00000000448
ENSCING00000000453
ENSCING00000000455
ENSCING00000000461
ENSCING00000000463
ENSCING00000000466
ENSCING00000000467
ENSCING00000000469
ENSCING00000000473
ENSCING00000000478
ENSCING00000000481
ENSCING00000000485
ENSCING00000000487
ENSCING00000000488
ENSCING00000000489
ENSCING00000000490
ENSCING00000000491
ENSCING00000000492
ENSCING00000000496
ENSCING00000000498
ENSCING00000000501
ENSCING00000000502
ENSCING00000000504
ENSCING00000000509
ENSCING00000000511
ENSCING00000000512
ENSCING00000000514
ENSCING00000000516
ENSCING00000000529
ENSCING00000000531
ENSCING00000000532
ENSCING00000000533
ENSCING00000000534
ENSCING00000000538
ENSCING00000000539
ENSCING00000000540
ENSCING00000000542
ENSCING00000000543
ENSCING00000000546
ENSCING00000000549
ENSCING00000000550
ENSCING00000000551
ENSCING00000000552
ENSCING00000000553
ENSCING00000000556
ENSCING00000000560
ENSCING00000000566
ENSCING00000000567
ENSCING00000000570
ENSCING00000000572
ENSCING00000000574
ENSCING00000000576
ENSCING00000000577
ENSCING00000000579
ENSCING00000000585
ENSCING00000000588
ENSCING00000000589
ENSCING00000000590
ENSCING00000000597
ENSCING00000000599
ENSCING00000000605
ENSCING00000000607
ENSCING00000000609
ENSCING00000000615
ENSCING00000000618
ENSCING00000000622
ENSCING00000000623
ENSCING00000000624
ENSCING00000000625
ENSCING00000000626
ENSCING00000000627
ENSCING00000000628
ENSCING00000000630
ENSCING00000000632
ENSCING00000000633
ENSCING00000000634
ENSCING00000000635
ENSCING00000000636
ENSCING00000000638
ENSCING00000000639
ENSCING00000000643
ENSCING00000000645
ENSCING00000000649
ENSCING00000000650
ENSCING00000000653
ENSCING00000000654
ENSCING00000000657
ENSCING00000000661
ENSCING00000000662
ENSCING00000000668
ENSCING00000000670
ENSCING00000000673
ENSCING00000000676
ENSCING00000000677
ENSCING00000000680
ENSCING00000000682
ENSCING00000000684
ENSCING00000000685
ENSCING00000000686
ENSCING00000000689
ENSCING00000000693
ENSCING00000000694
ENSCING00000000695
ENSCING00000000696
ENSCING00000000703
ENSCING00000000704
ENSCING00000000705
ENSCING00000000706
ENSCING00000000707
ENSCING00000000710
ENSCING00000000711
ENSCING00000000714
ENSCING00000000716
ENSCING00000000717
ENSCING00000000718
ENSCING00000000719
ENSCING00000000720
ENSCING00000000722
ENSCING00000000723
ENSCING00000000724
ENSCING00000000728
ENSCING00000000730
ENSCING00000000731
ENSCING00000000734
ENSCING00000000736
ENSCING00000000739
ENSCING00000000740
ENSCING00000000741
ENSCING00000000742
ENSCING00000000743
ENSCING00000000744
ENSCING00000000748
ENSCING00000000752
ENSCING00000000755
ENSCING00000000757
ENSCING00000000760
ENSCING00000000769
ENSCING00000000770
ENSCING00000000771
ENSCING00000000773
ENSCING00000000778
ENSCING00000000779
ENSCING00000000781
ENSCING00000000787
ENSCING00000000790
ENSCING00000000792
ENSCING00000000798
ENSCING00000000808
ENSCING00000000810
ENSCING00000000814
ENSCING00000000815
ENSCING00000000821
ENSCING00000000827
ENSCING00000000828
ENSCING00000000829
ENSCING00000000830
ENSCING00000000832
ENSCING00000000837
ENSCING00000000838
ENSCING00000000839
ENSCING00000000841
ENSCING00000000843
ENSCING00000000844
ENSCING00000000846
ENSCING00000000848
ENSCING00000000852
ENSCING00000000854
ENSCING00000000861
ENSCING00000000863
ENSCING00000000864
ENSCING00000000867
ENSCING00000000868
ENSCING00000000871
ENSCING00000000875
ENSCING00000000881
ENSCING00000000882
ENSCING00000000884
ENSCING00000000885
ENSCING00000000889
ENSCING00000000890
ENSCING00000000891
ENSCING00000000893
ENSCING00000000894
ENSCING00000000895
ENSCING00000000897
ENSCING00000000898
ENSCING00000000899
ENSCING00000000901
ENSCING00000000902
ENSCING00000000903
ENSCING00000000904
ENSCING00000000907
ENSCING00000000910
ENSCING00000000911
ENSCING00000000912
ENSCING00000000913
ENSCING00000000914
ENSCING00000000917
ENSCING00000000919
ENSCING00000000921
ENSCING00000000922
ENSCING00000000924
ENSCING00000000926
ENSCING00000000931
ENSCING00000000933
ENSCING00000000934
ENSCING00000000935
ENSCING00000000936
ENSCING00000000937
ENSCING00000000939
ENSCING00000000941
ENSCING00000000950
ENSCING00000000951
ENSCING00000000953
ENSCING00000000955
ENSCING00000000956
ENSCING00000000960
ENSCING00000000962
ENSCING00000000963
ENSCING00000000967
ENSCING00000000968
ENSCING00000000971
ENSCING00000000974
ENSCING00000000977
ENSCING00000000979
ENSCING00000000988
ENSCING00000000991
ENSCING00000000992
ENSCING00000000994
ENSCING00000000995
ENSCING00000001002
ENSCING00000001004
ENSCING00000001006
ENSCING00000001009
ENSCING00000001010
ENSCING00000001011
ENSCING00000001012
ENSCING00000001014
ENSCING00000001016
ENSCING00000001017
ENSCING00000001019
ENSCING00000001021
ENSCING00000001025
ENSCING00000001027
ENSCING00000001030
ENSCING00000001033
ENSCING00000001041
ENSCING00000001042
ENSCING00000001043
ENSCING00000001044
ENSCING00000001045
ENSCING00000001046
ENSCING00000001048
ENSCING00000001049
ENSCING00000001050
ENSCING00000001054
ENSCING00000001056
ENSCING00000001057
ENSCING00000001059
ENSCING00000001066
ENSCING00000001067
ENSCING00000001074
ENSCING00000001075
ENSCING00000001078
ENSCING00000001079
ENSCING00000001081
ENSCING00000001082
ENSCING00000001083
ENSCING00000001084
ENSCING00000001085
ENSCING00000001086
ENSCING00000001092
ENSCING00000001094
ENSCING00000001096
ENSCING00000001098
ENSCING00000001100
ENSCING00000001101
ENSCING00000001104
ENSCING00000001107
ENSCING00000001109
ENSCING00000001112
ENSCING00000001116
ENSCING00000001117
ENSCING00000001118
ENSCING00000001119
ENSCING00000001122
ENSCING00000001123
ENSCING00000001124
ENSCING00000001128
ENSCING00000001130
ENSCING00000001131
ENSCING00000001133
ENSCING00000001135
ENSCING00000001138
ENSCING00000001140
ENSCING00000001141
ENSCING00000001142
ENSCING00000001143
ENSCING00000001145
ENSCING00000001147
ENSCING00000001148
ENSCING00000001150
ENSCING00000001151
ENSCING00000001152
ENSCING00000001153
ENSCING00000001154
ENSCING00000001155
ENSCING00000001156
ENSCING00000001158
ENSCING00000001159
ENSCING00000001160
ENSCING00000001162
ENSCING00000001163
ENSCING00000001164
ENSCING00000001165
ENSCING00000001167
ENSCING00000001169
ENSCING00000001170
ENSCING00000001171
ENSCING00000001172
ENSCING00000001174
ENSCING00000001176
ENSCING00000001178
ENSCING00000001181
ENSCING00000001184
ENSCING00000001188
ENSCING00000001192
ENSCING00000001196
ENSCING00000001197
ENSCING00000001200
ENSCING00000001202
ENSCING00000001203
ENSCING00000001205
ENSCING00000001209
ENSCING00000001212
ENSCING00000001215
ENSCING00000001216
ENSCING00000001220
ENSCING00000001222
ENSCING00000001223
ENSCING00000001224
ENSCING00000001227
ENSCING00000001229
ENSCING00000001232
ENSCING00000001234
ENSCING00000001236
ENSCING00000001237
ENSCING00000001238
ENSCING00000001240
ENSCING00000001241
ENSCING00000001243
ENSCING00000001245
ENSCING00000001246
ENSCING00000001247
ENSCING00000001249
ENSCING00000001251
ENSCING00000001252
ENSCING00000001254
ENSCING00000001256
ENSCING00000001257
ENSCING00000001258
ENSCING00000001259
ENSCING00000001260
ENSCING00000001263
ENSCING00000001266
ENSCING00000001267
ENSCING00000001270
ENSCING00000001272
ENSCING00000001273
ENSCING00000001274
ENSCING00000001275
ENSCING00000001276
ENSCING00000001277
ENSCING00000001279
ENSCING00000001280
ENSCING00000001281
ENSCING00000001284
ENSCING00000001291
ENSCING00000001296
ENSCING00000001297
ENSCING00000001299
ENSCING00000001304
ENSCING00000001307
ENSCING00000001309
ENSCING00000001311
ENSCING00000001312
ENSCING00000001319
ENSCING00000001321
ENSCING00000001323
ENSCING00000001324
ENSCING00000001325
ENSCING00000001326
ENSCING00000001327
ENSCING00000001328
ENSCING00000001329
ENSCING00000001331
ENSCING00000001333
ENSCING00000001334
ENSCING00000001338
ENSCING00000001341
ENSCING00000001342
ENSCING00000001343
ENSCING00000001344
ENSCING00000001347
ENSCING00000001353
ENSCING00000001354
ENSCING00000001357
ENSCING00000001362
ENSCING00000001363
ENSCING00000001367
ENSCING00000001369
ENSCING00000001370
ENSCING00000001371
ENSCING00000001372
ENSCING00000001373
ENSCING00000001374
ENSCING00000001375
ENSCING00000001377
ENSCING00000001380
ENSCING00000001381
ENSCING00000001383
ENSCING00000001384
ENSCING00000001388
ENSCING00000001389
ENSCING00000001392
ENSCING00000001393
ENSCING00000001394
ENSCING00000001397
ENSCING00000001398
ENSCING00000001400
ENSCING00000001401
ENSCING00000001404
ENSCING00000001408
ENSCING00000001412
ENSCING00000001414
ENSCING00000001417
ENSCING00000001420
ENSCING00000001421
ENSCING00000001422
ENSCING00000001424
ENSCING00000001428
ENSCING00000001430
ENSCING00000001431
ENSCING00000001434
ENSCING00000001435
ENSCING00000001437
ENSCING00000001441
ENSCING00000001443
ENSCING00000001444
ENSCING00000001445
ENSCING00000001447
ENSCING00000001450
ENSCING00000001452
ENSCING00000001453
ENSCING00000001458
ENSCING00000001459
ENSCING00000001460
ENSCING00000001461
ENSCING00000001464
ENSCING00000001469
ENSCING00000001471
ENSCING00000001473
ENSCING00000001476
ENSCING00000001478
ENSCING00000001480
ENSCING00000001482
ENSCING00000001483
ENSCING00000001484
ENSCING00000001487
ENSCING00000001488
ENSCING00000001495
ENSCING00000001497
ENSCING00000001500
ENSCING00000001501
ENSCING00000001503
ENSCING00000001504
ENSCING00000001505
ENSCING00000001507
ENSCING00000001513
ENSCING00000001515
ENSCING00000001517
ENSCING00000001520
ENSCING00000001525
ENSCING00000001526
ENSCING00000001528
ENSCING00000001530
ENSCING00000001531
ENSCING00000001532
ENSCING00000001534
ENSCING00000001536
ENSCING00000001540
ENSCING00000001543
ENSCING00000001546
ENSCING00000001547
ENSCING00000001548
ENSCING00000001550
ENSCING00000001551
ENSCING00000001552
ENSCING00000001553
ENSCING00000001555
ENSCING00000001556
ENSCING00000001557
ENSCING00000001561
ENSCING00000001562
ENSCING00000001563
ENSCING00000001564
ENSCING00000001565
ENSCING00000001567
ENSCING00000001575
ENSCING00000001576
ENSCING00000001577
ENSCING00000001582
ENSCING00000001585
ENSCING00000001586
ENSCING00000001590
ENSCING00000001591
ENSCING00000001592
ENSCING00000001593
ENSCING00000001595
ENSCING00000001600
ENSCING00000001601
ENSCING00000001603
ENSCING00000001604
ENSCING00000001609
ENSCING00000001612
ENSCING00000001613
ENSCING00000001615
ENSCING00000001618
ENSCING00000001620
ENSCING00000001621
ENSCING00000001622
ENSCING00000001623
ENSCING00000001624
ENSCING00000001625
ENSCING00000001626
ENSCING00000001627
ENSCING00000001628
ENSCING00000001634
ENSCING00000001635
ENSCING00000001636
ENSCING00000001638
ENSCING00000001639
ENSCING00000001641
ENSCING00000001642
ENSCING00000001643
ENSCING00000001646
ENSCING00000001647
ENSCING00000001648
ENSCING00000001649
ENSCING00000001650
ENSCING00000001652
ENSCING00000001653
ENSCING00000001654
ENSCING00000001657
ENSCING00000001658
ENSCING00000001659
ENSCING00000001668
ENSCING00000001669
ENSCING00000001670
ENSCING00000001672
ENSCING00000001677
ENSCING00000001679
ENSCING00000001680
ENSCING00000001681
ENSCING00000001683
ENSCING00000001684
ENSCING00000001685
ENSCING00000001688
ENSCING00000001690
ENSCING00000001691
ENSCING00000001692
ENSCING00000001693
ENSCING00000001694
ENSCING00000001695
ENSCING00000001697
ENSCING00000001700
ENSCING00000001701
ENSCING00000001702
ENSCING00000001703
ENSCING00000001704
ENSCING00000001706
ENSCING00000001708
ENSCING00000001709
ENSCING00000001710
ENSCING00000001711
ENSCING00000001716
ENSCING00000001717
ENSCING00000001721
ENSCING00000001724
ENSCING00000001729
ENSCING00000001730
ENSCING00000001738
ENSCING00000001739
ENSCING00000001740
ENSCING00000001741
ENSCING00000001743
ENSCING00000001748
ENSCING00000001749
ENSCING00000001752
ENSCING00000001754
ENSCING00000001755
ENSCING00000001757
ENSCING00000001758
ENSCING00000001763
ENSCING00000001767
ENSCING00000001770
ENSCING00000001771
ENSCING00000001773
ENSCING00000001776
ENSCING00000001777
ENSCING00000001778
ENSCING00000001782
ENSCING00000001784
ENSCING00000001792
ENSCING00000001793
ENSCING00000001794
ENSCING00000001795
ENSCING00000001800
ENSCING00000001801
ENSCING00000001803
ENSCING00000001804
ENSCING00000001808
ENSCING00000001809
ENSCING00000001811
ENSCING00000001816
ENSCING00000001817
ENSCING00000001818
ENSCING00000001821
ENSCING00000001824
ENSCING00000001827
ENSCING00000001828
ENSCING00000001829
ENSCING00000001830
ENSCING00000001831
ENSCING00000001832
ENSCING00000001833
ENSCING00000001835
ENSCING00000001836
ENSCING00000001837
ENSCING00000001840
ENSCING00000001841
ENSCING00000001842
ENSCING00000001844
ENSCING00000001847
ENSCING00000001849
ENSCING00000001850
ENSCING00000001853
ENSCING00000001856
ENSCING00000001858
ENSCING00000001859
ENSCING00000001863
ENSCING00000001864
ENSCING00000001867
ENSCING00000001869
ENSCING00000001872
ENSCING00000001873
ENSCING00000001874
ENSCING00000001876
ENSCING00000001877
ENSCING00000001878
ENSCING00000001879
ENSCING00000001880
ENSCING00000001882
ENSCING00000001883
ENSCING00000001886
ENSCING00000001888
ENSCING00000001889
ENSCING00000001891
ENSCING00000001892
ENSCING00000001893
ENSCING00000001896
ENSCING00000001897
ENSCING00000001900
ENSCING00000001901
ENSCING00000001903
ENSCING00000001905
ENSCING00000001907
ENSCING00000001909
ENSCING00000001911
ENSCING00000001912
ENSCING00000001913
ENSCING00000001915
ENSCING00000001918
ENSCING00000001919
ENSCING00000001920
ENSCING00000001921
ENSCING00000001922
ENSCING00000001923
ENSCING00000001924
ENSCING00000001926
ENSCING00000001927
ENSCING00000001928
ENSCING00000001929
ENSCING00000001931
ENSCING00000001932
ENSCING00000001933
ENSCING00000001934
ENSCING00000001939
ENSCING00000001941
ENSCING00000001943
ENSCING00000001947
ENSCING00000001948
ENSCING00000001951
ENSCING00000001952
ENSCING00000001953
ENSCING00000001954
ENSCING00000001956
ENSCING00000001957
ENSCING00000001960
ENSCING00000001961
ENSCING00000001965
ENSCING00000001967
ENSCING00000001970
ENSCING00000001972
ENSCING00000001976
ENSCING00000001978
ENSCING00000001979
ENSCING00000001982
ENSCING00000001983
ENSCING00000001987
ENSCING00000001988
ENSCING00000001991
ENSCING00000001992
ENSCING00000001993
ENSCING00000001994
ENSCING00000001995
ENSCING00000001996
ENSCING00000001997
ENSCING00000001998
ENSCING00000001999
ENSCING00000002002
ENSCING00000002003
ENSCING00000002005
ENSCING00000002006
ENSCING00000002007
ENSCING00000002010
ENSCING00000002011
ENSCING00000002012
ENSCING00000002013
ENSCING00000002014
ENSCING00000002015
ENSCING00000002016
ENSCING00000002018
ENSCING00000002019
ENSCING00000002020
ENSCING00000002021
ENSCING00000002022
ENSCING00000002023
ENSCING00000002024
ENSCING00000002027
ENSCING00000002029
ENSCING00000002033
ENSCING00000002034
ENSCING00000002035
ENSCING00000002039
ENSCING00000002040
ENSCING00000002041
ENSCING00000002042
ENSCING00000002046
ENSCING00000002048
ENSCING00000002050
ENSCING00000002052
ENSCING00000002054
ENSCING00000002058
ENSCING00000002059
ENSCING00000002061
ENSCING00000002065
ENSCING00000002066
ENSCING00000002067
ENSCING00000002068
ENSCING00000002069
ENSCING00000002075
ENSCING00000002076
ENSCING00000002077
ENSCING00000002080
ENSCING00000002081
ENSCING00000002083
ENSCING00000002084
ENSCING00000002088
ENSCING00000002089
ENSCING00000002090
ENSCING00000002092
ENSCING00000002093
ENSCING00000002096
ENSCING00000002098
ENSCING00000002100
ENSCING00000002102
ENSCING00000002103
ENSCING00000002105
ENSCING00000002106
ENSCING00000002107
ENSCING00000002108
ENSCING00000002109
ENSCING00000002110
ENSCING00000002112
ENSCING00000002113
ENSCING00000002114
ENSCING00000002123
ENSCING00000002124
ENSCING00000002125
ENSCING00000002129
ENSCING00000002131
ENSCING00000002132
ENSCING00000002135
ENSCING00000002136
ENSCING00000002138
ENSCING00000002139
ENSCING00000002141
ENSCING00000002142
ENSCING00000002144
ENSCING00000002145
ENSCING00000002146
ENSCING00000002147
ENSCING00000002150
ENSCING00000002152
ENSCING00000002154
ENSCING00000002157
ENSCING00000002158
ENSCING00000002160
ENSCING00000002162
ENSCING00000002163
ENSCING00000002165
ENSCING00000002166
ENSCING00000002167
ENSCING00000002168
ENSCING00000002169
ENSCING00000002170
ENSCING00000002171
ENSCING00000002173
ENSCING00000002175
ENSCING00000002176
ENSCING00000002177
ENSCING00000002179
ENSCING00000002181
ENSCING00000002182
ENSCING00000002183
ENSCING00000002184
ENSCING00000002185
ENSCING00000002188
ENSCING00000002192
ENSCING00000002194
ENSCING00000002195
ENSCING00000002196
ENSCING00000002197
ENSCING00000002198
ENSCING00000002202
ENSCING00000002203
ENSCING00000002204
ENSCING00000002207
ENSCING00000002209
ENSCING00000002211
ENSCING00000002212
ENSCING00000002213
ENSCING00000002214
ENSCING00000002219
ENSCING00000002222
ENSCING00000002223
ENSCING00000002224
ENSCING00000002227
ENSCING00000002228
ENSCING00000002231
ENSCING00000002232
ENSCING00000002238
ENSCING00000002252
ENSCING00000002253
ENSCING00000002257
ENSCING00000002259
ENSCING00000002260
ENSCING00000002261
ENSCING00000002263
ENSCING00000002265
ENSCING00000002266
ENSCING00000002268
ENSCING00000002269
ENSCING00000002271
ENSCING00000002274
ENSCING00000002278
ENSCING00000002281
ENSCING00000002282
ENSCING00000002288
ENSCING00000002291
ENSCING00000002292
ENSCING00000002294
ENSCING00000002297
ENSCING00000002299
ENSCING00000002300
ENSCING00000002304
ENSCING00000002306
ENSCING00000002307
ENSCING00000002308
ENSCING00000002315
ENSCING00000002318
ENSCING00000002319
ENSCING00000002320
ENSCING00000002321
ENSCING00000002324
ENSCING00000002325
ENSCING00000002326
ENSCING00000002329
ENSCING00000002330
ENSCING00000002333
ENSCING00000002334
ENSCING00000002335
ENSCING00000002337
ENSCING00000002342
ENSCING00000002344
ENSCING00000002349
ENSCING00000002350
ENSCING00000002352
ENSCING00000002353
ENSCING00000002354
ENSCING00000002357
ENSCING00000002358
ENSCING00000002360
ENSCING00000002361
ENSCING00000002364
ENSCING00000002366
ENSCING00000002368
ENSCING00000002369
ENSCING00000002371
ENSCING00000002372
ENSCING00000002373
ENSCING00000002374
ENSCING00000002375
ENSCING00000002376
ENSCING00000002377
ENSCING00000002378
ENSCING00000002379
ENSCING00000002381
ENSCING00000002383
ENSCING00000002388
ENSCING00000002389
ENSCING00000002390
ENSCING00000002393
ENSCING00000002394
ENSCING00000002397
ENSCING00000002398
ENSCING00000002399
ENSCING00000002400
ENSCING00000002405
ENSCING00000002406
ENSCING00000002408
ENSCING00000002409
ENSCING00000002410
ENSCING00000002411
ENSCING00000002412
ENSCING00000002414
ENSCING00000002415
ENSCING00000002417
ENSCING00000002419
ENSCING00000002420
ENSCING00000002421
ENSCING00000002422
ENSCING00000002423
ENSCING00000002425
ENSCING00000002428
ENSCING00000002429
ENSCING00000002430
ENSCING00000002431
ENSCING00000002434
ENSCING00000002435
ENSCING00000002438
ENSCING00000002439
ENSCING00000002440
ENSCING00000002442
ENSCING00000002443
ENSCING00000002444
ENSCING00000002446
ENSCING00000002448
ENSCING00000002449
ENSCING00000002451
ENSCING00000002456
ENSCING00000002457
ENSCING00000002458
ENSCING00000002461
ENSCING00000002465
ENSCING00000002467
ENSCING00000002468
ENSCING00000002469
ENSCING00000002470
ENSCING00000002472
ENSCING00000002475
ENSCING00000002476
ENSCING00000002477
ENSCING00000002481
ENSCING00000002486
ENSCING00000002487
ENSCING00000002488
ENSCING00000002491
ENSCING00000002494
ENSCING00000002496
ENSCING00000002498
ENSCING00000002503
ENSCING00000002504
ENSCING00000002507
ENSCING00000002513
ENSCING00000002514
ENSCING00000002517
ENSCING00000002521
ENSCING00000002523
ENSCING00000002524
ENSCING00000002525
ENSCING00000002527
ENSCING00000002528
ENSCING00000002529
ENSCING00000002530
ENSCING00000002531
ENSCING00000002533
ENSCING00000002534
ENSCING00000002536
ENSCING00000002540
ENSCING00000002541
ENSCING00000002542
ENSCING00000002543
ENSCING00000002546
ENSCING00000002548
ENSCING00000002549
ENSCING00000002551
ENSCING00000002552
ENSCING00000002555
ENSCING00000002556
ENSCING00000002558
ENSCING00000002559
ENSCING00000002560
ENSCING00000002561
ENSCING00000002563
ENSCING00000002566
ENSCING00000002567
ENSCING00000002569
ENSCING00000002570
ENSCING00000002571
ENSCING00000002572
ENSCING00000002577
ENSCING00000002578
ENSCING00000002579
ENSCING00000002580
ENSCING00000002582
ENSCING00000002583
ENSCING00000002584
ENSCING00000002585
ENSCING00000002587
ENSCING00000002593
ENSCING00000002594
ENSCING00000002598
ENSCING00000002599
ENSCING00000002602
ENSCING00000002603
ENSCING00000002604
ENSCING00000002605
ENSCING00000002606
ENSCING00000002607
ENSCING00000002608
ENSCING00000002610
ENSCING00000002612
ENSCING00000002614
ENSCING00000002615
ENSCING00000002620
ENSCING00000002621
ENSCING00000002622
ENSCING00000002623
ENSCING00000002624
ENSCING00000002625
ENSCING00000002626
ENSCING00000002630
ENSCING00000002632
ENSCING00000002634
ENSCING00000002637
ENSCING00000002638
ENSCING00000002644
ENSCING00000002648
ENSCING00000002649
ENSCING00000002651
ENSCING00000002652
ENSCING00000002653
ENSCING00000002654
ENSCING00000002655
ENSCING00000002656
ENSCING00000002658
ENSCING00000002659
ENSCING00000002660
ENSCING00000002661
ENSCING00000002663
ENSCING00000002664
ENSCING00000002665
ENSCING00000002666
ENSCING00000002669
ENSCING00000002670
ENSCING00000002672
ENSCING00000002674
ENSCING00000002675
ENSCING00000002676
ENSCING00000002678
ENSCING00000002679
ENSCING00000002681
ENSCING00000002683
ENSCING00000002685
ENSCING00000002686
ENSCING00000002688
ENSCING00000002689
ENSCING00000002690
ENSCING00000002691
ENSCING00000002692
ENSCING00000002693
ENSCING00000002699
ENSCING00000002700
ENSCING00000002701
ENSCING00000002702
ENSCING00000002703
ENSCING00000002706
ENSCING00000002708
ENSCING00000002709
ENSCING00000002713
ENSCING00000002716
ENSCING00000002720
ENSCING00000002722
ENSCING00000002723
ENSCING00000002726
ENSCING00000002729
ENSCING00000002730
ENSCING00000002732
ENSCING00000002733
ENSCING00000002735
ENSCING00000002736
ENSCING00000002739
ENSCING00000002741
ENSCING00000002742
ENSCING00000002744
ENSCING00000002746
ENSCING00000002747
ENSCING00000002748
ENSCING00000002749
ENSCING00000002752
ENSCING00000002753
ENSCING00000002754
ENSCING00000002757
ENSCING00000002758
ENSCING00000002759
ENSCING00000002765
ENSCING00000002766
ENSCING00000002772
ENSCING00000002776
ENSCING00000002781
ENSCING00000002782
ENSCING00000002784
ENSCING00000002787
ENSCING00000002788
ENSCING00000002790
ENSCING00000002791
ENSCING00000002793
ENSCING00000002794
ENSCING00000002796
ENSCING00000002798
ENSCING00000002799
ENSCING00000002801
ENSCING00000002802
ENSCING00000002803
ENSCING00000002804
ENSCING00000002805
ENSCING00000002806
ENSCING00000002807
ENSCING00000002809
ENSCING00000002811
ENSCING00000002812
ENSCING00000002813
ENSCING00000002814
ENSCING00000002816
ENSCING00000002817
ENSCING00000002818
ENSCING00000002819
ENSCING00000002820
ENSCING00000002821
ENSCING00000002822
ENSCING00000002823
ENSCING00000002824
ENSCING00000002826
ENSCING00000002827
ENSCING00000002828
ENSCING00000002830
ENSCING00000002832
ENSCING00000002834
ENSCING00000002837
ENSCING00000002838
ENSCING00000002840
ENSCING00000002841
ENSCING00000002842
ENSCING00000002845
ENSCING00000002846
ENSCING00000002848
ENSCING00000002850
ENSCING00000002851
ENSCING00000002852
ENSCING00000002853
ENSCING00000002854
ENSCING00000002856
ENSCING00000002858
ENSCING00000002861
ENSCING00000002862
ENSCING00000002863
ENSCING00000002864
ENSCING00000002865
ENSCING00000002866
ENSCING00000002867
ENSCING00000002868
ENSCING00000002869
ENSCING00000002871
ENSCING00000002872
ENSCING00000002874
ENSCING00000002875
ENSCING00000002877
ENSCING00000002879
ENSCING00000002880
ENSCING00000002883
ENSCING00000002884
ENSCING00000002887
ENSCING00000002888
ENSCING00000002892
ENSCING00000002894
ENSCING00000002895
ENSCING00000002896
ENSCING00000002897
ENSCING00000002905
ENSCING00000002908
ENSCING00000002910
ENSCING00000002912
ENSCING00000002913
ENSCING00000002914
ENSCING00000002916
ENSCING00000002918
ENSCING00000002924
ENSCING00000002925
ENSCING00000002929
ENSCING00000002930
ENSCING00000002933
ENSCING00000002935
ENSCING00000002936
ENSCING00000002937
ENSCING00000002938
ENSCING00000002939
ENSCING00000002942
ENSCING00000002943
ENSCING00000002945
ENSCING00000002946
ENSCING00000002947
ENSCING00000002948
ENSCING00000002951
ENSCING00000002952
ENSCING00000002955
ENSCING00000002956
ENSCING00000002959
ENSCING00000002960
ENSCING00000002961
ENSCING00000002962
ENSCING00000002963
ENSCING00000002964
ENSCING00000002965
ENSCING00000002967
ENSCING00000002969
ENSCING00000002972
ENSCING00000002977
ENSCING00000002985
ENSCING00000002986
ENSCING00000002987
ENSCING00000002990
ENSCING00000002993
ENSCING00000002994
ENSCING00000002996
ENSCING00000002999
ENSCING00000003002
ENSCING00000003006
ENSCING00000003009
ENSCING00000003010
ENSCING00000003014
ENSCING00000003015
ENSCING00000003016
ENSCING00000003017
ENSCING00000003018
ENSCING00000003020
ENSCING00000003028
ENSCING00000003029
ENSCING00000003032
ENSCING00000003034
ENSCING00000003037
ENSCING00000003040
ENSCING00000003043
ENSCING00000003045
ENSCING00000003046
ENSCING00000003055
ENSCING00000003056
ENSCING00000003058
ENSCING00000003060
ENSCING00000003062
ENSCING00000003063
ENSCING00000003066
ENSCING00000003067
ENSCING00000003068
ENSCING00000003070
ENSCING00000003072
ENSCING00000003074
ENSCING00000003075
ENSCING00000003076
ENSCING00000003077
ENSCING00000003082
ENSCING00000003085
ENSCING00000003086
ENSCING00000003087
ENSCING00000003089
ENSCING00000003090
ENSCING00000003095
ENSCING00000003098
ENSCING00000003099
ENSCING00000003100
ENSCING00000003102
ENSCING00000003103
ENSCING00000003105
ENSCING00000003107
ENSCING00000003108
ENSCING00000003109
ENSCING00000003110
ENSCING00000003111
ENSCING00000003112
ENSCING00000003113
ENSCING00000003116
ENSCING00000003117
ENSCING00000003118
ENSCING00000003119
ENSCING00000003120
ENSCING00000003121
ENSCING00000003122
ENSCING00000003124
ENSCING00000003125
ENSCING00000003128
ENSCING00000003129
ENSCING00000003131
ENSCING00000003132
ENSCING00000003133
ENSCING00000003135
ENSCING00000003136
ENSCING00000003138
ENSCING00000003141
ENSCING00000003142
ENSCING00000003143
ENSCING00000003144
ENSCING00000003145
ENSCING00000003147
ENSCING00000003151
ENSCING00000003154
ENSCING00000003155
ENSCING00000003156
ENSCING00000003158
ENSCING00000003159
ENSCING00000003161
ENSCING00000003162
ENSCING00000003163
ENSCING00000003166
ENSCING00000003174
ENSCING00000003175
ENSCING00000003177
ENSCING00000003180
ENSCING00000003181
ENSCING00000003184
ENSCING00000003187
ENSCING00000003189
ENSCING00000003191
ENSCING00000003192
ENSCING00000003195
ENSCING00000003197
ENSCING00000003199
ENSCING00000003201
ENSCING00000003202
ENSCING00000003204
ENSCING00000003205
ENSCING00000003206
ENSCING00000003207
ENSCING00000003208
ENSCING00000003209
ENSCING00000003211
ENSCING00000003213
ENSCING00000003214
ENSCING00000003215
ENSCING00000003217
ENSCING00000003218
ENSCING00000003219
ENSCING00000003221
ENSCING00000003222
ENSCING00000003223
ENSCING00000003230
ENSCING00000003231
ENSCING00000003233
ENSCING00000003235
ENSCING00000003236
ENSCING00000003237
ENSCING00000003238
ENSCING00000003239
ENSCING00000003240
ENSCING00000003241
ENSCING00000003242
ENSCING00000003244
ENSCING00000003245
ENSCING00000003246
ENSCING00000003247
ENSCING00000003250
ENSCING00000003252
ENSCING00000003255
ENSCING00000003257
ENSCING00000003260
ENSCING00000003261
ENSCING00000003267
ENSCING00000003269
ENSCING00000003270
ENSCING00000003273
ENSCING00000003274
ENSCING00000003276
ENSCING00000003277
ENSCING00000003278
ENSCING00000003279
ENSCING00000003281
ENSCING00000003282
ENSCING00000003284
ENSCING00000003286
ENSCING00000003288
ENSCING00000003290
ENSCING00000003291
ENSCING00000003292
ENSCING00000003293
ENSCING00000003296
ENSCING00000003297
ENSCING00000003302
ENSCING00000003304
ENSCING00000003305
ENSCING00000003306
ENSCING00000003309
ENSCING00000003311
ENSCING00000003312
ENSCING00000003314
ENSCING00000003315
ENSCING00000003317
ENSCING00000003319
ENSCING00000003320
ENSCING00000003322
ENSCING00000003324
ENSCING00000003326
ENSCING00000003327
ENSCING00000003328
ENSCING00000003329
ENSCING00000003331
ENSCING00000003333
ENSCING00000003335
ENSCING00000003336
ENSCING00000003340
ENSCING00000003341
ENSCING00000003342
ENSCING00000003343
ENSCING00000003345
ENSCING00000003346
ENSCING00000003347
ENSCING00000003348
ENSCING00000003349
ENSCING00000003353
ENSCING00000003355
ENSCING00000003356
ENSCING00000003358
ENSCING00000003359
ENSCING00000003362
ENSCING00000003363
ENSCING00000003365
ENSCING00000003366
ENSCING00000003367
ENSCING00000003368
ENSCING00000003371
ENSCING00000003373
ENSCING00000003377
ENSCING00000003378
ENSCING00000003379
ENSCING00000003381
ENSCING00000003382
ENSCING00000003383
ENSCING00000003384
ENSCING00000003385
ENSCING00000003388
ENSCING00000003389
ENSCING00000003390
ENSCING00000003391
ENSCING00000003393
ENSCING00000003395
ENSCING00000003396
ENSCING00000003397
ENSCING00000003407
ENSCING00000003409
ENSCING00000003410
ENSCING00000003411
ENSCING00000003415
ENSCING00000003417
ENSCING00000003418
ENSCING00000003422
ENSCING00000003423
ENSCING00000003424
ENSCING00000003426
ENSCING00000003432
ENSCING00000003433
ENSCING00000003434
ENSCING00000003435
ENSCING00000003436
ENSCING00000003438
ENSCING00000003440
ENSCING00000003442
ENSCING00000003443
ENSCING00000003447
ENSCING00000003448
ENSCING00000003449
ENSCING00000003450
ENSCING00000003453
ENSCING00000003455
ENSCING00000003456
ENSCING00000003458
ENSCING00000003459
ENSCING00000003460
ENSCING00000003461
ENSCING00000003462
ENSCING00000003464
ENSCING00000003466
ENSCING00000003467
ENSCING00000003468
ENSCING00000003470
ENSCING00000003471
ENSCING00000003473
ENSCING00000003474
ENSCING00000003475
ENSCING00000003476
ENSCING00000003478
ENSCING00000003480
ENSCING00000003481
ENSCING00000003482
ENSCING00000003483
ENSCING00000003485
ENSCING00000003486
ENSCING00000003488
ENSCING00000003493
ENSCING00000003495
ENSCING00000003499
ENSCING00000003500
ENSCING00000003501
ENSCING00000003502
ENSCING00000003504
ENSCING00000003506
ENSCING00000003511
ENSCING00000003513
ENSCING00000003515
ENSCING00000003516
ENSCING00000003517
ENSCING00000003519
ENSCING00000003527
ENSCING00000003530
ENSCING00000003531
ENSCING00000003537
ENSCING00000003538
ENSCING00000003540
ENSCING00000003542
ENSCING00000003546
ENSCING00000003548
ENSCING00000003549
ENSCING00000003550
ENSCING00000003553
ENSCING00000003555
ENSCING00000003556
ENSCING00000003557
ENSCING00000003558
ENSCING00000003559
ENSCING00000003560
ENSCING00000003562
ENSCING00000003563
ENSCING00000003567
ENSCING00000003568
ENSCING00000003570
ENSCING00000003572
ENSCING00000003573
ENSCING00000003574
ENSCING00000003577
ENSCING00000003579
ENSCING00000003581
ENSCING00000003582
ENSCING00000003583
ENSCING00000003584
ENSCING00000003585
ENSCING00000003587
ENSCING00000003588
ENSCING00000003591
ENSCING00000003593
ENSCING00000003594
ENSCING00000003595
ENSCING00000003596
ENSCING00000003597
ENSCING00000003598
ENSCING00000003599
ENSCING00000003600
ENSCING00000003601
ENSCING00000003605
ENSCING00000003608
ENSCING00000003609
ENSCING00000003610
ENSCING00000003611
ENSCING00000003612
ENSCING00000003613
ENSCING00000003614
ENSCING00000003615
ENSCING00000003618
ENSCING00000003620
ENSCING00000003621
ENSCING00000003622
ENSCING00000003625
ENSCING00000003626
ENSCING00000003627
ENSCING00000003628
ENSCING00000003630
ENSCING00000003631
ENSCING00000003633
ENSCING00000003634
ENSCING00000003638
ENSCING00000003640
ENSCING00000003643
ENSCING00000003644
ENSCING00000003645
ENSCING00000003646
ENSCING00000003648
ENSCING00000003650
ENSCING00000003651
ENSCING00000003654
ENSCING00000003655
ENSCING00000003656
ENSCING00000003657
ENSCING00000003658
ENSCING00000003659
ENSCING00000003660
ENSCING00000003661
ENSCING00000003662
ENSCING00000003663
ENSCING00000003664
ENSCING00000003665
ENSCING00000003666
ENSCING00000003669
ENSCING00000003670
ENSCING00000003672
ENSCING00000003674
ENSCING00000003676
ENSCING00000003678
ENSCING00000003679
ENSCING00000003681
ENSCING00000003683
ENSCING00000003685
ENSCING00000003686
ENSCING00000003687
ENSCING00000003689
ENSCING00000003690
ENSCING00000003691
ENSCING00000003692
ENSCING00000003693
ENSCING00000003694
ENSCING00000003699
ENSCING00000003700
ENSCING00000003702
ENSCING00000003703
ENSCING00000003704
ENSCING00000003706
ENSCING00000003707
ENSCING00000003709
ENSCING00000003711
ENSCING00000003712
ENSCING00000003713
ENSCING00000003714
ENSCING00000003718
ENSCING00000003720
ENSCING00000003721
ENSCING00000003722
ENSCING00000003723
ENSCING00000003725
ENSCING00000003726
ENSCING00000003728
ENSCING00000003731
ENSCING00000003734
ENSCING00000003736
ENSCING00000003738
ENSCING00000003740
ENSCING00000003741
ENSCING00000003742
ENSCING00000003743
ENSCING00000003744
ENSCING00000003750
ENSCING00000003751
ENSCING00000003756
ENSCING00000003759
ENSCING00000003761
ENSCING00000003762
ENSCING00000003764
ENSCING00000003765
ENSCING00000003766
ENSCING00000003768
ENSCING00000003770
ENSCING00000003771
ENSCING00000003772
ENSCING00000003777
ENSCING00000003778
ENSCING00000003779
ENSCING00000003782
ENSCING00000003783
ENSCING00000003784
ENSCING00000003785
ENSCING00000003788
ENSCING00000003789
ENSCING00000003791
ENSCING00000003792
ENSCING00000003793
ENSCING00000003794
ENSCING00000003797
ENSCING00000003798
ENSCING00000003799
ENSCING00000003801
ENSCING00000003802
ENSCING00000003803
ENSCING00000003804
ENSCING00000003805
ENSCING00000003806
ENSCING00000003807
ENSCING00000003808
ENSCING00000003809
ENSCING00000003810
ENSCING00000003812
ENSCING00000003813
ENSCING00000003814
ENSCING00000003815
ENSCING00000003816
ENSCING00000003817
ENSCING00000003818
ENSCING00000003819
ENSCING00000003820
ENSCING00000003821
ENSCING00000003822
ENSCING00000003823
ENSCING00000003824
ENSCING00000003825
ENSCING00000003826
ENSCING00000003830
ENSCING00000003831
ENSCING00000003832
ENSCING00000003836
ENSCING00000003840
ENSCING00000003845
ENSCING00000003849
ENSCING00000003851
ENSCING00000003852
ENSCING00000003853
ENSCING00000003855
ENSCING00000003858
ENSCING00000003860
ENSCING00000003861
ENSCING00000003862
ENSCING00000003863
ENSCING00000003864
ENSCING00000003865
ENSCING00000003868
ENSCING00000003869
ENSCING00000003870
ENSCING00000003872
ENSCING00000003873
ENSCING00000003874
ENSCING00000003875
ENSCING00000003877
ENSCING00000003878
ENSCING00000003879
ENSCING00000003881
ENSCING00000003882
ENSCING00000003884
ENSCING00000003888
ENSCING00000003889
ENSCING00000003891
ENSCING00000003892
ENSCING00000003893
ENSCING00000003894
ENSCING00000003895
ENSCING00000003898
ENSCING00000003899
ENSCING00000003900
ENSCING00000003901
ENSCING00000003902
ENSCING00000003904
ENSCING00000003905
ENSCING00000003907
ENSCING00000003908
ENSCING00000003909
ENSCING00000003910
ENSCING00000003912
ENSCING00000003915
ENSCING00000003919
ENSCING00000003921
ENSCING00000003926
ENSCING00000003927
ENSCING00000003929
ENSCING00000003931
ENSCING00000003933
ENSCING00000003934
ENSCING00000003935
ENSCING00000003939
ENSCING00000003943
ENSCING00000003944
ENSCING00000003945
ENSCING00000003946
ENSCING00000003948
ENSCING00000003949
ENSCING00000003950
ENSCING00000003952
ENSCING00000003953
ENSCING00000003956
ENSCING00000003958
ENSCING00000003959
ENSCING00000003961
ENSCING00000003965
ENSCING00000003966
[truncated: 12,289 more rows]

## Sheet: Crassostrea gigas
CGI_10000001
CGI_10000002
CGI_10000003
CGI_10000004
CGI_10000009
CGI_10000010
CGI_10000011
CGI_10000013
CGI_10000014
CGI_10000015
CGI_10000016
CGI_10000017
CGI_10000018
CGI_10000019
CGI_10000021
CGI_10000024
CGI_10000025
CGI_10000026
CGI_10000028
CGI_10000029
CGI_10000030
CGI_10000031
CGI_10000032
CGI_10000033
CGI_10000034
CGI_10000035
CGI_10000036
CGI_10000038
CGI_10000039
CGI_10000040
CGI_10000041
CGI_10000042
CGI_10000043
CGI_10000044
CGI_10000045
CGI_10000046
CGI_10000048
CGI_10000050
CGI_10000051
CGI_10000052
CGI_10000053
CGI_10000055
CGI_10000056
CGI_10000057
CGI_10000058
CGI_10000059
CGI_10000060
CGI_10000061
CGI_10000062
CGI_10000063
CGI_10000064
CGI_10000066
CGI_10000067
CGI_10000068
CGI_10000069
CGI_10000070
CGI_10000071
CGI_10000072
CGI_10000073
CGI_10000075
CGI_10000076
CGI_10000077
CGI_10000078
CGI_10000079
CGI_10000080
CGI_10000081
CGI_10000083
CGI_10000084
CGI_10000085
CGI_10000086
CGI_10000087
CGI_10000088
CGI_10000090
CGI_10000091
CGI_10000092
CGI_10000093
CGI_10000094
CGI_10000095
CGI_10000096
CGI_10000097
CGI_10000098
CGI_10000100
CGI_10000101
CGI_10000102
CGI_10000103
CGI_10000104
CGI_10000105
CGI_10000106
CGI_10000107
CGI_10000109
CGI_10000110
CGI_10000111
CGI_10000112
CGI_10000113
CGI_10000116
CGI_10000118
CGI_10000119
CGI_10000120
CGI_10000121
CGI_10000123
CGI_10000124
CGI_10000125
CGI_10000126
CGI_10000127
CGI_10000128
CGI_10000129
CGI_10000130
CGI_10000131
CGI_10000132
CGI_10000133
CGI_10000134
CGI_10000136
CGI_10000137
CGI_10000138
CGI_10000139
CGI_10000140
CGI_10000142
CGI_10000144
CGI_10000145
CGI_10000147
CGI_10000148
CGI_10000149
CGI_10000150
CGI_10000151
CGI_10000152
CGI_10000153
CGI_10000154
CGI_10000155
CGI_10000156
CGI_10000157
CGI_10000163
CGI_10000164
CGI_10000167
CGI_10000168
CGI_10000169
CGI_10000170
CGI_10000171
CGI_10000172
CGI_10000173
CGI_10000174
CGI_10000175
CGI_10000176
CGI_10000180
CGI_10000181
CGI_10000183
CGI_10000187
CGI_10000188
CGI_10000189
CGI_10000191
CGI_10000194
CGI_10000195
CGI_10000198
CGI_10000199
CGI_10000201
CGI_10000203
CGI_10000204
CGI_10000205
CGI_10000206
CGI_10000207
CGI_10000208
CGI_10000209
CGI_10000210
CGI_10000213
CGI_10000215
CGI_10000216
CGI_10000217
CGI_10000218
CGI_10000219
CGI_10000220
CGI_10000223
CGI_10000225
CGI_10000226
CGI_10000227
CGI_10000228
CGI_10000229
CGI_10000231
CGI_10000232
CGI_10000235
CGI_10000236
CGI_10000237
CGI_10000238
CGI_10000239
CGI_10000240
CGI_10000241
CGI_10000242
CGI_10000243
CGI_10000244
CGI_10000245
CGI_10000246
CGI_10000247
CGI_10000248
CGI_10000249
CGI_10000253
CGI_10000254
CGI_10000258
CGI_10000259
CGI_10000260
CGI_10000261
CGI_10000262
CGI_10000263
CGI_10000265
CGI_10000266
CGI_10000267
CGI_10000268
CGI_10000270
CGI_10000271
CGI_10000273
CGI_10000274
CGI_10000275
CGI_10000276
CGI_10000279
CGI_10000280
CGI_10000281
CGI_10000282
CGI_10000283
CGI_10000284
CGI_10000285
CGI_10000286
CGI_10000287
CGI_10000289
CGI_10000290
CGI_10000291
CGI_10000292
CGI_10000294
CGI_10000295
CGI_10000300
CGI_10000301
CGI_10000303
CGI_10000304
CGI_10000305
CGI_10000306
CGI_10000307
CGI_10000308
CGI_10000310
CGI_10000311
CGI_10000312
CGI_10000313
CGI_10000314
CGI_10000315
CGI_10000316
CGI_10000317
CGI_10000318
CGI_10000319
CGI_10000320
CGI_10000322
CGI_10000323
CGI_10000324
CGI_10000325
CGI_10000326
CGI_10000327
CGI_10000328
CGI_10000329
CGI_10000330
CGI_10000332
CGI_10000333
CGI_10000334
CGI_10000335
CGI_10000336
CGI_10000337
CGI_10000338
CGI_10000339
CGI_10000340
CGI_10000341
CGI_10000343
CGI_10000347
CGI_10000348
CGI_10000349
CGI_10000350
CGI_10000353
CGI_10000354
CGI_10000355
CGI_10000357
CGI_10000359
CGI_10000360
CGI_10000362
CGI_10000364
CGI_10000368
CGI_10000369
CGI_10000370
CGI_10000371
CGI_10000372
CGI_10000373
CGI_10000374
CGI_10000376
CGI_10000377
CGI_10000378
CGI_10000379
CGI_10000380
CGI_10000381
CGI_10000383
CGI_10000384
CGI_10000388
CGI_10000389
CGI_10000391
CGI_10000393
CGI_10000394
CGI_10000395
CGI_10000400
CGI_10000402
CGI_10000403
CGI_10000404
CGI_10000405
CGI_10000406
CGI_10000407
CGI_10000408
CGI_10000409
CGI_10000411
CGI_10000412
CGI_10000413
CGI_10000415
CGI_10000416
CGI_10000417
CGI_10000418
CGI_10000421
CGI_10000422
CGI_10000423
CGI_10000425
CGI_10000426
CGI_10000427
CGI_10000428
CGI_10000429
CGI_10000430
CGI_10000433
CGI_10000434
CGI_10000436
CGI_10000437
CGI_10000438
CGI_10000440
CGI_10000441
CGI_10000445
CGI_10000446
CGI_10000454
CGI_10000455
CGI_10000456
CGI_10000457
CGI_10000460
CGI_10000462
CGI_10000463
CGI_10000464
CGI_10000465
CGI_10000466
CGI_10000468
CGI_10000472
CGI_10000473
CGI_10000474
CGI_10000475
CGI_10000476
CGI_10000477
CGI_10000478
CGI_10000482
CGI_10000483
CGI_10000485
CGI_10000486
CGI_10000487
CGI_10000488
CGI_10000491
CGI_10000492
CGI_10000493
CGI_10000494
CGI_10000495
CGI_10000496
CGI_10000497
CGI_10000498
CGI_10000499
CGI_10000502
CGI_10000503
CGI_10000504
CGI_10000507
CGI_10000508
CGI_10000509
CGI_10000510
CGI_10000511
CGI_10000513
CGI_10000514
CGI_10000516
CGI_10000518
CGI_10000520
CGI_10000522
CGI_10000525
CGI_10000533
CGI_10000535
CGI_10000536
CGI_10000537
CGI_10000540
CGI_10000541
CGI_10000542
CGI_10000544
CGI_10000545
CGI_10000547
CGI_10000548
CGI_10000552
CGI_10000553
CGI_10000555
CGI_10000556
CGI_10000557
CGI_10000561
CGI_10000562
CGI_10000563
CGI_10000571
CGI_10000572
CGI_10000573
CGI_10000575
CGI_10000576
CGI_10000577
CGI_10000578
CGI_10000579
CGI_10000580
CGI_10000581
CGI_10000582
CGI_10000585
CGI_10000587
CGI_10000588
CGI_10000589
CGI_10000590
CGI_10000591
CGI_10000594
CGI_10000595
CGI_10000596
CGI_10000599
CGI_10000601
CGI_10000602
CGI_10000603
CGI_10000604
CGI_10000605
CGI_10000606
CGI_10000607
CGI_10000609
CGI_10000610
CGI_10000611
CGI_10000612
CGI_10000613
CGI_10000614
CGI_10000615
CGI_10000616
CGI_10000618
CGI_10000619
CGI_10000623
CGI_10000625
CGI_10000626
CGI_10000627
CGI_10000628
CGI_10000629
CGI_10000630
CGI_10000631
CGI_10000633
CGI_10000634
CGI_10000635
CGI_10000637
CGI_10000639
CGI_10000641
CGI_10000642
CGI_10000644
CGI_10000645
CGI_10000646
CGI_10000648
CGI_10000649
CGI_10000655
CGI_10000659
CGI_10000660
CGI_10000661
CGI_10000662
CGI_10000663
CGI_10000665
CGI_10000667
CGI_10000668
CGI_10000669
CGI_10000671
CGI_10000672
CGI_10000673
CGI_10000674
CGI_10000675
CGI_10000676
CGI_10000677
CGI_10000678
CGI_10000679
CGI_10000681
CGI_10000682
CGI_10000683
CGI_10000684
CGI_10000686
CGI_10000687
CGI_10000688
CGI_10000689
CGI_10000690
CGI_10000692
CGI_10000693
CGI_10000694
CGI_10000695
CGI_10000696
CGI_10000697
CGI_10000698
CGI_10000699
CGI_10000701
CGI_10000702
CGI_10000704
CGI_10000707
CGI_10000708
CGI_10000709
CGI_10000710
CGI_10000711
CGI_10000712
CGI_10000713
CGI_10000714
CGI_10000717
CGI_10000718
CGI_10000719
CGI_10000720
CGI_10000731
CGI_10000733
CGI_10000734
CGI_10000735
CGI_10000737
CGI_10000738
CGI_10000739
CGI_10000740
CGI_10000741
CGI_10000743
CGI_10000744
CGI_10000745
CGI_10000747
CGI_10000748
CGI_10000750
CGI_10000751
CGI_10000754
CGI_10000755
CGI_10000756
CGI_10000757
CGI_10000759
CGI_10000761
CGI_10000762
CGI_10000763
CGI_10000766
CGI_10000767
CGI_10000768
CGI_10000769
CGI_10000770
CGI_10000772
CGI_10000773
CGI_10000774
CGI_10000778
CGI_10000779
CGI_10000781
CGI_10000783
CGI_10000785
CGI_10000786
CGI_10000787
CGI_10000788
CGI_10000789
CGI_10000790
CGI_10000792
CGI_10000793
CGI_10000794
CGI_10000795
CGI_10000796
CGI_10000804
CGI_10000805
CGI_10000807
CGI_10000808
CGI_10000809
CGI_10000810
CGI_10000811
CGI_10000812
CGI_10000813
CGI_10000815
CGI_10000816
CGI_10000817
CGI_10000818
CGI_10000819
CGI_10000820
CGI_10000821
CGI_10000822
CGI_10000823
CGI_10000824
CGI_10000825
CGI_10000826
CGI_10000827
CGI_10000828
CGI_10000837
CGI_10000839
CGI_10000840
CGI_10000841
CGI_10000844
CGI_10000847
CGI_10000848
CGI_10000850
CGI_10000851
CGI_10000852
CGI_10000853
CGI_10000854
CGI_10000855
CGI_10000856
CGI_10000858
CGI_10000860
CGI_10000862
CGI_10000863
CGI_10000864
CGI_10000865
CGI_10000867
CGI_10000869
CGI_10000870
CGI_10000871
CGI_10000872
CGI_10000875
CGI_10000877
CGI_10000879
CGI_10000880
CGI_10000882
CGI_10000884
CGI_10000886
CGI_10000887
CGI_10000888
CGI_10000889
CGI_10000891
CGI_10000893
CGI_10000895
CGI_10000897
CGI_10000898
CGI_10000899
CGI_10000900
CGI_10000901
CGI_10000903
CGI_10000905
CGI_10000906
CGI_10000907
CGI_10000909
CGI_10000910
CGI_10000911
CGI_10000912
CGI_10000913
CGI_10000915
CGI_10000918
CGI_10000919
CGI_10000920
CGI_10000923
CGI_10000930
CGI_10000931
CGI_10000932
CGI_10000933
CGI_10000934
CGI_10000935
CGI_10000936
CGI_10000937
CGI_10000940
CGI_10000941
CGI_10000942
CGI_10000943
CGI_10000944
CGI_10000947
CGI_10000949
CGI_10000951
CGI_10000952
CGI_10000953
CGI_10000956
CGI_10000960
CGI_10000961
CGI_10000964
CGI_10000968
CGI_10000974
CGI_10000975
CGI_10000976
CGI_10000977
CGI_10000978
CGI_10000979
CGI_10000980
CGI_10000981
CGI_10000982
CGI_10000983
CGI_10000985
CGI_10000986
CGI_10000987
CGI_10000988
CGI_10000990
CGI_10000991
CGI_10000992
CGI_10000993
CGI_10000994
CGI_10000995
CGI_10000998
CGI_10000999
CGI_10001000
CGI_10001001
CGI_10001004
CGI_10001005
CGI_10001007
CGI_10001009
CGI_10001010
CGI_10001011
CGI_10001013
CGI_10001014
CGI_10001016
CGI_10001017
CGI_10001018
CGI_10001019
CGI_10001020
CGI_10001022
CGI_10001023
CGI_10001024
CGI_10001025
CGI_10001026
CGI_10001027
CGI_10001039
CGI_10001040
CGI_10001042
CGI_10001043
CGI_10001044
CGI_10001047
CGI_10001049
CGI_10001050
CGI_10001051
CGI_10001053
CGI_10001056
CGI_10001058
CGI_10001059
CGI_10001063
CGI_10001065
CGI_10001066
CGI_10001068
CGI_10001070
CGI_10001072
CGI_10001073
CGI_10001074
CGI_10001075
CGI_10001076
CGI_10001077
CGI_10001078
CGI_10001089
CGI_10001090
CGI_10001093
CGI_10001094
CGI_10001097
CGI_10001099
CGI_10001100
CGI_10001102
CGI_10001106
CGI_10001107
CGI_10001108
CGI_10001109
CGI_10001110
CGI_10001111
CGI_10001112
CGI_10001113
CGI_10001115
CGI_10001116
CGI_10001117
CGI_10001119
CGI_10001121
CGI_10001122
CGI_10001123
CGI_10001126
CGI_10001127
CGI_10001128
CGI_10001129
CGI_10001130
CGI_10001131
CGI_10001134
CGI_10001135
CGI_10001136
CGI_10001137
CGI_10001138
CGI_10001150
CGI_10001151
CGI_10001152
CGI_10001153
CGI_10001155
CGI_10001157
CGI_10001158
CGI_10001161
CGI_10001162
CGI_10001165
CGI_10001167
CGI_10001170
CGI_10001173
CGI_10001174
CGI_10001175
CGI_10001177
CGI_10001182
CGI_10001183
CGI_10001184
CGI_10001185
CGI_10001186
CGI_10001187
CGI_10001188
CGI_10001189
CGI_10001190
CGI_10001191
CGI_10001192
CGI_10001193
CGI_10001194
CGI_10001195
CGI_10001197
CGI_10001199
CGI_10001200
CGI_10001202
CGI_10001203
CGI_10001204
CGI_10001210
CGI_10001212
CGI_10001214
CGI_10001215
CGI_10001216
CGI_10001217
CGI_10001219
CGI_10001220
CGI_10001221
CGI_10001222
CGI_10001223
CGI_10001224
CGI_10001225
CGI_10001226
CGI_10001227
CGI_10001228
CGI_10001229
CGI_10001235
CGI_10001236
CGI_10001238
CGI_10001240
CGI_10001241
CGI_10001242
CGI_10001243
CGI_10001244
CGI_10001245
CGI_10001246
CGI_10001247
CGI_10001248
CGI_10001250
CGI_10001251
CGI_10001252
CGI_10001253
CGI_10001255
CGI_10001256
CGI_10001257
CGI_10001258
CGI_10001261
CGI_10001262
CGI_10001263
CGI_10001266
CGI_10001267
CGI_10001268
CGI_10001269
CGI_10001270
CGI_10001271
CGI_10001272
CGI_10001274
CGI_10001277
CGI_10001278
CGI_10001279
CGI_10001280
CGI_10001281
CGI_10001282
CGI_10001283
CGI_10001284
CGI_10001285
CGI_10001286
CGI_10001287
CGI_10001292
CGI_10001293
CGI_10001295
CGI_10001297
CGI_10001298
CGI_10001299
CGI_10001300
CGI_10001301
CGI_10001302
CGI_10001303
CGI_10001304
CGI_10001306
CGI_10001307
CGI_10001309
CGI_10001310
CGI_10001311
CGI_10001315
CGI_10001316
CGI_10001317
CGI_10001319
CGI_10001322
CGI_10001323
CGI_10001325
CGI_10001329
CGI_10001331
CGI_10001333
CGI_10001334
CGI_10001336
CGI_10001337
CGI_10001338
CGI_10001339
CGI_10001341
CGI_10001343
CGI_10001344
CGI_10001345
CGI_10001347
CGI_10001348
CGI_10001349
CGI_10001350
CGI_10001354
CGI_10001357
CGI_10001358
CGI_10001359
CGI_10001360
CGI_10001362
CGI_10001364
CGI_10001365
CGI_10001369
CGI_10001372
CGI_10001375
CGI_10001377
CGI_10001378
CGI_10001381
CGI_10001382
CGI_10001385
CGI_10001387
CGI_10001388
CGI_10001389
CGI_10001391
CGI_10001393
CGI_10001394
CGI_10001395
CGI_10001396
CGI_10001397
CGI_10001398
CGI_10001399
CGI_10001400
CGI_10001401
CGI_10001404
CGI_10001405
CGI_10001406
CGI_10001408
CGI_10001409
CGI_10001410
CGI_10001411
CGI_10001412
CGI_10001413
CGI_10001415
CGI_10001416
CGI_10001417
CGI_10001418
CGI_10001419
CGI_10001420
CGI_10001421
CGI_10001422
CGI_10001426
CGI_10001427
CGI_10001429
CGI_10001430
CGI_10001431
CGI_10001432
CGI_10001433
CGI_10001435
CGI_10001437
CGI_10001439
CGI_10001440
CGI_10001441
CGI_10001443
CGI_10001444
CGI_10001445
CGI_10001447
CGI_10001449
CGI_10001450
CGI_10001451
CGI_10001453
CGI_10001455
CGI_10001457
CGI_10001458
CGI_10001460
CGI_10001462
CGI_10001463
CGI_10001464
CGI_10001465
CGI_10001466
CGI_10001467
CGI_10001468
CGI_10001470
CGI_10001471
CGI_10001472
CGI_10001473
CGI_10001474
CGI_10001475
CGI_10001476
CGI_10001478
CGI_10001482
CGI_10001483
CGI_10001486
CGI_10001489
CGI_10001490
CGI_10001491
CGI_10001493
CGI_10001496
CGI_10001497
CGI_10001498
CGI_10001500
CGI_10001503
CGI_10001504
CGI_10001505
CGI_10001507
CGI_10001508
CGI_10001509
CGI_10001510
CGI_10001511
CGI_10001512
CGI_10001513
CGI_10001514
CGI_10001515
CGI_10001516
CGI_10001517
CGI_10001519
CGI_10001520
CGI_10001521
CGI_10001522
CGI_10001524
CGI_10001526
CGI_10001529
CGI_10001532
CGI_10001535
CGI_10001538
CGI_10001539
CGI_10001540
CGI_10001541
CGI_10001542
CGI_10001544
CGI_10001545
CGI_10001546
CGI_10001547
CGI_10001550
CGI_10001551
CGI_10001552
CGI_10001553
CGI_10001554
CGI_10001555
CGI_10001558
CGI_10001559
CGI_10001560
CGI_10001561
CGI_10001562
CGI_10001563
CGI_10001565
CGI_10001567
CGI_10001568
CGI_10001569
CGI_10001571
CGI_10001572
CGI_10001573
CGI_10001574
CGI_10001576
CGI_10001578
CGI_10001580
CGI_10001581
CGI_10001584
CGI_10001585
CGI_10001586
CGI_10001587
CGI_10001588
CGI_10001589
CGI_10001590
CGI_10001591
CGI_10001592
CGI_10001595
CGI_10001597
CGI_10001599
CGI_10001601
CGI_10001603
CGI_10001605
CGI_10001607
CGI_10001608
CGI_10001609
CGI_10001611
CGI_10001612
CGI_10001613
CGI_10001614
CGI_10001615
CGI_10001616
CGI_10001617
CGI_10001618
CGI_10001619
CGI_10001620
CGI_10001622
CGI_10001623
CGI_10001625
CGI_10001626
CGI_10001627
CGI_10001630
CGI_10001631
CGI_10001632
CGI_10001633
CGI_10001634
CGI_10001635
CGI_10001636
CGI_10001638
CGI_10001639
CGI_10001640
CGI_10001641
CGI_10001643
CGI_10001644
CGI_10001645
CGI_10001646
CGI_10001647
CGI_10001648
CGI_10001650
CGI_10001653
CGI_10001654
CGI_10001657
CGI_10001658
CGI_10001659
CGI_10001660
CGI_10001661
CGI_10001662
CGI_10001663
CGI_10001664
CGI_10001666
CGI_10001667
CGI_10001673
CGI_10001675
CGI_10001699
CGI_10001702
CGI_10001705
CGI_10001706
CGI_10001710
CGI_10001711
CGI_10001712
CGI_10001713
CGI_10001715
CGI_10001716
CGI_10001717
CGI_10001718
CGI_10001734
CGI_10001735
CGI_10001737
CGI_10001740
CGI_10001741
CGI_10001743
CGI_10001745
CGI_10001746
CGI_10001747
CGI_10001748
CGI_10001749
CGI_10001761
CGI_10001762
CGI_10001763
CGI_10001768
CGI_10001769
CGI_10001770
CGI_10001774
CGI_10001776
CGI_10001777
CGI_10001778
CGI_10001780
CGI_10001782
CGI_10001784
CGI_10001786
CGI_10001788
CGI_10001789
CGI_10001790
CGI_10001791
CGI_10001792
CGI_10001793
CGI_10001794
CGI_10001795
CGI_10001796
CGI_10001797
CGI_10001798
CGI_10001799
CGI_10001800
CGI_10001801
CGI_10001802
CGI_10001803
CGI_10001805
CGI_10001806
CGI_10001807
CGI_10001808
CGI_10001809
CGI_10001810
CGI_10001811
CGI_10001814
CGI_10001815
CGI_10001816
CGI_10001817
CGI_10001818
CGI_10001819
CGI_10001820
CGI_10001822
CGI_10001823
CGI_10001824
CGI_10001825
CGI_10001826
CGI_10001827
CGI_10001829
CGI_10001830
CGI_10001831
CGI_10001832
CGI_10001834
CGI_10001836
CGI_10001837
CGI_10001839
CGI_10001841
CGI_10001842
CGI_10001843
CGI_10001845
CGI_10001846
CGI_10001847
CGI_10001848
CGI_10001849
CGI_10001850
CGI_10001852
CGI_10001853
CGI_10001854
CGI_10001855
CGI_10001856
CGI_10001858
CGI_10001859
CGI_10001861
CGI_10001863
CGI_10001869
CGI_10001870
CGI_10001871
CGI_10001872
CGI_10001873
CGI_10001874
CGI_10001875
CGI_10001876
CGI_10001877
CGI_10001878
CGI_10001881
CGI_10001882
CGI_10001888
CGI_10001889
CGI_10001890
CGI_10001891
CGI_10001910
CGI_10001911
CGI_10001912
CGI_10001928
CGI_10001929
CGI_10001931
CGI_10001933
CGI_10001934
CGI_10001936
CGI_10001938
CGI_10001942
CGI_10001943
CGI_10001970
CGI_10001975
CGI_10001976
CGI_10001977
CGI_10001978
CGI_10001979
CGI_10001981
CGI_10001985
CGI_10001986
CGI_10001987
CGI_10001988
CGI_10002008
CGI_10002009
CGI_10002010
CGI_10002011
CGI_10002014
CGI_10002015
CGI_10002016
CGI_10002017
CGI_10002018
CGI_10002020
CGI_10002022
CGI_10002023
CGI_10002025
CGI_10002026
CGI_10002027
CGI_10002028
CGI_10002029
CGI_10002030
CGI_10002031
CGI_10002032
CGI_10002033
CGI_10002034
CGI_10002037
CGI_10002038
CGI_10002039
CGI_10002040
CGI_10002041
CGI_10002046
CGI_10002048
CGI_10002049
CGI_10002065
CGI_10002066
CGI_10002067
CGI_10002068
CGI_10002069
CGI_10002070
CGI_10002071
CGI_10002074
CGI_10002097
CGI_10002098
CGI_10002100
CGI_10002101
CGI_10002102
CGI_10002103
CGI_10002104
CGI_10002106
CGI_10002107
CGI_10002108
CGI_10002109
CGI_10002110
CGI_10002111
CGI_10002112
CGI_10002117
CGI_10002140
CGI_10002141
CGI_10002142
CGI_10002143
CGI_10002145
CGI_10002146
CGI_10002147
CGI_10002150
CGI_10002151
CGI_10002153
CGI_10002154
CGI_10002155
CGI_10002156
CGI_10002158
CGI_10002159
CGI_10002160
CGI_10002161
CGI_10002162
CGI_10002165
CGI_10002167
CGI_10002168
CGI_10002169
CGI_10002170
CGI_10002171
CGI_10002172
CGI_10002173
CGI_10002175
CGI_10002177
CGI_10002178
CGI_10002179
CGI_10002180
CGI_10002181
CGI_10002182
CGI_10002184
CGI_10002185
CGI_10002187
CGI_10002191
CGI_10002192
CGI_10002194
CGI_10002196
CGI_10002214
CGI_10002215
CGI_10002217
CGI_10002218
CGI_10002220
CGI_10002222
CGI_10002223
CGI_10002224
CGI_10002225
CGI_10002226
CGI_10002228
CGI_10002229
CGI_10002230
CGI_10002231
CGI_10002232
CGI_10002233
CGI_10002234
CGI_10002235
CGI_10002236
CGI_10002237
CGI_10002238
CGI_10002239
CGI_10002240
CGI_10002242
CGI_10002243
CGI_10002244
CGI_10002245
CGI_10002246
CGI_10002247
CGI_10002248
CGI_10002250
CGI_10002251
CGI_10002254
CGI_10002256
CGI_10002257
CGI_10002261
CGI_10002264
CGI_10002265
CGI_10002266
CGI_10002283
CGI_10002285
CGI_10002287
CGI_10002289
CGI_10002290
CGI_10002291
CGI_10002292
CGI_10002293
CGI_10002294
CGI_10002295
CGI_10002296
CGI_10002297
CGI_10002298
CGI_10002299
CGI_10002303
CGI_10002304
CGI_10002306
CGI_10002307
CGI_10002308
CGI_10002309
CGI_10002310
CGI_10002311
CGI_10002314
CGI_10002315
CGI_10002316
CGI_10002317
CGI_10002318
CGI_10002319
CGI_10002321
CGI_10002322
CGI_10002323
CGI_10002324
CGI_10002326
CGI_10002327
CGI_10002328
CGI_10002329
CGI_10002330
CGI_10002331
CGI_10002332
CGI_10002334
CGI_10002335
CGI_10002336
CGI_10002339
CGI_10002340
CGI_10002341
CGI_10002342
CGI_10002343
CGI_10002345
CGI_10002347
CGI_10002348
CGI_10002349
CGI_10002351
CGI_10002352
CGI_10002353
CGI_10002355
CGI_10002356
CGI_10002358
CGI_10002359
CGI_10002360
CGI_10002361
CGI_10002363
CGI_10002365
CGI_10002366
CGI_10002367
CGI_10002369
CGI_10002370
CGI_10002372
CGI_10002373
CGI_10002374
CGI_10002375
CGI_10002376
CGI_10002377
CGI_10002379
CGI_10002380
CGI_10002381
CGI_10002382
CGI_10002383
CGI_10002384
CGI_10002385
CGI_10002386
CGI_10002387
CGI_10002388
CGI_10002389
CGI_10002391
CGI_10002392
CGI_10002394
CGI_10002395
CGI_10002396
CGI_10002397
CGI_10002400
CGI_10002402
CGI_10002404
CGI_10002405
CGI_10002406
CGI_10002407
CGI_10002410
CGI_10002411
CGI_10002412
CGI_10002413
CGI_10002416
CGI_10002417
CGI_10002418
CGI_10002419
CGI_10002420
CGI_10002421
CGI_10002422
CGI_10002423
CGI_10002424
CGI_10002425
CGI_10002426
CGI_10002427
CGI_10002429
CGI_10002430
CGI_10002431
CGI_10002432
CGI_10002434
CGI_10002435
CGI_10002436
CGI_10002438
CGI_10002439
CGI_10002441
CGI_10002445
CGI_10002446
CGI_10002447
CGI_10002449
CGI_10002453
CGI_10002454
CGI_10002455
CGI_10002456
CGI_10002457
CGI_10002458
CGI_10002459
CGI_10002461
CGI_10002462
CGI_10002464
CGI_10002465
CGI_10002466
CGI_10002468
CGI_10002469
CGI_10002470
CGI_10002471
CGI_10002474
CGI_10002475
CGI_10002476
CGI_10002477
CGI_10002478
CGI_10002480
CGI_10002484
CGI_10002486
CGI_10002487
CGI_10002491
CGI_10002492
CGI_10002494
CGI_10002498
CGI_10002499
CGI_10002500
CGI_10002502
CGI_10002503
CGI_10002504
CGI_10002505
CGI_10002506
CGI_10002508
CGI_10002509
CGI_10002510
CGI_10002511
CGI_10002512
CGI_10002513
CGI_10002514
CGI_10002515
CGI_10002518
CGI_10002519
CGI_10002520
CGI_10002523
CGI_10002524
CGI_10002525
CGI_10002526
CGI_10002527
CGI_10002528
CGI_10002529
CGI_10002531
CGI_10002533
CGI_10002534
CGI_10002541
CGI_10002542
CGI_10002543
CGI_10002545
CGI_10002546
CGI_10002547
CGI_10002548
CGI_10002549
CGI_10002550
CGI_10002553
CGI_10002554
CGI_10002555
CGI_10002556
CGI_10002557
CGI_10002558
CGI_10002559
CGI_10002560
CGI_10002561
CGI_10002563
CGI_10002564
CGI_10002567
CGI_10002568
CGI_10002571
CGI_10002572
CGI_10002573
CGI_10002574
CGI_10002575
CGI_10002576
CGI_10002582
CGI_10002583
CGI_10002584
CGI_10002585
CGI_10002586
CGI_10002587
CGI_10002589
CGI_10002592
CGI_10002593
CGI_10002594
CGI_10002595
CGI_10002596
CGI_10002597
CGI_10002599
CGI_10002600
CGI_10002601
CGI_10002602
CGI_10002604
CGI_10002606
CGI_10002607
CGI_10002608
CGI_10002609
CGI_10002612
CGI_10002614
CGI_10002615
CGI_10002617
CGI_10002619
CGI_10002620
CGI_10002621
CGI_10002625
CGI_10002627
CGI_10002629
CGI_10002630
CGI_10002631
CGI_10002632
CGI_10002633
CGI_10002634
CGI_10002640
CGI_10002641
CGI_10002642
CGI_10002644
CGI_10002645
CGI_10002646
CGI_10002649
CGI_10002650
CGI_10002651
CGI_10002652
CGI_10002654
CGI_10002655
CGI_10002657
CGI_10002658
CGI_10002659
CGI_10002660
CGI_10002661
CGI_10002662
CGI_10002663
CGI_10002664
CGI_10002665
CGI_10002666
CGI_10002667
CGI_10002668
CGI_10002669
CGI_10002670
CGI_10002671
CGI_10002672
CGI_10002674
CGI_10002675
CGI_10002681
CGI_10002685
CGI_10002686
CGI_10002687
CGI_10002688
CGI_10002689
CGI_10002690
CGI_10002691
CGI_10002694
CGI_10002695
CGI_10002696
CGI_10002697
CGI_10002698
CGI_10002699
CGI_10002700
CGI_10002701
CGI_10002702
CGI_10002703
CGI_10002704
CGI_10002705
CGI_10002706
CGI_10002708
CGI_10002713
CGI_10002714
CGI_10002715
CGI_10002717
CGI_10002718
CGI_10002719
CGI_10002721
CGI_10002722
CGI_10002724
CGI_10002725
CGI_10002726
CGI_10002728
CGI_10002729
CGI_10002731
CGI_10002732
CGI_10002733
CGI_10002734
CGI_10002737
CGI_10002738
CGI_10002740
CGI_10002741
CGI_10002742
CGI_10002743
CGI_10002747
CGI_10002748
CGI_10002749
CGI_10002750
CGI_10002751
CGI_10002753
CGI_10002754
CGI_10002755
CGI_10002756
CGI_10002758
CGI_10002762
CGI_10002763
CGI_10002764
CGI_10002765
CGI_10002766
CGI_10002767
CGI_10002768
CGI_10002769
CGI_10002771
CGI_10002772
CGI_10002773
CGI_10002774
CGI_10002776
CGI_10002777
CGI_10002779
CGI_10002780
CGI_10002781
CGI_10002782
CGI_10002783
CGI_10002786
CGI_10002787
CGI_10002788
CGI_10002790
CGI_10002791
CGI_10002792
CGI_10002793
CGI_10002794
CGI_10002795
CGI_10002796
CGI_10002798
CGI_10002799
CGI_10002800
CGI_10002802
CGI_10002803
CGI_10002804
CGI_10002805
CGI_10002806
CGI_10002807
CGI_10002808
CGI_10002809
CGI_10002811
CGI_10002812
CGI_10002813
CGI_10002814
CGI_10002815
CGI_10002816
CGI_10002817
CGI_10002818
CGI_10002819
CGI_10002821
CGI_10002822
CGI_10002823
CGI_10002824
CGI_10002825
CGI_10002826
CGI_10002827
CGI_10002828
CGI_10002829
CGI_10002830
CGI_10002831
CGI_10002832
CGI_10002833
CGI_10002834
CGI_10002835
CGI_10002836
CGI_10002837
CGI_10002838
CGI_10002839
CGI_10002840
CGI_10002841
CGI_10002842
CGI_10002843
CGI_10002844
CGI_10002845
CGI_10002848
CGI_10002849
CGI_10002850
CGI_10002852
CGI_10002855
CGI_10002857
CGI_10002858
CGI_10002859
CGI_10002860
CGI_10002861
CGI_10002862
CGI_10002863
CGI_10002864
CGI_10002865
CGI_10002866
CGI_10002867
CGI_10002868
CGI_10002870
CGI_10002873
CGI_10002874
CGI_10002877
CGI_10002878
CGI_10002879
CGI_10002880
CGI_10002881
CGI_10002882
CGI_10002887
CGI_10002890
CGI_10002891
CGI_10002892
CGI_10002893
CGI_10002895
CGI_10002896
CGI_10002898
CGI_10002899
CGI_10002900
CGI_10002901
CGI_10002902
CGI_10002904
CGI_10002905
CGI_10002906
CGI_10002907
CGI_10002909
CGI_10002910
CGI_10002911
CGI_10002913
CGI_10002914
CGI_10002916
CGI_10002917
CGI_10002918
CGI_10002919
CGI_10002920
CGI_10002921
CGI_10002922
CGI_10002923
CGI_10002924
CGI_10002926
CGI_10002927
CGI_10002928
CGI_10002929
CGI_10002937
CGI_10002938
CGI_10002939
CGI_10002943
CGI_10002946
CGI_10002947
CGI_10002948
CGI_10002949
CGI_10002951
CGI_10002952
CGI_10002955
CGI_10002957
CGI_10002959
CGI_10002961
CGI_10002962
CGI_10002963
CGI_10002964
CGI_10002965
CGI_10002970
CGI_10002971
CGI_10002972
CGI_10002973
CGI_10002979
CGI_10002980
CGI_10002981
CGI_10002982
CGI_10002983
CGI_10002985
CGI_10002986
CGI_10002988
CGI_10002989
CGI_10002990
CGI_10002992
CGI_10002993
CGI_10002994
CGI_10002995
CGI_10002996
CGI_10002997
CGI_10003000
CGI_10003001
CGI_10003002
CGI_10003003
CGI_10003004
CGI_10003005
CGI_10003007
CGI_10003008
CGI_10003014
CGI_10003016
CGI_10003019
CGI_10003021
CGI_10003022
CGI_10003024
CGI_10003025
CGI_10003026
CGI_10003028
CGI_10003031
CGI_10003032
CGI_10003033
CGI_10003039
CGI_10003042
CGI_10003043
CGI_10003044
CGI_10003045
CGI_10003047
CGI_10003048
CGI_10003049
CGI_10003050
CGI_10003051
CGI_10003053
CGI_10003054
CGI_10003055
CGI_10003056
CGI_10003057
CGI_10003058
CGI_10003059
CGI_10003060
CGI_10003061
CGI_10003063
CGI_10003064
CGI_10003066
CGI_10003067
CGI_10003068
CGI_10003069
CGI_10003070
CGI_10003071
CGI_10003072
CGI_10003073
CGI_10003074
CGI_10003075
CGI_10003076
CGI_10003077
CGI_10003079
CGI_10003080
CGI_10003081
CGI_10003082
CGI_10003083
CGI_10003085
CGI_10003086
CGI_10003088
CGI_10003092
CGI_10003093
CGI_10003094
CGI_10003095
CGI_10003097
CGI_10003098
CGI_10003099
CGI_10003100
CGI_10003101
CGI_10003103
CGI_10003104
CGI_10003105
CGI_10003107
CGI_10003110
CGI_10003111
CGI_10003112
CGI_10003113
CGI_10003114
CGI_10003115
CGI_10003117
CGI_10003118
CGI_10003120
CGI_10003121
CGI_10003122
CGI_10003124
CGI_10003125
CGI_10003126
CGI_10003129
CGI_10003130
CGI_10003131
CGI_10003132
CGI_10003133
CGI_10003134
CGI_10003135
CGI_10003137
CGI_10003138
CGI_10003139
CGI_10003140
CGI_10003141
CGI_10003142
CGI_10003143
CGI_10003144
CGI_10003145
CGI_10003147
CGI_10003148
CGI_10003149
CGI_10003151
CGI_10003153
CGI_10003154
CGI_10003156
CGI_10003157
CGI_10003158
CGI_10003160
CGI_10003161
CGI_10003162
[truncated: 19,198 more rows]
