# Supplementary material for: Comparative Gene Analysis in Chordate Embryonic Development Reveals Co-existence of Von Baer’s and Haeckel’s Postulates
Source: Research Square preprint supplement (doi:10.21203/rs.3.rs-579345/v1), 2021-06-17
Supplement: Supplementary file 14 [file 37615719a91708c274fc2389.xlsx]

## Sheet: Sheet1
Supplementary Data 9. Annotations and GO terms of overlapped genes between CM and CL9.1
Gene	Gene Symbol	Description	Biological Process (GO)
ENSMUSG00000031669	Gins3	GINS complex subunit 3 (Psf3 homolog)	GO:0006260 DNA replication;GO:0006259 DNA metabolic process;GO:0034645 cellular macromolecule biosynthetic process
ENSMUSG00000004667	Polr2e	polymerase (RNA) II (DNA directed) polypeptide E	GO:0006366 transcription by RNA polymerase II;GO:0006351 transcription, DNA-templated;GO:0097659 nucleic acid-templated transcription
ENSMUSG00000030138	Bms1	BMS1, ribosome biogenesis factor	GO:0000462 maturation of SSU-rRNA from tricistronic rRNA transcript (SSU-rRNA, 5.8S rRNA, LSU-rRNA);GO:0030490 maturation of SSU-rRNA;GO:0042274 ribosomal small subunit biogenesis
ENSMUSG00000031403	Dkc1	dyskeratosis congenita 1, dyskerin	GO:1904874 positive regulation of telomerase RNA localization to Cajal body;GO:1904851 positive regulation of establishment of protein localization to telomere;GO:0000495 box H/ACA snoRNA 3'-end processing
ENSMUSG00000025138	Sirt7	sirtuin 7	GO:0007072 positive regulation of transcription involved in exit from mitosis;GO:0070932 histone H3 deacetylation;GO:0009303 rRNA transcription
ENSMUSG00000048170	Mcmbp	minichromosome maintenance complex binding protein	GO:0007062 sister chromatid cohesion;GO:0006261 DNA-dependent DNA replication;GO:0000819 sister chromatid segregation
ENSMUSG00000025413	Ttc4	tetratricopeptide repeat domain 4	GO:0008150 biological_process
ENSMUSG00000015880	Ncapg	non-SMC condensin I complex, subunit G	GO:0007076 mitotic chromosome condensation;GO:0030261 chromosome condensation;GO:0000070 mitotic sister chromatid segregation
ENSMUSG00000027185	Nat10	N-acetyltransferase 10	GO:1904812 rRNA acetylation involved in maturation of SSU-rRNA;GO:1990882 rRNA acetylation;GO:0032211 negative regulation of telomere maintenance via telomerase
ENSMUSG00000021714	Cenpk	centromere protein K	GO:0051382 kinetochore assembly;GO:0034508 centromere complex assembly;GO:0051383 kinetochore organization
ENSMUSG00000033031	Cip2a	cell proliferation regulating inhibitor of protein phosphatase 2A	GO:2000179 positive regulation of neural precursor cell proliferation;GO:2000177 regulation of neural precursor cell proliferation;GO:0007283 spermatogenesis
ENSMUSG00000028312	Smc2	structural maintenance of chromosomes 2	GO:0010032 meiotic chromosome condensation;GO:0000012 single strand break repair;GO:0007076 mitotic chromosome condensation
ENSMUSG00000034906	Ncaph	non-SMC condensin I complex, subunit H	GO:0051309 female meiosis chromosome separation;GO:0016321 female meiosis chromosome segregation;GO:0010032 meiotic chromosome condensation
ENSMUSG00000026708	Cenpl	centromere protein L	GO:0008150 biological_process
ENSMUSG00000028271	Gtf2b	general transcription factor IIB	GO:0043923 positive regulation by host of viral transcription;GO:1904798 positive regulation of core promoter binding;GO:0043921 modulation by host of viral transcription
ENSMUSG00000029283	Cdc7	cell division cycle 7 (S. cerevisiae)	GO:0010571 positive regulation of nuclear cell cycle DNA replication;GO:0033262 regulation of nuclear cell cycle DNA replication;GO:0010971 positive regulation of G2/M transition of mitotic cell cycle
ENSMUSG00000024542	Cep192	centrosomal protein 192	GO:0007094 mitotic spindle assembly checkpoint;GO:0090222 centrosome-templated microtubule nucleation;GO:0071174 mitotic spindle checkpoint
ENSMUSG00000022064	Pibf1	progesterone immunomodulatory binding factor 1	GO:0031393 negative regulation of prostaglandin biosynthetic process;GO:0031392 regulation of prostaglandin biosynthetic process;GO:0001516 prostaglandin biosynthetic process
ENSMUSG00000025001	Hells	helicase, lymphoid specific	GO:0031508 pericentric heterochromatin assembly;GO:0006346 methylation-dependent chromatin silencing;GO:0031507 heterochromatin assembly
ENSMUSG00000025487	Psmd13	proteasome (prosome, macropain) 26S subunit, non-ATPase, 13	GO:0043248 proteasome assembly;GO:0007127 meiosis I;GO:0061982 meiosis I cell cycle process
ENSMUSG00000030177	Ccdc77	coiled-coil domain containing 77	GO:0008150 biological_process
ENSMUSG00000066979	Bub3	BUB3 mitotic checkpoint protein	GO:0007094 mitotic spindle assembly checkpoint;GO:0071174 mitotic spindle checkpoint;GO:0045841 negative regulation of mitotic metaphase/anaphase transition
ENSMUSG00000023988	Bysl	bystin-like	GO:0001829 trophectodermal cell differentiation;GO:0001825 blastocyst formation;GO:0000462 maturation of SSU-rRNA from tricistronic rRNA transcript (SSU-rRNA, 5.8S rRNA, LSU-rRNA)
ENSMUSG00000068856	Sf3b4	splicing factor 3b, subunit 4	GO:0048026 positive regulation of mRNA splicing, via spliceosome;GO:0050685 positive regulation of mRNA processing;GO:0033120 positive regulation of RNA splicing
ENSMUSG00000066148	Prpf4	pre-mRNA processing factor 4	GO:0000398 mRNA splicing, via spliceosome;GO:0000377 RNA splicing, via transesterification reactions with bulged adenosine as nucleophile;GO:0000375 RNA splicing, via transesterification reactions
ENSMUSG00000051329	Nup160	nucleoporin 160	GO:0006406 mRNA export from nucleus;GO:0071427 mRNA-containing ribonucleoprotein complex export from nucleus;GO:0071426 ribonucleoprotein complex export from nucleus
ENSMUSG00000031864	Ints10	integrator complex subunit 10	GO:0016180 snRNA processing;GO:0016073 snRNA metabolic process;GO:0034470 ncRNA processing
ENSMUSG00000031862	Atp13a1	ATPase type 13A1	GO:0006874 cellular calcium ion homeostasis;GO:0055074 calcium ion homeostasis;GO:0072503 cellular divalent inorganic cation homeostasis
ENSMUSG00000039748	Exo1	exonuclease 1	GO:0045190 isotype switching;GO:0002204 somatic recombination of immunoglobulin genes involved in immune response;GO:0002208 somatic diversification of immunoglobulins involved in immune response
ENSMUSG00000056832	Ttc26	tetratricopeptide repeat domain 26	GO:1905198 manchette assembly;GO:0035720 intraciliary anterograde transport;GO:0008594 photoreceptor cell morphogenesis
ENSMUSG00000039187	Fanci	Fanconi anemia, complementation group I	GO:0031398 positive regulation of protein ubiquitination;GO:1903322 positive regulation of protein modification by small protein conjugation or removal;GO:0031396 regulation of protein ubiquitination
ENSMUSG00000027968	Larp7	La ribonucleoprotein domain family, member 7	GO:0035562 negative regulation of chromatin binding;GO:1900087 positive regulation of G1/S transition of mitotic cell cycle;GO:0036093 germ cell proliferation
ENSMUSG00000005899	Smpd4	sphingomyelin phosphodiesterase 4	GO:0006685 sphingomyelin catabolic process;GO:0006684 sphingomyelin metabolic process;GO:0046475 glycerophospholipid catabolic process
ENSMUSG00000028430	Nol6	nucleolar protein family 6 (RNA-associated)	GO:0006409 tRNA export from nucleus;GO:0071431 tRNA-containing ribonucleoprotein complex export from nucleus;GO:0097064 ncRNA export from nucleus
ENSMUSG00000015748	Prpf3	pre-mRNA processing factor 3	GO:0000244 spliceosomal tri-snRNP complex assembly;GO:0000387 spliceosomal snRNP assembly;GO:0000398 mRNA splicing, via spliceosome
ENSMUSG00000026134	Prim2	DNA primase, p58 subunit	GO:0006269 DNA replication, synthesis of RNA primer;GO:0006261 DNA-dependent DNA replication;GO:0006260 DNA replication
ENSMUSG00000001150	Mcm3ap	minichromosome maintenance complex component 3 associated protein	GO:0016973 poly(A)+ mRNA export from nucleus;GO:0016446 somatic hypermutation of immunoglobulin genes;GO:0006406 mRNA export from nucleus
ENSMUSG00000006398	Cdc20	cell division cycle 20	GO:0000089 mitotic metaphase;GO:0051323 metaphase;GO:0000087 mitotic M phase
ENSMUSG00000047879	Usp14	ubiquitin specific peptidase 14	GO:1903070 negative regulation of ER-associated ubiquitin-dependent protein catabolic process;GO:1903069 regulation of ER-associated ubiquitin-dependent protein catabolic process;GO:1904293 negative regulation of ERAD pathway
ENSMUSG00000027469	Tpx2	TPX2, microtubule-associated	GO:0060236 regulation of mitotic spindle organization;GO:0090307 mitotic spindle assembly;GO:0090224 regulation of spindle organization
ENSMUSG00000025173	Wdr45b	WD repeat domain 45B	GO:0034497 protein localization to phagophore assembly site;GO:0000422 autophagy of mitochondrion;GO:0000045 autophagosome assembly
ENSMUSG00000028010	Gar1	GAR1 ribonucleoprotein	GO:0000454 snoRNA guided rRNA pseudouridine synthesis;GO:0031118 rRNA pseudouridine synthesis;GO:0001522 pseudouridine synthesis
ENSMUSG00000029922	Mkrn1	makorin, ring finger protein, 1	GO:1990830 cellular response to leukemia inhibitory factor;GO:0000209 protein polyubiquitination;GO:1990823 response to leukemia inhibitory factor
ENSMUSG00000030619	Eed	embryonic ectoderm development	GO:0061087 positive regulation of histone H3-K27 methylation;GO:2000011 regulation of adaxial/abaxial pattern formation;GO:0061085 regulation of histone H3-K27 methylation
ENSMUSG00000040383	Aqr	aquarius	GO:0000398 mRNA splicing, via spliceosome;GO:0000377 RNA splicing, via transesterification reactions with bulged adenosine as nucleophile;GO:0000375 RNA splicing, via transesterification reactions
ENSMUSG00000032370	Lactb	lactamase, beta	GO:0019216 regulation of lipid metabolic process;GO:0006629 lipid metabolic process;GO:0006508 proteolysis
ENSMUSG00000029577	Ube3b	ubiquitin protein ligase E3B	GO:0000209 protein polyubiquitination;GO:0006511 ubiquitin-dependent protein catabolic process;GO:0019941 modification-dependent protein catabolic process
ENSMUSG00000028322	Exosc3	exosome component 3	GO:0045830 positive regulation of isotype switching;GO:0071049 nuclear retention of pre-mRNA with aberrant 3'-ends at the site of transcription;GO:0045191 regulation of isotype switching
ENSMUSG00000015757	Ppil4	peptidylprolyl isomerase (cyclophilin)-like 4	GO:1901407 regulation of phosphorylation of RNA polymerase II C-terminal domain;GO:0070816 phosphorylation of RNA polymerase II C-terminal domain;GO:0000413 protein peptidyl-prolyl isomerization
ENSMUSG00000040034	Nup43	nucleoporin 43	GO:0051028 mRNA transport;GO:0050658 RNA transport;GO:0050657 nucleic acid transport
ENSMUSG00000060121	Gemin2	gem nuclear organelle associated protein 2	GO:0000387 spliceosomal snRNP assembly;GO:0000245 spliceosomal complex assembly;GO:0000398 mRNA splicing, via spliceosome
ENSMUSG00000031262	Cenpi	centromere protein I	GO:0034508 centromere complex assembly;GO:0065004 protein-DNA complex assembly;GO:0071824 protein-DNA complex subunit organization
ENSMUSG00000019984	Med23	mediator complex subunit 23	GO:2000409 positive regulation of T cell extravasation;GO:2000407 regulation of T cell extravasation;GO:0072683 T cell extravasation
ENSMUSG00000032512	Wdr48	WD repeat domain 48	GO:1903003 positive regulation of protein deubiquitination;GO:1902525 regulation of protein monoubiquitination;GO:0072520 seminiferous tubule development
ENSMUSG00000030101	Sumf1	sulfatase modifying factor 1	GO:0018158 protein oxidation;GO:0043687 post-translational protein modification;GO:0055114 oxidation-reduction process
ENSMUSG00000019715	Gle1	GLE1 RNA export mediator (yeast)	GO:0016973 poly(A)+ mRNA export from nucleus;GO:0006449 regulation of translational termination;GO:0006406 mRNA export from nucleus
ENSMUSG00000020166	Cnot2	CCR4-NOT transcription complex, subunit 2	GO:0033147 negative regulation of intracellular estrogen receptor signaling pathway;GO:0010606 positive regulation of cytoplasmic mRNA processing body assembly;GO:0001829 trophectodermal cell differentiation
ENSMUSG00000022779	Top3b	topoisomerase (DNA) III beta	GO:0006265 DNA topological change;GO:0071103 DNA conformation change;GO:0007059 chromosome segregation
ENSMUSG00000028252	Ccnc	cyclin C	GO:0090209 negative regulation of triglyceride metabolic process;GO:0090207 regulation of triglyceride metabolic process;GO:0006641 triglyceride metabolic process
ENSMUSG00000026095	Asnsd1	asparagine synthetase domain containing 1
ENSMUSG00000029521	Chek2	checkpoint kinase 2	GO:0072428 signal transduction involved in intra-S DNA damage checkpoint;GO:0000085 mitotic G2 phase;GO:1903464 negative regulation of mitotic cell cycle DNA replication
ENSMUSG00000029507	Pus1	pseudouridine synthase 1	GO:0031119 tRNA pseudouridine synthesis;GO:1990481 mRNA pseudouridine synthesis;GO:0001522 pseudouridine synthesis
ENSMUSG00000038957	Edc3	enhancer of mRNA decapping 3	GO:0031087 deadenylation-independent decapping of nuclear-transcribed mRNA;GO:0031086 nuclear-transcribed mRNA catabolic process, deadenylation-independent decay;GO:0033962 cytoplasmic mRNA processing body assembly
ENSMUSG00000021179	Nrde2	nrde-2 necessary for RNA interference, domain containing	GO:0031048 chromatin silencing by small RNA;GO:0016246 RNA interference;GO:0006342 chromatin silencing
ENSMUSG00000042185	Nfrkb	nuclear factor related to kappa B binding protein	GO:0006310 DNA recombination;GO:0006281 DNA repair;GO:0006974 cellular response to DNA damage stimulus
ENSMUSG00000025200	Cwf19l1	CWF19-like 1, cell cycle control (S. pombe)	GO:0000398 mRNA splicing, via spliceosome;GO:0000377 RNA splicing, via transesterification reactions with bulged adenosine as nucleophile;GO:0000375 RNA splicing, via transesterification reactions
ENSMUSG00000029782	Tmem209	transmembrane protein 209	GO:0008150 biological_process
ENSMUSG00000026563	Tada1	transcriptional adaptor 1	GO:0043966 histone H3 acetylation;GO:0016573 histone acetylation;GO:0018393 internal peptidyl-lysine acetylation
ENSMUSG00000027569	Mrgbp	MRG/MORF4L binding protein	GO:0016573 histone acetylation;GO:0018393 internal peptidyl-lysine acetylation;GO:0006475 internal protein amino acid acetylation
ENSMUSG00000037361	Sf3b6	splicing factor 3B, subunit 6	GO:0001825 blastocyst formation;GO:0001824 blastocyst development;GO:0000398 mRNA splicing, via spliceosome
ENSMUSG00000060098	Prmt7	protein arginine N-methyltransferase 7	GO:0019919 peptidyl-arginine methylation, to asymmetrical-dimethyl arginine;GO:0035247 peptidyl-arginine omega-N-methylation;GO:0043046 DNA methylation involved in gamete generation
ENSMUSG00000023932	Cdc5l	cell division cycle 5-like (S. pombe)	GO:1904568 cellular response to wortmannin;GO:1904567 response to wortmannin;GO:0072422 signal transduction involved in DNA damage checkpoint
ENSMUSG00000038252	Ncapd2	non-SMC condensin I complex, subunit D2	GO:0010032 meiotic chromosome condensation;GO:0007076 mitotic chromosome condensation;GO:0030261 chromosome condensation
ENSMUSG00000025917	Cops5	COP9 signalosome subunit 5	GO:1903894 regulation of IRE1-mediated unfolded protein response;GO:1900101 regulation of endoplasmic reticulum unfolded protein response;GO:1990182 exosomal secretion
ENSMUSG00000035842	Ddx11	DEAD/H (Asp-Glu-Ala-Asp/His) box helicase 11	GO:0032079 positive regulation of endodeoxyribonuclease activity;GO:1904976 cellular response to bleomycin;GO:1901838 positive regulation of transcription of nucleolar large rRNA by RNA polymerase I
ENSMUSG00000041763	Tpp2	tripeptidyl peptidase II	GO:0006508 proteolysis;GO:0019538 protein metabolic process;GO:1901564 organonitrogen compound metabolic process
ENSMUSG00000021244	Ylpm1	YLP motif containing 1	GO:0032204 regulation of telomere maintenance;GO:0000723 telomere maintenance;GO:0032200 telomere organization
ENSMUSG00000019792	Trmt11	tRNA methyltransferase 11	GO:0008033 tRNA processing;GO:0006399 tRNA metabolic process;GO:0034470 ncRNA processing
ENSMUSG00000029014	Dnajc2	DnaJ heat shock protein family (Hsp40) member C2	GO:2000279 negative regulation of DNA biosynthetic process;GO:2000278 regulation of DNA biosynthetic process;GO:0030308 negative regulation of cell growth
ENSMUSG00000029034	Ints11	integrator complex subunit 11	GO:0016180 snRNA processing;GO:0016073 snRNA metabolic process;GO:0034470 ncRNA processing
ENSMUSG00000026669	Mcm10	minichromosome maintenance 10 replication initiation factor	GO:0006270 DNA replication initiation;GO:0006261 DNA-dependent DNA replication;GO:0006260 DNA replication
ENSMUSG00000070697	Utp3	UTP3 small subunit processome component	GO:0000462 maturation of SSU-rRNA from tricistronic rRNA transcript (SSU-rRNA, 5.8S rRNA, LSU-rRNA);GO:0030490 maturation of SSU-rRNA;GO:0042274 ribosomal small subunit biogenesis
ENSMUSG00000021067	Sav1	salvador family WW domain containing 1	GO:0060044 negative regulation of cardiac muscle cell proliferation;GO:0055022 negative regulation of cardiac muscle tissue growth;GO:0060043 regulation of cardiac muscle cell proliferation
ENSMUSG00000022142	Nup155	nucleoporin 155	GO:0086014 atrial cardiac muscle cell action potential;GO:0086026 atrial cardiac muscle cell to AV node cell signaling;GO:0086066 atrial cardiac muscle cell to AV node cell communication
