# Supplementary material for: Comparative Gene Analysis in Chordate Embryonic Development Reveals Co-existence of Von Baer’s and Haeckel’s Postulates
Source: Research Square preprint supplement (doi:10.21203/rs.3.rs-579345/v1), 2021-06-17
Supplement: Supplementary file 15 [file 70715c232a294f3fc1264995.xlsx]

## Sheet: Pelodiscus sinensis
Supplementary Data 6.The list of progressive model genes for each species
ENSPSIG00000000056
ENSPSIG00000000180
ENSPSIG00000000346
ENSPSIG00000000396
ENSPSIG00000000471
ENSPSIG00000000502
ENSPSIG00000000587
ENSPSIG00000000701
ENSPSIG00000000733
ENSPSIG00000000790
ENSPSIG00000001005
ENSPSIG00000001012
ENSPSIG00000001111
ENSPSIG00000001278
ENSPSIG00000001745
ENSPSIG00000001890
ENSPSIG00000002098
ENSPSIG00000002118
ENSPSIG00000002159
ENSPSIG00000002206
ENSPSIG00000002208
ENSPSIG00000002220
ENSPSIG00000002336
ENSPSIG00000002363
ENSPSIG00000002385
ENSPSIG00000002395
ENSPSIG00000002427
ENSPSIG00000002438
ENSPSIG00000002582
ENSPSIG00000002667
ENSPSIG00000002695
ENSPSIG00000002713
ENSPSIG00000002722
ENSPSIG00000002870
ENSPSIG00000002882
ENSPSIG00000002950
ENSPSIG00000002959
ENSPSIG00000002973
ENSPSIG00000002978
ENSPSIG00000003015
ENSPSIG00000003023
ENSPSIG00000003038
ENSPSIG00000003139
ENSPSIG00000003245
ENSPSIG00000003262
ENSPSIG00000003320
ENSPSIG00000003426
ENSPSIG00000003431
ENSPSIG00000003436
ENSPSIG00000003470
ENSPSIG00000003475
ENSPSIG00000003506
ENSPSIG00000003585
ENSPSIG00000003609
ENSPSIG00000003615
ENSPSIG00000003616
ENSPSIG00000003654
ENSPSIG00000003699
ENSPSIG00000003700
ENSPSIG00000003723
ENSPSIG00000003750
ENSPSIG00000003772
ENSPSIG00000003775
ENSPSIG00000003914
ENSPSIG00000003977
ENSPSIG00000003993
ENSPSIG00000004054
ENSPSIG00000004091
ENSPSIG00000004103
ENSPSIG00000004117
ENSPSIG00000004145
ENSPSIG00000004150
ENSPSIG00000004213
ENSPSIG00000004217
ENSPSIG00000004233
ENSPSIG00000004242
ENSPSIG00000004259
ENSPSIG00000004386
ENSPSIG00000004472
ENSPSIG00000004477
ENSPSIG00000004547
ENSPSIG00000004600
ENSPSIG00000004651
ENSPSIG00000004676
ENSPSIG00000004714
ENSPSIG00000004719
ENSPSIG00000004770
ENSPSIG00000004783
ENSPSIG00000004786
ENSPSIG00000004788
ENSPSIG00000004815
ENSPSIG00000004824
ENSPSIG00000004830
ENSPSIG00000004839
ENSPSIG00000004862
ENSPSIG00000004928
ENSPSIG00000004942
ENSPSIG00000004943
ENSPSIG00000005107
ENSPSIG00000005108
ENSPSIG00000005173
ENSPSIG00000005185
ENSPSIG00000005251
ENSPSIG00000005302
ENSPSIG00000005326
ENSPSIG00000005351
ENSPSIG00000005398
ENSPSIG00000005460
ENSPSIG00000005479
ENSPSIG00000005492
ENSPSIG00000005493
ENSPSIG00000005537
ENSPSIG00000005563
ENSPSIG00000005594
ENSPSIG00000005598
ENSPSIG00000005675
ENSPSIG00000005677
ENSPSIG00000005680
ENSPSIG00000005738
ENSPSIG00000005772
ENSPSIG00000005776
ENSPSIG00000005805
ENSPSIG00000005841
ENSPSIG00000005908
ENSPSIG00000005990
ENSPSIG00000006021
ENSPSIG00000006069
ENSPSIG00000006091
ENSPSIG00000006113
ENSPSIG00000006124
ENSPSIG00000006274
ENSPSIG00000006319
ENSPSIG00000006351
ENSPSIG00000006356
ENSPSIG00000006421
ENSPSIG00000006536
ENSPSIG00000006558
ENSPSIG00000006623
ENSPSIG00000006646
ENSPSIG00000006732
ENSPSIG00000006747
ENSPSIG00000006805
ENSPSIG00000006807
ENSPSIG00000006839
ENSPSIG00000006861
ENSPSIG00000006892
ENSPSIG00000006896
ENSPSIG00000006928
ENSPSIG00000006962
ENSPSIG00000007004
ENSPSIG00000007029
ENSPSIG00000007034
ENSPSIG00000007049
ENSPSIG00000007071
ENSPSIG00000007157
ENSPSIG00000007243
ENSPSIG00000007246
ENSPSIG00000007256
ENSPSIG00000007271
ENSPSIG00000007275
ENSPSIG00000007323
ENSPSIG00000007375
ENSPSIG00000007413
ENSPSIG00000007439
ENSPSIG00000007452
ENSPSIG00000007525
ENSPSIG00000007561
ENSPSIG00000007669
ENSPSIG00000007689
ENSPSIG00000007696
ENSPSIG00000007786
ENSPSIG00000007793
ENSPSIG00000007833
ENSPSIG00000007838
ENSPSIG00000007865
ENSPSIG00000007969
ENSPSIG00000008075
ENSPSIG00000008086
ENSPSIG00000008098
ENSPSIG00000008129
ENSPSIG00000008152
ENSPSIG00000008164
ENSPSIG00000008177
ENSPSIG00000008192
ENSPSIG00000008198
ENSPSIG00000008297
ENSPSIG00000008337
ENSPSIG00000008358
ENSPSIG00000008377
ENSPSIG00000008505
ENSPSIG00000008522
ENSPSIG00000008524
ENSPSIG00000008542
ENSPSIG00000008619
ENSPSIG00000008625
ENSPSIG00000008630
ENSPSIG00000008635
ENSPSIG00000008639
ENSPSIG00000008653
ENSPSIG00000008718
ENSPSIG00000008729
ENSPSIG00000008784
ENSPSIG00000008796
ENSPSIG00000008813
ENSPSIG00000008832
ENSPSIG00000008858
ENSPSIG00000008978
ENSPSIG00000009052
ENSPSIG00000009076
ENSPSIG00000009078
ENSPSIG00000009096
ENSPSIG00000009126
ENSPSIG00000009192
ENSPSIG00000009203
ENSPSIG00000009213
ENSPSIG00000009275
ENSPSIG00000009279
ENSPSIG00000009341
ENSPSIG00000009407
ENSPSIG00000009440
ENSPSIG00000009462
ENSPSIG00000009560
ENSPSIG00000009574
ENSPSIG00000009575
ENSPSIG00000009591
ENSPSIG00000009630
ENSPSIG00000009636
ENSPSIG00000009673
ENSPSIG00000009675
ENSPSIG00000009690
ENSPSIG00000009765
ENSPSIG00000009794
ENSPSIG00000009857
ENSPSIG00000009883
ENSPSIG00000009921
ENSPSIG00000009930
ENSPSIG00000009951
ENSPSIG00000009988
ENSPSIG00000010047
ENSPSIG00000010069
ENSPSIG00000010124
ENSPSIG00000010131
ENSPSIG00000010139
ENSPSIG00000010142
ENSPSIG00000010249
ENSPSIG00000010364
ENSPSIG00000010491
ENSPSIG00000010519
ENSPSIG00000010554
ENSPSIG00000010633
ENSPSIG00000010647
ENSPSIG00000010681
ENSPSIG00000010826
ENSPSIG00000010887
ENSPSIG00000010917
ENSPSIG00000011009
ENSPSIG00000011020
ENSPSIG00000011042
ENSPSIG00000011058
ENSPSIG00000011094
ENSPSIG00000011166
ENSPSIG00000011208
ENSPSIG00000011274
ENSPSIG00000011294
ENSPSIG00000011309
ENSPSIG00000011319
ENSPSIG00000011422
ENSPSIG00000011440
ENSPSIG00000011489
ENSPSIG00000011540
ENSPSIG00000011576
ENSPSIG00000011596
ENSPSIG00000011607
ENSPSIG00000011640
ENSPSIG00000011660
ENSPSIG00000011750
ENSPSIG00000011765
ENSPSIG00000011769
ENSPSIG00000011822
ENSPSIG00000011826
ENSPSIG00000011846
ENSPSIG00000011927
ENSPSIG00000011972
ENSPSIG00000011996
ENSPSIG00000012000
ENSPSIG00000012258
ENSPSIG00000012311
ENSPSIG00000012357
ENSPSIG00000012363
ENSPSIG00000012406
ENSPSIG00000012415
ENSPSIG00000012490
ENSPSIG00000012524
ENSPSIG00000012590
ENSPSIG00000012608
ENSPSIG00000012641
ENSPSIG00000012666
ENSPSIG00000012674
ENSPSIG00000012706
ENSPSIG00000012710
ENSPSIG00000012748
ENSPSIG00000012749
ENSPSIG00000012824
ENSPSIG00000012835
ENSPSIG00000012853
ENSPSIG00000012944
ENSPSIG00000012969
ENSPSIG00000012973
ENSPSIG00000013075
ENSPSIG00000013118
ENSPSIG00000013191
ENSPSIG00000013236
ENSPSIG00000013292
ENSPSIG00000013306
ENSPSIG00000013344
ENSPSIG00000013359
ENSPSIG00000013366
ENSPSIG00000013398
ENSPSIG00000013473
ENSPSIG00000013497
ENSPSIG00000013502
ENSPSIG00000013505
ENSPSIG00000013520
ENSPSIG00000013535
ENSPSIG00000013545
ENSPSIG00000013701
ENSPSIG00000013711
ENSPSIG00000013831
ENSPSIG00000013868
ENSPSIG00000013938
ENSPSIG00000013946
ENSPSIG00000013947
ENSPSIG00000014027
ENSPSIG00000014048
ENSPSIG00000014110
ENSPSIG00000014134
ENSPSIG00000014172
ENSPSIG00000014194
ENSPSIG00000014197
ENSPSIG00000014258
ENSPSIG00000014265
ENSPSIG00000014323
ENSPSIG00000014327
ENSPSIG00000014446
ENSPSIG00000014537
ENSPSIG00000014638
ENSPSIG00000014642
ENSPSIG00000014707
ENSPSIG00000014713
ENSPSIG00000014779
ENSPSIG00000014831
ENSPSIG00000014841
ENSPSIG00000014856
ENSPSIG00000014874
ENSPSIG00000014887
ENSPSIG00000014913
ENSPSIG00000014930
ENSPSIG00000014991
ENSPSIG00000014998
ENSPSIG00000015015
ENSPSIG00000015035
ENSPSIG00000015053
ENSPSIG00000015081
ENSPSIG00000015108
ENSPSIG00000015146
ENSPSIG00000015147
ENSPSIG00000015148
ENSPSIG00000015191
ENSPSIG00000015207
ENSPSIG00000015239
ENSPSIG00000015267
ENSPSIG00000015285
ENSPSIG00000015311
ENSPSIG00000015394
ENSPSIG00000015453
ENSPSIG00000015492
ENSPSIG00000015500
ENSPSIG00000015748
ENSPSIG00000015779
ENSPSIG00000015951
ENSPSIG00000015980
ENSPSIG00000015982
ENSPSIG00000016039
ENSPSIG00000016067
ENSPSIG00000016111
ENSPSIG00000016132
ENSPSIG00000016134
ENSPSIG00000016149
ENSPSIG00000016182
ENSPSIG00000016197
ENSPSIG00000016271
ENSPSIG00000016316
ENSPSIG00000016395
ENSPSIG00000016425
ENSPSIG00000016477
ENSPSIG00000016511
ENSPSIG00000016591
ENSPSIG00000016596
ENSPSIG00000016654
ENSPSIG00000016732
ENSPSIG00000016764
ENSPSIG00000016791
ENSPSIG00000016821
ENSPSIG00000016886
ENSPSIG00000016962
ENSPSIG00000016985
ENSPSIG00000017094
ENSPSIG00000017106
ENSPSIG00000017132
ENSPSIG00000017190
ENSPSIG00000017198
ENSPSIG00000017410
ENSPSIG00000017464
ENSPSIG00000017499
ENSPSIG00000017511
ENSPSIG00000017602
ENSPSIG00000017605
ENSPSIG00000017661
ENSPSIG00000017687
ENSPSIG00000017707
ENSPSIG00000017748
ENSPSIG00000017759
ENSPSIG00000017762
ENSPSIG00000017855
ENSPSIG00000017857
ENSPSIG00000017889
ENSPSIG00000017979
ENSPSIG00000017988
ENSPSIG00000018061
ENSPSIG00000018075
ENSPSIG00000018152
ENSPSIG00000018231
ENSPSIG00000018260

## Sheet: Gallus gallus
ENSGALG00000000098
ENSGALG00000000102
ENSGALG00000000142
ENSGALG00000000172
ENSGALG00000000195
ENSGALG00000000227
ENSGALG00000000242
ENSGALG00000000244
ENSGALG00000000264
ENSGALG00000000270
ENSGALG00000000272
ENSGALG00000000314
ENSGALG00000000317
ENSGALG00000000353
ENSGALG00000000360
ENSGALG00000000367
ENSGALG00000000377
ENSGALG00000000410
ENSGALG00000000437
ENSGALG00000000484
ENSGALG00000000490
ENSGALG00000000529
ENSGALG00000000548
ENSGALG00000000551
ENSGALG00000000562
ENSGALG00000000599
ENSGALG00000000627
ENSGALG00000000650
ENSGALG00000000672
ENSGALG00000000685
ENSGALG00000000713
ENSGALG00000000747
ENSGALG00000000769
ENSGALG00000000781
ENSGALG00000000814
ENSGALG00000000818
ENSGALG00000000840
ENSGALG00000000855
ENSGALG00000000874
ENSGALG00000000883
ENSGALG00000000895
ENSGALG00000000899
ENSGALG00000000902
ENSGALG00000000936
ENSGALG00000000950
ENSGALG00000000981
ENSGALG00000000993
ENSGALG00000000998
ENSGALG00000001026
ENSGALG00000001036
ENSGALG00000001051
ENSGALG00000001124
ENSGALG00000001141
ENSGALG00000001171
ENSGALG00000001183
ENSGALG00000001197
ENSGALG00000001208
ENSGALG00000001223
ENSGALG00000001233
ENSGALG00000001281
ENSGALG00000001291
ENSGALG00000001293
ENSGALG00000001347
ENSGALG00000001363
ENSGALG00000001374
ENSGALG00000001396
ENSGALG00000001434
ENSGALG00000001438
ENSGALG00000001443
ENSGALG00000001446
ENSGALG00000001452
ENSGALG00000001475
ENSGALG00000001480
ENSGALG00000001493
ENSGALG00000001501
ENSGALG00000001512
ENSGALG00000001532
ENSGALG00000001544
ENSGALG00000001545
ENSGALG00000001565
ENSGALG00000001610
ENSGALG00000001653
ENSGALG00000001654
ENSGALG00000001662
ENSGALG00000001672
ENSGALG00000001677
ENSGALG00000001697
ENSGALG00000001706
ENSGALG00000001735
ENSGALG00000001740
ENSGALG00000001770
ENSGALG00000001772
ENSGALG00000001774
ENSGALG00000001780
ENSGALG00000001782
ENSGALG00000001802
ENSGALG00000001807
ENSGALG00000001812
ENSGALG00000001828
ENSGALG00000001832
ENSGALG00000001849
ENSGALG00000001850
ENSGALG00000001859
ENSGALG00000001879
ENSGALG00000001896
ENSGALG00000001900
ENSGALG00000001916
ENSGALG00000001932
ENSGALG00000001933
ENSGALG00000001946
ENSGALG00000001968
ENSGALG00000001969
ENSGALG00000001977
ENSGALG00000001981
ENSGALG00000002008
ENSGALG00000002014
ENSGALG00000002016
ENSGALG00000002024
ENSGALG00000002082
ENSGALG00000002098
ENSGALG00000002123
ENSGALG00000002129
ENSGALG00000002159
ENSGALG00000002172
ENSGALG00000002223
ENSGALG00000002225
ENSGALG00000002262
ENSGALG00000002298
ENSGALG00000002327
ENSGALG00000002374
ENSGALG00000002375
ENSGALG00000002386
ENSGALG00000002389
ENSGALG00000002398
ENSGALG00000002430
ENSGALG00000002433
ENSGALG00000002443
ENSGALG00000002448
ENSGALG00000002460
ENSGALG00000002478
ENSGALG00000002479
ENSGALG00000002484
ENSGALG00000002487
ENSGALG00000002490
ENSGALG00000002504
ENSGALG00000002507
ENSGALG00000002514
ENSGALG00000002515
ENSGALG00000002543
ENSGALG00000002546
ENSGALG00000002594
ENSGALG00000002612
ENSGALG00000002632
ENSGALG00000002675
ENSGALG00000002683
ENSGALG00000002707
ENSGALG00000002708
ENSGALG00000002709
ENSGALG00000002719
ENSGALG00000002723
ENSGALG00000002750
ENSGALG00000002789
ENSGALG00000002832
ENSGALG00000002926
ENSGALG00000002963
ENSGALG00000002986
ENSGALG00000003067
ENSGALG00000003074
ENSGALG00000003130
ENSGALG00000003150
ENSGALG00000003164
ENSGALG00000003177
ENSGALG00000003180
ENSGALG00000003183
ENSGALG00000003193
ENSGALG00000003205
ENSGALG00000003226
ENSGALG00000003248
ENSGALG00000003261
ENSGALG00000003264
ENSGALG00000003283
ENSGALG00000003288
ENSGALG00000003375
ENSGALG00000003377
ENSGALG00000003429
ENSGALG00000003434
ENSGALG00000003447
ENSGALG00000003449
ENSGALG00000003473
ENSGALG00000003488
ENSGALG00000003496
ENSGALG00000003512
ENSGALG00000003541
ENSGALG00000003553
ENSGALG00000003580
ENSGALG00000003589
ENSGALG00000003594
ENSGALG00000003605
ENSGALG00000003614
ENSGALG00000003631
ENSGALG00000003644
ENSGALG00000003655
ENSGALG00000003689
ENSGALG00000003692
ENSGALG00000003699
ENSGALG00000003737
ENSGALG00000003763
ENSGALG00000003777
ENSGALG00000003782
ENSGALG00000003792
ENSGALG00000003818
ENSGALG00000003833
ENSGALG00000003849
ENSGALG00000003854
ENSGALG00000003875
ENSGALG00000003882
ENSGALG00000003886
ENSGALG00000003891
ENSGALG00000003895
ENSGALG00000003900
ENSGALG00000003913
ENSGALG00000003923
ENSGALG00000003930
ENSGALG00000003957
ENSGALG00000003965
ENSGALG00000004057
ENSGALG00000004065
ENSGALG00000004083
ENSGALG00000004093
ENSGALG00000004184
ENSGALG00000004203
ENSGALG00000004223
ENSGALG00000004230
ENSGALG00000004236
ENSGALG00000004239
ENSGALG00000004255
ENSGALG00000004269
ENSGALG00000004274
ENSGALG00000004284
ENSGALG00000004293
ENSGALG00000004304
ENSGALG00000004310
ENSGALG00000004321
ENSGALG00000004326
ENSGALG00000004333
ENSGALG00000004370
ENSGALG00000004372
ENSGALG00000004386
ENSGALG00000004412
ENSGALG00000004414
ENSGALG00000004418
ENSGALG00000004438
ENSGALG00000004466
ENSGALG00000004481
ENSGALG00000004510
ENSGALG00000004512
ENSGALG00000004528
ENSGALG00000004532
ENSGALG00000004538
ENSGALG00000004571
ENSGALG00000004581
ENSGALG00000004626
ENSGALG00000004628
ENSGALG00000004662
ENSGALG00000004690
ENSGALG00000004714
ENSGALG00000004715
ENSGALG00000004716
ENSGALG00000004722
ENSGALG00000004727
ENSGALG00000004740
ENSGALG00000004741
ENSGALG00000004776
ENSGALG00000004779
ENSGALG00000004780
ENSGALG00000004794
ENSGALG00000004800
ENSGALG00000004804
ENSGALG00000004833
ENSGALG00000004850
ENSGALG00000004852
ENSGALG00000004857
ENSGALG00000004867
ENSGALG00000004869
ENSGALG00000004873
ENSGALG00000004879
ENSGALG00000004881
ENSGALG00000004888
ENSGALG00000004893
ENSGALG00000004907
ENSGALG00000004921
ENSGALG00000004966
ENSGALG00000004974
ENSGALG00000004980
ENSGALG00000004994
ENSGALG00000005016
ENSGALG00000005019
ENSGALG00000005027
ENSGALG00000005031
ENSGALG00000005074
ENSGALG00000005079
ENSGALG00000005120
ENSGALG00000005135
ENSGALG00000005140
ENSGALG00000005161
ENSGALG00000005176
ENSGALG00000005180
ENSGALG00000005188
ENSGALG00000005215
ENSGALG00000005223
ENSGALG00000005226
ENSGALG00000005241
ENSGALG00000005246
ENSGALG00000005252
ENSGALG00000005256
ENSGALG00000005263
ENSGALG00000005272
ENSGALG00000005278
ENSGALG00000005290
ENSGALG00000005292
ENSGALG00000005310
ENSGALG00000005314
ENSGALG00000005315
ENSGALG00000005319
ENSGALG00000005332
ENSGALG00000005346
ENSGALG00000005347
ENSGALG00000005349
ENSGALG00000005363
ENSGALG00000005367
ENSGALG00000005398
ENSGALG00000005417
ENSGALG00000005419
ENSGALG00000005422
ENSGALG00000005441
ENSGALG00000005512
ENSGALG00000005530
ENSGALG00000005531
ENSGALG00000005538
ENSGALG00000005552
ENSGALG00000005554
ENSGALG00000005577
ENSGALG00000005589
ENSGALG00000005603
ENSGALG00000005610
ENSGALG00000005628
ENSGALG00000005632
ENSGALG00000005673
ENSGALG00000005676
ENSGALG00000005701
ENSGALG00000005725
ENSGALG00000005730
ENSGALG00000005733
ENSGALG00000005737
ENSGALG00000005821
ENSGALG00000005822
ENSGALG00000005850
ENSGALG00000005856
ENSGALG00000005886
ENSGALG00000005898
ENSGALG00000005911
ENSGALG00000005932
ENSGALG00000005936
ENSGALG00000005959
ENSGALG00000005974
ENSGALG00000005977
ENSGALG00000005979
ENSGALG00000005986
ENSGALG00000005995
ENSGALG00000005996
ENSGALG00000006007
ENSGALG00000006009
ENSGALG00000006013
ENSGALG00000006027
ENSGALG00000006036
ENSGALG00000006039
ENSGALG00000006074
ENSGALG00000006104
ENSGALG00000006126
ENSGALG00000006147
ENSGALG00000006158
ENSGALG00000006172
ENSGALG00000006209
ENSGALG00000006216
ENSGALG00000006221
ENSGALG00000006258
ENSGALG00000006259
ENSGALG00000006260
ENSGALG00000006281
ENSGALG00000006290
ENSGALG00000006309
ENSGALG00000006314
ENSGALG00000006323
ENSGALG00000006352
ENSGALG00000006355
ENSGALG00000006360
ENSGALG00000006368
ENSGALG00000006401
ENSGALG00000006403
ENSGALG00000006410
ENSGALG00000006424
ENSGALG00000006445
ENSGALG00000006449
ENSGALG00000006453
ENSGALG00000006455
ENSGALG00000006467
ENSGALG00000006473
ENSGALG00000006508
ENSGALG00000006523
ENSGALG00000006526
ENSGALG00000006563
ENSGALG00000006564
ENSGALG00000006572
ENSGALG00000006609
ENSGALG00000006624
ENSGALG00000006627
ENSGALG00000006637
ENSGALG00000006640
ENSGALG00000006647
ENSGALG00000006652
ENSGALG00000006656
ENSGALG00000006681
ENSGALG00000006697
ENSGALG00000006713
ENSGALG00000006719
ENSGALG00000006722
ENSGALG00000006795
ENSGALG00000006810
ENSGALG00000006811
ENSGALG00000006818
ENSGALG00000006821
ENSGALG00000006833
ENSGALG00000006864
ENSGALG00000006891
ENSGALG00000006929
ENSGALG00000006934
ENSGALG00000006956
ENSGALG00000006992
ENSGALG00000007000
ENSGALG00000007017
ENSGALG00000007041
ENSGALG00000007054
ENSGALG00000007065
ENSGALG00000007072
ENSGALG00000007093
ENSGALG00000007098
ENSGALG00000007103
ENSGALG00000007112
ENSGALG00000007128
ENSGALG00000007132
ENSGALG00000007145
ENSGALG00000007155
ENSGALG00000007169
ENSGALG00000007222
ENSGALG00000007227
ENSGALG00000007233
ENSGALG00000007246
ENSGALG00000007260
ENSGALG00000007268
ENSGALG00000007284
ENSGALG00000007289
ENSGALG00000007351
ENSGALG00000007357
ENSGALG00000007366
ENSGALG00000007367
ENSGALG00000007388
ENSGALG00000007394
ENSGALG00000007441
ENSGALG00000007484
ENSGALG00000007528
ENSGALG00000007565
ENSGALG00000007588
ENSGALG00000007593
ENSGALG00000007608
ENSGALG00000007617
ENSGALG00000007623
ENSGALG00000007652
ENSGALG00000007689
ENSGALG00000007742
ENSGALG00000007748
ENSGALG00000007752
ENSGALG00000007759
ENSGALG00000007788
ENSGALG00000007839
ENSGALG00000007843
ENSGALG00000007845
ENSGALG00000007849
ENSGALG00000007866
ENSGALG00000007871
ENSGALG00000007885
ENSGALG00000007906
ENSGALG00000007908
ENSGALG00000007912
ENSGALG00000007929
ENSGALG00000007944
ENSGALG00000007963
ENSGALG00000007989
ENSGALG00000007993
ENSGALG00000008044
ENSGALG00000008051
ENSGALG00000008053
ENSGALG00000008080
ENSGALG00000008098
ENSGALG00000008104
ENSGALG00000008174
ENSGALG00000008188
ENSGALG00000008193
ENSGALG00000008215
ENSGALG00000008217
ENSGALG00000008219
ENSGALG00000008222
ENSGALG00000008253
ENSGALG00000008255
ENSGALG00000008257
ENSGALG00000008281
ENSGALG00000008298
ENSGALG00000008332
ENSGALG00000008336
ENSGALG00000008339
ENSGALG00000008351
ENSGALG00000008353
ENSGALG00000008368
ENSGALG00000008370
ENSGALG00000008378
ENSGALG00000008393
ENSGALG00000008407
ENSGALG00000008433
ENSGALG00000008434
ENSGALG00000008439
ENSGALG00000008442
ENSGALG00000008459
ENSGALG00000008474
ENSGALG00000008475
ENSGALG00000008486
ENSGALG00000008494
ENSGALG00000008499
ENSGALG00000008501
ENSGALG00000008515
ENSGALG00000008547
ENSGALG00000008549
ENSGALG00000008593
ENSGALG00000008601
ENSGALG00000008611
ENSGALG00000008627
ENSGALG00000008648
ENSGALG00000008677
ENSGALG00000008740
ENSGALG00000008747
ENSGALG00000008774
ENSGALG00000008794
ENSGALG00000008805
ENSGALG00000008834
ENSGALG00000008837
ENSGALG00000008848
ENSGALG00000008871
ENSGALG00000008881
ENSGALG00000008883
ENSGALG00000008885
ENSGALG00000008906
ENSGALG00000008918
ENSGALG00000008932
ENSGALG00000008941
ENSGALG00000008957
ENSGALG00000008973
ENSGALG00000009003
ENSGALG00000009012
ENSGALG00000009027
ENSGALG00000009035
ENSGALG00000009045
ENSGALG00000009066
ENSGALG00000009097
ENSGALG00000009103
ENSGALG00000009107
ENSGALG00000009134
ENSGALG00000009145
ENSGALG00000009168
ENSGALG00000009173
ENSGALG00000009201
ENSGALG00000009248
ENSGALG00000009261
ENSGALG00000009273
ENSGALG00000009274
ENSGALG00000009298
ENSGALG00000009301
ENSGALG00000009302
ENSGALG00000009304
ENSGALG00000009325
ENSGALG00000009346
ENSGALG00000009385
ENSGALG00000009396
ENSGALG00000009405
ENSGALG00000009414
ENSGALG00000009415
ENSGALG00000009424
ENSGALG00000009435
ENSGALG00000009437
ENSGALG00000009440
ENSGALG00000009446
ENSGALG00000009456
ENSGALG00000009463
ENSGALG00000009470
ENSGALG00000009488
ENSGALG00000009505
ENSGALG00000009512
ENSGALG00000009528
ENSGALG00000009565
ENSGALG00000009601
ENSGALG00000009626
ENSGALG00000009650
ENSGALG00000009665
ENSGALG00000009669
ENSGALG00000009670
ENSGALG00000009689
ENSGALG00000009690
ENSGALG00000009719
ENSGALG00000009725
ENSGALG00000009732
ENSGALG00000009754
ENSGALG00000009822
ENSGALG00000009825
ENSGALG00000009835
ENSGALG00000009844
ENSGALG00000009845
ENSGALG00000009850
ENSGALG00000009859
ENSGALG00000009861
ENSGALG00000009864
ENSGALG00000009865
ENSGALG00000009880
ENSGALG00000009895
ENSGALG00000009905
ENSGALG00000009926
ENSGALG00000009954
ENSGALG00000009982
ENSGALG00000009983
ENSGALG00000009992
ENSGALG00000009995
ENSGALG00000010017
ENSGALG00000010027
ENSGALG00000010049
ENSGALG00000010050
ENSGALG00000010071
ENSGALG00000010084
ENSGALG00000010118
ENSGALG00000010125
ENSGALG00000010145
ENSGALG00000010150
ENSGALG00000010151
ENSGALG00000010163
ENSGALG00000010179
ENSGALG00000010189
ENSGALG00000010197
ENSGALG00000010200
ENSGALG00000010211
ENSGALG00000010217
ENSGALG00000010237
ENSGALG00000010238
ENSGALG00000010252
ENSGALG00000010253
ENSGALG00000010255
ENSGALG00000010294
ENSGALG00000010315
ENSGALG00000010319
ENSGALG00000010320
ENSGALG00000010340
ENSGALG00000010356
ENSGALG00000010364
ENSGALG00000010377
ENSGALG00000010379
ENSGALG00000010400
ENSGALG00000010422
ENSGALG00000010427
ENSGALG00000010448
ENSGALG00000010464
ENSGALG00000010490
ENSGALG00000010505
ENSGALG00000010518
ENSGALG00000010533
ENSGALG00000010535
ENSGALG00000010542
ENSGALG00000010560
ENSGALG00000010583
ENSGALG00000010589
ENSGALG00000010643
ENSGALG00000010646
ENSGALG00000010664
ENSGALG00000010683
ENSGALG00000010698
ENSGALG00000010706
ENSGALG00000010733
ENSGALG00000010734
ENSGALG00000010745
ENSGALG00000010748
ENSGALG00000010772
ENSGALG00000010794
ENSGALG00000010827
ENSGALG00000010829
ENSGALG00000010835
ENSGALG00000010840
ENSGALG00000010850
ENSGALG00000010870
ENSGALG00000010875
ENSGALG00000010898
ENSGALG00000010924
ENSGALG00000010928
ENSGALG00000010931
ENSGALG00000010956
ENSGALG00000010958
ENSGALG00000010969
ENSGALG00000010995
ENSGALG00000010997
ENSGALG00000010998
ENSGALG00000011054
ENSGALG00000011071
ENSGALG00000011076
ENSGALG00000011088
ENSGALG00000011099
ENSGALG00000011109
ENSGALG00000011117
ENSGALG00000011127
ENSGALG00000011128
ENSGALG00000011145
ENSGALG00000011157
ENSGALG00000011162
ENSGALG00000011181
ENSGALG00000011200
ENSGALG00000011224
ENSGALG00000011228
ENSGALG00000011250
ENSGALG00000011264
ENSGALG00000011269
ENSGALG00000011274
ENSGALG00000011284
ENSGALG00000011300
ENSGALG00000011306
ENSGALG00000011319
ENSGALG00000011350
ENSGALG00000011404
ENSGALG00000011426
ENSGALG00000011445
ENSGALG00000011446
ENSGALG00000011456
ENSGALG00000011476
ENSGALG00000011478
ENSGALG00000011514
ENSGALG00000011528
ENSGALG00000011535
ENSGALG00000011549
ENSGALG00000011564
ENSGALG00000011608
ENSGALG00000011663
ENSGALG00000011680
ENSGALG00000011686
ENSGALG00000011689
ENSGALG00000011708
ENSGALG00000011713
ENSGALG00000011720
ENSGALG00000011740
ENSGALG00000011797
ENSGALG00000011800
ENSGALG00000011823
ENSGALG00000011847
ENSGALG00000011883
ENSGALG00000011885
ENSGALG00000011921
ENSGALG00000011931
ENSGALG00000011962
ENSGALG00000011965
ENSGALG00000011974
ENSGALG00000011975
ENSGALG00000011994
ENSGALG00000012006
ENSGALG00000012020
ENSGALG00000012027
ENSGALG00000012044
ENSGALG00000012045
ENSGALG00000012049
ENSGALG00000012072
ENSGALG00000012077
ENSGALG00000012110
ENSGALG00000012124
ENSGALG00000012126
ENSGALG00000012127
ENSGALG00000012142
ENSGALG00000012146
ENSGALG00000012151
ENSGALG00000012154
ENSGALG00000012190
ENSGALG00000012193
ENSGALG00000012211
ENSGALG00000012224
ENSGALG00000012226
ENSGALG00000012228
ENSGALG00000012235
ENSGALG00000012239
ENSGALG00000012280
ENSGALG00000012289
ENSGALG00000012327
ENSGALG00000012329
ENSGALG00000012346
ENSGALG00000012355
ENSGALG00000012367
ENSGALG00000012386
ENSGALG00000012387
ENSGALG00000012405
ENSGALG00000012438
ENSGALG00000012442
ENSGALG00000012446
ENSGALG00000012455
ENSGALG00000012462
ENSGALG00000012483
ENSGALG00000012484
ENSGALG00000012495
ENSGALG00000012505
ENSGALG00000012513
ENSGALG00000012575
ENSGALG00000012577
ENSGALG00000012583
ENSGALG00000012594
ENSGALG00000012620
ENSGALG00000012626
ENSGALG00000012644
ENSGALG00000012647
ENSGALG00000012650
ENSGALG00000012654
ENSGALG00000012683
ENSGALG00000012692
ENSGALG00000012710
ENSGALG00000012754
ENSGALG00000012756
ENSGALG00000012783
ENSGALG00000012790
ENSGALG00000012796
ENSGALG00000012799
ENSGALG00000012802
ENSGALG00000012821
ENSGALG00000012873
ENSGALG00000012885
ENSGALG00000012891
ENSGALG00000012913
ENSGALG00000012915
ENSGALG00000012916
ENSGALG00000012942
ENSGALG00000013005
ENSGALG00000013022
ENSGALG00000013037
ENSGALG00000013041
ENSGALG00000013051
ENSGALG00000013069
ENSGALG00000013085
ENSGALG00000013102
ENSGALG00000013194
ENSGALG00000013200
ENSGALG00000013211
ENSGALG00000013212
ENSGALG00000013218
ENSGALG00000013223
ENSGALG00000013239
ENSGALG00000013272
ENSGALG00000013306
ENSGALG00000013341
ENSGALG00000013403
ENSGALG00000013427
ENSGALG00000013583
ENSGALG00000013607
ENSGALG00000013617
ENSGALG00000013637
ENSGALG00000013660
ENSGALG00000013672
ENSGALG00000013728
ENSGALG00000013729
ENSGALG00000013750
ENSGALG00000013753
ENSGALG00000013766
ENSGALG00000013803
ENSGALG00000013862
ENSGALG00000013904
ENSGALG00000013935
ENSGALG00000013948
ENSGALG00000013954
ENSGALG00000013968
ENSGALG00000014023
ENSGALG00000014178
ENSGALG00000014179
ENSGALG00000014208
ENSGALG00000014218
ENSGALG00000014225
ENSGALG00000014236
ENSGALG00000014250
ENSGALG00000014283
ENSGALG00000014298
ENSGALG00000014381
ENSGALG00000014419
ENSGALG00000014421
ENSGALG00000014463
ENSGALG00000014514
ENSGALG00000014531
ENSGALG00000014559
ENSGALG00000014582
ENSGALG00000014603
ENSGALG00000014624
ENSGALG00000014646
ENSGALG00000014657
ENSGALG00000014684
ENSGALG00000014692
ENSGALG00000014698
ENSGALG00000014726
ENSGALG00000014736
ENSGALG00000014747
ENSGALG00000014758
ENSGALG00000014773
ENSGALG00000014775
ENSGALG00000014776
ENSGALG00000014786
ENSGALG00000014816
ENSGALG00000014825
ENSGALG00000014827
ENSGALG00000014828
ENSGALG00000014865
ENSGALG00000014867
ENSGALG00000014872
ENSGALG00000014884
ENSGALG00000014912
ENSGALG00000014923
ENSGALG00000014931
ENSGALG00000014954
ENSGALG00000014963
ENSGALG00000014965
ENSGALG00000014966
ENSGALG00000014999
ENSGALG00000015010
ENSGALG00000015014
ENSGALG00000015016
ENSGALG00000015018
ENSGALG00000015023
ENSGALG00000015024
ENSGALG00000015037
ENSGALG00000015044
ENSGALG00000015052
ENSGALG00000015058
ENSGALG00000015089
ENSGALG00000015094
ENSGALG00000015110
ENSGALG00000015112
ENSGALG00000015118
ENSGALG00000015126
ENSGALG00000015128
ENSGALG00000015152
ENSGALG00000015167
ENSGALG00000015196
ENSGALG00000015198
ENSGALG00000015207
ENSGALG00000015254
ENSGALG00000015284
ENSGALG00000015288
ENSGALG00000015290
ENSGALG00000015307
ENSGALG00000015323
ENSGALG00000015378
ENSGALG00000015379
ENSGALG00000015403
ENSGALG00000015419
ENSGALG00000015428
ENSGALG00000015435
ENSGALG00000015448
ENSGALG00000015451
ENSGALG00000015466
ENSGALG00000015483
ENSGALG00000015497
ENSGALG00000015511
ENSGALG00000015512
ENSGALG00000015519
ENSGALG00000015544
ENSGALG00000015554
ENSGALG00000015575
ENSGALG00000015593
ENSGALG00000015615
ENSGALG00000015623
ENSGALG00000015626
ENSGALG00000015647
ENSGALG00000015653
ENSGALG00000015664
ENSGALG00000015666
ENSGALG00000015673
ENSGALG00000015679
ENSGALG00000015683
ENSGALG00000015688
ENSGALG00000015718
ENSGALG00000015762
ENSGALG00000015767
ENSGALG00000015773
ENSGALG00000015797
ENSGALG00000015799
ENSGALG00000015820
ENSGALG00000015821
ENSGALG00000015822
ENSGALG00000015833
ENSGALG00000015834
ENSGALG00000015846
ENSGALG00000015865
ENSGALG00000015866
ENSGALG00000015874
ENSGALG00000015878
ENSGALG00000015896
ENSGALG00000015908
ENSGALG00000015910
ENSGALG00000015926
ENSGALG00000015935
ENSGALG00000015937
ENSGALG00000015967
ENSGALG00000015972
ENSGALG00000015977
ENSGALG00000015988
ENSGALG00000016022
ENSGALG00000016034
ENSGALG00000016042
ENSGALG00000016044
ENSGALG00000016047
ENSGALG00000016076
ENSGALG00000016078
ENSGALG00000016083
ENSGALG00000016087
ENSGALG00000016102
ENSGALG00000016112
ENSGALG00000016114
ENSGALG00000016138
ENSGALG00000016153
ENSGALG00000016176
ENSGALG00000016186
ENSGALG00000016195
ENSGALG00000016206
ENSGALG00000016226
ENSGALG00000016233
ENSGALG00000016246
ENSGALG00000016262
ENSGALG00000016299
ENSGALG00000016308
ENSGALG00000016329
ENSGALG00000016352
ENSGALG00000016375
ENSGALG00000016397
ENSGALG00000016399
ENSGALG00000016406
ENSGALG00000016411
ENSGALG00000016430
ENSGALG00000016464
ENSGALG00000016468
ENSGALG00000016477
ENSGALG00000016478
ENSGALG00000016485
ENSGALG00000016495
ENSGALG00000016518
ENSGALG00000016545
ENSGALG00000016555
ENSGALG00000016571
ENSGALG00000016575
ENSGALG00000016580
ENSGALG00000016581
ENSGALG00000016583
ENSGALG00000016584
ENSGALG00000016597
ENSGALG00000016607
ENSGALG00000016627
ENSGALG00000016675
ENSGALG00000016680
ENSGALG00000016713
ENSGALG00000016720
ENSGALG00000016727
ENSGALG00000016752
ENSGALG00000016753
ENSGALG00000016755
ENSGALG00000016758
ENSGALG00000016767
ENSGALG00000016769
ENSGALG00000016794
ENSGALG00000016796
ENSGALG00000016803
ENSGALG00000016823
ENSGALG00000016826
ENSGALG00000016833
ENSGALG00000016834
ENSGALG00000016837
ENSGALG00000016851
ENSGALG00000016860
ENSGALG00000016895
ENSGALG00000016899
ENSGALG00000016904
ENSGALG00000016905
ENSGALG00000016911
ENSGALG00000016922
ENSGALG00000016930
ENSGALG00000016932
ENSGALG00000016933
ENSGALG00000016971
ENSGALG00000016984
ENSGALG00000016996
ENSGALG00000017010
ENSGALG00000017046
ENSGALG00000017056
ENSGALG00000017059
ENSGALG00000017062
ENSGALG00000017065
ENSGALG00000017070
ENSGALG00000017074
ENSGALG00000017077
ENSGALG00000017083
ENSGALG00000017103
ENSGALG00000017134
ENSGALG00000017142
ENSGALG00000017167
ENSGALG00000017177
ENSGALG00000017178
ENSGALG00000017183
ENSGALG00000017235
ENSGALG00000017238
ENSGALG00000017254
ENSGALG00000017295
ENSGALG00000017311
ENSGALG00000017326
ENSGALG00000017327
ENSGALG00000017332
ENSGALG00000017334
ENSGALG00000017372
ENSGALG00000017374
ENSGALG00000017418
ENSGALG00000017436
ENSGALG00000017658
ENSGALG00000018942
ENSGALG00000018946
ENSGALG00000018947
ENSGALG00000018998
ENSGALG00000019019
ENSGALG00000019077
ENSGALG00000019094
ENSGALG00000019229
ENSGALG00000019280
ENSGALG00000019514
ENSGALG00000019524
ENSGALG00000019640
ENSGALG00000019690
ENSGALG00000019696
ENSGALG00000019761
ENSGALG00000019794
ENSGALG00000019842
ENSGALG00000019921
ENSGALG00000020180
ENSGALG00000020210
ENSGALG00000020249
ENSGALG00000020505
ENSGALG00000020522
ENSGALG00000020627
ENSGALG00000020956
ENSGALG00000021009
ENSGALG00000021057
ENSGALG00000021143
ENSGALG00000021158
ENSGALG00000021443
ENSGALG00000021511
ENSGALG00000021520
ENSGALG00000021539
ENSGALG00000021694
ENSGALG00000022539
ENSGALG00000022802
ENSGALG00000022808
ENSGALG00000022838
ENSGALG00000022964
ENSGALG00000023114
ENSGALG00000023130
ENSGALG00000023157
ENSGALG00000023199
ENSGALG00000023395
ENSGALG00000023430
ENSGALG00000023435
ENSGALG00000023437
ENSGALG00000023517
ENSGALG00000023547
ENSGALG00000023571
ENSGALG00000023577
ENSGALG00000023781
ENSGALG00000023838
ENSGALG00000023886
ENSGALG00000023906
ENSGALG00000023961
ENSGALG00000024000
ENSGALG00000024004
ENSGALG00000024035
ENSGALG00000024083
ENSGALG00000024103
ENSGALG00000024272
ENSGALG00000024486
ENSGALG00000025729
ENSGALG00000025740
ENSGALG00000025817
ENSGALG00000025862
ENSGALG00000025875
ENSGALG00000025893
ENSGALG00000025916
ENSGALG00000025929
ENSGALG00000026017
ENSGALG00000026044
ENSGALG00000026055
ENSGALG00000026059
ENSGALG00000026080
ENSGALG00000026100
ENSGALG00000026119
ENSGALG00000026180
ENSGALG00000026225
ENSGALG00000026249
ENSGALG00000026295
ENSGALG00000026306
ENSGALG00000026313
ENSGALG00000026365
ENSGALG00000026431
ENSGALG00000026462
ENSGALG00000026507
ENSGALG00000026518
ENSGALG00000026531
ENSGALG00000026558
ENSGALG00000026560
ENSGALG00000026586
ENSGALG00000026718
ENSGALG00000026736
ENSGALG00000026744
ENSGALG00000026821
ENSGALG00000026836
ENSGALG00000026973
ENSGALG00000027026
ENSGALG00000027027
ENSGALG00000027070
ENSGALG00000027085
ENSGALG00000027091
ENSGALG00000027096
ENSGALG00000027132
ENSGALG00000027213
ENSGALG00000027232
ENSGALG00000027299
ENSGALG00000027313
ENSGALG00000027316
ENSGALG00000027330
ENSGALG00000027362
ENSGALG00000027389
ENSGALG00000027513
ENSGALG00000027532
ENSGALG00000027541
ENSGALG00000027569
ENSGALG00000027593
ENSGALG00000027603
ENSGALG00000027629
ENSGALG00000027630
ENSGALG00000027636
ENSGALG00000027639
ENSGALG00000027645
ENSGALG00000027821
ENSGALG00000027853
ENSGALG00000027861
ENSGALG00000027891
ENSGALG00000027897
ENSGALG00000027907
ENSGALG00000027932
ENSGALG00000027934
ENSGALG00000027943
ENSGALG00000027998
ENSGALG00000028005
ENSGALG00000028041
ENSGALG00000028047
ENSGALG00000028048
ENSGALG00000028063
ENSGALG00000028075
ENSGALG00000028081
ENSGALG00000028128
ENSGALG00000028130
ENSGALG00000028141
ENSGALG00000028174
ENSGALG00000028193
ENSGALG00000028223
ENSGALG00000028276
ENSGALG00000028284
ENSGALG00000028310
ENSGALG00000028318
ENSGALG00000028420
ENSGALG00000028478
ENSGALG00000028483
ENSGALG00000028501
ENSGALG00000028508
ENSGALG00000028529
ENSGALG00000028560
ENSGALG00000028565
ENSGALG00000028570
ENSGALG00000028576
ENSGALG00000028602
ENSGALG00000028691
ENSGALG00000028770
ENSGALG00000028803
ENSGALG00000028810
ENSGALG00000028821
ENSGALG00000028826
ENSGALG00000028850
ENSGALG00000028853
ENSGALG00000028912
ENSGALG00000028949
ENSGALG00000028966
ENSGALG00000029022
ENSGALG00000029043
ENSGALG00000029070
ENSGALG00000029106
ENSGALG00000029131
ENSGALG00000029135
ENSGALG00000029151
ENSGALG00000029167

## Sheet: Xenopus laevis
XeXenL6RMv10000551m
XeXenL6RMv10000682m
XeXenL6RMv10000743m
XeXenL6RMv10001912m
XeXenL6RMv10002873m
XeXenL6RMv10003729m
XeXenL6RMv10004062m
XeXenL6RMv10004086m
XeXenL6RMv10004424m
XeXenL6RMv10005521m
XeXenL6RMv10005984m
XeXenL6RMv10006539m
XeXenL6RMv10006849m
XeXenL6RMv10007700m
XeXenL6RMv10008119m
XeXenL6RMv10008424m
XeXenL6RMv10008751m
XeXenL6RMv10008780m
XeXenL6RMv10008967m
XeXenL6RMv10009066m
XeXenL6RMv10009671m
XeXenL6RMv10009715m
XeXenL6RMv10009929m
XeXenL6RMv10010267m
XeXenL6RMv10010341m
XeXenL6RMv10010443m
XeXenL6RMv10010633m
XeXenL6RMv10010756m
XeXenL6RMv10011483m
XeXenL6RMv10011490m
XeXenL6RMv10011700m
XeXenL6RMv10011964m
XeXenL6RMv10012106m
XeXenL6RMv10012843m
XeXenL6RMv10012971m
XeXenL6RMv10013218m
XeXenL6RMv10014779m
XeXenL6RMv10016505m
XeXenL6RMv10016992m
XeXenL6RMv10017522m
XeXenL6RMv10018060m
XeXenL6RMv10018963m
XeXenL6RMv10018974m
XeXenL6RMv10019011m
XeXenL6RMv10019342m
XeXenL6RMv10019365m
XeXenL6RMv10019658m
XeXenL6RMv10019793m
XeXenL6RMv10019981m
XeXenL6RMv10020724m
XeXenL6RMv10021066m
XeXenL6RMv10021638m
XeXenL6RMv10022132m
XeXenL6RMv10022181m
XeXenL6RMv10022655m
XeXenL6RMv10022892m
XeXenL6RMv10023124m
XeXenL6RMv10023168m
XeXenL6RMv10023479m
XeXenL6RMv10024614m
XeXenL6RMv10025235m
XeXenL6RMv10025557m
XeXenL6RMv10025772m
XeXenL6RMv10027315m
XeXenL6RMv10027723m
XeXenL6RMv10028117m
XeXenL6RMv10028197m
XeXenL6RMv10028248m
XeXenL6RMv10028856m
XeXenL6RMv10029470m
XeXenL6RMv10031430m
XeXenL6RMv10031745m
XeXenL6RMv10032035m
XeXenL6RMv10032186m
XeXenL6RMv10032257m
XeXenL6RMv10032780m
XeXenL6RMv10032879m
XeXenL6RMv10033892m
XeXenL6RMv10034310m
XeXenL6RMv10034685m
XeXenL6RMv10034991m
XeXenL6RMv10035027m
XeXenL6RMv10035356m
XeXenL6RMv10035428m
XeXenL6RMv10035578m
XeXenL6RMv10035579m
XeXenL6RMv10035616m
XeXenL6RMv10035802m
XeXenL6RMv10036036m
XeXenL6RMv10036073m
XeXenL6RMv10036257m
XeXenL6RMv10036460m
XeXenL6RMv10036649m
XeXenL6RMv10036985m
XeXenL6RMv10037438m
XeXenL6RMv10037846m
XeXenL6RMv10038074m
XeXenL6RMv10038340m
XeXenL6RMv10038554m
XeXenL6RMv10038882m
XeXenL6RMv10039132m
XeXenL6RMv10039272m
XeXenL6RMv10040939m
XeXenL6RMv10040996m
XeXenL6RMv10041370m
XeXenL6RMv10041475m
XeXenL6RMv10041753m
XeXenL6RMv10042403m
XeXenL6RMv10044074m
XeXenL6RMv10044177m
XeXenL6RMv10044198m
XeXenL6RMv10044804m
XeXenL6RMv10044876m
XeXenL6RMv10045511m
XeXenL6RMv10045543m
XeXenL6RMv10046409m
XeXenL6RMv10046577m
XeXenL6RMv10046589m
XeXenL6RMv10046864m
XeXenL6RMv10046905m
XeXenL6RMv10047403m
XeXenL6RMv10047940m
XeXenL6RMv10048287m
XeXenL6RMv10048371m
XeXenL6RMv10048509m
XeXenL6RMv10048568m
XeXenL6RMv10049049m
XeXenL6RMv10049473m
XeXenL6RMv10050083m
XeXenL6RMv10050412m
XeXenL6RMv10050700m
XeXenL6RMv10051475m
XeXenL6RMv10051632m
XeXenL6RMv10051713m
XeXenL6RMv10052282m
XeXenL6RMv10053191m
XeXenL6RMv10053399m
XeXenL6RMv10053515m
XeXenL6RMv10053823m
XeXenL6RMv10053986m
XeXenL6RMv10054360m
XeXenL6RMv10054382m
XeXenL6RMv10055325m
XeXenL6RMv10055674m
XeXenL6RMv10055777m

## Sheet: Xenopus tropicalis
ENSXETG00000000349
ENSXETG00000000509
ENSXETG00000000725
ENSXETG00000000797
ENSXETG00000001070
ENSXETG00000001331
ENSXETG00000001624
ENSXETG00000001902
ENSXETG00000001920
ENSXETG00000001967
ENSXETG00000002036
ENSXETG00000002052
ENSXETG00000002206
ENSXETG00000002271
ENSXETG00000002603
ENSXETG00000002790
ENSXETG00000002816
ENSXETG00000002964
ENSXETG00000003077
ENSXETG00000003133
ENSXETG00000003391
ENSXETG00000003405
ENSXETG00000003472
ENSXETG00000003690
ENSXETG00000003707
ENSXETG00000003775
ENSXETG00000003892
ENSXETG00000004486
ENSXETG00000004614
ENSXETG00000004679
ENSXETG00000005091
ENSXETG00000005182
ENSXETG00000005188
ENSXETG00000005532
ENSXETG00000005673
ENSXETG00000005675
ENSXETG00000005968
ENSXETG00000006230
ENSXETG00000006349
ENSXETG00000006394
ENSXETG00000006420
ENSXETG00000006647
ENSXETG00000007180
ENSXETG00000007241
ENSXETG00000007396
ENSXETG00000007400
ENSXETG00000007431
ENSXETG00000007555
ENSXETG00000007575
ENSXETG00000007768
ENSXETG00000008249
ENSXETG00000008253
ENSXETG00000008478
ENSXETG00000008715
ENSXETG00000009166
ENSXETG00000009376
ENSXETG00000009395
ENSXETG00000009475
ENSXETG00000009830
ENSXETG00000009943
ENSXETG00000010000
ENSXETG00000010133
ENSXETG00000010166
ENSXETG00000010174
ENSXETG00000010325
ENSXETG00000010401
ENSXETG00000010540
ENSXETG00000010633
ENSXETG00000010777
ENSXETG00000010943
ENSXETG00000011158
ENSXETG00000011186
ENSXETG00000011309
ENSXETG00000011383
ENSXETG00000011434
ENSXETG00000011486
ENSXETG00000011574
ENSXETG00000011608
ENSXETG00000011664
ENSXETG00000011749
ENSXETG00000011776
ENSXETG00000011833
ENSXETG00000012007
ENSXETG00000012041
ENSXETG00000012050
ENSXETG00000012527
ENSXETG00000012908
ENSXETG00000013225
ENSXETG00000013354
ENSXETG00000013366
ENSXETG00000013426
ENSXETG00000013577
ENSXETG00000013590
ENSXETG00000013742
ENSXETG00000013900
ENSXETG00000014058
ENSXETG00000014704
ENSXETG00000014758
ENSXETG00000014797
ENSXETG00000014807
ENSXETG00000015042
ENSXETG00000015419
ENSXETG00000015437
ENSXETG00000015575
ENSXETG00000015748
ENSXETG00000016034
ENSXETG00000016211
ENSXETG00000016477
ENSXETG00000016949
ENSXETG00000016983
ENSXETG00000017099
ENSXETG00000017283
ENSXETG00000017509
ENSXETG00000017662
ENSXETG00000017688
ENSXETG00000017927
ENSXETG00000018229
ENSXETG00000018527
ENSXETG00000018654
ENSXETG00000018735
ENSXETG00000018746
ENSXETG00000019086
ENSXETG00000019180
ENSXETG00000019384
ENSXETG00000019385
ENSXETG00000019519
ENSXETG00000019713
ENSXETG00000020143
ENSXETG00000020336
ENSXETG00000020537
ENSXETG00000020978
ENSXETG00000020986
ENSXETG00000021035
ENSXETG00000021114
ENSXETG00000021435
ENSXETG00000021858
ENSXETG00000021964
ENSXETG00000021990
ENSXETG00000022017
ENSXETG00000022259
ENSXETG00000022336
ENSXETG00000022348
ENSXETG00000022408
ENSXETG00000022543
ENSXETG00000022636
ENSXETG00000022646
ENSXETG00000022689
ENSXETG00000022877
ENSXETG00000022924
ENSXETG00000022935
ENSXETG00000023079
ENSXETG00000023427
ENSXETG00000023441
ENSXETG00000023509
ENSXETG00000023806
ENSXETG00000023840
ENSXETG00000023986
ENSXETG00000024105
ENSXETG00000024182
ENSXETG00000024641
ENSXETG00000024861
ENSXETG00000026029
ENSXETG00000026343
ENSXETG00000026395
ENSXETG00000027350
ENSXETG00000027983
ENSXETG00000028057
ENSXETG00000029920
ENSXETG00000029948
ENSXETG00000030063
ENSXETG00000030080
ENSXETG00000030115
ENSXETG00000030878
ENSXETG00000031178
ENSXETG00000031179
ENSXETG00000031418
ENSXETG00000031467
ENSXETG00000031853
ENSXETG00000031913
ENSXETG00000032133
ENSXETG00000032189
ENSXETG00000032196
ENSXETG00000032198
ENSXETG00000032689
ENSXETG00000032948
ENSXETG00000032951
ENSXETG00000033238
ENSXETG00000033360
ENSXETG00000033424
ENSXETG00000033451
ENSXETG00000033546
ENSXETG00000033712
ENSXETG00000033760
ENSXETG00000034240
ENSXETG00000000215
ENSXETG00000000715
ENSXETG00000000717
ENSXETG00000000941
ENSXETG00000001141
ENSXETG00000001502
ENSXETG00000001727
ENSXETG00000001865
ENSXETG00000001882
ENSXETG00000001905
ENSXETG00000002257
ENSXETG00000002275
ENSXETG00000002423
ENSXETG00000002605
ENSXETG00000002721
ENSXETG00000002871
ENSXETG00000002945
ENSXETG00000003127
ENSXETG00000003349
ENSXETG00000003827
ENSXETG00000004027
ENSXETG00000004148
ENSXETG00000004200
ENSXETG00000004483
ENSXETG00000004798
ENSXETG00000004821
ENSXETG00000004959
ENSXETG00000005010
ENSXETG00000005160
ENSXETG00000005362
ENSXETG00000005418
ENSXETG00000005462
ENSXETG00000005841
ENSXETG00000006304
ENSXETG00000006433
ENSXETG00000006574
ENSXETG00000006641
ENSXETG00000007571
ENSXETG00000007664
ENSXETG00000007732
ENSXETG00000007986
ENSXETG00000008409
ENSXETG00000008519
ENSXETG00000008651
ENSXETG00000009105
ENSXETG00000009233
ENSXETG00000009282
ENSXETG00000009478
ENSXETG00000009658
ENSXETG00000009817
ENSXETG00000009957
ENSXETG00000010112
ENSXETG00000010119
ENSXETG00000010315
ENSXETG00000010424
ENSXETG00000010609
ENSXETG00000010630
ENSXETG00000011329
ENSXETG00000011473
ENSXETG00000011490
ENSXETG00000011784
ENSXETG00000011941
ENSXETG00000012352
ENSXETG00000012519
ENSXETG00000012650
ENSXETG00000012694
ENSXETG00000012929
ENSXETG00000013165
ENSXETG00000013234
ENSXETG00000013421
ENSXETG00000013496
ENSXETG00000013796
ENSXETG00000014068
ENSXETG00000014109
ENSXETG00000014123
ENSXETG00000014261
ENSXETG00000014601
ENSXETG00000014890
ENSXETG00000014937
ENSXETG00000015033
ENSXETG00000015273
ENSXETG00000015342
ENSXETG00000015421
ENSXETG00000015828
ENSXETG00000016426
ENSXETG00000016965
ENSXETG00000017204
ENSXETG00000017304
ENSXETG00000017359
ENSXETG00000017472
ENSXETG00000017555
ENSXETG00000017710
ENSXETG00000017907
ENSXETG00000017916
ENSXETG00000018040
ENSXETG00000018209
ENSXETG00000018269
ENSXETG00000018865
ENSXETG00000018926
ENSXETG00000019073
ENSXETG00000019423
ENSXETG00000019436
ENSXETG00000019898
ENSXETG00000020282
ENSXETG00000020303
ENSXETG00000020684
ENSXETG00000021397
ENSXETG00000021523
ENSXETG00000022042
ENSXETG00000022163
ENSXETG00000022215
ENSXETG00000022308
ENSXETG00000022422
ENSXETG00000022517
ENSXETG00000022768
ENSXETG00000022868
ENSXETG00000023342
ENSXETG00000023641
ENSXETG00000023880
ENSXETG00000024089
ENSXETG00000024732
ENSXETG00000024763
ENSXETG00000025139
ENSXETG00000025262
ENSXETG00000025335
ENSXETG00000026411
ENSXETG00000026578
ENSXETG00000026684
ENSXETG00000026902
ENSXETG00000027639
ENSXETG00000030227
ENSXETG00000030284
ENSXETG00000030673
ENSXETG00000031421
ENSXETG00000032001
ENSXETG00000032158
ENSXETG00000032171
ENSXETG00000032290
ENSXETG00000032862
ENSXETG00000033746
ENSXETG00000033840
ENSXETG00000034153

## Sheet: Danio rerio
ENSDARG00000001634
ENSDARG00000003235
ENSDARG00000003813
ENSDARG00000004171
ENSDARG00000005232
ENSDARG00000005374
ENSDARG00000005479
ENSDARG00000005561
ENSDARG00000006766
ENSDARG00000007216
ENSDARG00000007278
ENSDARG00000007863
ENSDARG00000009871
ENSDARG00000010297
ENSDARG00000010347
ENSDARG00000010936
ENSDARG00000012592
ENSDARG00000013150
ENSDARG00000013414
ENSDARG00000013990
ENSDARG00000014181
ENSDARG00000014274
ENSDARG00000014941
ENSDARG00000015053
ENSDARG00000015427
ENSDARG00000016813
ENSDARG00000017790
ENSDARG00000017844
ENSDARG00000017988
ENSDARG00000019442
ENSDARG00000020301
ENSDARG00000020609
ENSDARG00000021141
ENSDARG00000023330
ENSDARG00000026369
ENSDARG00000027586
ENSDARG00000028252
ENSDARG00000028663
ENSDARG00000028688
ENSDARG00000029043
ENSDARG00000029865
ENSDARG00000030408
ENSDARG00000030656
ENSDARG00000030803
ENSDARG00000031763
ENSDARG00000031971
ENSDARG00000032161
ENSDARG00000034043
ENSDARG00000034264
ENSDARG00000034396
ENSDARG00000035700
ENSDARG00000035838
ENSDARG00000035890
ENSDARG00000036070
ENSDARG00000036558
ENSDARG00000037182
ENSDARG00000037283
ENSDARG00000038938
ENSDARG00000039098
ENSDARG00000039666
ENSDARG00000039777
ENSDARG00000039910
ENSDARG00000040109
ENSDARG00000040198
ENSDARG00000040455
ENSDARG00000040492
ENSDARG00000040991
ENSDARG00000041869
ENSDARG00000041908
ENSDARG00000042210
ENSDARG00000042249
ENSDARG00000042635
ENSDARG00000042807
ENSDARG00000043550
ENSDARG00000045045
ENSDARG00000045850
ENSDARG00000051748
ENSDARG00000051936
ENSDARG00000051940
ENSDARG00000051971
ENSDARG00000052553
ENSDARG00000052713
ENSDARG00000052947
ENSDARG00000053395
ENSDARG00000054154
ENSDARG00000054259
ENSDARG00000054619
ENSDARG00000054632
ENSDARG00000056112
ENSDARG00000056587
ENSDARG00000057688
ENSDARG00000057770
ENSDARG00000058467
ENSDARG00000058871
ENSDARG00000059432
ENSDARG00000059629
ENSDARG00000059642
ENSDARG00000059798
ENSDARG00000059885
ENSDARG00000060176
ENSDARG00000060751
ENSDARG00000060875
ENSDARG00000061214
ENSDARG00000062101
ENSDARG00000062139
ENSDARG00000062209
ENSDARG00000062374
ENSDARG00000063097
ENSDARG00000063197
ENSDARG00000063381
ENSDARG00000063412
ENSDARG00000063416
ENSDARG00000067777
ENSDARG00000068289
ENSDARG00000069168
ENSDARG00000069521
ENSDARG00000069640
ENSDARG00000069866
ENSDARG00000070413
ENSDARG00000073861
ENSDARG00000073957
ENSDARG00000074521
ENSDARG00000074577
ENSDARG00000074967
ENSDARG00000075156
ENSDARG00000075815
ENSDARG00000076169
ENSDARG00000076518
ENSDARG00000076657
ENSDARG00000077119
ENSDARG00000077353
ENSDARG00000077526
ENSDARG00000079355
ENSDARG00000079468
ENSDARG00000079472
ENSDARG00000079670
ENSDARG00000086639
ENSDARG00000086645
ENSDARG00000087216
ENSDARG00000087321
ENSDARG00000087779
ENSDARG00000087956
ENSDARG00000088030
ENSDARG00000088817
ENSDARG00000089946
ENSDARG00000090802
ENSDARG00000090815
ENSDARG00000093572
ENSDARG00000095070
ENSDARG00000095774
ENSDARG00000000489
ENSDARG00000001127
ENSDARG00000002220
ENSDARG00000002487
ENSDARG00000003487
ENSDARG00000003803
ENSDARG00000003846
ENSDARG00000004472
ENSDARG00000004592
ENSDARG00000004597
ENSDARG00000004714
ENSDARG00000004851
ENSDARG00000004948
ENSDARG00000005799
ENSDARG00000006200
ENSDARG00000007285
ENSDARG00000008203
ENSDARG00000008305
ENSDARG00000008662
ENSDARG00000009131
ENSDARG00000009142
ENSDARG00000009372
ENSDARG00000010160
ENSDARG00000010586
ENSDARG00000010681
ENSDARG00000012215
ENSDARG00000013533
ENSDARG00000014105
ENSDARG00000014329
ENSDARG00000015344
ENSDARG00000015537
ENSDARG00000015610
ENSDARG00000015824
ENSDARG00000015880
ENSDARG00000016484
ENSDARG00000016739
ENSDARG00000017047
ENSDARG00000017180
ENSDARG00000017439
ENSDARG00000018691
ENSDARG00000019060
ENSDARG00000019300
ENSDARG00000019529
ENSDARG00000019990
ENSDARG00000020057
ENSDARG00000020708
ENSDARG00000020820
ENSDARG00000022160
ENSDARG00000022727
ENSDARG00000022983
ENSDARG00000023657
ENSDARG00000024416
ENSDARG00000024471
ENSDARG00000024966
ENSDARG00000026499
ENSDARG00000026801
ENSDARG00000026871
ENSDARG00000026882
ENSDARG00000027957
ENSDARG00000028661
ENSDARG00000029100
ENSDARG00000029172
ENSDARG00000029402
ENSDARG00000031277
ENSDARG00000031712
ENSDARG00000031891
ENSDARG00000032116
ENSDARG00000033234
ENSDARG00000033735
ENSDARG00000034001
ENSDARG00000034178
ENSDARG00000034420
ENSDARG00000035682
ENSDARG00000035751
ENSDARG00000035860
ENSDARG00000035895
ENSDARG00000035970
ENSDARG00000036222
ENSDARG00000036279
ENSDARG00000036308
ENSDARG00000036335
ENSDARG00000037108
ENSDARG00000037229
ENSDARG00000037334
ENSDARG00000037478
ENSDARG00000037587
ENSDARG00000037870
ENSDARG00000037968
ENSDARG00000038414
ENSDARG00000039647
ENSDARG00000040008
ENSDARG00000040041
ENSDARG00000040121
ENSDARG00000040291
ENSDARG00000040344
ENSDARG00000040518
ENSDARG00000040926
ENSDARG00000041113
ENSDARG00000042180
ENSDARG00000042465
ENSDARG00000042590
ENSDARG00000042846
ENSDARG00000042864
ENSDARG00000042974
ENSDARG00000043031
ENSDARG00000043531
ENSDARG00000044402
ENSDARG00000044485
ENSDARG00000044556
ENSDARG00000044577
ENSDARG00000044628
ENSDARG00000044719
ENSDARG00000045066
ENSDARG00000045167
ENSDARG00000045254
ENSDARG00000045351
ENSDARG00000045696
ENSDARG00000051780
ENSDARG00000051852
ENSDARG00000051902
ENSDARG00000052131
ENSDARG00000052154
ENSDARG00000052326
ENSDARG00000052371
ENSDARG00000052652
ENSDARG00000052695
ENSDARG00000052717
ENSDARG00000053665
ENSDARG00000054606
ENSDARG00000054794
ENSDARG00000055129
ENSDARG00000055510
ENSDARG00000055577
ENSDARG00000055760
ENSDARG00000056138
ENSDARG00000056167
ENSDARG00000056473
ENSDARG00000056648
ENSDARG00000056666
ENSDARG00000056886
ENSDARG00000057481
ENSDARG00000057913
ENSDARG00000058473
ENSDARG00000058780
ENSDARG00000058941
ENSDARG00000059280
ENSDARG00000059553
ENSDARG00000059658
ENSDARG00000059707
ENSDARG00000059832
ENSDARG00000059841
ENSDARG00000059897
ENSDARG00000060368
ENSDARG00000060549
ENSDARG00000060639
ENSDARG00000061580
ENSDARG00000061829
ENSDARG00000061923
ENSDARG00000062297
ENSDARG00000062549
ENSDARG00000062577
ENSDARG00000062581
ENSDARG00000062633
ENSDARG00000062915
ENSDARG00000062936
ENSDARG00000062954
ENSDARG00000063141
ENSDARG00000067677
ENSDARG00000067850
ENSDARG00000068257
ENSDARG00000068286
ENSDARG00000068886
ENSDARG00000069280
ENSDARG00000070173
ENSDARG00000070478
ENSDARG00000070487
ENSDARG00000070781
ENSDARG00000070828
ENSDARG00000071751
ENSDARG00000073771
ENSDARG00000074271
ENSDARG00000074498
ENSDARG00000074502
ENSDARG00000074533
ENSDARG00000074581
ENSDARG00000074671
ENSDARG00000074790
ENSDARG00000075358
ENSDARG00000075369
ENSDARG00000075853
ENSDARG00000076020
ENSDARG00000076528
ENSDARG00000076798
ENSDARG00000076847
ENSDARG00000077151
ENSDARG00000077162
ENSDARG00000077229
ENSDARG00000077317
ENSDARG00000077514
ENSDARG00000078258
ENSDARG00000078302
ENSDARG00000078456
ENSDARG00000078650
ENSDARG00000078701
ENSDARG00000079253
ENSDARG00000079313
ENSDARG00000079366
ENSDARG00000079414
ENSDARG00000079634
ENSDARG00000079671
ENSDARG00000086156
ENSDARG00000086461
ENSDARG00000087000
ENSDARG00000088210
ENSDARG00000088232
ENSDARG00000088468
ENSDARG00000089225
ENSDARG00000089606
ENSDARG00000089923
ENSDARG00000090725
ENSDARG00000091086
ENSDARG00000092638
ENSDARG00000093460
ENSDARG00000096271
ENSDARG00000001129
ENSDARG00000001559
ENSDARG00000001994
ENSDARG00000002240
ENSDARG00000002523
ENSDARG00000003046
ENSDARG00000003208
ENSDARG00000003293
ENSDARG00000004148
ENSDARG00000004328
ENSDARG00000004386
ENSDARG00000004580
ENSDARG00000004796
ENSDARG00000004869
ENSDARG00000005500
ENSDARG00000006145
ENSDARG00000006812
ENSDARG00000006896
ENSDARG00000007377
ENSDARG00000007531
ENSDARG00000007889
ENSDARG00000008454
ENSDARG00000008740
ENSDARG00000009738
ENSDARG00000010008
ENSDARG00000010270
ENSDARG00000010425
ENSDARG00000011127
ENSDARG00000011404
ENSDARG00000011769
ENSDARG00000012071
ENSDARG00000012078
ENSDARG00000012338
ENSDARG00000012482
ENSDARG00000013000
ENSDARG00000013005
ENSDARG00000013813
ENSDARG00000013938
ENSDARG00000014123
ENSDARG00000016854
ENSDARG00000017006
ENSDARG00000017067
ENSDARG00000017337
ENSDARG00000017466
ENSDARG00000018259
ENSDARG00000018285
ENSDARG00000018434
ENSDARG00000018902
ENSDARG00000019013
ENSDARG00000019418
ENSDARG00000019489
ENSDARG00000020594
ENSDARG00000021584
ENSDARG00000021909
ENSDARG00000022187
ENSDARG00000022309
ENSDARG00000022569
ENSDARG00000023174
ENSDARG00000023316
ENSDARG00000025554
ENSDARG00000025747
ENSDARG00000026247
ENSDARG00000026664
ENSDARG00000027079
ENSDARG00000027740
ENSDARG00000029179
ENSDARG00000029263
ENSDARG00000030376
ENSDARG00000030633
ENSDARG00000031153
ENSDARG00000032565
ENSDARG00000032799
ENSDARG00000033855
ENSDARG00000034165
ENSDARG00000034423
ENSDARG00000034650
ENSDARG00000034808
ENSDARG00000034883
ENSDARG00000035171
ENSDARG00000035573
ENSDARG00000035660
ENSDARG00000036375
ENSDARG00000036966
ENSDARG00000037363
ENSDARG00000037570
ENSDARG00000038153
ENSDARG00000038574
ENSDARG00000038703
ENSDARG00000038941
ENSDARG00000039136
ENSDARG00000039434
ENSDARG00000039497
ENSDARG00000039521
ENSDARG00000039701
ENSDARG00000040627
ENSDARG00000041373
ENSDARG00000042027
ENSDARG00000042530
ENSDARG00000043559
ENSDARG00000044161
ENSDARG00000044433
ENSDARG00000044954
ENSDARG00000045087
ENSDARG00000045131
ENSDARG00000045594
ENSDARG00000045636
ENSDARG00000045945
ENSDARG00000046002
ENSDARG00000052115
ENSDARG00000052438
ENSDARG00000052480
ENSDARG00000052859
ENSDARG00000052894
ENSDARG00000053298
ENSDARG00000053684
ENSDARG00000054031
ENSDARG00000055271
ENSDARG00000055578
ENSDARG00000055825
ENSDARG00000056019
ENSDARG00000056374
ENSDARG00000056414
ENSDARG00000056450
ENSDARG00000056979
ENSDARG00000057052
ENSDARG00000057726
ENSDARG00000057731
ENSDARG00000058004
ENSDARG00000058337
ENSDARG00000058370
ENSDARG00000059090
ENSDARG00000059483
ENSDARG00000059711
ENSDARG00000059806
ENSDARG00000059982
ENSDARG00000060496
ENSDARG00000060507
ENSDARG00000060539
ENSDARG00000060808
ENSDARG00000060893
ENSDARG00000061031
ENSDARG00000061047
ENSDARG00000061352
ENSDARG00000061371
ENSDARG00000061399
ENSDARG00000061647
ENSDARG00000061836
ENSDARG00000061915
ENSDARG00000062053
ENSDARG00000062165
ENSDARG00000062359
ENSDARG00000062457
ENSDARG00000062956
ENSDARG00000063007
ENSDARG00000063651
ENSDARG00000067741
ENSDARG00000067824
ENSDARG00000068019
ENSDARG00000068365
ENSDARG00000068596
ENSDARG00000069469
ENSDARG00000069737
ENSDARG00000070129
ENSDARG00000070266
ENSDARG00000070498
ENSDARG00000070903
ENSDARG00000071011
ENSDARG00000071395
ENSDARG00000071493
ENSDARG00000073978
ENSDARG00000074563
ENSDARG00000074669
ENSDARG00000074866
ENSDARG00000074930
ENSDARG00000075542
ENSDARG00000075713
ENSDARG00000075802
ENSDARG00000075806
ENSDARG00000075858
ENSDARG00000076262
ENSDARG00000076401
ENSDARG00000076691
ENSDARG00000077121
ENSDARG00000077249
ENSDARG00000077295
ENSDARG00000077467
ENSDARG00000077728
ENSDARG00000077791
ENSDARG00000077822
ENSDARG00000078023
ENSDARG00000078066
ENSDARG00000078308
ENSDARG00000078802
ENSDARG00000079062
ENSDARG00000079276
ENSDARG00000079306
ENSDARG00000079382
ENSDARG00000079391
ENSDARG00000079440
ENSDARG00000079591
ENSDARG00000079891
ENSDARG00000086618
ENSDARG00000087109
ENSDARG00000087467
ENSDARG00000087910
ENSDARG00000087916
ENSDARG00000088837
ENSDARG00000088925
ENSDARG00000089002
ENSDARG00000089260
ENSDARG00000089871
ENSDARG00000090418
ENSDARG00000092987
ENSDARG00000093799
ENSDARG00000094010
ENSDARG00000094353
ENSDARG00000094526
ENSDARG00000095288

## Sheet: Branchiostoma floridae
bf-105578
bf-106108
bf-114473
bf-115431
bf-115787
bf-117250
bf-117390
bf-118183
bf-119198
bf-119904
bf-119955
bf-121353
bf-123025
bf-124222
bf-125090
bf-125428
bf-125533
bf-126484
bf-127520
bf-128806
bf-128818
bf-130184
bf-147013
bf-174614
bf-199312
bf-215305
bf-216314
bf-217157
bf-217165
bf-220264
bf-230572
bf-231908
bf-232629
bf-233441
bf-237054
bf-243389
bf-245816
bf-260512
bf-261071
bf-265613
bf-266032
bf-269028
bf-276686
bf-277775
bf-278645
bf-279923
bf-281490
bf-283360
bf-62187
bf-63969
bf-72362
bf-81009
bf-83417
bf-86240
bf-87657
bf-90806
bf-95034
bf-95904
bf-113849
bf-114160
bf-114344
bf-114709
bf-115066
bf-117675
bf-118724
bf-119627
bf-120132
bf-122314
bf-122637
bf-123398
bf-124130
bf-124382
bf-124670
bf-125524
bf-125684
bf-126285
bf-126822
bf-127120
bf-127318
bf-129968
bf-130399
bf-160390
bf-200793
bf-201265
bf-202521
bf-206438
bf-206466
bf-232793
bf-233431
bf-234382
bf-241455
bf-264178
bf-277111
bf-279056
bf-62111
bf-63851
bf-69647
bf-69778
bf-72541
bf-72842
bf-75624
bf-79267
bf-80591
bf-82946
bf-83503
bf-83650
bf-83704
bf-84243
bf-87840
bf-90738
bf-90771
bf-93033
bf-95769
bf-97371

## Sheet: Ciona intestinalis
ENSCING00000000787
ENSCING00000001400
ENSCING00000001753
ENSCING00000001828
ENSCING00000001956
ENSCING00000002563
ENSCING00000002608
ENSCING00000002659
ENSCING00000002672
ENSCING00000002818
ENSCING00000003103
ENSCING00000003181
ENSCING00000003239
ENSCING00000003328
ENSCING00000003791
ENSCING00000004146
ENSCING00000004287
ENSCING00000004304
ENSCING00000004886
ENSCING00000005026
ENSCING00000005193
ENSCING00000005362
ENSCING00000005722
ENSCING00000005748
ENSCING00000005789
ENSCING00000005917
ENSCING00000006031
ENSCING00000006203
ENSCING00000006422
ENSCING00000006455
ENSCING00000006505
ENSCING00000006810
ENSCING00000006936
ENSCING00000007016
ENSCING00000007248
ENSCING00000007347
ENSCING00000007678
ENSCING00000007746
ENSCING00000007949
ENSCING00000008086
ENSCING00000008457
ENSCING00000008556
ENSCING00000008674
ENSCING00000008868
ENSCING00000009042
ENSCING00000009088
ENSCING00000009129
ENSCING00000009307
ENSCING00000009381
ENSCING00000009391
ENSCING00000010142
ENSCING00000011960
ENSCING00000012833
ENSCING00000012910
ENSCING00000013644
ENSCING00000014774
ENSCING00000014906
ENSCING00000015878
ENSCING00000016214
ENSCING00000018771
ENSCING00000019121
ENSCING00000019493
ENSCING00000019531
ENSCING00000019698
ENSCING00000020029
ENSCING00000020109
ENSCING00000020218
ENSCING00000020374
ENSCING00000020462
ENSCING00000022650
ENSCING00000022663
ENSCING00000024165
ENSCING00000024577
ENSCING00000024638
ENSCING00000025069
ENSCING00000000505
ENSCING00000000734
ENSCING00000001276
ENSCING00000002389
ENSCING00000002822
ENSCING00000003819
ENSCING00000003844
ENSCING00000004280
ENSCING00000004913
ENSCING00000005280
ENSCING00000005356
ENSCING00000005403
ENSCING00000005778
ENSCING00000005935
ENSCING00000006503
ENSCING00000006628
ENSCING00000007699
ENSCING00000008090
ENSCING00000008242
ENSCING00000008580
ENSCING00000008625
ENSCING00000008783
ENSCING00000009049
ENSCING00000009200
ENSCING00000010056
ENSCING00000012189
ENSCING00000012452
ENSCING00000013240
ENSCING00000014768
ENSCING00000015026
ENSCING00000017690
ENSCING00000018451
ENSCING00000020746
ENSCING00000021593
ENSCING00000021638
ENSCING00000021688
ENSCING00000021783
ENSCING00000022308
ENSCING00000022870
ENSCING00000023621
ENSCING00000023735
ENSCING00000024199
ENSCING00000024463
ENSCING00000025030

## Sheet: Crassostrea gigas
CGI_10000090
CGI_10000789
CGI_10000851
CGI_10000934
CGI_10001227
CGI_10001293
CGI_10001507
CGI_10001934
CGI_10002028
CGI_10002294
CGI_10003059
CGI_10003363
CGI_10004180
CGI_10004787
CGI_10004830
CGI_10004835
CGI_10004917
CGI_10005021
CGI_10005242
CGI_10005253
CGI_10005471
CGI_10005611
CGI_10005763
CGI_10006214
CGI_10006215
CGI_10006426
CGI_10006733
CGI_10006940
CGI_10006952
CGI_10007077
CGI_10007241
CGI_10007761
CGI_10007913
CGI_10008467
CGI_10008836
CGI_10009225
CGI_10009256
CGI_10009394
CGI_10009700
CGI_10010176
CGI_10010243
CGI_10010244
CGI_10010572
CGI_10010721
CGI_10010857
CGI_10010872
CGI_10010880
CGI_10010960
CGI_10011128
CGI_10011196
CGI_10011288
CGI_10011441
CGI_10011637
CGI_10012069
CGI_10012922
CGI_10013006
CGI_10013655
CGI_10013747
CGI_10013799
CGI_10013849
CGI_10014147
CGI_10014503
CGI_10014588
CGI_10014612
CGI_10014985
CGI_10015257
CGI_10015475
CGI_10015570
CGI_10015695
CGI_10015804
CGI_10016078
CGI_10017094
CGI_10017098
CGI_10017168
CGI_10017251
CGI_10018006
CGI_10018092
CGI_10018169
CGI_10018219
CGI_10018334
CGI_10018343
CGI_10018885
CGI_10018959
CGI_10019270
CGI_10019541
CGI_10020035
CGI_10020059
CGI_10020361
CGI_10020785
CGI_10020790
CGI_10020866
CGI_10021288
CGI_10021336
CGI_10021480
CGI_10021909
CGI_10021947
CGI_10022034
CGI_10022043
CGI_10022146
CGI_10022479
CGI_10022742
CGI_10022756
CGI_10022983
CGI_10023225
CGI_10023490
CGI_10023637
CGI_10023679
CGI_10023725
CGI_10023874
CGI_10023896
CGI_10023985
CGI_10024113
CGI_10024132
CGI_10024367
CGI_10024401
CGI_10024448
CGI_10024640
CGI_10024726
CGI_10024838
CGI_10024840
CGI_10024885
CGI_10025371
CGI_10025374
CGI_10025634
CGI_10025940
CGI_10026351
CGI_10026366
CGI_10026427
CGI_10026468
CGI_10026594
CGI_10026813
CGI_10027531
CGI_10027732
CGI_10027844
CGI_10027972
CGI_10028530
CGI_10028550
CGI_10028873
CGI_10000572
CGI_10000676
CGI_10001200
CGI_10001345
CGI_10001615
CGI_10002225
CGI_10002339
CGI_10002661
CGI_10003120
CGI_10003172
CGI_10003603
CGI_10003863
CGI_10003946
CGI_10004006
CGI_10004102
CGI_10004346
CGI_10004402
CGI_10004628
CGI_10004794
CGI_10005196
CGI_10005258
CGI_10005652
CGI_10005673
CGI_10006014
CGI_10006411
CGI_10007359
CGI_10008441
CGI_10009286
CGI_10009348
CGI_10009476
CGI_10009511
CGI_10009681
CGI_10009682
CGI_10009837
CGI_10009874
CGI_10010164
CGI_10010220
CGI_10010251
CGI_10010360
CGI_10010631
CGI_10010826
CGI_10010879
CGI_10010882
CGI_10011025
CGI_10011648
CGI_10012589
CGI_10012982
CGI_10013567
CGI_10014052
CGI_10014182
CGI_10014852
CGI_10015009
CGI_10015189
CGI_10015221
CGI_10015618
CGI_10015900
CGI_10016085
CGI_10016183
CGI_10016323
CGI_10017177
CGI_10017190
CGI_10017221
CGI_10017255
CGI_10017263
CGI_10017619
CGI_10017634
CGI_10017635
CGI_10017967
CGI_10018918
CGI_10019586
CGI_10019732
CGI_10020320
CGI_10020375
CGI_10020378
CGI_10020728
CGI_10020779
CGI_10020996
CGI_10021039
CGI_10021082
CGI_10021617
CGI_10021968
CGI_10022035
CGI_10022144
CGI_10022563
CGI_10023809
CGI_10024151
CGI_10024608
CGI_10024831
CGI_10024963
CGI_10025756
CGI_10025906
CGI_10027055
CGI_10027127
CGI_10027836
CGI_10027901
CGI_10028059
CGI_10028815
CGI_10028856
