# Supplementary material for: Comparative Gene Analysis in Chordate Embryonic Development Reveals Co-existence of Von Baer’s and Haeckel’s Postulates
Source: Research Square preprint supplement (doi:10.21203/rs.3.rs-579345/v1), 2021-06-17
Supplement: Supplementary file 16 [file 8747f26c6a4c71ac952438cf.xlsx]

## Sheet: Annotation
Supplementary Data 10. Annotation information for each species in this study.
Species	Figure label	Phylum	Genome	Gene annotation	Source
Mus musculus	Mm	Chordata	GRCm38	Mus_musculus.GRCm38.72.gtf	Ensembl v72
Gallus gallus	Gg	Chordata	Galgal4	Gallus_gallus.Galgal4.72.gtf	Ensembl v72
Pelodiscus sinensis	Ps	Chordata	PelSin_1.0	Pelodiscus_sinensis.PelSin_1.0.72.gtf	Ensembl v72
Xenopus tropicalis	Xt	Chordata	JGI_4.2	Xenopus_tropicalis.JGI_4.2.72.gtf.gz	Ensembl v72
Xenopus laevis	Xl	Chordata	Xenola_6.0_JGI	Xenla_primaryTrs.gff3	Xenbase
Danio rerio	Dr	Chordata	Zv9	Danio_rerio.Zv9.72.gtf	Ensembl v72
Branchiostoma floridae	Bf	Chordata	Bf. v2.0	Bfloridae_v1.0_FilteredModelsMappedToAssemblyv2.0.gff	JGI
Ciona intestinalis	Ci	Chordata	KH	Ciona_intestinalis.KH.72.gtf	Ensembl v72
Crassostrea gigas	Cg	Mollusca	GCA_000297895.1	Crassostrea_gigas.GCA_000297895.1.22.gtf	Ensembl metazoa

## Sheet: Expressed gene number
Supplementary Data 10. Summary of expressed gene number for each species
Species	Stage Number	Annotated protein coding gene number	Expressed Gene Number	Development-related gene number
Mus musculus	17	22780	16685	14348
Gallus gallus	13	15508	12648	10323
Pelodiscus sinensis	14	18188	13943	12155
Xenopus tropicalis	17	18442	15455	13583
Xenopus laevis	17	43025	31090	27786
Danio rerio	15	26241	20779	18639
Branchiostoma floridae	11	50817	20932	13139
Ciona intestinalis	20	16658	16347	14289
Crassostrea gigas	19	26089	23608	21198
Developmental stages was counted by species embryo phenotype from 2 cell to juvenile; Annotated protein coding gene was obtained from Ensembl; Expressed gene was defined as the gene which at least one sample with FPKM>1 across all samples; Developmental related gene was identified by polynomial test with Benjamini-Hochberg correction p-value< 0.05;
