# Supplementary material for: Comparative Gene Analysis in Chordate Embryonic Development Reveals Co-existence of Von Baer’s and Haeckel’s Postulates
Source: Research Square preprint supplement (doi:10.21203/rs.3.rs-579345/v1), 2021-06-17
Supplement: Supplementary file 17 [file 88d238157da1139f1e0078a3.xlsx]

## Sheet: KEGG pathway test for 6 species
Supplementary Data 4. Enriched GO functional annotation for developmental expression patterns CL1-6
Cluster	Pathway	P value BF correction <0.05
1	Spliceosome - Mus musculus (mouse)	1.17052e-16
1	Ribosome biogenesis in eukaryotes - Mus musculus (mouse)	1.37673e-08
1	Pyrimidine metabolism - Mus musculus (mouse)	0.0106666
1	RNA transport - Mus musculus (mouse)	4.02619e-05
1	RNA degradation - Mus musculus (mouse)	0.0307351
1	RNA polymerase - Mus musculus (mouse)	0.0171449
2	GABAergic synapse - Mus musculus (mouse)	0.0123423
2	Oxytocin signaling pathway - Mus musculus (mouse)	0.000928933
2	cGMP-PKG signaling pathway - Mus musculus (mouse)	0.0250548
2	Gap junction - Mus musculus (mouse)	0.0449793
2	Focal adhesion - Mus musculus (mouse)	0.000144876
2	Complement and coagulation cascades - Mus musculus (mouse)	0.00240574
2	Renin secretion - Mus musculus (mouse)	0.0321708
2	PI3K-Akt signaling pathway - Mus musculus (mouse)	0.00781717
2	ECM-receptor interaction - Mus musculus (mouse)	0.000728605
3	Ribosome - Mus musculus (mouse)	1.64608e-07
3	Proteasome - Mus musculus (mouse)	0.0226301
5	Mineral absorption - Mus musculus (mouse)	0.0448368
For GO enrichment test, the “elim” algorithm of topGO [35] was chosen to eliminate the hierarchical dependency of the GO terms. Fisher's exact test was applied for each GO term. The background set consisted of all development-related genes orthologous among six vertebrate species (2,038 genes) and nine chordate species (244 genes), respectively. For the test of vertebrate gene clusters, Benjamini…

## Sheet: KEGG pathway test for 9 species
Cluster	Pathway	P value without correction <0.05
1	Spliceosome - Mus musculus (mouse)	0.0234509
2	Ribosome - Mus musculus (mouse)	0.0479552
2	Aminoacyl-tRNA biosynthesis - Mus musculus (mouse)	0.0479552
3	Thyroid hormone synthesis - Mus musculus (mouse)	0.0456976
3	Endocytosis - Mus musculus (mouse)	0.0368206
4	Oxytocin signaling pathway - Mus musculus (mouse)	0.0142927
4	cGMP-PKG signaling pathway - Mus musculus (mouse)	0.00504202
4	Renin secretion - Mus musculus (mouse)	0.00504202
4	Valine leucine and isoleucine degradation - Mus musculus (mouse)	0.00504202
5	Non-alcoholic fatty liver disease (NAFLD) - Mus musculus (mouse)	0.0257448
5	Alzheimers disease - Mus musculus (mouse)	0.0478591
5	Pentose phosphate pathway - Mus musculus (mouse)	0.0065189
5	Oxidative phosphorylation - Mus musculus (mouse)	0.0257448
5	Huntingtons disease - Mus musculus (mouse)	0.0478591
5	Parkinsons disease - Mus musculus (mouse)	0.0092437
6	Hepatitis C - Mus musculus (mouse)	0.0168067
6	Measles - Mus musculus (mouse)	0.0168067
6	Non-alcoholic fatty liver disease (NAFLD) - Mus musculus (mouse)	0.0491736
6	Influenza A - Mus musculus (mouse)	0.0168067
The P-value was from hypergeometric testing approach using phyer in R package for KEGG pathway enrichment without controlling the false discovery rate. All expressed orthologous development-related genes were considered as background genes. The pathways were downloaded from KEGG website for mouse.

## Sheet: GO enrichment test for 6 specie
cluster	GO.ID	Term	Annotated	Significant	Expected	Fisher.elim
1	GO:0044822	poly(A) RNA binding	273	183	98.24	1.8e-29
1	GO:0003723	RNA binding	356	235	128.1	6.1e-08
1	GO:0003899	DNA-directed RNA polymerase activity	18	15	6.48	4.8e-05
1	GO:0006397	mRNA processing	105	89	38.02	3e-13
1	GO:0006364	rRNA processing	50	45	18.11	1.6e-11
1	GO:0000398	mRNA splicing via spliceosome	55	44	19.92	5.1e-10
1	GO:0006281	DNA repair	100	62	36.21	6.8e-08
1	GO:0008380	RNA splicing	91	72	32.95	1.5e-07
1	GO:0051028	mRNA transport	30	24	10.86	9.9e-07
1	GO:0000956	nuclear-transcribed mRNA catabolic proce...	19	16	6.88	2.2e-05
1	GO:0006355	regulation of transcription DNA-template	416	191	150.65	2.8e-05
1	GO:0019827	stem cell population maintenance	30	22	10.86	3.4e-05
1	GO:0030490	maturation of SSU-rRNA	13	12	4.71	4.2e-05
1	GO:0016180	snRNA processing	12	11	4.35	0.00011
1	GO:0016573	histone acetylation	28	20	10.14	0.00015
1	GO:0031124	mRNA 3'-end processing	14	12	5.07	0.0002
1	GO:0032784	regulation of DNA-templated transcriptio...	11	10	3.98	0.00028
1	GO:0005730	nucleolus	184	125	66.3	2.3e-13
1	GO:0005654	nucleoplasm	448	257	161.42	1.8e-11
1	GO:0071013	catalytic step 2 spliceosome	27	26	9.73	4e-11
1	GO:0044452	nucleolar part	36	31	12.97	5.6e-10
1	GO:0032040	small-subunit processome	19	19	6.85	3.2e-09
1	GO:0097525	spliceosomal snRNP complex	17	17	6.13	2.6e-08
1	GO:0016591	DNA-directed RNA polymerase II holoenzy	40	31	14.41	7.8e-08
1	GO:0005681	spliceosomal complex	54	49	19.46	1e-07
1	GO:0044451	nucleoplasm part	159	111	57.29	9.1e-07
1	GO:0030686	90S preribosome	12	12	4.32	4.5e-06
1	GO:0043234	protein complex	644	307	232.05	2e-05
1	GO:0016592	mediator complex	14	12	5.04	0.00019
1	GO:0000794	condensed nuclear chromosome	21	16	7.57	0.00019
1	GO:0005634	nucleus	1014	509	365.36	0.00023
1	GO:0000790	nuclear chromatin	44	27	15.85	0.00048
1	GO:0090544	BAF-type complex	10	9	3.6	0.00067
1	GO:0000776	kinetochore	37	23	13.33	0.00098
1	GO:0005643	nuclear pore	25	17	9.01	0.00108
1	GO:0044454	nuclear chromosome part	76	47	27.38	0.00153
1	GO:0016607	nuclear speck	16	12	5.77	0.00168
1	GO:0070461	SAGA-type complex	11	9	3.96	0.00251
1	GO:0090575	RNA polymerase II transcription factor c...	27	17	9.73	0.00378
1	GO:0035097	histone methyltransferase complex	17	12	6.13	0.00385
2	GO:0004867	serine-type endopeptidase inhibitor acti...	11	11	2.34	3.6e-08
2	GO:0005509	calcium ion binding	53	28	11.26	2.9e-07
2	GO:0008201	heparin binding	21	15	4.46	1e-06
2	GO:0016597	amino acid binding	19	12	4.04	8.6e-05
2	GO:0005102	receptor binding	136	47	28.91	0.00014
2	GO:0004888	transmembrane signaling receptor activit...	40	19	8.5	0.00017
2	GO:0022836	gated channel activity	20	12	4.25	0.00017
2	GO:0005516	calmodulin binding	15	10	3.19	0.00018
2	GO:0019838	growth factor binding	18	11	3.83	0.00026
2	GO:0001077	transcriptional activator activity RNA	25	13	5.31	0.00063
2	GO:0005518	collagen binding	10	7	2.13	0.00123
2	GO:0055002	striated muscle cell development	19	14	4.07	1.4e-06
2	GO:0032835	glomerulus development	11	10	2.36	1.7e-06
2	GO:0007186	G-protein coupled receptor signaling pat...	48	27	10.29	3.6e-06
2	GO:0033555	multicellular organismal response to str...	10	9	2.14	7.2e-06
2	GO:0007270	neuron-neuron synaptic transmission	14	11	3	7.6e-06
2	GO:0010466	negative regulation of peptidase activit...	19	13	4.07	1.3e-05
2	GO:0098656	anion transmembrane transport	17	12	3.64	1.8e-05
2	GO:0051924	regulation of calcium ion transport	18	12	3.86	4.3e-05
2	GO:2000021	regulation of ion homeostasis	18	12	3.86	4.3e-05
2	GO:0032412	regulation of ion transmembrane transpor...	18	12	3.86	4.3e-05
2	GO:0007166	cell surface receptor signaling pathway	213	74	45.64	7.3e-05
2	GO:0044708	single-organism behavior	42	28	9	8.1e-05
2	GO:0030282	bone mineralization	12	9	2.57	0.0001
2	GO:0030217	T cell differentiation	12	9	2.57	0.0001
2	GO:0060349	bone morphogenesis	12	9	2.57	0.0001
2	GO:0002027	regulation of heart rate	12	9	2.57	0.0001
2	GO:0007519	skeletal muscle tissue development	22	13	4.71	0.00012
2	GO:0090288	negative regulation of cellular response...	22	13	4.71	0.00012
2	GO:0003014	renal system process	10	8	2.14	0.00013
2	GO:0022603	regulation of anatomical structure morph...	94	40	20.14	0.00014
2	GO:0019932	second-messenger-mediated signaling	20	12	4.29	0.00019
2	GO:0006937	regulation of muscle contraction	15	10	3.21	0.0002
2	GO:0010038	response to metal ion	23	13	4.93	0.00023
2	GO:0008217	regulation of blood pressure	13	9	2.79	0.00028
2	GO:0051241	negative regulation of multicellular org...	97	39	20.79	0.00029
2	GO:0060021	palate development	21	12	4.5	0.00036
2	GO:0030198	extracellular matrix organization	21	12	4.5	0.00036
2	GO:1903036	positive regulation of response to wound...	11	8	2.36	0.00037
2	GO:0007611	learning or memory	16	10	3.43	0.00042
2	GO:0009968	negative regulation of signal transducti...	115	40	24.64	0.00047
2	GO:0007155	cell adhesion	106	55	22.71	0.00059
2	GO:0030534	adult behavior	14	9	3	0.00063
2	GO:0050880	regulation of blood vessel size	14	9	3	0.00063
2	GO:0002573	myeloid leukocyte differentiation	17	10	3.64	0.00083
2	GO:0035637	multicellular organismal signaling	12	8	2.57	0.00091
2	GO:0006836	neurotransmitter transport	12	8	2.57	0.00091
2	GO:0030335	positive regulation of cell migration	41	18	8.79	0.00093
2	GO:0048468	cell development	220	83	47.14	0.00107
2	GO:0051216	cartilage development	23	12	4.93	0.00107
2	GO:0009887	organ morphogenesis	118	45	25.29	0.0011
2	GO:0045444	fat cell differentiation	29	14	6.21	0.00111
2	GO:0001505	regulation of neurotransmitter levels	15	9	3.21	0.00127
2	GO:0048520	positive regulation of behavior	15	9	3.21	0.00127
2	GO:0030799	regulation of cyclic nucleotide metaboli...	10	7	2.14	0.0013
2	GO:0050728	negative regulation of inflammatory resp...	10	7	2.14	0.0013
2	GO:0051149	positive regulation of muscle cell diffe...	10	7	2.14	0.0013
2	GO:0001508	action potential	10	7	2.14	0.0013
2	GO:0030193	regulation of blood coagulation	10	7	2.14	0.0013
2	GO:0044057	regulation of system process	48	28	10.29	0.00135
2	GO:0007600	sensory perception	39	17	8.36	0.00141
2	GO:0007507	heart development	73	27	15.64	0.00142
2	GO:0005615	extracellular space	104	58	22.35	1.8e-13
2	GO:0005578	proteinaceous extracellular matrix	39	30	8.38	1.5e-09
2	GO:0005887	integral component of plasma membrane	63	32	13.54	1.7e-07
2	GO:0005581	collagen trimer	10	10	2.15	1.9e-07
2	GO:0030017	sarcomere	19	16	4.08	8.2e-07
2	GO:0098797	plasma membrane protein complex	31	18	6.66	8.6e-06
2	GO:0005886	plasma membrane	335	121	71.99	1.1e-05
2	GO:0005604	basement membrane	17	12	3.65	1.8e-05
2	GO:0005576	extracellular region	375	130	80.58	6.5e-05
2	GO:0016021	integral component of membrane	320	109	68.77	0.00016
2	GO:0030425	dendrite	54	23	11.6	0.00033
2	GO:0043005	neuron projection	119	51	25.57	0.00048
2	GO:0043235	receptor complex	25	13	5.37	0.00071
2	GO:0045202	synapse	84	41	18.05	0.00123
2	GO:0030018	Z disc	10	7	2.15	0.00132
2	GO:0031012	extracellular matrix	47	36	10.1	0.00134
2	GO:0009986	cell surface	59	23	12.68	0.00147
2	GO:0044456	synapse part	60	29	12.89	0.0025
2	GO:0034702	ion channel complex	11	7	2.36	0.00297
3	GO:0003735	structural constituent of ribosome	22	20	4.19	4.2e-13
3	GO:0032543	mitochondrial translation	13	12	2.45	1.9e-08
3	GO:0006412	translation	82	41	15.44	2.8e-06
3	GO:0005761	mitochondrial ribosome	15	13	2.85	2.5e-08
3	GO:0015935	small ribosomal subunit	11	10	2.09	5.1e-07
3	GO:0000502	proteasome complex	17	11	3.23	4.2e-05
3	GO:0005737	cytoplasm	1220	281	231.68	0.00013
3	GO:0042645	mitochondrial nucleoid	11	8	2.09	0.00015
3	GO:0005739	mitochondrion	223	81	42.35	0.00025
3	GO:0015934	large ribosomal subunit	10	7	1.9	0.0006
3	GO:0005840	ribosome	37	27	7.03	0.00107
4	GO:0042384	cilium assembly	27	13	3.79	2e-05
4	GO:0036064	ciliary basal body	17	10	2.35	1.8e-05
4	GO:0030990	intraciliary transport particle	12	8	1.66	3.7e-05
4	GO:0072372	primary cilium	27	12	3.74	9.8e-05
4	GO:0098791	Golgi subcompartment	16	8	2.21	0.00057
5	GO:0015077	monovalent inorganic cation transmembran...	23	9	2	6.6e-05
5	GO:0006644	phospholipid metabolic process	31	11	2.65	2.4e-05
5	GO:0015672	monovalent inorganic cation transport	38	12	3.25	3.9e-05
5	GO:0006665	sphingolipid metabolic process	14	7	1.2	6e-05
5	GO:0005743	mitochondrial inner membrane	35	16	3.04	5.1e-09
5	GO:0016021	integral component of membrane	320	54	27.83	1.4e-07
5	GO:0043209	myelin sheath	23	9	2	6.5e-05
5	GO:0005777	peroxisome	20	8	1.74	0.00014
5	GO:0044455	mitochondrial membrane part	16	7	1.39	0.00019
5	GO:0070062	extracellular exosome	277	40	24.09	0.00042
5	GO:0005741	mitochondrial outer membrane	15	6	1.3	0.00102
5	GO:1990204	oxidoreductase complex	11	5	0.96	0.00141
TopGo with elim Fisher test, nodesize=10 and BH p<0.05
The P-value was from hypergeometric testing approach using topGO (Alexa and Rahnenfuhrer, 2016) in R package for GO term enrichment without multiple test correction. All expressed orthologous development-related genes were considered as background genes.

## Sheet: GO enrichment test for 9 specie
cluster	GO.ID	Term	Annotated	Significant	Expected	Fisher.elim
1	GO:0051276	chromosome organization	27	27	18.26	1.2e-05
1	GO:0006364	rRNA processing	16	16	10.82	0.0015
1	GO:0006259	DNA metabolic process	27	25	18.26	0.0015
1	GO:0000398	mRNA splicing via spliceosome	14	14	9.47	0.0035
1	GO:0010564	regulation of cell cycle process	18	17	12.18	0.0067
1	GO:0007067	mitotic nuclear division	17	16	11.5	0.0098
1	GO:0044427	chromosomal part	27	26	18	0.00013
1	GO:0044451	nucleoplasm part	24	23	16	0.00048
1	GO:0005730	nucleolus	36	32	24	0.0011
1	GO:0044428	nuclear part	114	93	76	0.00795
2	GO:0035639	purine ribonucleoside triphosphate bindi...	39	9	3.97	0.0075
2	GO:0032550	purine ribonucleoside binding	39	9	3.97	0.0075
2	GO:0032555	purine ribonucleotide binding	39	9	3.97	0.0075
2	GO:0044822	poly(A) RNA binding	54	11	5.49	0.0075
2	GO:0006412	translation	16	7	1.61	0.00028
2	GO:0070062	extracellular exosome	34	13	3.4	8.4e-07
3	GO:0044444	cytoplasmic part	100	15	8.33	0.0018
3	GO:0098588	bounding membrane of organelle	15	5	1.25	0.0042
4	GO:0045184	establishment of protein localization	26	5	1.42	0.0074
5	GO:0003824	catalytic activity	108	11	5.49	0.001
5	GO:0046872	metal ion binding	47	7	2.39	0.0029
5	GO:0055114	oxidation-reduction process	10	4	0.5	0.00067
5	GO:0044281	small molecule metabolic process	27	6	1.36	0.00071
5	GO:0016310	phosphorylation	21	5	1.06	0.00174
5	GO:0044429	mitochondrial part	12	4	0.55	0.001
5	GO:0031967	organelle envelope	17	4	0.78	0.0042
6	GO:0006508	proteolysis	28	4	0.94	0.0078
6	GO:0098588	bounding membrane of organelle	15	4	0.69	0.0026
TopGo with elim Fisher test, nodesize=10 and p<0.01 without correction
