# Supplementary material for: Comparative Gene Analysis in Chordate Embryonic Development Reveals Co-existence of Von Baer’s and Haeckel’s Postulates
Source: Research Square preprint supplement (doi:10.21203/rs.3.rs-579345/v1), 2021-06-17
Supplement: Supplementary file 18 [file c14ac8ed5a7f21abda51f12c.xlsx]

## Sheet: Sheet1
Supplementary Data 8. KEGG pathways enrichment test for progressive model (PM) and continuous model(CM).
Pathway	Pvalue for PM	No.gene	Pvalue for CM	No.gene
Proteasome	0.00120732	15	0.9999	5
Axon guidance	0.00137021	42	0.96486	36
Renin secretion	0.00546133	18	0.619119	16
Amyotrophic lateral sclerosis (ALS)	0.0108976	13	0.825501	10
Glutamatergic synapse	0.0125177	24	0.973784	19
Dopaminergic synapse	0.0242177	25	0.94056
MAPK signaling pathway	0.0341803	52	0.942271	54
Insulin secretion	0.0447344	19	0.89819	17
Peroxisome	0.994126	8	0.0472331	24
Regulation of lipolysis in adipocytes	0.969416	6	0.046126	17
DNA replication	0.969428	8	0.0422518	21
Toll-like receptor signaling pathway	0.989266	7	0.0422518	21
Ribosome biogenesis in eukaryotes	0.572288	19	0.0356695	32
B cell receptor signaling pathway	0.944299	7	0.0353826	18
Bile secretion	0.980181	6	0.0353826	18
Cell cycle	0.995036	22	0.0347164	51
Proximal tubule bicarbonate reclamation	0.946582	3	0.0282286	10
RNA transport	0.860193	33	0.0214849	60
Adipocytokine signaling pathway	0.997962	5	0.0205731	20
Histidine metabolism	0.999533	1	0.01975	11
Base excision repair	0.83751	7	0.0192171	16
ECM-receptor interaction	0.340114	26	0.0109833	41
Lysine degradation	0.993793	3	0.00676069	14
Spliceosome	0.999988	18	7.27e-05	62
